# Supplementary material for: De novo transcriptome assembly of brackish water flea Diaphanosoma celebensis based on short-term cadmium and benzo[a]pyrene exposure experiments
Source: Hereditas. 2018 Nov 17;155:36. doi: 10.1186/s41065-018-0075-3 (PMC6240204; doi:10.1186/s41065-018-0075-3)
Supplement: Supplementary file 1 — Table S1. Summary of the library construction. Table S2. Summary of the de novo transcriptome assembly results. Table S3. Transcriptional expression analysis. Table S4. Gene Ontology (GO) analysis for the three categories. Table S5. KEGG pathway analysis for uniquely or commonly up- or downregulated transcripts in the transcriptome of Diaphanosoma celebensis. (XLSX 21456 kb) [file 41065_2018_75_MOESM1_ESM.xlsx]

## Sheet: Contents
Table S1	Summary of the library construction
Table S2	Summary of the de novo transcriptome assembly results
Table S3	Transcriptional expression analysis
Table S4	Gene Ontology (GO) analysis for the three categories
Table S5	KEGG pathway analysis for uniquely or commonly up- or downregulated transcripts in the transcriptome of Diaphanosoma celebensis exposed to Cd or BaP

## Sheet: Table S1
Library No.	Library name	Library type	#Total reads	Mapping rate (%)	#ofTranscriptswhen Read count > 0	#of Transcriptswhen TMM > 1
1	DC_BAP1	101 x 2 TruseqStranded mRNA Prep Kit	71640154	94.09	70365	25660
2	DC_BAP2	101 x 2 TruseqStranded mRNA Prep Kit	77663154	94.16	70743	25552
3	DC_BAP3	101 x 2 TruseqStranded mRNA Prep Kit	56352028	94.32	58356	25118
4	DC_CD1	101 x 2 TruseqStranded mRNA Prep Kit	68698442	93.64	65766	24205
5	DC_CD2	101 x 2 TruseqStranded mRNA Prep Kit	60061970	93.8	61955	24080
6	DC_CD3	102 x 2 TruseqStranded mRNA Prep Kit	61459828	93.84	64663	24551
7	DC_CTL1	103 x 2 TruseqStranded mRNA Prep Kit	58638336	93.97	55277	24860
8	DC_CTL2	104 x 2 TruseqStranded mRNA Prep Kit	77078954	93.95	64258	24282
9	DC_CTL3	105 x 2 TruseqStranded mRNA Prep Kit	60633176	93.74	62334	24532

## Sheet: Table S2
Counts of transcripts
Total trinity ‘genes’	75057
Total trinity transcripts	102897
GC%	49.27
Stats based on ALL transcript contigs
Contig N10 (bp)	5089
Contig N20 (bp)	3727
Contig N30 (bp)	2965
Contig N40 (bp)	2363
Contig N50 (bp)	1883
Median contig length (bp)	459
Average contig (bp)	967.84
Total assembled bases	99588011
Remove redundant transcripts
Redundant genes	2819
Redundant transcripts	4439
Remain genes	72238
Remain transcripts	98458
Annotation summary
Total transcripts	98458
sprot_Top_BLASTX_hit	32410
sprot_Top_BLASTP_hit	20989

## Sheet: Table S3
gene_id	logFC(1.Group_CTL_vs_Group_CD)	logFC(2.Group_CTL_vs_Group_BAP)	logFC(3.Group_CD_vs_Group_BAP)	absolute fold change(1.Group_CTL_vs_Group_CD)	absolute fold change(2.Group_CTL_vs_Group_BAP)	absolute fold change(3.Group_CD_vs_Group_BAP)	PValue(1.Group_CTL_vs_Group_CD)	PValue(2.Group_CTL_vs_Group_BAP)	PValue(3.Group_CD_vs_Group_BAP)	FDR(1.Group_CTL_vs_Group_CD)	FDR(2.Group_CTL_vs_Group_BAP)	FDR(3.Group_CD_vs_Group_BAP)
TRINITY_DN33873_c6_g1_i8	6.31155	1.49016	-4.86053	79.4264	2.8092	29.0513	4.90017e-33	0.0325301	7.03573e-18	4.08728e-28	0.604654	4.47884e-14
TRINITY_DN29567_c1_g1_i1	-6.57287	-0.418834	6.10368	95.1984	1.33685	68.7688	2.96833e-30	0.266751	4.09409e-21	1.23796e-25	1	4.56092e-17
TRINITY_DN35132_c1_g1_i5	4.57818	0.294633	-4.32784	23.8875	1.22657	20.0821	9.59161e-28	0.670915	6.37249e-28	2.66682e-23	1	5.67929e-23
TRINITY_DN17967_c0_g1_i1	5.73176	-0.0567306	-5.95893	53.1414	1.04011	62.2038	9.48566e-25	1	3.19188e-24	1.97802e-20	1	1.42234e-19
TRINITY_DN28039_c0_g1_i2	6.0154	0.900737	-5.12971	64.6867	1.86702	35.0105	2.76178e-22	0.608944	3.62224e-08	4.60726e-18	1	2.2111e-05
TRINITY_DN35762_c0_g1_i7	-10.6718	-4.23887	6.39953	1631.26	18.8811	84.4208	1.05816e-21	3.22221e-05	0.00583458	1.47104e-17	0.0121428	0.206591
TRINITY_DN16140_c0_g1_i1	2.94419	0.638538	-2.36211	7.69643	1.55675	5.14121	1.36467e-20	0.0597617	4.36649e-19	1.62613e-16	0.745864	3.24292e-15
TRINITY_DN33873_c6_g1_i5	3.44548	-1.41159	-4.88162	10.8942	2.6603	29.479	4.25147e-20	0.148888	4.83611e-09	4.43274e-16	0.996445	3.84825e-06
TRINITY_DN33873_c6_g1_i6	3.20091	0.309873	-2.93475	9.19539	1.2396	7.64621	5.81755e-19	0.518237	9.96631e-14	5.39164e-15	1	2.27748e-10
TRINITY_DN18701_c0_g4_i1	3.53771	-0.589275	-4.21152	11.6133	1.50449	18.5266	2.05178e-17	0.3906	2.12278e-22	1.71141e-13	1	4.72966e-18
TRINITY_DN13787_c0_g2_i1	10.2031	10.3556	0.103297	1178.81	1310.19	1.07423	5.54656e-17	6.05096e-16	0.818275	4.08512e-13	5.17623e-12	1
TRINITY_DN16228_c0_g1_i1	-3.60437	-1.09161	2.46746	12.1625	2.13112	5.5307	5.8771e-17	0.000937878	1.03982e-07	4.08512e-13	0.109305	5.82836e-05
TRINITY_DN27504_c0_g1_i1	6.66143	2.29892	-4.41569	101.226	4.92088	21.3431	1.58429e-16	0.117787	3.3163e-15	1.01652e-12	0.935363	1.01916e-11
TRINITY_DN62641_c0_g1_i1	10.4528	0	-10.4703	1401.51	0	1418.67	1.90296e-16	0	9.38873e-22	1.13377e-12	0	1.67349e-17
TRINITY_DN22371_c0_g1_i1	3.91734	-0.168756	-4.17046	15.1091	1.12409	18.0067	2.4415e-16	0.863472	3.94792e-20	1.35765e-12	1	3.9094e-16
TRINITY_DN22371_c0_g1_i2	3.68844	-0.0661088	-3.83237	12.8924	1.04689	14.2449	5.49695e-16	0.930693	1.12261e-17	2.86566e-12	1	6.66995e-14
TRINITY_DN6308_c0_g1_i1	-2.83337	-1.44596	1.33403	7.12737	2.72444	2.52106	1.70752e-15	7.0872e-08	2.39922e-05	8.0518e-12	0.000101045	0.00553946
TRINITY_DN23340_c0_g1_i1	2.35503	-0.27372	-2.68383	5.11605	1.20892	6.42561	1.77198e-15	0.351293	7.3516e-24	8.0518e-12	1	2.18396e-19
TRINITY_DN35356_c1_g1_i1	2.21271	-0.254873	-2.52781	4.63546	1.19323	5.76694	1.8341e-15	0.41354	1.85907e-16	8.0518e-12	1	8.3837e-13
TRINITY_DN30909_c0_g1_i3	3.80707	-0.111866	-3.98024	13.9972	1.08063	15.7823	1.95398e-15	0.861371	7.62334e-19	8.14918e-12	1	5.22621e-15
TRINITY_DN46066_c0_g1_i1	2.51762	-0.18577	-2.75726	5.72637	1.13742	6.76113	4.77098e-15	0.599186	1.30472e-15	1.89501e-11	1	4.30664e-12
TRINITY_DN27575_c0_g1_i4	3.52011	1.82123	-1.75332	11.4725	3.53382	3.37134	2.22805e-14	0.00882005	0.000175951	8.44743e-11	0.349674	0.0245785
TRINITY_DN26722_c0_g9_i1	2.23077	-0.958205	-3.24722	4.69383	1.94289	9.49532	5.46122e-14	0.0200687	2.1598e-16	1.98055e-10	0.499928	8.74935e-13
TRINITY_DN35503_c0_g1_i1	2.05617	-0.999853	-3.11624	4.15881	1.9998	8.67127	1.53193e-13	0.00982601	7.07637e-16	5.32417e-10	0.369012	2.52264e-12
TRINITY_DN24288_c0_g4_i2	11.646	12.4887	0.819019	3204.85	5747.36	1.76421	1.9998e-13	1.22211e-12	0.336255	6.67221e-10	7.46744e-09	0.972126
TRINITY_DN33045_c0_g1_i4	3.00904	-0.0220489	-3.1036	8.05029	1.0154	8.59564	3.33415e-13	0.966246	1.23631e-11	1.06963e-09	1	1.74626e-08
TRINITY_DN35132_c1_g1_i4	2.47402	0.171757	-2.34965	5.55589	1.12643	5.09699	6.8292e-13	0.716287	7.20361e-11	2.10038e-09	1	8.67567e-08
TRINITY_DN26722_c0_g3_i2	2.14923	-0.952851	-3.1619	4.43591	1.93569	8.95007	7.05072e-13	0.0362286	2.51446e-13	2.10038e-09	0.625205	5.33557e-10
TRINITY_DN35549_c0_g1_i2	6.47839	5.99572	-0.539253	89.1642	63.8105	1.45322	1.20073e-12	1.40953e-10	0.241894	3.45359e-09	5.1496e-07	0.922348
TRINITY_DN34518_c0_g1_i2	9.68745	8.89615	-0.823273	824.545	476.439	1.76942	1.69789e-12	2.15073e-07	0.175668	4.72075e-09	0.000229978	0.852137
TRINITY_DN50902_c0_g7_i1	-9.28025	-1.13884	8.11711	621.777	2.20204	277.648	2.52911e-12	0.284963	9.17693e-05	6.80502e-09	1	0.0154606
TRINITY_DN26722_c0_g6_i1	2.12938	-1.22771	-3.41513	4.3753	2.34195	10.6673	2.85389e-12	0.00327385	1.21105e-19	7.43893e-09	0.21543	1.07931e-15
TRINITY_DN50929_c0_g1_i1	-2.07454	-0.115764	1.90258	4.21209	1.08355	3.73882	4.28744e-12	0.63943	9.55233e-12	1.08369e-08	1	1.41887e-08
TRINITY_DN31652_c0_g1_i1	1.92054	-0.0188016	-1.99947	3.78565	1.01312	3.99853	7.75876e-12	0.943892	3.81538e-14	1.90343e-08	1	8.94828e-11
TRINITY_DN30909_c0_g1_i1	3.16987	-0.1808	-3.40906	8.99963	1.13351	10.6226	8.73565e-12	0.765732	1.47581e-17	2.08185e-08	1	8.22047e-14
TRINITY_DN33532_c0_g3_i1	1.80281	0.082401	-1.77405	3.489	1.05878	3.42013	1.07364e-11	0.755996	1.0976e-12	2.48759e-08	1	2.08128e-09
TRINITY_DN35503_c0_g2_i1	1.97458	-1.10586	-3.13888	3.93014	2.15228	8.80839	1.19072e-11	0.00397859	1.8814e-16	2.61023e-08	0.236471	8.3837e-13
TRINITY_DN23198_c0_g1_i1	-2.45358	-1.14141	1.26377	5.47773	2.20597	2.40122	1.21424e-11	0.00132831	0.00204636	2.61023e-08	0.133055	0.115968
TRINITY_DN30630_c0_g1_i4	9.74856	8.51036	-1.27734	860.22	364.649	2.42392	1.22045e-11	0.000327658	0.166664	2.61023e-08	0.0566099	0.836226
TRINITY_DN27943_c0_g1_i3	-4.21511	-0.199924	3.97079	18.5726	1.14864	15.6793	1.33545e-11	0.588723	5.16857e-10	2.78478e-08	1	4.90035e-07
TRINITY_DN14259_c0_g1_i1	1.76078	0.00607492	-1.80883	3.38881	1.00422	3.50358	1.69947e-11	0.993167	2.68455e-12	3.45743e-08	1	4.78505e-09
TRINITY_DN36267_c0_g1_i1	2.38464	-0.815858	-3.26596	5.22215	1.76034	9.61951	1.76201e-11	0.093377	3.83365e-19	3.4993e-08	0.867144	3.10602e-15
TRINITY_DN34056_c1_g1_i6	-2.73204	-0.962617	1.71965	6.64396	1.94884	3.29356	1.94538e-11	0.000576861	1.49904e-05	3.77362e-08	0.0815653	0.00379539
TRINITY_DN33006_c0_g1_i3	-9.03004	-0.818354	8.15422	522.773	1.76339	284.883	2.46649e-11	0.43196	7.89778e-05	4.67574e-08	1	0.013883
TRINITY_DN31652_c0_g1_i2	1.9033	0.0275195	-1.93433	3.74069	1.01926	3.822	3.21731e-11	0.947226	3.30925e-13	5.96354e-08	1	6.41145e-10
TRINITY_DN33873_c6_g1_i3	-2.03266	-0.69973	1.27266	4.09159	1.6242	2.41607	5.26362e-11	0.00374214	2.66365e-05	9.54444e-08	0.230321	0.00599985
TRINITY_DN32323_c0_g2_i1	1.99114	-0.0758858	-2.12	3.9755	1.05401	4.34695	8.09433e-11	0.737109	2.03459e-14	1.4365e-07	1	4.90073e-11
TRINITY_DN15565_c1_g1_i1	2.41909	-0.0103608	-2.48635	5.34834	1.00721	5.60359	1.0926e-10	0.97631	1.00609e-14	1.89864e-07	1	2.80203e-11
TRINITY_DN35905_c6_g1_i1	2.32836	-0.612536	-3.00648	5.02232	1.52894	8.036	1.18321e-10	0.205166	2.42933e-16	2.01414e-07	1	9.41333e-13
TRINITY_DN55763_c0_g1_i1	-8.90467	-0.218402	8.63104	479.262	1.16344	396.462	1.28268e-10	0.761713	1.54481e-08	2.13979e-07	1	1.10141e-05
TRINITY_DN35501_c1_g1_i2	-2.79449	-0.924097	1.82134	6.93787	1.8975	3.53409	1.41841e-10	0.0336679	0.000349657	2.31982e-07	0.6093	0.039697
TRINITY_DN10355_c0_g2_i1	-5.22211	-0.416318	4.75634	37.3261	1.33452	27.0271	1.55054e-10	0.448764	1.06539e-08	2.48715e-07	1	8.11537e-06
TRINITY_DN31812_c0_g1_i1	-8.84914	-1.99215	6.78337	461.164	3.9783	110.154	1.66273e-10	0.135802	0.0088055	2.61679e-07	0.966796	0.257637
TRINITY_DN16488_c0_g1_i1	-3.0238	-0.744599	2.22926	8.13305	1.67551	4.68894	2.10414e-10	0.030759	8.36269e-06	3.18247e-07	0.589834	0.00243562
TRINITY_DN34354_c0_g1_i5	-9.11312	-9.09625	0	553.761	547.324	0	2.11355e-10	2.08724e-10	0	3.18247e-07	6.86734e-07	0
TRINITY_DN34399_c2_g1_i2	-3.052	-0.668077	2.33024	8.2936	1.58895	5.02891	2.13663e-10	0.00632655	1.75346e-07	3.18247e-07	0.297884	9.52877e-05
TRINITY_DN35549_c0_g1_i4	5.86417	6.1066	0.199432	58.2492	68.9078	1.14825	2.17493e-10	1.24447e-14	0.647956	3.18269e-07	9.67788e-11	1
TRINITY_DN32663_c0_g1_i1	-1.69658	-0.332381	1.30347	3.24132	1.25909	2.46821	2.44254e-10	0.225298	3.12538e-06	3.51267e-07	1	0.00110532
TRINITY_DN30756_c0_g1_i1	-8.89816	-8.8818	0	477.105	471.725	0	3.51229e-10	3.4452e-10	0	4.96548e-07	1.09154e-06	0
TRINITY_DN35503_c0_g1_i3	2.07319	-1.06679	-3.19917	4.20816	2.09477	9.18428	3.7439e-10	0.0182229	3.89399e-15	5.20471e-07	0.475698	1.1568e-11
TRINITY_DN27310_c0_g3_i1	2.86664	0.0417014	-2.86745	7.29365	1.02933	7.29777	3.8823e-10	0.954195	1.63438e-13	5.30863e-07	1	3.64147e-10
TRINITY_DN29452_c0_g1_i4	-3.21331	-0.212081	2.94656	9.27477	1.15836	7.70907	4.74297e-10	0.40989	1.34745e-09	6.3809e-07	1	1.16589e-06
TRINITY_DN61211_c0_g1_i1	2.5457	-0.286516	-2.89292	5.8389	1.21969	7.42773	5.35968e-10	0.603771	3.08978e-15	7.09613e-07	1	9.83454e-12
TRINITY_DN30379_c0_g1_i2	2.92103	0.532957	-2.4523	7.57385	1.44689	5.47289	6.78137e-10	0.388021	2.99585e-09	8.83814e-07	1	2.42724e-06
TRINITY_DN26722_c0_g4_i1	2.07467	-1.07922	-3.21381	4.21249	2.11289	9.27796	9.64142e-10	0.0270291	1.24065e-14	1.23723e-06	0.559849	3.25205e-11
TRINITY_DN33968_c1_g1_i4	-1.69383	-0.663617	0.974832	3.23514	1.58405	1.96541	1.0093e-09	0.00446347	0.00023082	1.27556e-06	0.249069	0.0297271
TRINITY_DN41299_c0_g1_i1	1.9308	-0.227437	-2.2135	3.81268	1.17075	4.638	1.18833e-09	0.421506	1.49117e-14	1.4794e-06	1	3.69155e-11
TRINITY_DN46226_c0_g1_i1	-2.09725	-0.223781	1.81507	4.27892	1.16779	3.51877	1.32657e-09	0.443076	3.38893e-08	1.62722e-06	1	2.09742e-05
TRINITY_DN61020_c0_g1_i1	2.02634	-0.107996	-2.19107	4.07371	1.07773	4.56644	1.36447e-09	0.767921	3.07382e-13	1.64944e-06	1	6.08768e-10
TRINITY_DN32903_c1_g3_i2	8.93797	5.51853	-3.45452	490.452	45.8397	10.9626	1.89381e-09	0.0208412	5.35441e-07	2.25663e-06	0.505322	0.000249841
TRINITY_DN19595_c0_g1_i1	-2.88514	-0.711483	2.11752	7.38776	1.63749	4.33946	2.35374e-09	0.0299292	1.61498e-05	2.76518e-06	0.582838	0.00402039
TRINITY_DN30969_c0_g1_i3	-8.595	-2.46537	6.12167	386.682	5.5227	69.6317	2.77668e-09	0.0787229	0.0327558	3.21674e-06	0.824471	0.471855
TRINITY_DN33968_c1_g1_i5	-1.55995	-0.768881	0.736578	2.94844	1.70395	1.66622	3.21254e-09	0.00111522	0.00420422	3.6707e-06	0.119685	0.171828
TRINITY_DN35927_c2_g8_i1	-1.68822	-2.28867	-0.663748	3.22258	4.88607	1.58419	3.68727e-09	1.25327e-11	0.0583813	4.13692e-06	6.70059e-08	0.592352
TRINITY_DN35523_c0_g1_i1	-5.80486	0.330778	6.08034	55.9031	1.25769	67.6653	3.71976e-09	0.780403	9.91594e-06	4.13692e-06	1	0.00275256
TRINITY_DN2627_c0_g1_i1	-1.96804	-0.716473	1.19286	3.91236	1.64316	2.28605	3.82012e-09	0.0187233	0.000409651	4.19263e-06	0.482376	0.0437232
TRINITY_DN29184_c0_g1_i1	1.76271	0.224725	-1.59391	3.39335	1.16855	3.01866	5.12519e-09	0.495615	1.66891e-09	5.55191e-06	1	1.41654e-06
TRINITY_DN22485_c1_g1_i2	-1.74304	-0.0888128	1.59743	3.34739	1.06349	3.02603	5.85675e-09	0.706578	2.32558e-08	6.26304e-06	1	1.53526e-05
TRINITY_DN2353_c0_g1_i1	2.63249	-0.415011	-3.11338	6.20096	1.33331	8.6541	6.66654e-09	0.50546	2.90173e-13	7.03877e-06	1	6.00475e-10
TRINITY_DN34269_c0_g1_i1	-1.72541	-0.741372	0.925644	3.30675	1.67176	1.89953	7.09687e-09	0.00358584	0.00168939	7.39946e-06	0.225384	0.104557
TRINITY_DN30073_c0_g1_i2	2.03665	-0.173102	-2.26344	4.10292	1.12748	4.80134	7.31997e-09	0.603021	1.25402e-11	7.53785e-06	1	1.74626e-08
TRINITY_DN3564_c0_g1_i1	-2.75884	-0.199526	2.50601	6.76851	1.14832	5.68046	7.61539e-09	0.42655	3.38063e-08	7.74643e-06	1	2.09742e-05
TRINITY_DN1254_c0_g1_i1	-1.49147	-0.538466	0.894546	2.81175	1.45243	1.85903	7.8006e-09	0.0270449	0.000301279	7.83922e-06	0.559906	0.0360895
TRINITY_DN34056_c1_g1_i2	-2.62536	-0.845638	1.72819	6.17038	1.79706	3.31311	8.18176e-09	0.00620947	0.00014338	8.09398e-06	0.293983	0.0212972
TRINITY_DN20858_c0_g1_i1	-2.56789	-0.930008	1.57903	5.92943	1.90529	2.98769	8.31029e-09	0.00137973	0.000131223	8.09398e-06	0.135747	0.0201289
TRINITY_DN30141_c0_g1_i1	-2.00537	-1.32536	0.620873	4.01492	2.50595	1.53781	8.34521e-09	4.98781e-06	0.0831285	8.09398e-06	0.00310251	0.674771
TRINITY_DN33968_c1_g1_i2	-1.71059	-0.727365	0.929015	3.27295	1.65561	1.90398	9.14887e-09	0.00254706	0.00121603	8.77145e-06	0.190127	0.0852005
TRINITY_DN34327_c0_g1_i1	-2.4117	-0.521636	1.8372	5.32102	1.43558	3.57316	9.89844e-09	0.0496284	3.37342e-06	9.35279e-06	0.7001	0.00116983
TRINITY_DN35912_c0_g1_i15	8.7072	0	-8.72574	417.953	0	423.359	9.97948e-09	0	9.30391e-12	9.35279e-06	0	1.41887e-08
TRINITY_DN32461_c0_g3_i1	-2.51073	-0.539685	1.91182	5.69908	1.45365	3.76282	1.11144e-08	0.14684	9.03495e-06	1.03007e-05	0.993844	0.00258081
TRINITY_DN36053_c0_g4_i1	-1.88092	4.10157	5.91291	3.6831	17.167	60.2511	1.26492e-08	9.5554e-05	6.99668e-11	1.15944e-05	0.0249209	8.54189e-08
TRINITY_DN30929_c0_g1_i1	-1.58136	-0.577183	0.945795	2.99253	1.49193	1.92625	1.48446e-08	0.0131076	0.000290865	1.34587e-05	0.419522	0.0351252
TRINITY_DN32654_c0_g1_i2	-8.46855	0.0870529	8.52655	354.232	1.0622	368.762	1.53088e-08	0.949893	1.63365e-08	1.37303e-05	1	1.15551e-05
TRINITY_DN34782_c0_g2_i5	8.61549	7.90573	-0.731585	392.211	239.808	1.66046	1.71055e-08	0.000986956	0.414217	1.51786e-05	0.113023	1
TRINITY_DN46183_c0_g1_i1	-1.45294	-1.0216	0.367065	2.73766	2.03017	1.28973	2.22217e-08	0.00135354	0.235032	1.95109e-05	0.134637	0.91302
TRINITY_DN20580_c0_g1_i1	-3.58478	-0.691435	2.83899	11.9984	1.61489	7.1552	2.26943e-08	0.0160722	3.01566e-06	1.97183e-05	0.453855	0.00107309
TRINITY_DN29184_c0_g1_i2	2.96203	1.26552	-1.76059	7.79217	2.40414	3.38838	2.31589e-08	0.0405075	1.65159e-05	1.9842e-05	0.650899	0.00406611
TRINITY_DN55847_c0_g1_i1	-1.37945	-0.434808	0.881942	2.60169	1.35173	1.84285	2.35492e-08	0.108032	0.000676327	1.9842e-05	0.910421	0.0592099
TRINITY_DN22333_c0_g1_i1	1.96508	-0.226888	-2.24667	3.90434	1.17031	4.74586	2.37134e-08	0.531528	4.64923e-12	1.9842e-05	1	7.8179e-09
TRINITY_DN17085_c0_g1_i1	-8.34475	-0.608801	7.70116	325.102	1.52499	208.103	2.37882e-08	0.36893	2.26593e-07	1.9842e-05	1	0.00011606
TRINITY_DN33777_c0_g1_i3	-6.78194	0.0456208	6.7556	110.044	1.03213	108.054	2.47156e-08	0.99692	1.65302e-09	2.04114e-05	1	1.41654e-06
TRINITY_DN34056_c1_g1_i5	-2.29268	-0.71479	1.52829	4.89965	1.64124	2.88444	2.79304e-08	0.0440755	0.000523416	2.28402e-05	0.670808	0.0509524
TRINITY_DN29942_c0_g1_i3	-1.56686	-0.580888	0.929957	2.96258	1.49577	1.90522	2.82175e-08	0.0130388	0.000376444	2.2851e-05	0.418689	0.0415731
TRINITY_DN35993_c1_g1_i2	9.28083	8.70068	-0.633182	622.028	416.07	1.55098	3.1233e-08	7.98709e-06	0.441429	2.50497e-05	0.00440805	1
TRINITY_DN34480_c0_g1_i2	-2.23582	3.76473	5.93129	4.7103	13.5924	61.0233	3.22083e-08	0.000228548	7.95335e-12	2.55859e-05	0.0434465	1.24354e-08
TRINITY_DN35016_c0_g2_i25	-8.39586	-1.09143	7.2387	336.827	2.13084	151.031	3.34854e-08	0.345692	0.00117383	2.63495e-05	1	0.0830767
TRINITY_DN17468_c0_g1_i1	-1.9852	-0.659928	1.27045	3.95918	1.58	2.41237	3.42635e-08	0.0071946	0.000202355	2.67098e-05	0.318558	0.0269975
TRINITY_DN27707_c0_g1_i2	-5.86587	-1.53729	4.26921	58.3179	2.90249	19.2824	4.12647e-08	0.0155704	3.86348e-05	3.18697e-05	0.447414	0.00810167
TRINITY_DN35925_c0_g1_i8	9.19573	7.61185	-1.6485	586.395	195.611	3.13508	4.29394e-08	0.00422894	0.11833	3.28589e-05	0.244433	0.758256
TRINITY_DN34585_c0_g2_i5	-4.90169	-1.57383	3.25954	29.892	2.97695	9.57676	4.57137e-08	0.0135683	0.000494388	3.46639e-05	0.425293	0.049451
TRINITY_DN35308_c0_g1_i4	-5.73879	-2.18095	3.5216	53.4006	4.53453	11.4844	4.69303e-08	0.0537584	0.0389302	3.52658e-05	0.720172	0.506353
TRINITY_DN35968_c2_g4_i2	-1.77882	4.29598	6.005	3.43146	19.6435	64.2223	4.73659e-08	9.71573e-05	1.72682e-10	3.52753e-05	0.0251094	1.92372e-07
TRINITY_DN26107_c0_g2_i1	-6.76807	-0.688136	6.047	108.992	1.6112	66.1195	4.86165e-08	0.581031	0.00226618	3.58863e-05	1	0.122797
TRINITY_DN21942_c0_g1_i1	-3.36308	-0.210027	3.10021	10.2894	1.15671	8.57542	5.04954e-08	0.528212	1.89798e-07	3.69463e-05	1	0.000100843
TRINITY_DN29595_c0_g1_i3	8.73683	8.91441	0.120998	426.627	482.509	1.08749	6.07786e-08	1.39743e-07	0.861995	4.40835e-05	0.000166434	1
TRINITY_DN36146_c0_g1_i1	-1.60165	-0.0608082	1.48528	3.03489	1.04305	2.79971	6.93411e-08	0.801963	3.57118e-07	4.98485e-05	1	0.000172973
TRINITY_DN18701_c0_g1_i1	2.0697	-0.472821	-2.60646	4.19801	1.38782	6.09009	6.99222e-08	0.344091	2.30279e-12	4.98485e-05	1	4.18836e-09
TRINITY_DN36053_c0_g2_i3	-1.5008	4.25527	5.68615	2.82999	19.097	51.4875	7.85364e-08	0.000113915	1.74902e-09	5.55152e-05	0.0279219	1.47053e-06
TRINITY_DN28039_c0_g1_i4	3.7027	-1.00332	-4.76442	13.0204	2.00461	27.1791	7.9237e-08	0.397418	1.10715e-09	5.55398e-05	1	9.86714e-07
TRINITY_DN24836_c0_g1_i4	7.05806	6.5709	-0.541186	133.256	95.069	1.45517	8.13637e-08	0.000537046	0.585954	5.65552e-05	0.0772119	1
TRINITY_DN33532_c0_g3_i3	1.84646	0.259781	-1.64094	3.59616	1.1973	3.1187	8.41103e-08	0.343399	2.07211e-08	5.79812e-05	1	1.3885e-05
TRINITY_DN35356_c0_g1_i1	1.6223	-0.365817	-2.04764	3.07865	1.28861	4.13428	9.06405e-08	0.305646	2.93542e-10	6.19706e-05	1	3.07777e-07
TRINITY_DN8620_c0_g1_i1	-1.43969	-1.73286	-0.355566	2.71263	3.32386	1.27949	9.14549e-08	2.53027e-09	0.233383	6.20191e-05	6.01247e-06	0.911331
TRINITY_DN20847_c2_g1_i1	-2.43333	-0.847525	1.5323	5.40137	1.79941	2.89246	9.35248e-08	0.000486776	0.000228976	6.29112e-05	0.0729922	0.029575
TRINITY_DN26722_c0_g3_i1	2.01679	-0.349109	-2.42402	4.04682	1.27377	5.36664	9.54897e-08	0.414354	2.27161e-12	6.37191e-05	1	4.18836e-09
TRINITY_DN24984_c0_g1_i5	8.95844	7.1472	-1.85623	497.461	141.75	3.6206	1.02815e-07	0.00734616	0.067154	6.80628e-05	0.321335	0.627479
TRINITY_DN34832_c0_g1_i1	2.98192	2.26748	-0.740348	7.90038	4.8148	1.67058	1.16617e-07	0.0180073	0.268994	7.62183e-05	0.473118	0.952692
TRINITY_DN28224_c0_g1_i1	-2.17809	-0.997685	1.12617	4.52555	1.99679	2.18278	1.16962e-07	0.000157608	0.00438135	7.62183e-05	0.0342578	0.176765
TRINITY_DN35968_c2_g2_i1	-2.48747	4.10995	6.52801	5.60793	17.267	92.2839	1.31535e-07	0.000153197	4.97824e-12	8.50498e-05	0.0336028	8.21613e-09
TRINITY_DN34388_c0_g1_i11	-1.61378	-0.615598	0.942612	3.06053	1.53219	1.922	1.37601e-07	0.0322898	0.0024112	8.80478e-05	0.6039	0.127987
TRINITY_DN20858_c0_g1_i2	-2.88588	-0.771254	2.05591	7.39159	1.70675	4.15807	1.38282e-07	0.0701592	8.85465e-05	8.80478e-05	0.793683	0.01506
TRINITY_DN34824_c0_g1_i5	8.55555	7.27429	-1.30492	376.249	154.803	2.4707	1.48482e-07	0.00014696	0.0427867	9.32626e-05	0.0325352	0.523868
TRINITY_DN27010_c1_g1_i1	-2.19943	-0.761331	1.38593	4.59298	1.69505	2.6134	1.48708e-07	0.0139797	0.000712317	9.32626e-05	0.428215	0.0613299
TRINITY_DN35501_c1_g1_i4	-1.54179	-0.914533	0.576422	2.91155	1.88496	1.49115	1.6781e-07	0.00161743	0.0754647	0.000104406	0.148936	0.652082
TRINITY_DN34480_c0_g1_i5	-2.46171	4.81559	7.20781	5.5087	28.1603	147.832	1.69967e-07	0.000101878	1.39436e-11	0.000104406	0.0260328	1.91182e-08
TRINITY_DN33817_c0_g1_i1	1.31292	-0.542685	-1.91369	2.48444	1.45668	3.76773	1.70232e-07	0.0226711	6.33997e-16	0.000104406	0.521269	2.35429e-12
TRINITY_DN40916_c0_g2_i1	-1.81521	-0.22035	1.54257	3.51911	1.16502	2.91313	1.79556e-07	0.412188	7.95728e-06	0.000109321	1	0.00234049
TRINITY_DN36053_c0_g2_i6	-1.81629	4.40444	6.15109	3.52174	21.1772	71.0661	1.99373e-07	0.00016588	6.65684e-10	0.000120507	0.0356534	6.17991e-07
TRINITY_DN16753_c0_g1_i1	-8.09815	-3.07222	4.98569	274.022	8.41068	31.6841	2.12907e-07	0.0133934	0.0789209	0.000127761	0.423284	0.663271
TRINITY_DN35968_c2_g1_i1	-2.05602	4.29724	6.28381	4.15837	19.6607	77.9138	2.16564e-07	0.000118993	3.55194e-11	0.000129027	0.0286736	4.58777e-08
TRINITY_DN33532_c0_g3_i2	1.48235	-0.00538623	-1.54189	2.79404	1.00374	2.91175	2.35368e-07	0.973774	1.49583e-08	0.000139236	1	1.07892e-05
TRINITY_DN16244_c0_g2_i1	-2.5772	-0.486765	2.03787	5.96779	1.4013	4.1064	2.38647e-07	0.0443888	7.24744e-06	0.000140163	0.671357	0.00215302
TRINITY_DN8426_c0_g2_i1	-2.33181	-0.445104	1.83267	5.03435	1.36141	3.56194	2.40296e-07	0.0638587	1.30096e-05	0.000140163	0.763489	0.00342018
TRINITY_DN35626_c0_g1_i4	-8.08905	-0.965822	7.08508	272.299	1.95318	135.776	2.49619e-07	0.517884	0.0109477	0.00014459	1	0.287425
TRINITY_DN35927_c2_g9_i1	-1.35388	-1.75432	-0.464094	2.55598	3.37366	1.37945	2.548e-07	9.22329e-10	0.104142	0.000146574	2.54515e-06	0.730706
TRINITY_DN22371_c0_g2_i1	1.95775	-0.524559	-2.53338	3.88456	1.43849	5.78926	2.58174e-07	0.293169	9.42525e-12	0.000147497	1	1.41887e-08
TRINITY_DN34480_c0_g1_i3	-2.18245	4.4189	6.53088	4.53924	21.3906	92.4677	2.65869e-07	0.000120888	5.20376e-11	0.00015086	0.028967	6.44124e-08
TRINITY_DN30728_c0_g1_i1	-8.03467	-0.243103	7.75504	262.226	1.18354	216.023	3.28154e-07	0.737605	7.89001e-07	0.000184944	1	0.000353353
TRINITY_DN32663_c0_g1_i2	-1.60042	-0.841005	0.70058	3.03232	1.7913	1.62516	3.31121e-07	0.00270455	0.0304135	0.000185364	0.196039	0.457494
TRINITY_DN14349_c0_g1_i2	-1.81773	-0.445038	1.31744	3.52525	1.36135	2.49224	4.19187e-07	0.121897	0.000134161	0.000233099	0.940978	0.0204388
TRINITY_DN23340_c0_g1_i2	2.42965	0.850933	-1.63192	5.38763	1.80367	3.09926	4.48779e-07	0.125289	1.18929e-06	0.000247902	0.940978	0.00049529
TRINITY_DN35925_c0_g1_i3	-5.4453	-1.25798	4.1735	43.571	2.39161	18.0447	4.66125e-07	0.238883	0.010088	0.000255789	1	0.275703
TRINITY_DN31714_c0_g1_i6	8.41338	8.31572	-0.138272	340.94	318.626	1.10059	4.70854e-07	1.90438e-07	0.819479	0.000256695	0.0002168	1
TRINITY_DN26300_c0_g1_i2	-2.49413	-0.807661	1.62474	5.63389	1.75037	3.08387	4.93e-07	0.0653692	0.00113923	0.000267024	0.772378	0.0816819
TRINITY_DN60618_c0_g1_i1	-1.50714	-0.248699	1.20337	2.84246	1.18814	2.30277	5.86383e-07	0.315068	2.3582e-05	0.000315554	1	0.0054589
TRINITY_DN21669_c0_g1_i4	8.58424	5.75666	-2.83035	383.807	54.0663	7.11247	5.97186e-07	0.0353308	0.00128628	0.000319307	0.619442	0.0879108
TRINITY_DN43107_c0_g1_i1	-8.0131	-4.33183	3.69829	258.335	20.1378	12.9806	6.10273e-07	0.000155239	0.145672	0.000324226	0.033877	0.807327
TRINITY_DN31590_c0_g1_i2	-1.68949	-3.27666	-1.64123	3.22542	9.69111	3.11932	6.51977e-07	0.000242462	0.0578915	0.00034419	0.045511	0.591113
TRINITY_DN3543_c0_g1_i1	2.18299	0.055185	-2.18321	4.54095	1.03899	4.54164	6.63239e-07	0.952472	2.00841e-08	0.000347934	1	1.35601e-05
TRINITY_DN31323_c0_g1_i2	2.49561	1.16558	-1.40156	5.63965	2.24323	2.64187	6.7681e-07	0.400377	0.178144	0.000352834	1	0.857034
TRINITY_DN18597_c0_g1_i1	-1.87174	-0.103327	1.70653	3.65974	1.07425	3.26374	6.96802e-07	0.760154	2.65575e-06	0.000360999	1	0.000975379
TRINITY_DN35079_c0_g1_i1	2.19283	1.43636	-0.819021	4.57202	2.70638	1.76421	7.64341e-07	0.00241835	0.0441604	0.000393546	0.184875	0.530716
TRINITY_DN22029_c0_g1_i1	-1.61024	-1.2248	0.324852	3.05302	2.33724	1.25254	7.74339e-07	0.000129419	0.343509	0.000396248	0.0299217	0.974384
TRINITY_DN30073_c0_g4_i1	2.05429	-0.193195	-2.30127	4.15339	1.14329	4.92891	8.21573e-07	0.697934	7.44382e-10	0.000417855	1	6.83925e-07
TRINITY_DN41084_c0_g1_i1	-2.57228	-0.575239	1.93881	5.94747	1.48992	3.8339	8.32582e-07	0.179637	8.03045e-05	0.000420888	1	0.0140042
TRINITY_DN35970_c0_g1_i1	-2.27243	4.2451	6.44801	4.83137	18.9628	87.306	8.54769e-07	0.000173778	2.32033e-11	0.000429501	0.0367053	3.08645e-08
TRINITY_DN18701_c0_g3_i1	3.95708	-1.82874	-5.8338	15.531	3.55227	57.0359	8.61234e-07	0.184515	2.96458e-13	0.000430158	1	6.00475e-10
TRINITY_DN26944_c0_g1_i2	8.29551	7.27524	-1.06731	314.193	154.905	2.09552	9.25447e-07	0.00546227	0.280217	0.000459479	0.276651	0.960714
TRINITY_DN32216_c0_g1_i1	8.2364	6.96967	-1.32299	301.58	125.337	2.50184	1.0007e-06	0.010844	0.192199	0.000493903	0.38911	0.877795
TRINITY_DN31765_c0_g1_i1	-2.68702	-0.706526	1.92443	6.43983	1.63187	3.79586	1.02398e-06	0.0189256	0.000293784	0.000502418	0.483903	0.0354298
TRINITY_DN35968_c2_g3_i1	-1.87982	4.04724	5.85703	3.68028	16.5325	57.9619	1.14107e-06	0.000139798	9.1816e-11	0.000556593	0.0315538	1.07669e-07
TRINITY_DN35970_c0_g2_i1	-2.19865	4.15184	6.28124	4.59049	17.7758	77.7754	1.20438e-06	0.000144824	1.59429e-11	0.000584062	0.0321787	2.15282e-08
TRINITY_DN28344_c0_g1_i1	-1.72724	-0.630407	1.04017	3.31095	1.548	2.05646	1.28551e-06	0.0170032	0.00250459	0.000619804	0.465745	0.130875
TRINITY_DN12566_c0_g1_i2	-10.5985	-2.6595	7.87579	1550.43	6.31812	234.881	1.31137e-06	0.147724	0.00213311	0.000628636	0.994329	0.118451
TRINITY_DN31898_c0_g1_i1	-1.99783	-0.312903	1.62522	3.994	1.2422	3.0849	1.32041e-06	0.357366	3.26828e-05	0.000629353	1	0.0070698
TRINITY_DN34781_c0_g1_i5	8.5998	9.16522	0.52367	387.968	574.123	1.43761	1.32902e-06	1.44476e-10	0.412491	0.000629859	5.1496e-07	1
TRINITY_DN36001_c0_g2_i2	-2.99412	-0.739405	2.20968	7.96749	1.66949	4.62571	1.43653e-06	0.0152553	0.000221622	0.000676962	0.443618	0.0287922
TRINITY_DN33117_c0_g1_i3	2.82658	-0.228494	-3.10416	7.09392	1.17161	8.59893	1.62259e-06	0.737687	5.08208e-11	0.000759235	1	6.37922e-08
TRINITY_DN30769_c0_g1_i3	1.66284	-0.310292	-2.03688	3.1664	1.23996	4.10358	1.62932e-06	0.464564	8.25494e-09	0.000759235	1	6.45348e-06
TRINITY_DN31733_c0_g1_i2	8.22993	6.59899	-1.63943	300.232	96.9377	3.11543	1.64898e-06	0.0106413	0.0675565	0.00076413	0.38599	0.628336
TRINITY_DN30909_c0_g1_i2	3.47939	-0.638365	-4.15727	11.1532	1.55656	17.8429	1.67607e-06	0.553506	5.0127e-07	0.000772389	1	0.00023751
TRINITY_DN30769_c0_g1_i5	1.33719	-0.0129233	-1.40783	2.52658	1.009	2.65338	1.93464e-06	0.958028	3.03385e-08	0.00088665	1	1.93131e-05
TRINITY_DN33968_c1_g1_i3	-1.31558	-0.486867	0.773294	2.48903	1.4014	1.70917	2.0014e-06	0.0443308	0.00312294	0.000912232	0.671357	0.14695
TRINITY_DN25390_c0_g1_i1	-1.53873	-0.611608	0.868678	2.90539	1.52796	1.82599	2.04892e-06	0.025611	0.00524752	0.000928819	0.546488	0.194376
TRINITY_DN17347_c0_g1_i1	-1.55907	-0.323378	1.17919	2.94664	1.25126	2.2645	2.12197e-06	0.162967	0.000132347	0.000954786	1	0.0202316
TRINITY_DN11415_c0_g1_i1	-1.45781	-0.681364	0.715625	2.74692	1.60365	1.64219	2.1291e-06	0.025592	0.0231943	0.000954786	0.546354	0.406225
TRINITY_DN10681_c0_g1_i1	-2.72215	-0.738689	1.93042	6.59855	1.66866	3.81165	2.32376e-06	0.0241319	0.000561626	0.00103651	0.534082	0.0528545
TRINITY_DN28233_c1_g1_i1	-2.97385	0.00373066	2.91841	7.85629	1.00259	7.56012	2.4304e-06	1	1.17871e-07	0.00107831	1	6.48452e-05
TRINITY_DN19004_c0_g1_i1	-2.29169	-0.136084	2.09794	4.89629	1.09892	4.28098	2.48408e-06	0.743429	3.0222e-06	0.00109629	1	0.00107309
TRINITY_DN35828_c0_g1_i9	8.007	0	-8.02567	257.245	0	260.596	2.77292e-06	0	1.50116e-08	0.00121732	0	1.07892e-05
TRINITY_DN16911_c0_g1_i1	-2.27606	-0.398755	1.82555	4.84353	1.31837	3.54442	2.79168e-06	0.127831	7.52691e-05	0.00121915	0.946764	0.0133895
TRINITY_DN33856_c0_g1_i2	-1.292	-0.896997	0.33824	2.44867	1.86219	1.26421	2.92069e-06	0.000428718	0.218792	0.00126884	0.0680413	0.902825
TRINITY_DN31812_c0_g1_i2	-7.7205	-1.56136	6.08356	210.912	2.95133	67.8165	2.98702e-06	0.254082	0.0221054	0.00129094	1	0.397914
TRINITY_DN33255_c0_g4_i2	-1.40966	-0.52396	0.829606	2.65674	1.4379	1.7772	3.03727e-06	0.0295075	0.00229731	0.00130589	0.58014	0.12371
TRINITY_DN32826_c2_g1_i1	-1.503	-0.258884	1.188	2.83431	1.19655	2.27836	3.42665e-06	0.277779	6.97361e-05	0.00146575	1	0.0126579
TRINITY_DN25143_c0_g1_i4	8.43732	8.22822	-0.264319	346.645	299.876	1.20107	3.59023e-06	4.60814e-05	0.76634	0.00152788	0.0153984	1
TRINITY_DN35335_c0_g1_i3	5.468	4.83651	-0.695079	44.2621	28.5716	1.61897	3.98838e-06	9.26076e-07	0.282994	0.00168806	0.000842769	0.960714
TRINITY_DN27468_c0_g1_i5	-5.18108	-1.9849	3.12901	36.2794	3.95835	8.74832	4.0208e-06	0.00374247	0.00756149	0.00168806	0.230321	0.23897
TRINITY_DN40916_c0_g1_i1	-2.40762	-0.238128	2.11418	5.30598	1.17946	4.32944	4.02733e-06	0.575579	6.25514e-05	0.00168806	1	0.0117116
TRINITY_DN29423_c0_g1_i1	-7.63064	-1.71493	5.91094	198.177	3.28281	60.1686	4.06058e-06	0.125356	0.00883395	0.00169349	0.940978	0.257877
TRINITY_DN27010_c1_g1_i4	-2.0807	-0.832495	1.19376	4.23011	1.78076	2.28748	4.24414e-06	0.00219835	0.00582538	0.00176123	0.177561	0.206469
TRINITY_DN29098_c0_g2_i1	-7.71124	-3.95923	3.6303	209.563	15.5542	12.3831	4.54171e-06	0.00110181	0.308525	0.00187539	0.118856	0.960714
TRINITY_DN3338_c0_g3_i1	8.01378	6.02762	-1.99374	258.457	65.2373	3.98267	4.62281e-06	0.0241835	0.0253616	0.00189947	0.534082	0.421129
TRINITY_DN34480_c0_g1_i4	-2.10392	3.90457	5.93776	4.29875	14.9759	61.2979	4.77255e-06	0.000376545	2.65752e-10	0.00195139	0.062546	2.81957e-07
TRINITY_DN35927_c2_g8_i2	-1.37961	-1.60683	-0.288351	2.60198	3.04582	1.22124	4.89136e-06	1.90582e-07	0.356062	0.00199021	0.0002168	0.98963
TRINITY_DN33313_c0_g1_i1	8.78433	9.69264	0.872487	440.905	827.512	1.83082	4.92886e-06	8.4365e-14	0.207757	0.00199573	5.55147e-10	0.892032
TRINITY_DN41100_c0_g1_i1	-1.42098	-0.527923	0.837458	2.67768	1.44185	1.7869	4.96489e-06	0.0299003	0.0039831	0.00200061	0.582838	0.16705
TRINITY_DN20238_c0_g1_i2	-1.95876	-0.701362	1.19797	3.88727	1.62604	2.29417	5.44159e-06	0.0754631	0.00658052	0.00217231	0.812394	0.221038
TRINITY_DN18769_c0_g1_i1	-1.43627	0.0604728	1.43957	2.7062	1.04281	2.71239	5.44309e-06	0.828609	1.3759e-06	0.00217231	1	0.00056249
TRINITY_DN8991_c0_g2_i1	7.8318	7.19901	-0.637911	227.827	146.932	1.55607	5.56161e-06	0.00557439	0.520388	0.00220905	0.279825	1
TRINITY_DN34757_c0_g1_i15	8.5012	6.65798	-1.89907	362.34	100.984	3.72972	6.08227e-06	0.024158	0.0991289	0.00239316	0.534082	0.719292
TRINITY_DN25550_c0_g1_i1	-3.69269	-1.74374	1.87946	12.9303	3.34903	3.67938	6.08252e-06	0.0213474	0.0512856	0.00239316	0.508996	0.564617
TRINITY_DN34605_c0_g1_i2	1.69357	-0.673819	-2.42817	3.23457	1.59529	5.38209	6.16727e-06	0.138461	5.87865e-12	0.00241511	0.974202	9.52576e-09
TRINITY_DN31523_c0_g1_i2	2.41596	0.716297	-1.7356	5.33674	1.64296	3.33018	6.22512e-06	0.17337	0.00176732	0.0024183	1	0.107558
TRINITY_DN34694_c0_g1_i2	1.4773	-0.464865	-1.99893	2.78428	1.38019	3.99704	6.23339e-06	0.121045	4.30035e-12	0.0024183	0.9386	7.3703e-09
TRINITY_DN31219_c0_g2_i2	-2.40988	-1.04001	1.30425	5.31429	2.05624	2.46956	6.43712e-06	0.306351	0.215588	0.00248577	1	0.901805
TRINITY_DN18176_c0_g1_i1	-2.52023	-0.543154	1.92522	5.73672	1.45716	3.79796	6.64304e-06	0.0726734	0.00034758	0.00255347	0.803941	0.0396042
TRINITY_DN22849_c0_g1_i2	-1.364	-0.0868936	1.22256	2.57398	1.06208	2.33361	6.6969e-06	0.713116	1.49399e-05	0.00256236	1	0.00379336
TRINITY_DN22861_c0_g1_i2	-2.48501	-0.474327	1.95765	5.59837	1.38927	3.88428	6.84584e-06	0.0633824	0.000108942	0.00260739	0.762385	0.0176209
TRINITY_DN35565_c0_g1_i3	1.54941	0.198193	-1.40754	2.92697	1.14726	2.65284	7.0994e-06	0.570588	5.33672e-06	0.00267986	1	0.00167515
TRINITY_DN36053_c0_g2_i5	-1.89422	4.26279	6.08571	3.71722	19.1968	67.9176	7.10037e-06	0.000151033	4.4148e-10	0.00267986	0.0332134	4.32369e-07
TRINITY_DN33045_c0_g1_i2	2.83494	-1.16429	-4.03521	7.13514	2.24122	16.3953	7.22651e-06	0.3901	8.97643e-05	0.00271518	1	0.0152009
TRINITY_DN21362_c0_g1_i1	-1.86563	-1.11288	0.69537	3.64428	2.16277	1.6193	7.68628e-06	0.00088719	0.0950804	0.00287498	0.105702	0.70713
TRINITY_DN33386_c0_g1_i8	-8.1147	-8.0987	0	277.185	274.128	0	8.23337e-06	7.6703e-06	0	0.00305414	0.00439159	0
TRINITY_DN35927_c2_g10_i4	-1.22282	-1.76203	-0.601086	2.33402	3.39176	1.51686	8.23849e-06	9.58352e-10	0.0423064	0.00305414	2.56191e-06	0.52309
TRINITY_DN36053_c0_g3_i1	-2.0288	3.9136	5.87181	4.08065	15.0699	58.5588	8.37314e-06	0.000299307	2.50577e-10	0.00309032	0.0531206	2.72341e-07
TRINITY_DN34824_c0_g1_i1	-7.49507	-7.47868	0	180.402	178.364	0	8.66392e-06	6.74787e-06	0	0.00318355	0.0039537	0
TRINITY_DN16842_c0_g1_i2	-7.66533	-0.978653	6.64408	202.999	1.97062	100.016	8.98027e-06	0.354515	0.00126133	0.00328532	1	0.0868015
TRINITY_DN39464_c0_g1_i1	-1.28068	-1.65023	-0.432398	2.42953	3.13884	1.34947	9.11299e-06	1.3475e-07	0.143956	0.00331932	0.000164672	0.807327
TRINITY_DN26825_c0_g1_i1	-1.65703	-0.908925	0.692988	3.15366	1.87765	1.61663	9.22138e-06	5.09743e-05	0.0425545	0.00334419	0.0163316	0.523137
TRINITY_DN23161_c0_g2_i2	-7.70764	-0.143289	7.52649	209.04	1.10442	184.373	9.73644e-06	0.860619	1.15805e-06	0.0035157	1	0.000484543
TRINITY_DN28998_c0_g1_i1	5.19507	6.51819	1.24984	36.6328	91.6582	2.37816	9.89299e-06	8.78259e-06	0.120967	0.00355683	0.00472514	0.764814
TRINITY_DN36053_c0_g5_i1	-3.01699	2.07349	5.02132	8.09476	4.20905	32.4763	1.01288e-05	0.0113611	6.18784e-12	0.00362599	0.396519	9.84772e-09
TRINITY_DN33434_c0_g2_i3	-2.30855	-0.116785	2.13984	4.95383	1.08432	4.40713	1.02114e-05	0.704784	1.51302e-05	0.00363993	1	0.00381993
TRINITY_DN22485_c1_g1_i1	-1.38681	-0.063779	1.26831	2.615	1.0452	2.40879	1.02988e-05	0.80078	2.274e-05	0.00365547	1	0.00530531
TRINITY_DN35851_c0_g1_i16	-6.18899	-0.8579	5.24205	72.9579	1.8124	37.8455	1.04859e-05	0.473759	0.00404657	0.00370612	1	0.168601
TRINITY_DN34325_c0_g1_i3	-2.62859	-3.23954	-0.647768	6.18422	9.44491	1.56674	1.06245e-05	0.0030741	0.531172	0.00373923	0.207882	1
TRINITY_DN24784_c0_g1_i1	-2.39289	-0.500637	1.84211	5.25208	1.41484	3.58534	1.08239e-05	0.190644	0.000900487	0.00379341	1	0.0705069
TRINITY_DN16238_c0_g1_i1	-1.40996	-0.613683	0.742029	2.6573	1.53016	1.67253	1.13757e-05	0.0137706	0.0161052	0.00397011	0.42686	0.343973
TRINITY_DN32234_c0_g2_i7	-8.25149	-1.05484	7.12969	304.752	2.07749	140.04	1.1884e-05	0.447472	0.00303846	0.00413023	1	0.145733
TRINITY_DN33945_c0_g1_i1	-1.11001	-0.935898	0.115676	2.15847	1.91308	1.08348	1.20248e-05	5.4616e-05	0.634714	0.00416182	0.0172861	1
TRINITY_DN30427_c0_g1_i4	8.22947	8.07824	-0.199886	300.136	270.267	1.14861	1.24828e-05	1.39891e-06	0.795999	0.00430249	0.00115066	1
TRINITY_DN16541_c0_g1_i2	8.8007	6.30174	-2.55356	445.939	78.8886	5.87082	1.2584e-05	0.0603631	0.0579056	0.00430433	0.748579	0.591113
TRINITY_DN31881_c0_g1_i1	-1.09376	-0.644693	0.390171	2.1343	1.56341	1.31055	1.25913e-05	0.00798247	0.104647	0.00430433	0.333449	0.732588
TRINITY_DN30759_c0_g1_i3	7.95112	8.18073	0.203519	247.471	290.165	1.1515	1.29568e-05	3.2905e-06	0.797222	0.0044112	0.00225186	1
TRINITY_DN14833_c0_g1_i1	-7.5326	-7.51565	0	185.156	182.994	0	1.36997e-05	1.13621e-05	0	0.00464514	0.00566288	0
TRINITY_DN19711_c0_g1_i1	-1.10641	-0.485143	0.569354	2.15309	1.39972	1.48386	1.38976e-05	0.069691	0.0247511	0.00468556	0.791397	0.416737
TRINITY_DN26832_c0_g1_i1	-1.66631	-0.535197	1.07461	3.17401	1.44914	2.10615	1.39421e-05	0.0306623	0.00290759	0.00468556	0.588997	0.142614
TRINITY_DN31651_c0_g1_i1	-3.88253	-1.19436	2.64463	14.7488	2.28844	6.25337	1.39874e-05	0.117563	0.00599931	0.00468556	0.934471	0.209852
TRINITY_DN33481_c0_g1_i5	4.64054	3.62073	-1.08073	24.9427	12.3013	2.11511	1.48685e-05	0.105531	0.404173	0.00495964	0.903308	1
TRINITY_DN50902_c0_g3_i1	2.94773	1.81085	-1.19155	7.71536	3.50849	2.28399	1.49245e-05	0.167257	0.176275	0.00495964	1	0.853866
TRINITY_DN30863_c1_g1_i3	1.44796	0.426261	-1.08628	2.72822	1.34375	2.12325	1.53724e-05	0.445935	0.0206224	0.0050848	1	0.385456
TRINITY_DN12623_c0_g1_i1	-1.67245	-0.615406	1.0029	3.18756	1.53199	2.00402	1.54231e-05	0.0136551	0.00628507	0.0050848	0.426204	0.215636
TRINITY_DN31024_c0_g1_i1	7.84008	8.2987	0.424335	229.139	314.889	1.34195	1.62294e-05	1.97505e-07	0.496601	0.00532958	0.00021942	1
TRINITY_DN35985_c0_g1_i7	4.73312	5.12809	0.318379	26.5957	34.9711	1.24693	1.63036e-05	8.2187e-05	0.6966	0.00533065	0.0227006	1
TRINITY_DN20364_c0_g1_i1	-1.27901	-0.365301	0.860332	2.42673	1.28815	1.81546	1.64066e-05	0.143924	0.00241368	0.00533065	0.987951	0.128043
TRINITY_DN33765_c0_g1_i2	-7.37221	-1.19693	6.14971	165.675	2.29252	70.9982	1.64244e-05	0.345469	0.00872843	0.00533065	1	0.256804
TRINITY_DN30898_c0_g1_i1	1.3518	-0.0869758	-1.49818	2.5523	1.06214	2.82486	1.71147e-05	0.763273	8.78158e-07	0.00553317	1	0.000385533
TRINITY_DN25143_c0_g1_i2	7.84676	8.71806	0.850629	230.202	421.111	1.80329	1.73523e-05	2.04127e-06	0.271737	0.00558831	0.0015591	0.957479
TRINITY_DN35243_c0_g1_i1	-7.65612	0.370612	7.98452	201.708	1.2929	253.269	1.79331e-05	0.721289	4.32152e-07	0.00575314	1	0.000207066
TRINITY_DN36053_c0_g6_i1	-2.38933	2.229	4.55072	5.23913	4.68809	23.437	1.83579e-05	0.0047487	3.0053e-10	0.00586685	0.256573	3.11439e-07
TRINITY_DN33805_c0_g1_i1	-7.75367	0.163761	7.87338	215.818	1.1202	234.49	1.84572e-05	0.896402	8.07474e-07	0.00587607	1	0.000359819
TRINITY_DN34388_c0_g1_i7	-1.47785	-0.356465	1.06286	2.78533	1.28028	2.08907	1.91888e-05	0.234339	0.000726027	0.00608577	1	0.0619292
TRINITY_DN34832_c0_g1_i10	-1.45868	-0.576434	0.814205	2.74856	1.49116	1.75833	1.92941e-05	0.1843	0.0651348	0.00609599	1	0.618649
TRINITY_DN34093_c0_g1_i6	7.64808	6.82015	-0.866765	200.587	112.998	1.82357	1.98195e-05	0.000685325	0.203642	0.00623835	0.090332	0.888294
TRINITY_DN34232_c0_g1_i3	-7.46779	0.138955	7.55055	177.023	1.10111	187.474	2.06992e-05	0.975936	0.000285003	0.00649075	1	0.0344642
TRINITY_DN49304_c0_g1_i1	-2.47266	-0.949588	1.46805	5.55067	1.93132	2.76647	2.118e-05	0.00352583	0.0089048	0.00661666	0.22418	0.258506
TRINITY_DN33275_c1_g1_i7	-1.39137	-0.929135	0.404722	2.62328	1.90413	1.32383	2.19618e-05	0.000123274	0.194804	0.00683529	0.0291142	0.8798
TRINITY_DN33059_c0_g2_i3	4.97503	5.24272	0.201043	31.451	37.863	1.14953	2.24701e-05	0.00340531	0.8569	0.00696748	0.220518	1
TRINITY_DN24340_c1_g1_i1	-1.89433	-0.454591	1.38719	3.7175	1.37039	2.61569	2.29661e-05	0.0916209	0.0012622	0.00707019	0.860237	0.0868015
TRINITY_DN32291_c0_g1_i1	-1.5926	-0.793624	0.744531	3.01592	1.73342	1.67543	2.29709e-05	0.000999314	0.0362097	0.00707019	0.113526	0.490611
TRINITY_DN242_c0_g2_i1	-1.69478	-0.00208174	1.63245	3.23728	1.00144	3.1004	2.34972e-05	0.990384	9.61609e-06	0.00720562	1	0.00269499
TRINITY_DN27310_c0_g3_i3	3.35785	0.256058	-3.12938	10.2521	1.19421	8.75061	2.3648e-05	0.881956	1.06142e-06	0.00722529	1	0.000455005
TRINITY_DN34388_c0_g1_i5	-1.19972	-0.367809	0.778167	2.29695	1.29039	1.71495	2.3735e-05	0.150103	0.00631348	0.00722539	0.998163	0.215996
TRINITY_DN46232_c0_g1_i1	6.4875	0	-8.80851	89.7289	0	448.359	2.4428e-05	0	3.13166e-08	0.00740931	0	1.96549e-05
TRINITY_DN35662_c0_g1_i4	7.75776	4.28796	-3.46662	216.43	19.5347	11.055	2.47533e-05	0.288762	0.00131972	0.00748079	1	0.0890355
TRINITY_DN35533_c1_g1_i8	-7.29272	-3.8213	3.34948	156.794	14.136	10.1928	2.62125e-05	0.00162019	0.421315	0.00786751	0.148966	1
TRINITY_DN32549_c0_g1_i2	-7.29272	-0.810176	6.43312	156.794	1.75343	86.4094	2.62216e-05	0.435193	0.00201138	0.00786751	1	0.11513
TRINITY_DN17521_c0_g2_i1	7.72124	6.86706	-0.923358	211.02	116.732	1.89652	2.63764e-05	0.00262213	0.296469	0.00788559	0.192961	0.960714
TRINITY_DN35673_c0_g1_i2	-2.8615	-0.574254	2.23237	7.2677	1.48891	4.69906	2.74235e-05	0.106858	0.000737016	0.00816937	0.907305	0.062497
TRINITY_DN21047_c0_g1_i1	-3.72468	-1.65731	2.00531	13.2203	3.15428	4.01474	2.77969e-05	0.0050438	0.0367991	0.00824236	0.263733	0.494587
TRINITY_DN30969_c0_g1_i1	-1.86671	0.0483924	1.86022	3.64699	1.03411	3.63063	2.78662e-05	0.911788	6.12925e-06	0.00824236	1	0.00188362
TRINITY_DN33441_c0_g1_i1	2.00729	1.59678	-0.466792	4.02026	3.02468	1.38203	2.81959e-05	0.00106501	0.164902	0.00831041	0.116794	0.833788
TRINITY_DN36053_c0_g2_i4	-2.40875	3.63002	5.96722	5.31015	12.3807	62.5622	2.85213e-05	0.000299309	1.27307e-09	0.00835742	0.0531206	1.11234e-06
TRINITY_DN35277_c0_g2_i10	7.64686	6.0652	-1.60883	200.417	66.9588	3.05003	2.85557e-05	0.0266574	0.0891785	0.00835742	0.555083	0.692013
TRINITY_DN34637_c0_g1_i2	-7.39987	-0.781036	6.5861	168.882	1.71836	96.0755	2.88526e-05	0.615104	0.0192928	0.00841478	1	0.373061
TRINITY_DN23350_c0_g1_i1	-1.18197	-0.429514	0.690904	2.26887	1.34678	1.6143	2.90195e-05	0.122973	0.0121554	0.00843395	0.940978	0.301758
TRINITY_DN17116_c0_g1_i1	-1.98276	-0.880091	1.05824	3.95249	1.84049	2.08239	2.97642e-05	0.0307056	0.040286	0.00862035	0.589471	0.512032
TRINITY_DN26457_c0_g1_i1	-1.89025	-0.811217	1.0252	3.707	1.75469	2.03524	3.00996e-05	0.00666066	0.0206128	0.00868733	0.303397	0.385369
TRINITY_DN35513_c5_g1_i2	-1.76355	-0.16736	1.54146	3.39532	1.123	2.91088	3.08498e-05	0.566267	0.000138905	0.00887313	1	0.0209822
TRINITY_DN28570_c0_g2_i1	-2.39583	-0.811222	1.52372	5.26281	1.7547	2.87531	3.15064e-05	0.110186	0.00628765	0.00903087	0.912212	0.215636
TRINITY_DN34383_c0_g1_i4	6.36324	5.50659	-0.844167	82.3241	45.4621	1.79523	3.17571e-05	0.0179482	0.512268	0.00907154	0.473118	1
TRINITY_DN50878_c0_g1_i1	-2.01076	-0.927456	1.03176	4.02996	1.90192	2.04452	3.31669e-05	9.44178e-05	0.0195811	0.00944193	0.0248259	0.375777
TRINITY_DN33275_c1_g1_i6	-1.89702	-1.19954	0.645052	3.72442	2.29666	1.5638	3.41335e-05	0.00207919	0.181025	0.00968405	0.172014	0.862161
TRINITY_DN35927_c2_g8_i3	-1.08732	-1.13503	-0.110608	2.12478	2.19624	1.07968	3.44586e-05	6.60297e-05	0.660331	0.00973852	0.0196127	1
TRINITY_DN23371_c0_g1_i1	-1.05087	-0.698228	0.300823	2.07177	1.62251	1.23185	3.4559e-05	0.00805893	0.235869	0.00973852	0.334657	0.913548
TRINITY_DN40851_c0_g1_i1	-1.54322	-0.265011	1.22585	2.91444	1.20164	2.33893	3.52277e-05	0.301147	0.000661317	0.00989353	1	0.0583543
TRINITY_DN36169_c0_g1_i1	-1.31875	-0.523044	0.741196	2.49451	1.43698	1.67156	3.56785e-05	0.0282039	0.0137094	0.00996791	0.571663	0.317754
TRINITY_DN33938_c0_g1_i2	-2.3356	-1.05632	1.22588	5.04761	2.07962	2.33898	3.58751e-05	0.000752574	0.0233977	0.00996791	0.0959996	0.407834
TRINITY_DN51059_c0_g1_i1	3.39513	1.99536	-1.48094	10.5205	3.98715	2.7913	3.58851e-05	0.0600375	0.0256421	0.00996791	0.747025	0.42312
TRINITY_DN34510_c0_g1_i5	7.5479	6.46021	-1.09763	187.13	88.0477	2.14003	3.59706e-05	0.0135191	0.233747	0.00996791	0.425114	0.911331
TRINITY_DN20554_c135_g1_i1	-4.53551	-6.18857	-1.6995	23.1913	72.9366	3.24789	3.65934e-05	1.78382e-06	0.178583	0.0101069	0.00139996	0.857893
TRINITY_DN28859_c0_g1_i1	-6.28259	-3.32065	2.89776	77.848	9.99114	7.45266	3.74045e-05	0.00318426	0.0690882	0.0102968	0.211484	0.633213
TRINITY_DN28854_c0_g1_i1	-1.86549	-0.983451	0.824801	3.64391	1.97719	1.77129	3.7598e-05	0.0053063	0.0523162	0.0103161	0.272118	0.569577
TRINITY_DN34630_c0_g1_i3	7.53653	6.26407	-1.26487	185.662	76.8552	2.40305	3.78729e-05	0.0634116	0.323556	0.0103574	0.762385	0.961581
TRINITY_DN18959_c0_g1_i1	-1.08319	-0.481621	0.54679	2.11872	1.39631	1.46083	3.84633e-05	0.0326151	0.0310296	0.0104845	0.604654	0.460868
TRINITY_DN23785_c0_g1_i1	-1.6928	-0.697189	0.93891	3.23284	1.62134	1.91708	3.89627e-05	0.0125241	0.0169609	0.010586	0.410363	0.351937
TRINITY_DN25143_c0_g1_i5	7.91642	7.42472	-0.542995	241.59	171.816	1.45699	3.95488e-05	0.000354443	0.524244	0.010686	0.0594519	1
TRINITY_DN31666_c0_g1_i1	-7.18727	-0.541154	6.57506	145.742	1.45514	95.3436	3.95867e-05	0.671303	0.011825	0.010686	1	0.298299
TRINITY_DN34817_c0_g2_i5	-1.36556	-0.687191	0.622977	2.57676	1.61014	1.54005	4.00448e-05	0.0132714	0.0549061	0.0107748	0.42157	0.579241
TRINITY_DN30517_c0_g1_i5	-1.27768	-0.994967	0.229852	2.42449	1.99304	1.17271	4.11956e-05	0.00204925	0.497148	0.0110488	0.170709	1
TRINITY_DN29779_c0_g1_i1	7.46189	7.21489	-0.262457	176.3	148.558	1.19952	4.20458e-05	0.00377521	0.777469	0.0112407	0.231172	1
TRINITY_DN29454_c0_g1_i8	-5.71195	-1.88612	3.77044	52.4166	3.6964	13.6464	4.23053e-05	0.065252	0.0364287	0.0112739	0.772049	0.492731
TRINITY_DN32022_c0_g1_i3	-7.22423	-7.20737	0	149.523	147.787	0	4.30509e-05	3.12483e-05	0	0.0114361	0.0118805	0
TRINITY_DN33275_c1_g1_i1	-1.33916	-0.819594	0.462953	2.53003	1.76491	1.37836	4.39059e-05	0.000903321	0.1406	0.0116261	0.107027	0.805519
TRINITY_DN34480_c0_g1_i6	-2.31771	3.61016	5.85736	4.98541	12.2115	57.9751	4.51898e-05	0.000199157	1.19795e-11	0.0119156	0.0396152	1.72199e-08
TRINITY_DN16873_c0_g4_i1	-1.17699	-0.495382	0.626654	2.26104	1.40969	1.54398	4.52849e-05	0.0500186	0.0219946	0.0119156	0.70102	0.397
TRINITY_DN34396_c0_g1_i2	5.1437	-3.0946	-8.30559	35.3515	8.54218	316.397	4.75807e-05	0.414439	9.95741e-09	0.0124804	1	7.65021e-06
TRINITY_DN31788_c1_g1_i4	-9.11843	-2.09057	6.96534	555.802	4.25916	124.961	4.81256e-05	0.236823	0.00704195	0.0125837	1	0.229887
TRINITY_DN33993_c0_g1_i2	-1.17462	-0.309391	0.808061	2.25734	1.23918	1.75086	4.89411e-05	0.203076	0.00195666	0.012757	1	0.11353
TRINITY_DN16705_c0_g1_i4	-7.36933	1.2008	8.53255	165.344	2.29868	370.299	4.95998e-05	0.155473	8.71179e-10	0.0128884	1	7.84254e-07
TRINITY_DN1660_c0_g2_i1	7.42929	4.72525	-2.70343	172.361	26.4509	6.51347	5.00776e-05	0.166774	0.00701419	0.0129721	1	0.229149
TRINITY_DN36129_c2_g1_i1	-1.01974	-0.136443	0.822521	2.02756	1.09919	1.76849	5.03038e-05	0.562789	0.000687126	0.0129904	1	0.0598613
TRINITY_DN35622_c1_g1_i3	8.07474	0	-8.08953	269.612	0	272.389	5.18222e-05	0	7.29752e-07	0.0133412	0	0.000328469
TRINITY_DN25906_c0_g1_i1	-1.99597	-0.449592	1.49472	3.98885	1.36565	2.81809	5.24444e-05	0.0979057	0.00142427	0.0134598	0.876986	0.0942342
TRINITY_DN23362_c0_g1_i3	-3.9105	-8.78744	-4.90421	15.0376	441.859	29.9444	5.35991e-05	6.11237e-10	0.0361528	0.013714	1.80302e-06	0.490338
TRINITY_DN33326_c0_g1_i1	-1.69534	-0.617656	1.0214	3.23853	1.53438	2.02989	5.69221e-05	0.0425444	0.0112817	0.0145197	0.66437	0.291918
TRINITY_DN33067_c0_g1_i1	7.89053	3.91217	-3.97632	237.293	15.0549	15.7395	5.80675e-05	0.402962	0.000706353	0.0147667	1	0.0609406
TRINITY_DN35715_c0_g1_i9	-1.07826	-0.567214	0.45006	2.11149	1.48166	1.3661	5.86015e-05	0.0337789	0.0966018	0.0148572	0.610379	0.709698
TRINITY_DN35356_c1_g1_i3	1.69158	-0.284603	-2.04043	3.23011	1.21808	4.11369	5.94002e-05	0.575488	6.43325e-07	0.015014	1	0.000291038
TRINITY_DN32878_c0_g1_i1	1.14923	0.161835	-1.04703	2.21796	1.11871	2.06627	6.1205e-05	0.549697	3.0746e-05	0.0154235	1	0.00671604
TRINITY_DN35673_c0_g2_i1	-1.57166	-0.883168	0.633092	2.97246	1.84442	1.55088	6.30057e-05	0.000291148	0.0789894	0.0158294	0.0521045	0.663271
TRINITY_DN27253_c0_g1_i2	7.65803	6.26163	-1.4063	201.974	76.7251	2.65056	6.47628e-05	0.0174946	0.142918	0.016222	0.470025	0.807327
TRINITY_DN22480_c0_g1_i1	-2.099	-0.56694	1.47532	4.28413	1.48138	2.78045	6.64078e-05	0.133188	0.00294556	0.0165843	0.959288	0.143216
TRINITY_DN33490_c0_g1_i1	7.84191	8.44716	0.568011	229.431	349.019	1.48248	6.66644e-05	1.32359e-07	0.422171	0.0165986	0.000164095	1
TRINITY_DN32793_c1_g1_i1	1.02316	-0.795424	-1.87909	2.03236	1.73559	3.67844	6.77772e-05	0.00239766	2.36983e-13	0.0168062	0.184282	5.15132e-10
TRINITY_DN32220_c0_g1_i5	-4.10802	-2.13102	1.89939	17.244	4.38026	3.73055	6.79011e-05	0.042644	0.183363	0.0168062	0.664919	0.862528
TRINITY_DN22495_c0_g2_i1	7.68926	5.13193	-2.69639	206.394	35.0642	6.48179	7.01368e-05	0.206384	0.0445413	0.0173082	1	0.531374
TRINITY_DN36099_c0_g1_i1	-1.1562	-0.671282	0.429021	2.22869	1.59249	1.34632	7.07799e-05	0.00968007	0.129808	0.017402	0.365918	0.784067
TRINITY_DN32143_c3_g3_i6	-1.5399	-0.836813	0.646532	2.90774	1.7861	1.5654	7.09342e-05	0.0105039	0.0875482	0.017402	0.383175	0.686308
TRINITY_DN23772_c0_g1_i1	-1.816	-0.839067	0.926169	3.52103	1.78889	1.90022	7.41297e-05	0.00178121	0.0328305	0.0181327	0.158226	0.471858
TRINITY_DN23789_c0_g1_i1	-2.10938	-0.623565	1.42949	4.31506	1.54068	2.69351	7.60517e-05	0.0842459	0.00409305	0.0185484	0.844393	0.169193
TRINITY_DN2601_c0_g4_i1	-1.10651	-0.850421	0.192402	2.15323	1.80303	1.14266	7.63467e-05	0.0136776	0.553724	0.0185661	0.426204	1
TRINITY_DN34210_c0_g1_i1	-1.91859	-1.29989	0.565801	3.78054	2.46209	1.48021	7.67362e-05	5.05086e-05	0.243356	0.0186065	0.0162433	0.924523
TRINITY_DN28880_c0_g1_i1	-1.23868	-0.253372	0.923747	2.35982	1.19199	1.89704	7.77316e-05	0.379614	0.00375463	0.0187933	1	0.161965
TRINITY_DN24496_c0_g1_i2	3.02619	-1.74337	-4.86056	8.14655	3.34816	29.0518	7.978e-05	0.162487	3.29341e-12	0.0192012	1	5.7552e-09
TRINITY_DN28279_c0_g1_i2	1.88477	0.667448	-1.26895	3.69294	1.58826	2.40986	7.98793e-05	0.132755	0.00258857	0.0192012	0.957939	0.133604
TRINITY_DN35362_c0_g1_i3	7.70996	6.68459	-1.07611	209.377	102.863	2.10834	8.10598e-05	0.0157962	0.331047	0.019429	0.449374	0.967246
TRINITY_DN27413_c0_g1_i1	-1.37174	-0.398486	0.915679	2.58783	1.31812	1.88646	8.21167e-05	0.133297	0.00622683	0.0196259	0.959632	0.215179
TRINITY_DN22946_c0_g2_i1	1.45527	1.19298	-0.314633	2.74208	2.28624	1.2437	8.28598e-05	0.000393131	0.307196	0.0197469	0.0643252	0.960714
TRINITY_DN30809_c0_g1_i1	-1.07092	-0.425661	0.583748	2.10077	1.34319	1.49874	8.47717e-05	0.135173	0.033301	0.0201074	0.964887	0.473947
TRINITY_DN32468_c0_g1_i2	-7.01674	-0.870212	6.12167	129.494	1.82793	69.6316	8.49424e-05	0.570763	0.0327528	0.0201074	1	0.471855
TRINITY_DN31561_c0_g1_i1	-2.21102	-0.577591	1.58433	4.63002	1.49236	2.99869	8.50958e-05	0.0563642	0.00348966	0.0201074	0.731449	0.1558
TRINITY_DN29448_c0_g2_i1	-2.07038	-0.647308	1.3725	4.19998	1.56624	2.58919	8.56715e-05	0.0669057	0.00642305	0.0201863	0.779083	0.218487
TRINITY_DN55935_c0_g2_i1	-7.03331	-0.887574	6.12167	130.99	1.85006	69.6316	8.64345e-05	0.570802	0.0327514	0.0203087	1	0.471855
TRINITY_DN16353_c0_g1_i1	-1.17538	-0.751078	0.359188	2.25852	1.68305	1.2827	8.69275e-05	0.0404366	0.314636	0.0203672	0.650698	0.961188
TRINITY_DN33968_c1_g1_i1	-2.024	-0.81093	1.15903	4.06711	1.75434	2.23307	8.8189e-05	0.018381	0.0194624	0.0206048	0.477638	0.374709
TRINITY_DN26570_c0_g1_i1	-1.77379	-0.537701	1.1777	3.41951	1.45166	2.26216	8.86462e-05	0.0983441	0.00711074	0.0206538	0.877957	0.231117
TRINITY_DN34480_c0_g1_i7	-2.34051	4.10492	6.37391	5.0648	17.2069	82.9349	8.89575e-05	8.87915e-05	3.1665e-10	0.0206686	0.0241129	3.24373e-07
TRINITY_DN28960_c0_g1_i1	-1.70699	-0.345131	1.31005	3.26478	1.27027	2.47951	8.92814e-05	0.164886	0.00129433	0.0206848	1	0.0881234
TRINITY_DN21443_c1_g1_i1	7.69271	0	-7.71141	206.889	0	209.588	8.9523e-05	0	1.65836e-06	0.0206848	0	0.000653966
TRINITY_DN25513_c0_g3_i1	-1.18522	-0.379408	0.752382	2.27398	1.30081	1.68457	9.08936e-05	0.123888	0.0104437	0.0209435	0.940978	0.280182
TRINITY_DN34685_c0_g1_i2	1.35384	0.798339	-0.607368	2.55591	1.7391	1.52348	9.22376e-05	0.0243296	0.0527365	0.0211946	0.535853	0.571484
TRINITY_DN32301_c1_g1_i1	-1.14872	-0.686931	0.405315	2.21717	1.60986	1.32438	9.37356e-05	0.00290129	0.13475	0.0214796	0.203953	0.795364
TRINITY_DN19637_c0_g2_i1	-1.53572	-0.153516	1.33551	2.89933	1.11228	2.52365	9.6585e-05	0.700249	0.00320945	0.0220719	1	0.149311
TRINITY_DN29582_c0_g1_i1	1.2687	-0.930801	-2.2617	2.40945	1.90633	4.79555	9.72051e-05	0.0110517	3.96165e-11	0.0221529	0.392773	5.04386e-08
TRINITY_DN55879_c0_g1_i1	-1.3984	-1.01905	0.324245	2.63609	2.02658	1.25201	9.93911e-05	0.00297044	0.372185	0.0225523	0.205585	1
TRINITY_DN35673_c0_g1_i1	-2.3533	-0.310882	1.98734	5.1099	1.24047	3.96506	9.9498e-05	0.325981	0.000633109	0.0225523	1	0.0568217
TRINITY_DN33968_c1_g1_i6	-1.90897	-0.997158	0.859673	3.75541	1.99606	1.81463	0.000100823	0.00218454	0.0682235	0.0227481	0.176968	0.630456
TRINITY_DN35940_c0_g1_i2	-1.05993	-0.986275	0.0170822	2.08483	1.98106	1.01191	0.000100908	0.000191411	0.943426	0.0227481	0.0389858	1
TRINITY_DN30818_c0_g1_i2	7.36104	8.11289	0.731389	164.397	276.836	1.66024	0.000103125	2.1691e-05	0.350252	0.0231723	0.00937138	0.982405
TRINITY_DN33434_c0_g3_i1	-2.25033	0.297389	2.49039	4.75792	1.22892	5.6193	0.000103506	0.542333	6.37308e-07	0.0231723	1	0.000290939
TRINITY_DN30696_c0_g5_i1	-8.7792	-8.76204	0	439.341	434.148	0	0.000103623	8.95154e-05	0	0.0231723	0.0242182	0
TRINITY_DN27336_c0_g1_i3	-7.00903	0.526395	7.50717	128.803	1.44033	181.921	0.000104419	0.739265	0.000472369	0.0232879	1	0.0481126
TRINITY_DN23718_c0_g1_i1	-1.01077	0.0976346	1.05176	2.01499	1.07002	2.07306	0.000105783	0.68814	1.65813e-05	0.0235292	1	0.00406891
TRINITY_DN1991_c0_g1_i1	-3.21397	-1.06492	2.09984	9.27898	2.09205	4.28663	0.0001065	0.0532649	0.0112839	0.0236257	0.718032	0.291918
TRINITY_DN33528_c0_g1_i4	7.31496	7.79822	0.457954	159.23	222.586	1.37359	0.000107511	1.88478e-05	0.539242	0.0237369	0.00835778	1
TRINITY_DN31523_c0_g1_i4	1.9667	0.587003	-1.41491	3.90873	1.50212	2.66642	0.000108013	0.268964	0.01215	0.0237369	1	0.301758
TRINITY_DN30922_c0_g1_i14	1.18569	0.172231	-1.07423	2.27472	1.1268	2.1056	0.000108096	0.648507	0.000921153	0.0237369	1	0.071498
TRINITY_DN25349_c0_g1_i1	-1.93656	0.0182171	1.89787	3.82791	1.01271	3.72662	0.000108139	0.987173	2.78362e-05	0.0237369	1	0.00621758
TRINITY_DN33386_c0_g1_i12	-7.1824	-7.16523	0	145.25	143.532	0	0.000108934	9.32325e-05	0	0.0238484	0.0248259	0
TRINITY_DN20300_c0_g2_i2	7.54766	5.13193	-2.556	187.099	35.0643	5.88075	0.000110164	0.20639	0.0593776	0.0240047	1	0.595584
TRINITY_DN20808_c1_g1_i1	-1.34441	-0.340549	0.949749	2.53926	1.26624	1.93154	0.000110223	0.191076	0.00327208	0.0240047	1	0.150662
TRINITY_DN34757_c0_g1_i20	-1.57427	-0.262845	1.25762	2.97784	1.19984	2.39102	0.000110586	0.41088	0.00122044	0.024021	1	0.0852592
TRINITY_DN34696_c1_g1_i1	-1.48386	-0.764098	0.663918	2.79696	1.69831	1.58438	0.000111545	0.00422097	0.0698201	0.0241639	0.244302	0.633721
TRINITY_DN16441_c0_g1_i1	1.34734	0.992136	-0.408787	2.54443	1.98913	1.32757	0.000111823	0.00594232	0.182759	0.0241639	0.288416	0.862528
TRINITY_DN18620_c0_g1_i2	-1.2727	-0.499936	0.715135	2.41613	1.41415	1.64164	0.000112473	0.0368031	0.0203543	0.0242415	0.630287	0.383269
TRINITY_DN33843_c4_g1_i1	1.21767	0.119637	-1.15319	2.32571	1.08646	2.22406	0.000113567	0.733813	0.000107734	0.0244142	1	0.0175378
TRINITY_DN30743_c0_g1_i3	-7.0874	-3.97938	3.0003	135.994	15.7729	8.00164	0.000117891	0.00190379	0.61014	0.0252787	0.163021	1
TRINITY_DN35957_c0_g1_i6	7.26975	7.94392	0.61915	154.317	246.24	1.53597	0.000119931	1.9284e-05	0.386955	0.0256304	0.00845966	1
TRINITY_DN12043_c0_g1_i1	-7.15543	0.405753	7.53476	142.56	1.32478	185.433	0.000120146	0.807401	0.000378327	0.0256304	1	0.0416262
TRINITY_DN11016_c0_g1_i1	-2.33039	-1.41786	0.858909	5.02941	2.67188	1.81367	0.000120964	0.00348439	0.188992	0.0257391	0.223691	0.873555
TRINITY_DN34411_c0_g1_i6	9.60399	9.37735	-0.269567	778.194	665.065	1.20545	0.000122155	2.2229e-11	0.794752	0.0259265	1.11856e-07	1
TRINITY_DN5316_c0_g1_i1	-1.33223	-0.446032	0.830007	2.51792	1.36229	1.77769	0.000124282	0.135029	0.0127265	0.026057	0.964512	0.307374
TRINITY_DN2601_c0_g3_i1	9.66011	0	-9.67565	809.062	0	817.828	0.000124398	0	2.39332e-06	0.026057	0	0.000903801
TRINITY_DN47650_c0_g1_i1	-6.98298	-1.63401	5.32653	126.498	3.10374	40.1279	0.000124509	0.115382	0.00690604	0.026057	0.927828	0.226994
TRINITY_DN26187_c0_g1_i1	-1.58482	-1.80559	-0.270637	2.99971	3.49572	1.20634	0.000124805	0.0173045	0.699045	0.026057	0.468786	1
TRINITY_DN20893_c0_g1_i1	-1.92816	-0.355682	1.51338	3.8057	1.27959	2.85479	0.000125161	0.307482	0.0015033	0.026057	1	0.0973231
TRINITY_DN34923_c0_g2_i8	-6.95838	-6.94152	0	124.36	122.915	0	0.000125169	8.98573e-05	0	0.026057	0.0242182	0
TRINITY_DN10456_c0_g1_i1	-2.34148	-0.452316	1.84145	5.06821	1.36824	3.5837	0.000125247	0.205073	0.00218911	0.026057	1	0.12022
TRINITY_DN31502_c0_g1_i5	-6.95838	-1.49408	5.41571	124.36	2.81685	42.6866	0.000125269	0.162781	0.0151907	0.026057	1	0.335639
TRINITY_DN31454_c0_g1_i12	-8.18289	-0.0788699	8.09201	290.6	1.05619	272.859	0.000126287	0.915365	5.78105e-05	0.0262033	1	0.0111039
TRINITY_DN26084_c2_g1_i1	-1.19632	-0.581183	0.558723	2.29155	1.49608	1.47296	0.000127542	0.0440505	0.0663722	0.0263981	0.670808	0.62392
TRINITY_DN33438_c0_g1_i3	-7.13744	-7.12022	0	140.794	139.123	0	0.000128298	0.000104836	0	0.0264887	0.0262816	0
TRINITY_DN31271_c0_g2_i1	2.08444	-0.0326111	-2.18485	4.24111	1.02286	4.5468	0.000129332	0.963502	1.52799e-05	0.0266363	1	0.00383599
TRINITY_DN33210_c0_g1_i8	-7.0827	-0.587531	6.46653	135.552	1.50267	88.4342	0.000133399	0.636406	0.00197761	0.0273849	1	0.113915
TRINITY_DN8415_c0_g1_i1	-1.39724	-1.0619	0.275668	2.63398	2.08768	1.21055	0.000133624	0.00105871	0.412534	0.0273849	0.116709	1
TRINITY_DN30160_c0_g1_i1	-1.70905	-0.373235	1.28565	3.26946	1.29525	2.43792	0.000134878	0.367744	0.0050442	0.0275742	1	0.190538
TRINITY_DN7671_c0_g1_i1	7.31509	6.13185	-1.23514	159.244	70.1249	2.35404	0.000138462	0.0697943	0.323382	0.0282379	0.791422	0.961256
TRINITY_DN35731_c7_g1_i6	-4.49859	-0.18343	4.24613	22.6053	1.13558	18.9764	0.000138824	0.771568	1.73636e-05	0.0282426	1	0.00422809
TRINITY_DN36001_c0_g2_i3	-1.8744	-0.778946	1.04355	3.6665	1.71588	2.06129	0.000141118	0.00710382	0.0272641	0.0286393	0.316175	0.436549
TRINITY_DN34823_c0_g4_i5	-1.57592	-1.21662	0.29374	2.98125	2.32401	1.22581	0.000142498	0.000209197	0.453045	0.028847	0.0410448	1
TRINITY_DN25136_c0_g1_i1	-2.10219	-0.369728	1.6827	4.29362	1.29211	3.21029	0.000143061	0.259521	0.00157064	0.028847	1	0.0999846
TRINITY_DN1424_c0_g1_i1	-1.12924	-0.464807	0.605909	2.18744	1.38013	1.52194	0.000143513	0.0707451	0.0274889	0.028847	0.796385	0.437803
TRINITY_DN3624_c0_g1_i1	1.92275	-0.126031	-2.09524	3.79145	1.09129	4.27298	0.000143524	0.823331	9.61422e-06	0.028847	1	0.00269499
TRINITY_DN22371_c0_g1_i3	2.47468	-0.927032	-3.46051	5.55846	1.90136	11.0082	0.000145417	0.362718	2.65167e-07	0.0291559	1	0.000133515
TRINITY_DN31998_c0_g1_i1	-1.18423	-0.754966	0.369703	2.27243	1.68759	1.29209	0.00014576	0.00556106	0.228036	0.0291559	0.279638	0.911331
TRINITY_DN31452_c0_g1_i1	-2.92128	-0.413026	2.4555	7.57518	1.33148	5.48501	0.000148354	0.341605	0.0010489	0.0296038	1	0.0770018
TRINITY_DN39746_c0_g1_i1	-1.38718	-0.831833	0.502614	2.61567	1.77995	1.41678	0.000149685	0.0212703	0.159637	0.029798	0.508254	0.822611
TRINITY_DN35835_c0_g1_i4	-7.14744	-7.13169	0	141.774	140.234	0	0.000151731	0.000118266	0	0.0301334	0.02866	0
TRINITY_DN30757_c0_g1_i3	3.68281	3.79598	0.0663484	12.8421	13.8901	1.04706	0.000154661	0.000105969	0.909118	0.0306424	0.0264285	1
TRINITY_DN15332_c0_g1_i1	-2.32936	-0.754122	1.52595	5.02583	1.6866	2.87976	0.000155893	0.0045006	0.00723213	0.0308132	0.250081	0.2335
TRINITY_DN34817_c0_g1_i1	-1.39033	-0.719658	0.616255	2.62139	1.64679	1.53289	0.00015636	0.0197536	0.088783	0.0308325	0.49598	0.690951
TRINITY_DN33251_c0_g1_i1	-1.25738	-0.728429	0.473393	2.39061	1.65683	1.38837	0.000158949	0.00265553	0.12768	0.0312691	0.19444	0.778485
TRINITY_DN18670_c0_g1_i2	7.36445	6.90951	-0.49112	164.786	120.218	1.40554	0.000159456	0.00726769	0.612092	0.0312949	0.32008	1
TRINITY_DN12015_c0_g1_i1	-1.00099	-0.695574	0.24923	2.00138	1.61953	1.18857	0.000165955	0.00363893	0.329206	0.0324646	0.227641	0.966753
TRINITY_DN35017_c0_g2_i3	7.61184	8.79579	1.14703	195.61	444.422	2.21458	0.000166222	4.79292e-09	0.095502	0.0324646	1.00001e-05	0.70713
TRINITY_DN56029_c0_g1_i1	-1.34908	-0.949439	0.342869	2.54749	1.93112	1.26828	0.000166583	0.000310602	0.323368	0.0324646	0.0543357	0.961256
TRINITY_DN34388_c0_g1_i12	-1.21093	-1.04917	0.0973558	2.31486	2.06934	1.06981	0.000168752	0.00454535	0.791233	0.0328107	0.250372	1
TRINITY_DN33988_c0_g1_i1	-7.46027	0.556186	7.96911	176.102	1.47038	250.577	0.000170788	0.834832	0.00370074	0.0331293	1	0.160633
TRINITY_DN34917_c0_g1_i1	7.89169	8.28971	0.352153	237.484	312.933	1.27646	0.000172618	1.75873e-06	0.676577	0.0334066	0.00139304	1
TRINITY_DN5903_c0_g1_i1	2.01649	0.394188	-1.67647	4.04597	1.3142	3.19646	0.000173755	0.327485	0.00013825	0.0335488	1	0.0209543
TRINITY_DN32143_c3_g3_i2	-1.65215	-0.849183	0.746532	3.14303	1.80148	1.67775	0.000175258	0.00871641	0.0785843	0.0337608	0.347616	0.662905
TRINITY_DN34817_c0_g2_i3	-1.53298	-0.668132	0.810936	2.89382	1.58901	1.75435	0.000177028	0.0286282	0.0387862	0.0339769	0.573576	0.505977
TRINITY_DN30673_c0_g1_i2	7.31479	7.94608	0.629508	159.21	246.609	1.54704	0.000177194	0.00651457	0.63082	0.0339769	0.300549	1
TRINITY_DN26979_c0_g1_i5	-4.36326	0.440767	4.71924	20.5813	1.35733	26.3411	0.000182712	0.516314	8.48949e-07	0.0349546	1	0.000374554
TRINITY_DN33856_c0_g1_i1	-1.20219	-0.546	0.601868	2.30088	1.46003	1.51768	0.000184355	0.020193	0.0463862	0.0351199	0.501631	0.540265
TRINITY_DN16233_c0_g1_i1	-0.979713	-0.506214	0.41813	1.97207	1.42032	1.33619	0.000184822	0.0289851	0.0919763	0.0351199	0.57529	0.698795
TRINITY_DN28574_c0_g1_i4	-1.32481	-0.677041	0.593078	2.50499	1.59886	1.50846	0.000184839	0.0261033	0.0845404	0.0351199	0.550788	0.676824
TRINITY_DN27310_c0_g3_i2	2.01392	-0.880902	-2.94744	4.03879	1.84153	7.71381	0.000188249	0.117262	2.60565e-10	0.0356865	0.93444	2.79785e-07
TRINITY_DN26300_c0_g1_i1	-1.96917	-0.233563	1.67981	3.91542	1.17574	3.20385	0.000188913	0.495082	0.000414346	0.0357311	1	0.0440135
TRINITY_DN2934_c0_g1_i1	-1.75088	-0.294975	1.39931	3.36563	1.22686	2.63776	0.000189655	0.427085	0.000744886	0.0357902	1	0.0628653
TRINITY_DN35707_c0_g1_i9	-8.38402	-0.119948	8.259	334.074	1.0867	306.343	0.000190167	0.888724	1.62439e-05	0.0358058	1	0.00403257
TRINITY_DN17652_c0_g1_i1	-6.82336	-0.618758	6.1517	113.249	1.53555	71.0964	0.00019116	0.517261	0.000857497	0.0359118	1	0.0682899
TRINITY_DN35825_c0_g1_i8	-2.90594	-2.08079	0.758448	7.49505	4.23038	1.69167	0.000198496	0.149153	0.639015	0.0372061	0.996445	1
TRINITY_DN35927_c2_g10_i3	-1.01786	-1.25121	-0.296924	2.02491	2.38042	1.22852	0.000206111	2.13938e-05	0.26757	0.0385469	0.00928991	0.950433
TRINITY_DN30659_c0_g1_i1	-2.05477	-0.905373	1.0964	4.15477	1.87303	2.13821	0.000209948	0.00606936	0.0430701	0.0390993	0.291193	0.525678
TRINITY_DN24428_c0_g3_i1	-8.46859	-8.45141	0	354.242	350.048	0	0.000210002	0.000179656	0	0.0390993	0.0373929	0
TRINITY_DN31452_c0_g1_i2	-2.38441	-0.266264	2.06828	5.22129	1.20269	4.19387	0.000211706	0.356942	0.00062466	0.0393288	1	0.0562278
TRINITY_DN29967_c0_g1_i1	1.00842	0.553546	-0.511847	2.0117	1.46769	1.42587	0.000221586	0.0519769	0.0512426	0.0410728	0.710159	0.56455
TRINITY_DN6154_c0_g2_i1	1.3053	0.628211	-0.730795	2.47135	1.54565	1.65955	0.000223579	0.0298433	0.0220372	0.0413503	0.582838	0.397376
TRINITY_DN32430_c0_g3_i1	-1.82619	-0.0529414	1.72482	3.546	1.03738	3.30538	0.0002261	0.881688	0.0010765	0.0416461	1	0.0784083
TRINITY_DN34021_c0_g1_i2	1.47522	0.186423	-1.34827	2.78026	1.13794	2.54607	0.000226177	0.656022	8.05198e-05	0.0416461	1	0.0140042
TRINITY_DN33613_c0_g1_i1	-1.47408	-0.773744	0.647687	2.77807	1.7097	1.56665	0.000227906	0.00244576	0.0834385	0.0418719	0.185863	0.674771
TRINITY_DN46045_c0_g1_i1	-1.01737	-0.558827	0.401688	2.02423	1.47307	1.32105	0.00022924	0.017444	0.126064	0.0419395	0.469874	0.774693
TRINITY_DN24259_c0_g1_i4	-8.3029	-2.2533	6.04901	315.807	4.76773	66.2113	0.000229288	0.192443	0.0224006	0.0419395	1	0.399891
TRINITY_DN23575_c0_g1_i1	-1.62326	-0.950918	0.619445	3.08071	1.9331	1.53628	0.000229782	0.000174465	0.13596	0.0419395	0.03671	0.798202
TRINITY_DN35946_c0_g1_i8	-7.33372	-2.81693	4.48704	161.313	7.04659	22.4251	0.00023187	0.0488679	0.126725	0.0421912	0.695769	0.775541
TRINITY_DN34605_c0_g1_i3	1.83004	-0.0209803	-1.91251	3.55546	1.01465	3.76463	0.000232173	0.989422	3.91401e-05	0.0421912	1	0.00818836
TRINITY_DN53719_c0_g1_i1	-6.91334	-2.08715	4.81114	120.538	4.24907	28.0735	0.000235993	0.087476	0.0488062	0.0427922	0.847842	0.552695
TRINITY_DN17085_c0_g1_i2	-1.73692	-0.721784	0.962325	3.33322	1.64922	1.94845	0.000237695	0.102185	0.0519661	0.0429936	0.893205	0.567451
TRINITY_DN15192_c0_g1_i2	-4.08189	-0.332779	3.68003	16.9344	1.25944	12.8174	0.000238135	0.730971	0.000206179	0.0429936	1	0.0273033
TRINITY_DN52207_c0_g1_i1	-3.41637	-1.43846	1.92235	10.6765	2.71031	3.79039	0.000239434	0.0209075	0.0408183	0.0430866	0.505452	0.515124
TRINITY_DN35153_c0_g1_i2	9.11847	9.09328	-0.0513659	555.818	546.197	1.03625	0.000239683	0.00011199	0.974229	0.0430866	0.0276082	1
TRINITY_DN29766_c0_g2_i2	-6.75597	0.0616618	6.75919	108.081	1.04367	108.323	0.000242056	1	0.00199258	0.0434197	1	0.114201
TRINITY_DN46212_c0_g1_i1	-1.19181	-0.778853	0.356775	2.28439	1.71577	1.28056	0.000248213	0.0118755	0.25952	0.0444285	0.400717	0.946988
TRINITY_DN34388_c0_g1_i1	-1.53264	-0.573437	0.907281	2.89314	1.48806	1.87551	0.000255344	0.0520444	0.0264362	0.0456071	0.710503	0.429936
TRINITY_DN30952_c0_g1_i1	-1.59804	-0.55055	0.994778	3.02732	1.46464	1.99277	0.000256455	0.0642345	0.0201757	0.0456532	0.765836	0.381681
TRINITY_DN20411_c0_g2_i1	1.05552	0.0383465	-1.07377	2.07847	1.02694	2.10493	0.000256697	0.887508	2.82352e-05	0.0456532	1	0.00629094
TRINITY_DN2390_c0_g1_i1	1.1776	0.598439	-0.636721	2.262	1.51408	1.55479	0.000260467	0.0734817	0.0294814	0.0462251	0.80607	0.45114
TRINITY_DN34956_c0_g1_i2	-1.53041	-0.4012	1.07471	2.88868	1.32061	2.1063	0.000268691	0.127307	0.00640958	0.0475835	0.945115	0.218195
TRINITY_DN32014_c0_g1_i7	-6.86869	-2.07185	4.80715	116.864	4.20425	27.996	0.000271908	0.123808	0.0526516	0.048051	0.940978	0.571042
TRINITY_DN35016_c0_g2_i26	-3.74078	-0.169426	3.51087	13.3686	1.12461	11.3992	0.000274459	0.76242	0.000759856	0.0483993	1	0.0636465
TRINITY_DN36042_c0_g1_i2	1.41286	-0.58973	-2.04501	2.66264	1.50496	4.12676	0.00028025	0.27804	4.57848e-05	0.0493163	1	0.00925269
TRINITY_DN33532_c0_g1_i1	2.44777	1.42933	-1.06642	5.45573	2.69322	2.09423	0.000285996	0.079179	0.0435922	0.0501986	0.827089	0.527693
TRINITY_DN27693_c0_g1_i1	-1.03676	-1.04347	-0.0633247	2.05161	2.06118	1.04487	0.000286695	0.000158186	0.786416	0.0501986	0.0342578	1
TRINITY_DN9768_c0_g2_i1	-1.43888	-0.692449	0.690733	2.71111	1.61602	1.6141	0.000287327	0.0124764	0.0689422	0.0501986	0.409862	0.632907
TRINITY_DN35870_c0_g1_i7	-6.90408	-2.90822	3.94871	119.766	7.50693	15.4412	0.000288212	0.0341606	0.236107	0.0501986	0.612668	0.913548
TRINITY_DN35780_c0_g1_i7	7.14122	7.01818	-0.167201	141.164	129.623	1.12288	0.000288798	0.000314677	0.834649	0.0501986	0.0548206	1
TRINITY_DN29482_c0_g1_i3	7.2102	7.02601	-0.204303	148.076	130.329	1.15213	0.000288875	0.00504927	0.837676	0.0501986	0.263786	1
TRINITY_DN27656_c0_g1_i3	7.04365	7.43191	0.331318	131.932	172.674	1.25816	0.000293713	0.000285087	0.654613	0.0509332	0.0516684	1
TRINITY_DN29391_c0_g1_i1	-1.00872	-0.733358	0.2178	2.01213	1.6625	1.16296	0.000294561	0.00602816	0.345428	0.0509744	0.290298	0.977029
TRINITY_DN31773_c0_g1_i3	-6.76602	-0.922549	5.83335	108.837	1.89546	57.018	0.000296799	0.509942	0.0303777	0.0512552	1	0.457494
TRINITY_DN25020_c0_g1_i2	-7.01974	-3.56646	3.34945	129.763	11.8471	10.1926	0.000304491	0.00892008	0.421378	0.0524751	0.351854	1
TRINITY_DN29658_c0_g1_i2	2.14944	-0.589054	-2.79126	4.43657	1.50426	6.92236	0.000311078	0.460033	1.90096e-07	0.0534997	1	0.000100843
TRINITY_DN35765_c0_g1_i6	-2.37527	-1.25222	1.05622	5.18832	2.38208	2.07948	0.000316496	0.0743556	0.163983	0.0543195	0.808629	0.832215
TRINITY_DN28693_c0_g1_i1	-0.907473	-0.556332	0.294279	1.87576	1.47053	1.22627	0.000320677	0.0150653	0.219818	0.054924	0.442935	0.903269
TRINITY_DN33130_c0_g1_i2	-8.14427	-1.57144	6.50954	282.925	2.972	91.1098	0.00032177	0.354731	0.0125365	0.0549982	1	0.305112
TRINITY_DN320_c0_g2_i1	-1.20124	-0.841191	0.304546	2.29937	1.79153	1.23503	0.000326223	0.000249682	0.318678	0.0555524	0.0465333	0.961188
TRINITY_DN35516_c0_g2_i2	-0.958473	-0.569552	0.333428	1.94325	1.48406	1.26	0.000326344	0.0263563	0.214428	0.0555524	0.552739	0.901805
TRINITY_DN60154_c0_g1_i1	-2.94809	-1.1785	1.71152	7.71725	2.26342	3.27505	0.000327048	0.0208483	0.0383535	0.0555589	0.505322	0.50289
TRINITY_DN8927_c0_g1_i1	-1.19211	-0.274081	0.862809	2.28487	1.20922	1.81858	0.000329289	0.266956	0.00647648	0.055779	1	0.219383
TRINITY_DN28274_c0_g3_i3	-6.6956	0.209443	6.87895	103.652	1.15624	117.698	0.000329681	0.89091	3.17314e-05	0.055779	1	0.00689747
TRINITY_DN34388_c0_g1_i10	-1.62075	-1.01547	0.547768	3.07535	2.02156	1.46182	0.000331574	0.00984251	0.251261	0.0559856	0.369012	0.939313
TRINITY_DN36023_c0_g1_i12	7.07449	6.65505	-0.476165	134.782	100.779	1.39104	0.00033718	0.0437867	0.732606	0.0568172	0.669845	1
TRINITY_DN35463_c0_g1_i1	7.37472	6.94323	-0.487401	165.963	123.061	1.40192	0.00034152	0.00711547	0.648855	0.0574324	0.316273	1
TRINITY_DN33215_c0_g1_i1	-6.73599	-0.989451	5.66838	106.595	1.98543	50.8573	0.000342689	0.471206	0.0359454	0.0575131	1	0.48907
TRINITY_DN35533_c1_g1_i5	-6.9385	-2.9735	3.86517	122.658	7.85437	14.5725	0.000347149	0.0334339	0.233081	0.0581446	0.607001	0.911331
TRINITY_DN32744_c0_g1_i1	-1.20153	-0.36916	0.775985	2.29983	1.2916	1.71236	0.000348489	0.167693	0.0125555	0.0582521	1	0.305226
TRINITY_DN16799_c0_g1_i1	-2.01425	-0.48932	1.472	4.03971	1.40378	2.77406	0.000355166	0.0880207	0.005811	0.0592494	0.848591	0.20633
TRINITY_DN27126_c0_g1_i3	-6.81286	-0.85661	5.91802	112.428	1.81078	60.4646	0.000365439	0.376847	0.000920881	0.0608074	1	0.071498
TRINITY_DN30436_c0_g1_i1	1.7025	1.33974	-0.421524	3.25463	2.53105	1.33934	0.000365963	0.00592911	0.265409	0.0608074	0.288182	0.949016
TRINITY_DN21884_c0_g1_i2	-1.06109	-0.773362	0.232355	2.08651	1.70925	1.17475	0.000368952	0.00253814	0.421739	0.0611823	0.189792	1
TRINITY_DN32289_c1_g1_i1	-1.19112	-0.204458	0.933351	2.2833	1.15225	1.90971	0.000374899	0.426457	0.00340248	0.0618546	1	0.153875
TRINITY_DN21229_c0_g1_i3	-8.06775	-2.4608	5.54278	268.309	5.50522	46.6169	0.000375175	0.155954	0.039236	0.0618546	1	0.508106
TRINITY_DN34426_c3_g2_i1	-8.06775	0.92136	8.96918	268.308	1.8939	501.178	0.000375231	0.603748	3.84519e-06	0.0618546	1	0.00129523
TRINITY_DN245_c0_g1_i1	1.00381	0.0490178	-1.01242	2.00529	1.03456	2.01729	0.000378773	0.857208	6.51988e-05	0.0623153	1	0.0121055
TRINITY_DN1883_c0_g1_i1	7.0468	5.05936	-2.00791	132.22	33.3441	4.02198	0.000379727	0.119469	0.0493997	0.0623492	0.938228	0.555253
TRINITY_DN28859_c0_g2_i1	-3.2417	-2.13747	1.0209	9.45909	4.3999	2.02918	0.000381949	0.0243373	0.417241	0.0625909	0.535884	1
TRINITY_DN33807_c0_g1_i7	-6.64335	-1.85357	4.75792	99.965	3.61394	27.0569	0.000389084	0.167575	0.107092	0.0636351	1	0.734423
TRINITY_DN27943_c0_g1_i2	-1.64665	-0.468008	1.1299	3.13107	1.3832	2.18843	0.000391715	0.135746	0.0116936	0.0639399	0.966559	0.296849
TRINITY_DN32165_c0_g1_i3	-8.04797	1.15788	9.15164	264.655	2.23129	568.747	0.000393391	0.670681	0.00094568	0.0640882	1	0.072622
TRINITY_DN7838_c0_g2_i1	-1.88401	-1.11918	0.709729	3.69099	2.17223	1.6355	0.00039754	0.0098439	0.181299	0.0646378	0.369012	0.862161
TRINITY_DN35215_c0_g1_i9	-6.76499	-1.31319	5.43324	108.759	2.4849	43.2084	0.00040759	0.352848	0.0491173	0.0660906	1	0.554154
TRINITY_DN36003_c0_g2_i10	6.94232	6.38094	-0.576645	122.983	83.3402	1.49138	0.000408059	0.0147751	0.535073	0.0660906	0.439518	1
TRINITY_DN30912_c0_g1_i6	7.25823	6.85483	-0.44142	153.089	115.747	1.35794	0.000409198	0.00825208	0.663298	0.066136	0.340037	1
TRINITY_DN32143_c3_g3_i4	-1.13834	-0.566209	0.516273	2.20127	1.48063	1.43026	0.000410361	0.0535708	0.0788509	0.066136	0.719067	0.663271
TRINITY_DN35439_c0_g1_i2	7.02424	5.69816	-1.31346	130.169	51.9181	2.48537	0.000411071	0.104358	0.308734	0.066136	0.899743	0.960714
TRINITY_DN34245_c1_g1_i4	1.24085	-0.594387	-1.89099	2.36338	1.50983	3.70891	0.000411711	0.0898073	1.46852e-08	0.066136	0.852743	1.07892e-05
TRINITY_DN21535_c0_g2_i2	7.2608	7.07398	-0.202043	153.362	134.735	1.15033	0.000412305	0.00895081	0.862767	0.066136	0.352527	1
TRINITY_DN33589_c0_g1_i3	-6.85287	-0.16733	6.65113	115.59	1.12298	100.506	0.000415099	0.877354	0.00130361	0.0663746	1	0.0884171
TRINITY_DN24265_c0_g1_i1	-1.61536	-0.745025	0.811056	3.06387	1.676	1.75449	0.000415383	0.0246524	0.0664717	0.0663746	0.539362	0.624345
TRINITY_DN35542_c0_g1_i1	1.25334	0.158799	-1.15482	2.38393	1.11636	2.22656	0.000418323	0.658722	9.39323e-05	0.0667166	1	0.0157358
TRINITY_DN26084_c2_g2_i1	-1.51018	-0.753222	0.702976	2.84846	1.68555	1.62786	0.000419636	0.0103002	0.0866383	0.0667967	0.379302	0.684327
TRINITY_DN28436_c0_g1_i2	-1.20178	-0.36814	0.78011	2.30024	1.29069	1.71726	0.00042049	0.133356	0.0157869	0.0667967	0.959643	0.340742
TRINITY_DN34680_c0_g3_i6	-1.95437	-0.889583	1.00063	3.87546	1.85264	2.00087	0.000421743	0.118182	0.108553	0.0667967	0.936093	0.7361
TRINITY_DN34242_c0_g1_i5	7.36245	5.30317	-2.14068	164.558	39.4834	4.4097	0.000422029	0.0809896	0.0587988	0.0667967	0.833263	0.59407
TRINITY_DN47073_c0_g1_i1	-3.04142	-0.801824	2.18349	8.23302	1.7433	4.54252	0.000431995	0.190826	0.00895395	0.0682445	1	0.259595
TRINITY_DN32065_c0_g1_i1	-1.16221	-0.337394	0.768241	2.23801	1.26347	1.70319	0.00043333	0.146365	0.0120177	0.0683261	0.993769	0.30018
TRINITY_DN31109_c0_g1_i1	-2.66433	-1.44446	1.16624	6.33933	2.72161	2.24426	0.000437395	0.0110387	0.116276	0.0687312	0.392547	0.753926
TRINITY_DN29617_c0_g1_i4	6.94385	7.51195	0.535846	123.114	182.525	1.44979	0.000437548	7.83278e-05	0.460315	0.0687312	0.022187	1
TRINITY_DN60996_c0_g1_i1	-1.3518	-0.785948	0.508153	2.5523	1.72423	1.42223	0.000439632	0.0284692	0.180132	0.0688393	0.573576	0.860789
TRINITY_DN8092_c0_g1_i1	-1.38936	-1.04907	0.275014	2.61963	2.0692	1.21001	0.000440028	0.0221686	0.550076	0.0688393	0.517353	1
TRINITY_DN34074_c0_g2_i9	8.89629	0	-8.91181	476.484	0	481.64	0.000440712	0	1.36516e-05	0.0688393	0	0.00355034
TRINITY_DN2601_c0_g2_i1	-0.965536	-1.0189	-0.116575	1.95279	2.02638	1.08416	0.000452018	0.00156598	0.70935	0.0704735	0.147209	1
TRINITY_DN31045_c0_g1_i4	-6.63242	-0.0245209	6.57245	99.2102	1.01714	95.1709	0.000453233	1	0.000276782	0.070531	1	0.0337458
TRINITY_DN33210_c0_g1_i12	4.16496	2.87793	-1.33059	17.9381	7.35094	2.51506	0.000454236	0.0312295	0.0536611	0.0705555	0.594724	0.575396
TRINITY_DN27486_c1_g1_i1	-1.47168	-0.45326	0.968725	2.77344	1.36913	1.95711	0.000456319	0.127842	0.0202201	0.0706322	0.946764	0.382197
TRINITY_DN30940_c0_g1_i7	8.91638	10.1555	1.20573	483.167	1140.51	2.30653	0.000456424	6.48071e-18	0.211131	0.0706322	9.23976e-14	0.895898
TRINITY_DN28233_c0_g1_i1	-2.72891	0.0927867	2.76121	6.62954	1.06643	6.77963	0.000457917	0.924666	5.87646e-05	0.0707321	1	0.0112136
TRINITY_DN54435_c0_g1_i1	-7.04484	-1.44948	5.57425	132.041	2.73109	47.6448	0.000458844	0.388479	0.0589075	0.0707443	1	0.59407
TRINITY_DN33465_c0_g1_i4	-1.07201	-0.573189	0.442737	2.10236	1.48781	1.35918	0.000461346	0.023933	0.12707	0.0709569	0.533295	0.776399
TRINITY_DN17844_c0_g1_i1	-1.00616	-0.290509	0.660941	2.00856	1.22307	1.58111	0.000461924	0.209771	0.0133626	0.0709569	1	0.313972
TRINITY_DN34150_c0_g1_i1	1.11245	0.0603837	-1.11225	2.16213	1.04274	2.16182	0.000467178	0.852001	0.000111801	0.0713892	1	0.0179563
TRINITY_DN25495_c0_g1_i1	-8.09606	-0.742321	7.29164	273.626	1.67287	156.676	0.000467278	0.64635	0.0045495	0.0713892	1	0.180878
TRINITY_DN31432_c0_g1_i1	-8.09606	-8.07886	0	273.626	270.383	0	0.000467307	0.000404175	0	0.0713892	0.0656068	0
TRINITY_DN35196_c0_g1_i1	6.98778	5.98466	-1.0431	126.921	63.3229	2.06065	0.000471255	0.0344872	0.328197	0.0718609	0.614513	0.965626
TRINITY_DN60596_c0_g1_i1	-0.992107	-0.408021	0.529451	1.98909	1.32686	1.44338	0.000473975	0.0824446	0.051412	0.0721436	0.838809	0.565538
TRINITY_DN35006_c0_g1_i2	3.92081	3.52848	-0.418685	15.1454	11.5393	1.33671	0.000476612	0.04067	0.681	0.0724129	0.651027	1
TRINITY_DN28421_c1_g1_i1	-0.899207	-0.625901	0.216306	1.86504	1.54317	1.16176	0.000478222	0.0061667	0.371659	0.0725255	0.293274	1
TRINITY_DN35935_c0_g1_i3	1.07549	-0.683879	-1.81744	2.10744	1.60645	3.52456	0.000479831	0.0035517	1.24822e-10	0.0726374	0.224674	1.44472e-07
TRINITY_DN34925_c0_g1_i3	-0.868701	-0.640916	0.169476	1.82602	1.55932	1.12465	0.000483363	0.00804216	0.478814	0.0729233	0.334633	1
TRINITY_DN23606_c0_g1_i3	-3.63202	-0.628979	2.93044	12.3979	1.54647	7.62343	0.000483468	0.494786	0.00879779	0.0729233	1	0.257581
TRINITY_DN35912_c0_g1_i5	7.47864	0	-7.50078	178.36	0	181.117	0.000487632	0	1.60713e-05	0.0734185	0	0.00401206
TRINITY_DN35884_c0_g2_i6	6.98449	5.21748	-1.79927	126.631	37.2064	3.48044	0.000494773	0.15132	0.132714	0.0743594	1	0.790773
TRINITY_DN23161_c0_g2_i4	-1.19967	-1.11639	0.0237959	2.29687	2.16804	1.01663	0.00049809	0.0012648	0.950478	0.0746817	0.128905	1
TRINITY_DN20661_c0_g1_i1	-1.69652	-0.211938	1.43293	3.24118	1.15824	2.69995	0.000498708	0.505185	0.00269288	0.0746817	1	0.136538
TRINITY_DN33684_c0_g2_i1	-1.48728	-0.455464	0.977169	2.80359	1.37122	1.9686	0.000500244	0.0901609	0.015632	0.0747775	0.854209	0.339712
TRINITY_DN35727_c0_g1_i3	-1.41375	0.0762563	1.43466	2.6643	1.05428	2.70318	0.000506582	0.856152	0.000400518	0.0755895	1	0.043162
TRINITY_DN23595_c0_g1_i1	-2.13275	-1.87161	0.201186	4.38553	3.6594	1.14964	0.00050873	0.00281086	0.792636	0.0757744	0.200377	1
TRINITY_DN26197_c0_g1_i1	-1.19661	-0.745153	0.398734	2.292	1.67615	1.31835	0.000513506	0.0064784	0.245883	0.0763494	0.30021	0.928968
TRINITY_DN5434_c0_g1_i1	-3.73059	-0.356862	3.32241	13.2746	1.28064	10.0033	0.000517815	0.619785	0.00074414	0.0767683	1	0.0628653
TRINITY_DN26751_c0_g1_i1	-1.47322	-0.295355	1.12577	2.77642	1.22719	2.18218	0.000518164	0.232462	0.00437919	0.0767683	1	0.176758
TRINITY_DN35967_c0_g1_i1	-6.56642	-3.10438	3.34947	94.774	8.60028	10.1928	0.000519393	0.0171389	0.42132	0.076814	0.467963	1
TRINITY_DN25423_c0_g1_i14	1.54435	0.305039	-1.29699	2.91672	1.23545	2.45715	0.000520763	0.769858	0.0891556	0.0768803	1	0.692013
TRINITY_DN22025_c0_g2_i1	-1.06917	-0.675107	0.335345	2.09823	1.59672	1.26168	0.000531515	0.00512045	0.252648	0.078329	0.265487	0.941311
TRINITY_DN46001_c0_g1_i1	-1.11121	-0.674736	0.383132	2.16027	1.5963	1.30417	0.000541166	0.0398685	0.241838	0.0795433	0.648307	0.922292
TRINITY_DN22848_c0_g1_i1	-0.843254	-0.405802	0.379249	1.79409	1.32483	1.30066	0.000541662	0.0832673	0.0995161	0.0795433	0.843024	0.720595
TRINITY_DN15565_c1_g2_i1	1.22589	-0.30641	-1.59219	2.339	1.23663	3.01506	0.000546263	0.42406	5.95266e-07	0.080078	1	0.00027346
TRINITY_DN4003_c0_g1_i1	-1.59855	-0.601426	0.945483	3.02838	1.51722	1.92583	0.000552844	0.0250023	0.0320729	0.0809005	0.540962	0.466982
TRINITY_DN22526_c0_g1_i2	-6.62181	-0.190604	6.39508	98.4832	1.14124	84.1609	0.000555284	0.895294	0.00743269	0.0811153	1	0.237
TRINITY_DN29263_c0_g1_i1	-1.16361	-0.441506	0.666085	2.24018	1.35802	1.58676	0.00055706	0.0669653	0.0304822	0.0812324	0.779083	0.457886
TRINITY_DN26481_c1_g1_i1	-1.95315	-0.339403	1.56456	3.87219	1.26523	2.95787	0.000563349	0.253347	0.00389743	0.0820061	1	0.165403
TRINITY_DN27303_c0_g1_i1	-2.15198	-0.175882	1.92362	4.44437	1.12966	3.79374	0.000574446	0.577821	0.00101583	0.0834758	1	0.0754439
TRINITY_DN33230_c0_g1_i6	-7.09459	-7.07724	0	136.673	135.04	0	0.000583035	0.000527602	0	0.0845766	0.0762385	0
TRINITY_DN54338_c0_g1_i1	-1.19457	-0.507452	0.630653	2.28876	1.42154	1.54827	0.000591351	0.0318008	0.0504556	0.0854314	0.59959	0.561177
TRINITY_DN33160_c0_g2_i1	6.89685	5.46336	-1.46809	119.168	44.1201	2.76655	0.000592582	0.0260363	0.0813846	0.0854314	0.550484	0.669144
TRINITY_DN30289_c0_g1_i1	-1.9265	-0.0829383	1.79175	3.80131	1.05917	3.46235	0.000594192	0.799305	0.000954769	0.0854314	1	0.073165
TRINITY_DN31484_c0_g1_i2	-5.17732	-1.49434	3.63487	36.1851	2.81736	12.4224	0.000594302	0.159193	0.020888	0.0854314	1	0.388294
TRINITY_DN26535_c0_g1_i1	-6.52055	-1.49777	4.98337	91.8084	2.82406	31.6332	0.000594932	0.205833	0.0372321	0.0854314	1	0.496588
TRINITY_DN25304_c0_g1_i2	-6.52055	-1.63363	4.91225	91.8084	3.10292	30.1117	0.000595073	0.298058	0.107927	0.0854314	1	0.735811
TRINITY_DN20104_c0_g1_i1	-1.30578	-0.561529	0.690054	2.47218	1.47583	1.61334	0.000597389	0.0118365	0.0479616	0.0856165	0.400688	0.548205
TRINITY_DN34817_c0_g2_i4	-1.39592	-0.709742	0.631747	2.63157	1.63551	1.54944	0.000600035	0.00747135	0.0944124	0.0858482	0.323119	0.705477
TRINITY_DN30012_c0_g1_i1	-1.11185	-0.413506	0.642277	2.16123	1.33192	1.56079	0.00060158	0.146138	0.0418862	0.0859219	0.992947	0.520944
TRINITY_DN30406_c0_g1_i1	-7.85654	-0.501799	7.34458	231.769	1.41598	162.532	0.000610238	0.701583	0.00036083	0.0870096	1	0.0405012
TRINITY_DN32146_c0_g1_i4	-7.83362	-7.81774	0	228.115	225.618	0	0.000615062	0.000573747	0	0.0872835	0.0814322	0
TRINITY_DN35335_c1_g2_i3	-0.938064	-1.14375	-0.267561	1.91595	2.20954	1.20377	0.000615802	5.92281e-05	0.288072	0.0872835	0.0181599	0.960714
TRINITY_DN17521_c0_g1_i1	2.0985	-0.949927	-3.10108	4.28263	1.93178	8.5806	0.000616067	0.121783	1.98971e-08	0.0872835	0.940978	1.35601e-05
TRINITY_DN23773_c0_g1_i1	-1.0323	-0.679834	0.29368	2.04529	1.60196	1.22576	0.000616346	0.0172004	0.324918	0.0872835	0.468241	0.963448
TRINITY_DN32009_c0_g1_i3	6.84855	4.14727	-2.66923	115.244	17.7195	6.36091	0.000617827	0.340629	0.0214458	0.087345	1	0.392624
TRINITY_DN34269_c0_g1_i2	-1.32161	-0.445518	0.824076	2.49944	1.3618	1.7704	0.000619105	0.138184	0.0275842	0.0873776	0.973746	0.438288
TRINITY_DN36059_c2_g1_i1	-7.9729	0.75118	8.66437	251.236	1.68317	405.728	0.000621508	0.631833	1.87955e-07	0.0875686	1	0.000100843
TRINITY_DN31852_c0_g1_i11	-6.49735	-0.936528	5.53465	90.3434	1.91392	46.3548	0.000624389	0.390026	0.00329002	0.0876284	1	0.151112
TRINITY_DN33275_c1_g1_i4	-1.74338	-0.847701	0.844738	3.34819	1.79963	1.79594	0.000624872	0.0409154	0.113332	0.0876284	0.652495	0.745527
TRINITY_DN26326_c0_g1_i2	-1.15202	-0.470158	0.626475	2.22225	1.38526	1.54379	0.000625869	0.147063	0.0590196	0.0876284	0.993844	0.59468
TRINITY_DN36078_c0_g1_i1	-0.81694	-0.566765	0.191666	1.76167	1.4812	1.14208	0.000627329	0.012808	0.407869	0.0876284	0.415762	1
TRINITY_DN35657_c0_g1_i14	2.04676	0.896011	-1.21333	4.13177	1.86091	2.31872	0.000627397	0.214938	0.0146026	0.0876284	1	0.329056
TRINITY_DN25156_c0_g1_i1	-0.998812	-0.638121	0.303344	1.99835	1.5563	1.234	0.000628698	0.0179834	0.287193	0.0876284	0.473118	0.960714
TRINITY_DN36032_c0_g1_i22	7.22582	5.44577	-1.87264	149.689	43.5852	3.66201	0.000629286	0.0772123	0.124999	0.0876284	0.820707	0.771907
TRINITY_DN26746_c0_g1_i2	6.94216	6.44894	-0.51962	122.97	87.3625	1.43358	0.000631911	0.0133688	0.614748	0.0878472	0.422938	1
TRINITY_DN28527_c0_g1_i8	8.62539	10.1789	1.52172	394.914	1159.19	2.87133	0.000633881	5.33478e-16	0.107549	0.0879745	5.07065e-12	0.735811
TRINITY_DN41029_c0_g1_i1	-1.39492	-0.194	1.14742	2.62975	1.14393	2.21518	0.000635059	0.476788	0.00309132	0.0879916	1	0.146338
TRINITY_DN2591_c0_g1_i1	-1.00082	-0.344823	0.600297	2.00113	1.27	1.51603	0.000641056	0.121111	0.0259489	0.0886752	0.93869	0.425661
TRINITY_DN35707_c0_g3_i1	-2.21429	-0.102606	2.05612	4.64053	1.07371	4.15865	0.000646196	0.801935	0.000614191	0.0892381	1	0.0557413
TRINITY_DN23954_c0_g1_i4	-6.50895	-1.13111	5.32033	91.0731	2.19027	39.9558	0.000651584	0.296011	0.0169242	0.0897361	1	0.351653
TRINITY_DN24619_c0_g1_i3	0.910207	-0.0341645	-1.0064	1.87931	1.02396	2.00889	0.000652838	0.89829	0.000173314	0.0897361	1	0.0242863
TRINITY_DN39329_c0_g1_i1	-2.57844	-0.814085	1.7114	5.97293	1.75818	3.27479	0.000653029	0.0314852	0.0183033	0.0897361	0.597209	0.364764
TRINITY_DN26256_c0_g1_i1	-2.02365	-0.433102	1.54302	4.06612	1.35013	2.91405	0.000654228	0.177341	0.00666873	0.089753	1	0.222867
TRINITY_DN32260_c0_g1_i1	-1.03239	-0.726866	0.248734	2.04541	1.65504	1.18816	0.000655925	0.00694595	0.400685	0.0898381	0.311744	1
TRINITY_DN35980_c0_g2_i8	3.86106	4.77414	0.859759	14.531	27.3627	1.81473	0.00065813	1.88868e-05	0.170103	0.0899923	0.00835778	0.843015
TRINITY_DN30547_c0_g1_i1	-1.11045	-0.344399	0.71216	2.15913	1.26962	1.63825	0.000667672	0.26284	0.0307868	0.0910907	1	0.459749
TRINITY_DN32387_c0_g1_i4	6.9391	8.03602	1.06132	122.71	262.472	2.08684	0.000668347	1.36946e-06	0.112196	0.0910907	0.00113737	0.742518
TRINITY_DN36367_c0_g1_i1	-1.84198	-1.00093	0.788722	3.58502	2.00129	1.72754	0.000676962	0.00183153	0.133561	0.0920644	0.160401	0.792333
TRINITY_DN20808_c2_g1_i1	-0.931517	-0.454942	0.4203	1.90728	1.37073	1.33821	0.000677699	0.0676587	0.102824	0.0920644	0.780237	0.727688
TRINITY_DN25096_c0_g1_i3	6.96914	5.82094	-1.16014	125.291	56.53	2.23479	0.00068113	0.0324576	0.245477	0.0923801	0.604554	0.92855
TRINITY_DN32143_c3_g3_i5	-0.866527	-1.15812	-0.349342	1.82327	2.23166	1.27398	0.00068531	4.18582e-06	0.179285	0.0927961	0.00273337	0.859502
TRINITY_DN22961_c0_g2_i1	-0.910589	-0.858202	-0.0113476	1.87981	1.81278	1.0079	0.000687008	0.013892	0.974547	0.0928753	0.428088	1
TRINITY_DN31238_c4_g2_i2	8.17568	9.98673	1.7712	289.151	1014.62	3.41337	0.000691159	1.07687e-16	0.0434149	0.0932852	1.1515e-12	0.526493
TRINITY_DN23504_c0_g1_i3	-6.61117	0.438118	7.00315	97.7599	1.35484	128.28	0.000693285	0.706376	3.28143e-05	0.093421	1	0.00708105
TRINITY_DN27376_c0_g1_i2	7.32031	7.41827	0.0704037	159.821	171.049	1.05001	0.000697384	0.000223794	0.956161	0.0938218	0.0431176	1
TRINITY_DN21961_c0_g4_i2	-1.32049	-0.252509	1.01235	2.49751	1.19128	2.01719	0.000699918	0.461084	0.00479174	0.094011	1	0.186248
TRINITY_DN21985_c0_g1_i1	-1.61197	-0.808926	0.746539	3.05669	1.75191	1.67776	0.000705043	0.0522479	0.106052	0.0945471	0.711477	0.733822
TRINITY_DN12232_c0_g2_i1	-3.53212	-0.792085	2.66609	11.5684	1.73157	6.34706	0.000710242	0.465852	0.00657238	0.0950915	1	0.221038
TRINITY_DN25140_c0_g1_i1	-1.10358	-0.77769	0.26922	2.14887	1.71438	1.20516	0.000712598	0.00106767	0.377238	0.095254	0.116794	1
TRINITY_DN16968_c0_g1_i1	-2.14714	-0.344868	1.75216	4.42949	1.27003	3.36863	0.000713765	0.474119	0.00562518	0.0952573	1	0.202196
TRINITY_DN29960_c0_g1_i4	6.87568	4.28798	-2.59688	117.432	19.5348	6.04976	0.000715914	0.288716	0.0232403	0.0953915	1	0.406225
TRINITY_DN28674_c0_g1_i1	-1.12359	-1.38441	-0.320503	2.17889	2.61065	1.24877	0.000720413	4.26655e-06	0.347281	0.0958379	0.00275007	0.978824
TRINITY_DN34563_c0_g2_i4	8.48779	10.0583	1.51194	358.986	1066.24	2.85193	0.000722377	1.95211e-10	0.140312	0.0959461	6.67966e-07	0.805519
TRINITY_DN26826_c0_g1_i1	-1.10355	-0.417087	0.632557	2.14883	1.33523	1.55031	0.000729348	0.0824454	0.0418432	0.0967181	0.838809	0.52054
TRINITY_DN60813_c0_g1_i1	-1.21801	-0.45993	0.702287	2.32626	1.37547	1.62708	0.000731454	0.049342	0.0354923	0.0968433	0.698248	0.486924
TRINITY_DN25550_c0_g1_i2	-5.13626	-1.69267	3.37976	35.1697	3.23255	10.409	0.00074198	0.103378	0.0322705	0.0978493	0.898464	0.468405
TRINITY_DN32430_c0_g2_i4	-5.13627	-0.753512	4.34019	35.1698	1.68589	20.2548	0.000742459	0.544869	0.0206689	0.0978493	1	0.38569
TRINITY_DN34308_c0_g1_i2	1.91156	0.926746	-1.03575	3.76216	1.90098	2.05018	0.000742571	0.160178	0.0169005	0.0978493	1	0.351653
TRINITY_DN8838_c0_g1_i1	-1.57684	-0.630228	0.894096	2.98315	1.54781	1.85844	0.000745183	0.0274159	0.0457381	0.0980386	0.564581	0.537342
TRINITY_DN21629_c0_g1_i1	-0.981404	-1.06422	-0.142149	1.97439	2.09104	1.10355	0.000752308	0.000550404	0.616645	0.0987172	0.0786593	1
TRINITY_DN34159_c0_g1_i2	6.96586	6.12178	-0.869325	125.007	69.6369	1.82681	0.000752708	0.0206248	0.370585	0.0987172	0.503659	1
TRINITY_DN27643_c0_g1_i3	-6.68638	-6.66893	0	102.992	101.753	0	0.000753953	0.000578712	0	0.0987252	0.081692	0
TRINITY_DN21084_c0_g1_i1	-1.15317	-0.516131	0.581397	2.22402	1.43012	1.4963	0.000757219	0.0487891	0.0651419	0.0989947	0.695769	0.618649
TRINITY_DN32857_c0_g1_i1	-1.19237	-0.0862267	1.0505	2.28528	1.06159	2.07124	0.000758384	0.722924	0.00162341	0.0989947	1	0.10196
TRINITY_DN33480_c0_g1_i1	0.955053	-0.101124	-1.11484	1.93865	1.07261	2.16571	0.000763872	0.716962	3.01514e-05	0.0995552	1	0.0066186
TRINITY_DN32819_c1_g1_i12	5.0235	3.34465	-1.75377	32.5254	10.1587	3.37238	0.000765736	0.25066	0.209962	0.0996425	1	0.895898
TRINITY_DN35091_c0_g1_i4	-7.73808	-0.0616421	7.61687	213.498	1.04365	196.294	0.000769176	0.922122	0.000320932	0.0997904	1	0.0375356
TRINITY_DN30681_c0_g1_i2	-0.841553	-0.296566	0.488962	1.79198	1.22822	1.40343	0.000769265	0.181559	0.0406292	0.0997904	1	0.513965
TRINITY_DN29315_c0_g1_i6	8.43688	8.67734	0.204233	346.54	409.394	1.15207	0.000777667	0.000187572	0.875547	0.10071	0.0384788	1
TRINITY_DN33684_c0_g1_i1	-1.15973	-0.43157	0.673302	2.23416	1.3487	1.59472	0.000778768	0.0654525	0.035405	0.10071	0.772891	0.486742
TRINITY_DN30805_c0_g1_i2	1.5962	1.64453	-0.00321675	3.02347	3.12646	1.00223	0.000787342	0.0437985	0.994721	0.101661	0.669891	1
TRINITY_DN242_c0_g1_i1	-0.836485	-0.134688	0.642357	1.78569	1.09786	1.56088	0.000799719	0.57448	0.00723644	0.103099	1	0.2335
TRINITY_DN35861_c0_g1_i18	-4.04821	1.1993	5.19484	16.5437	2.29628	36.627	0.000801648	0.0324991	3.54059e-07	0.103189	0.604654	0.000172428
TRINITY_DN19629_c0_g1_i2	-6.69731	-0.642512	6.02757	103.775	1.56105	65.2347	0.000816824	0.675289	0.0373992	0.10498	1	0.497923
TRINITY_DN29789_c0_g2_i1	-4.15099	-0.639093	3.46792	17.7653	1.55735	11.0649	0.000827943	0.534096	0.0264929	0.106246	1	0.430544
TRINITY_DN35276_c0_g1_i7	5.05085	4.22783	-0.853113	33.1479	18.7371	1.80639	0.000835895	0.0324032	0.388687	0.107101	0.6039	1
TRINITY_DN31970_c0_g1_i1	-0.940911	-0.918267	-0.0343645	1.91974	1.88984	1.02411	0.000843802	0.000729017	0.901943	0.107948	0.093779	1
TRINITY_DN30759_c0_g1_i2	-6.46131	-0.0616085	6.33138	88.115	1.04363	80.5258	0.000849138	0.939533	0.0158028	0.108436	1	0.340874
TRINITY_DN14499_c0_g1_i3	-6.40038	-1.27855	5.0722	84.471	2.42594	33.6423	0.000851278	0.230473	0.024423	0.108436	1	0.414274
TRINITY_DN29689_c0_g1_i10	-6.40038	-2.86015	3.69056	84.471	7.26089	12.9113	0.000851512	0.0735583	0.367766	0.108436	0.806623	0.998308
TRINITY_DN35267_c0_g1_i1	1.03901	0.417998	-0.681444	2.05482	1.33607	1.60374	0.000857364	0.176317	0.0107619	0.109015	1	0.284897
TRINITY_DN13959_c0_g2_i1	-6.54391	-1.40791	5.1043	93.3067	2.65352	34.399	0.000859215	0.293064	0.0331347	0.109084	1	0.473342
TRINITY_DN35546_c0_g1_i1	-1.59366	-0.5644	0.975444	3.01813	1.47877	1.96625	0.000862613	0.0432259	0.0305728	0.109349	0.666736	0.458705
TRINITY_DN45932_c0_g1_i1	-1.98638	-0.706715	1.22752	3.96242	1.63208	2.34164	0.000888588	0.0166127	0.0298159	0.11247	0.459988	0.453655
TRINITY_DN30869_c0_g1_i3	-6.44917	-0.924344	5.49494	87.3763	1.89782	45.0963	0.000911034	0.479361	0.0190459	0.115101	1	0.371682
TRINITY_DN35619_c0_g1_i2	-1.8931	-0.851783	0.989084	3.71432	1.80473	1.98492	0.000912135	0.00810709	0.0711165	0.115101	0.336158	0.637054
TRINITY_DN26134_c0_g1_i1	-2.22753	-0.376913	1.79979	4.6833	1.29856	3.48169	0.000917317	0.270285	0.00520542	0.115471	1	0.194114
TRINITY_DN27280_c0_g1_i3	8.42508	4.11157	-4.36034	343.718	17.2864	20.5397	0.000918784	0.34159	0.00484949	0.115471	1	0.187504
TRINITY_DN30495_c0_g1_i1	6.78243	4.71056	-2.09141	110.081	26.1831	4.26165	0.000919214	0.224711	0.0890879	0.115471	1	0.69193
TRINITY_DN35747_c0_g3_i1	8.50427	8.79599	0.254515	363.112	444.483	1.19293	0.00092274	0.000185469	0.858578	0.115679	0.0382308	1
TRINITY_DN27253_c0_g1_i11	-4.48919	-0.864483	3.53164	22.4585	1.82069	11.5645	0.000925064	0.420788	0.0338058	0.115679	1	0.477774
TRINITY_DN30517_c0_g1_i1	-0.884407	-0.792677	0.036683	1.84601	1.73229	1.02575	0.000925457	0.00106042	0.890814	0.115679	0.116747	1
TRINITY_DN35016_c0_g2_i7	4.81593	-0.13577	-4.98101	28.1668	1.09868	31.5815	0.000926417	1	1.46409e-05	0.115679	1	0.00373876
TRINITY_DN30227_c0_g1_i1	-1.73141	-0.901475	0.776359	3.32053	1.86797	1.7128	0.000939841	0.0179854	0.126608	0.11718	0.473118	0.775541
TRINITY_DN35335_c1_g2_i1	-1.07312	-0.818116	0.188535	2.10398	1.7631	1.13961	0.000948253	0.0271028	0.582844	0.118052	0.560674	1
TRINITY_DN13221_c0_g1_i1	-2.12966	-0.59925	1.47502	4.37613	1.51493	2.77988	0.000960493	0.170051	0.0153017	0.119397	1	0.336423
TRINITY_DN35432_c0_g1_i3	-1.55713	-0.76125	0.743607	2.94268	1.69496	1.67436	0.000966158	0.00145729	0.0853183	0.119767	0.141037	0.680141
TRINITY_DN25955_c0_g1_i3	-6.4735	0.474683	6.91857	88.8623	1.38961	120.975	0.000966339	0.783678	0.000725716	0.119767	1	0.0619292
TRINITY_DN43294_c0_g1_i1	-3.21538	0.218748	3.38107	9.28809	1.16372	10.4185	0.000971639	0.765051	0.000148633	0.120245	1	0.0217155
TRINITY_DN3672_c0_g1_i1	-2.032	-0.386191	1.59766	4.08973	1.30694	3.02653	0.000973269	0.215054	0.00685251	0.120269	1	0.226279
TRINITY_DN22861_c0_g1_i1	-2.49445	-0.618124	1.81927	5.63513	1.53488	3.52903	0.000979197	0.328332	0.0111721	0.120753	1	0.291219
TRINITY_DN12253_c0_g1_i1	-1.04924	-0.757979	0.229763	2.06943	1.69112	1.17264	0.000981884	0.0195336	0.418699	0.120753	0.492412	1
TRINITY_DN30894_c0_g1_i3	-4.56289	-2.68955	1.79716	23.6356	6.45114	3.47536	0.000983893	0.0116775	0.333675	0.120753	0.39923	0.969428
TRINITY_DN21452_c0_g1_i1	-6.3867	-1.58997	4.74119	83.6734	3.01043	26.7449	0.000986475	0.156019	0.0443792	0.120753	1	0.530823
TRINITY_DN29746_c0_g1_i2	-6.3867	-6.36956	0	83.6735	82.6856	0	0.000986633	0.000753959	0	0.120753	0.0959996	0
TRINITY_DN30883_c0_g1_i2	-0.8239	-0.448934	0.318469	1.77018	1.36503	1.24701	0.000986972	0.0573754	0.173809	0.120753	0.73574	0.848531
TRINITY_DN34954_c2_g1_i21	-6.3867	-2.84029	3.69084	83.6735	7.16162	12.9138	0.000987323	0.077683	0.368177	0.120753	0.8225	0.998308
TRINITY_DN11634_c0_g2_i1	4.8029	4.24195	-0.594122	27.9137	18.9214	1.50955	0.000990714	0.0122007	0.448673	0.12099	0.404658	1
TRINITY_DN34315_c0_g1_i7	6.82124	5.07855	-1.7574	113.083	33.7905	3.38089	0.00100051	0.0807781	0.0660967	0.122008	0.832663	0.62243
TRINITY_DN35680_c0_g1_i11	-5.05999	-1.51377	3.50771	33.3586	2.85554	11.3743	0.00100982	0.344254	0.150801	0.122963	1	0.80757
TRINITY_DN6196_c0_g1_i1	0.944471	0.328492	-0.671401	1.92448	1.2557	1.59262	0.00101249	0.256032	0.0101439	0.123109	1	0.276551
TRINITY_DN35957_c0_g1_i7	8.50154	7.66173	-0.895607	362.426	202.494	1.86039	0.00102007	0.00387756	0.535836	0.12385	0.233643	1
TRINITY_DN15145_c0_g1_i1	-1.47354	0.0111587	1.43518	2.77702	1.00776	2.70416	0.00102967	0.982016	0.000977379	0.124834	1	0.0740454
TRINITY_DN41146_c0_g1_i1	-0.867877	-1.21112	-0.406322	1.82498	2.31518	1.3253	0.00103235	0.000170571	0.193422	0.124977	0.0365696	0.878918
TRINITY_DN18909_c0_g1_i1	-1.00086	-0.496237	0.449692	2.00119	1.41053	1.36575	0.00103419	0.0386315	0.118109	0.125018	0.639701	0.758207
TRINITY_DN45959_c0_g1_i1	1.00118	0.056947	-1.00143	2.00163	1.04026	2.00199	0.00104017	0.867639	0.000316471	0.125559	1	0.0371602
TRINITY_DN35280_c0_g1_i2	-7.60898	0.250996	7.79573	195.223	1.19003	222.203	0.00104618	0.968288	0.00232641	0.126102	1	0.124825
TRINITY_DN34399_c2_g1_i4	-1.13867	-0.842665	0.241295	2.20177	1.79336	1.18205	0.0010602	0.000252889	0.449037	0.127473	0.0470286	1
TRINITY_DN11299_c0_g1_i1	-6.32294	-0.597235	5.69282	80.0562	1.51281	51.7262	0.00106061	0.558042	0.00487598	0.127473	1	0.18812
TRINITY_DN33147_c0_g1_i3	-1.2592	-0.29269	0.910255	2.39363	1.22492	1.87938	0.00106753	0.364862	0.01248	0.128121	1	0.30464
TRINITY_DN28880_c0_g1_i3	-1.01943	-0.564526	0.396969	2.02712	1.4789	1.31674	0.00107202	0.012873	0.169655	0.128474	0.41664	0.84187
TRINITY_DN28570_c0_g3_i2	-1.68349	-0.314436	1.31546	3.21205	1.24353	2.48881	0.0010869	0.492922	0.0123732	0.130037	1	0.303594
TRINITY_DN23082_c0_g1_i1	-1.32877	-0.720223	0.556795	2.51189	1.64744	1.471	0.00108817	0.00562212	0.149885	0.130037	0.281415	0.807327
TRINITY_DN15151_c0_g2_i1	-0.822987	-0.376685	0.389381	1.76906	1.29836	1.30983	0.00109733	0.0950885	0.103816	0.130943	0.873011	0.730142
TRINITY_DN35238_c0_g1_i1	2.10286	0.962384	-1.17509	4.2956	1.94853	2.25806	0.00114726	0.264256	0.0528187	0.136705	1	0.571484
TRINITY_DN35596_c0_g1_i2	1.55326	-0.289744	-1.88768	2.93479	1.22242	3.70039	0.00115121	0.751155	0.0273115	0.136981	1	0.436568
TRINITY_DN23606_c0_g1_i6	-2.02162	-0.150281	1.79912	4.0604	1.10979	3.48007	0.00115453	0.825672	0.0107061	0.13718	1	0.284075
TRINITY_DN40960_c0_g1_i1	-0.886294	-0.57831	0.249719	1.84842	1.4931	1.18898	0.00116094	0.0242226	0.327993	0.137745	0.534735	0.965451
TRINITY_DN16203_c0_g1_i1	-1.20227	-0.529508	0.612754	2.30102	1.44344	1.52918	0.00116883	0.124371	0.100773	0.138485	0.940978	0.724059
TRINITY_DN33557_c0_g1_i2	-2.64224	-0.700519	1.89421	6.243	1.62509	3.71719	0.00117292	0.323799	0.0193581	0.138772	1	0.373846
TRINITY_DN29514_c0_g1_i1	-1.00841	-0.621483	0.330254	2.01169	1.53846	1.25723	0.00117612	0.0186966	0.252154	0.138936	0.482032	0.940778
TRINITY_DN20435_c0_g1_i1	-6.26824	-1.9945	4.25904	77.0777	3.98478	19.1469	0.00117764	0.129184	0.0873311	0.138936	0.950023	0.685482
TRINITY_DN33427_c0_g1_i3	-1.48104	-0.808367	0.620482	2.7915	1.75123	1.53739	0.00118262	0.0274249	0.18122	0.139327	0.564629	0.862161
TRINITY_DN25591_c0_g1_i5	-1.5762	-0.311896	1.21232	2.98184	1.24134	2.3171	0.00118966	0.472503	0.013405	0.139959	1	0.313984
TRINITY_DN28704_c0_g1_i1	-1.70113	-0.147167	1.49383	3.25155	1.10739	2.81635	0.00119335	0.74355	0.00181106	0.140196	1	0.108837
TRINITY_DN13026_c0_g1_i3	8.2539	7.58757	-0.669319	305.261	192.348	1.59032	0.00119896	0.00552816	0.643267	0.140656	0.278833	1
TRINITY_DN35726_c0_g1_i3	-7.2029	2.25641	9.40943	147.329	4.77801	680.017	0.00120812	0.0251495	2.00609e-16	0.141431	0.542196	8.51367e-13
TRINITY_DN8426_c0_g1_i1	-2.24209	-0.739705	1.44061	4.73082	1.66983	2.71436	0.00120896	0.237459	0.0515986	0.141431	1	0.566046
TRINITY_DN33158_c0_g1_i2	-1.19932	-0.754605	0.389854	2.29631	1.68717	1.31026	0.001216	0.0235121	0.285206	0.142055	0.529433	0.960714
TRINITY_DN13647_c0_g2_i1	6.82456	6.95413	0.0882272	113.344	123.994	1.06306	0.00122568	0.000334946	0.964065	0.142533	0.0575354	1
TRINITY_DN31252_c0_g1_i1	0.829743	0.582822	-0.304426	1.77737	1.49778	1.23493	0.00122673	0.0162387	0.184546	0.142533	0.455451	0.864939
TRINITY_DN33090_c0_g1_i4	-6.29479	1.60248	7.84968	78.5093	3.03664	230.669	0.00122854	0.245375	8.31005e-05	0.142533	1	0.0142975
TRINITY_DN31972_c0_g2_i6	-6.29479	-1.38234	4.89784	78.5093	2.6069	29.8125	0.00122859	0.284901	0.0419181	0.142533	1	0.521156
TRINITY_DN35953_c0_g2_i5	1.31738	0.590492	-0.777697	2.49212	1.50576	1.71439	0.00122863	0.276437	0.114682	0.142533	1	0.748967
TRINITY_DN34762_c0_g17_i6	-6.47366	-0.475622	5.93722	88.8719	1.39052	61.2747	0.00123081	0.727306	0.00965689	0.142588	1	0.268447
TRINITY_DN31922_c0_g1_i1	-1.21955	-0.109462	1.05232	2.32874	1.07883	2.07386	0.00124428	0.719354	0.00312836	0.143948	1	0.147049
TRINITY_DN35030_c0_g1_i2	-7.49671	-7.48092	0	180.608	178.641	0	0.00124937	0.00112267	0	0.144165	0.11985	0
TRINITY_DN34132_c0_g1_i2	-7.49671	-1.60539	5.89032	180.607	3.04279	59.3147	0.00124961	0.353948	0.0281793	0.144165	1	0.442343
TRINITY_DN33341_c0_g1_i5	-7.62572	-1.60956	5.96208	197.502	3.05159	62.3397	0.00125285	0.341102	0.0163759	0.144339	1	0.34617
TRINITY_DN34189_c0_g1_i12	7.31761	4.93503	-2.41792	159.521	30.5909	5.34399	0.00126065	0.183169	0.0679863	0.144852	1	0.629601
TRINITY_DN35171_c1_g5_i4	8.22523	0	-6.20742	299.256	0	73.8956	0.00126078	0	0.000648316	0.144852	0	0.0577215
TRINITY_DN29501_c0_g3_i1	-4.52084	-1.20616	3.28038	22.9567	2.30722	9.71615	0.00126335	0.253204	0.0247971	0.144895	1	0.416739
TRINITY_DN32139_c1_g1_i11	1.42685	0.968648	-0.506963	2.68859	1.95701	1.42106	0.00126463	0.0437467	0.147718	0.144895	0.669845	0.807327
TRINITY_DN23903_c0_g1_i1	6.681	6.45583	-0.264672	102.608	87.7809	1.20136	0.00128749	0.0189206	0.842268	0.147306	0.483903	1
TRINITY_DN35360_c0_g1_i3	1.46556	0.39708	-1.12219	2.7617	1.31684	2.17677	0.0012892	0.434059	0.00293446	0.147306	1	0.143027
TRINITY_DN35940_c0_g1_i3	-1.03508	-0.688454	0.292171	2.04923	1.61156	1.22448	0.00129764	0.0102933	0.328493	0.148068	0.379302	0.966
TRINITY_DN35998_c1_g2_i5	1.99215	1.74798	-0.288778	3.97828	3.35888	1.22161	0.00130446	0.00959724	0.582934	0.148642	0.364717	1
TRINITY_DN25518_c0_g9_i2	2.46229	4.38701	1.87592	5.51091	20.9229	3.67035	0.00131249	4.05819e-14	4.21272e-05	0.149354	2.89295e-10	0.00865083
TRINITY_DN26510_c2_g1_i3	-2.63156	-0.649718	1.93566	6.19695	1.56886	3.82553	0.00131709	0.372071	0.0196835	0.149539	1	0.376931
TRINITY_DN32014_c0_g1_i2	-7.59263	-1.11689	6.47869	193.023	2.1688	89.1825	0.00131771	0.50361	0.0133996	0.149539	1	0.313984
TRINITY_DN35845_c0_g1_i18	8.24286	7.25737	-1.01774	302.934	152.998	2.02475	0.00132148	0.000450785	0.374604	0.149763	0.0700088	1
TRINITY_DN41516_c0_g1_i1	-1.20345	-0.241388	0.907381	2.3029	1.18213	1.87564	0.00133525	0.382513	0.0120557	0.151012	1	0.300707
TRINITY_DN16098_c0_g2_i1	1.27932	1.04171	-0.29676	2.42724	2.05866	1.22838	0.00133899	0.007526	0.379735	0.151012	0.324662	1
TRINITY_DN33305_c0_g1_i1	-1.54442	-0.742835	0.746003	2.91688	1.67346	1.67714	0.00133969	0.0434316	0.105987	0.151012	0.668102	0.733597
TRINITY_DN31704_c0_g1_i1	7.03345	7.23523	0.181643	131.002	150.668	1.13417	0.00133974	0.000408854	0.87133	0.151012	0.0658663	1
TRINITY_DN19982_c0_g1_i1	1.57947	-0.812225	-2.44455	2.9886	1.75592	5.44355	0.00134175	0.0736531	1.23141e-08	0.151035	0.807146	9.22236e-06
TRINITY_DN21590_c0_g1_i1	-1.21949	-0.342437	0.822665	2.32864	1.2679	1.76867	0.00134833	0.190483	0.0224879	0.15157	1	0.400513
TRINITY_DN32901_c1_g1_i4	1.09061	0.786729	-0.357702	2.12965	1.72516	1.28138	0.00136355	0.0128401	0.217673	0.153075	0.416059	0.902524
TRINITY_DN29846_c0_g1_i1	-2.13666	-0.317155	1.77247	4.39743	1.24587	3.41639	0.00136975	0.372807	0.00624397	0.153564	1	0.215551
TRINITY_DN32246_c0_g1_i3	1.59146	0.43875	-1.19977	3.01354	1.35543	2.29703	0.00137312	0.282424	0.00962495	0.153608	1	0.268141
TRINITY_DN22507_c0_g1_i1	1.10112	-0.172348	-1.33129	2.14521	1.12689	2.51627	0.00137382	0.640386	2.14659e-05	0.153608	1	0.0050745
TRINITY_DN35845_c0_g1_i17	9.22194	8.19668	-1.06478	597.147	293.392	2.09185	0.001377	1.21751e-06	0.399944	0.153757	0.0010415	1
TRINITY_DN12459_c0_g1_i2	2.32569	-0.0101549	-2.38982	5.01305	1.00706	5.2409	0.00138509	1	0.000116008	0.154247	1	0.0184953
TRINITY_DN35953_c0_g2_i1	-1.80732	-0.709922	1.03591	3.49991	1.63572	2.0504	0.00138662	0.138573	0.0959245	0.154247	0.974315	0.707435
TRINITY_DN16085_c0_g1_i3	6.86365	4.44244	-2.43678	116.457	21.7424	5.41432	0.00138693	0.293422	0.0451821	0.154247	1	0.534402
TRINITY_DN2952_c0_g2_i1	-1.79774	-0.718777	1.02429	3.47676	1.64579	2.03396	0.00139153	0.151895	0.0814207	0.154304	1	0.669144
TRINITY_DN35199_c0_g1_i6	-1.64625	-0.236965	1.35078	3.1302	1.17851	2.5505	0.00139207	0.609211	0.000206054	0.154304	1	0.0273033
TRINITY_DN27091_c0_g1_i3	-4.80596	0.618839	5.38208	27.973	1.53564	41.7029	0.00139423	0.508478	1.42137e-05	0.154304	1	0.0036506
TRINITY_DN10815_c0_g1_i1	6.63097	0	-6.65101	99.1107	0	100.497	0.00139484	0	6.77725e-05	0.154304	0	0.0125097
TRINITY_DN26971_c0_g2_i1	-1.64478	-1.40255	0.185567	3.12699	2.64369	1.13726	0.00140921	0.00322345	0.722791	0.155687	0.213118	1
TRINITY_DN30686_c0_g1_i6	-7.55877	-7.54149	0	188.546	186.301	0	0.00141199	0.00119496	0	0.155787	0.124875	0
TRINITY_DN24723_c0_g1_i1	-1.4425	-0.248006	1.14212	2.71791	1.18756	2.20705	0.00141495	0.446794	0.00814643	0.155908	1	0.249151
TRINITY_DN32430_c0_g2_i3	-2.47953	-0.649275	1.77902	5.57714	1.56838	3.43194	0.00141842	0.138403	0.020112	0.156084	0.974202	0.381029
TRINITY_DN65126_c0_g1_i1	-1.07513	-1.11482	-0.103681	2.10692	2.16568	1.07451	0.00142151	0.00520116	0.795187	0.156218	0.268029	1
TRINITY_DN17652_c0_g2_i1	6.5987	0	-6.61734	96.9182	0	98.1788	0.00142675	0	6.06447e-05	0.156588	0	0.0114751
TRINITY_DN25152_c0_g1_i1	-0.872694	-0.215936	0.602391	1.83108	1.16146	1.51823	0.00143869	0.367029	0.0222339	0.157691	1	0.398858
TRINITY_DN34715_c0_g1_i5	-6.2389	-1.22115	4.96407	75.5262	2.33132	31.2128	0.00144589	0.295451	0.0286578	0.158272	1	0.446183
TRINITY_DN33514_c0_g1_i9	-6.3347	-3.69929	2.58767	80.7114	12.9896	6.01126	0.0014506	0.013804	0.5968	0.158579	0.427071	1
TRINITY_DN32556_c0_g1_i3	8.14147	7.46978	-0.730183	282.376	177.267	1.65885	0.00145352	0.000142812	0.514347	0.15869	0.0319965	1
TRINITY_DN35662_c0_g1_i3	7.0855	6.37963	-0.761104	135.815	83.2647	1.69479	0.00146117	0.0556355	0.58952	0.159317	0.726499	1
TRINITY_DN22961_c0_g1_i3	-1.12247	-1.01998	0.0402188	2.17719	2.02789	1.02827	0.00150436	0.0162162	0.926062	0.163783	0.45497	1
TRINITY_DN19206_c0_g1_i2	-1.21175	-0.458452	0.69251	2.31619	1.37407	1.61609	0.00150606	0.205595	0.0624573	0.163783	1	0.60761
TRINITY_DN29099_c2_g1_i4	-1.92333	-0.970293	0.905547	3.79297	1.95924	1.87325	0.00151813	0.106304	0.201683	0.164839	0.90496	0.887888
TRINITY_DN32903_c1_g5_i8	4.36603	1.01288	-3.38015	20.6208	2.01794	10.4118	0.00152106	0.799704	0.000809601	0.164839	1	0.0663439
TRINITY_DN25103_c0_g1_i4	-0.928999	-0.430154	0.440852	1.90395	1.34738	1.35741	0.00152169	0.0830087	0.10233	0.164839	0.841612	0.726672
TRINITY_DN41104_c0_g1_i1	-1.25007	0.251462	1.44932	2.37852	1.19041	2.73079	0.00152677	0.483712	0.000300826	0.165174	1	0.0360838
TRINITY_DN34289_c0_g1_i2	-7.52412	-7.50681	0	184.071	181.876	0	0.00153014	0.00126848	0	0.165325	0.128905	0
TRINITY_DN34786_c0_g2_i3	-1.03062	-0.422748	0.553579	2.04291	1.34048	1.46772	0.00153805	0.154603	0.0843178	0.165965	1	0.676249
TRINITY_DN8069_c0_g1_i1	-3.56669	-0.0840328	3.41791	11.849	1.05998	10.6879	0.00155284	0.904207	0.00257807	0.167344	1	0.133351
TRINITY_DN28371_c0_g3_i2	-7.40633	-2.70092	4.68634	169.64	6.50217	25.7471	0.00155762	0.157045	0.139294	0.167643	1	0.80391
TRINITY_DN27499_c0_g1_i2	-6.225	-0.457395	5.73183	74.8015	1.37306	53.1439	0.00158695	0.633202	0.00162135	0.170446	1	0.101903
TRINITY_DN25183_c0_g1_i8	-6.18316	0.952186	7.10733	72.6635	1.9348	137.885	0.00158776	0.321342	9.14995e-06	0.170446	1	0.00259701
TRINITY_DN35822_c0_g1_i2	-1.59371	-0.564362	0.981422	3.01825	1.47873	1.97441	0.00159992	0.0463828	0.0423516	0.171531	0.68578	0.523137
TRINITY_DN31365_c0_g1_i3	-1.36727	-1.13718	0.174794	2.57981	2.1995	1.1288	0.00160473	0.00765294	0.688383	0.171825	0.327183	1
TRINITY_DN31908_c0_g1_i4	1.55117	2.10402	0.493273	2.93055	4.29907	1.40763	0.00161321	5.05044e-08	0.172947	0.172497	7.71491e-05	0.846472
TRINITY_DN32625_c2_g1_i2	3.32599	2.3415	-1.04573	10.0282	5.06829	2.06441	0.00161514	0.0363057	0.0301098	0.172497	0.625651	0.455981
TRINITY_DN35279_c0_g1_i2	0.920847	-0.0580542	-1.03876	1.89323	1.04106	2.05446	0.00161922	0.811633	0.000108929	0.172712	1	0.0176209
TRINITY_DN34969_c0_g1_i3	1.33255	0.231046	-1.14527	2.51848	1.17369	2.21188	0.00162557	0.680637	0.00666138	0.173168	1	0.222829
TRINITY_DN34089_c0_g1_i8	6.61351	5.05936	-1.57759	97.9185	33.344	2.98471	0.0016338	0.119475	0.134424	0.173709	0.938228	0.794599
TRINITY_DN55705_c1_g1_i1	-1.14882	-0.551773	0.54535	2.21732	1.46589	1.45937	0.00163635	0.0240428	0.112632	0.173709	0.533934	0.743758
TRINITY_DN11421_c0_g1_i1	-1.95661	-0.294274	1.60206	3.88149	1.22627	3.03576	0.0016369	0.503238	0.00553621	0.173709	1	0.200813
TRINITY_DN32084_c0_g1_i3	-1.09116	-0.655928	0.371389	2.13045	1.57563	1.2936	0.00165368	0.0899699	0.318652	0.174987	0.853636	0.961188
TRINITY_DN32903_c1_g5_i5	7.00493	4.28798	-2.7392	128.439	19.5348	6.67698	0.00165425	0.288714	0.0298363	0.174987	1	0.453689
TRINITY_DN32457_c0_g1_i1	-6.25289	-0.72286	5.48717	76.262	1.65045	44.8541	0.00165524	0.547116	0.0125367	0.174987	1	0.305112
TRINITY_DN25566_c0_g1_i1	8.17826	4.62105	-3.56344	289.669	24.608	11.8223	0.00165805	0.255818	0.0242737	0.175063	1	0.413448
TRINITY_DN28989_c0_g1_i31	0.978164	1.39989	0.360273	1.96996	2.63881	1.28367	0.0016763	2.72313e-05	0.181967	0.176627	0.0108782	0.862161
TRINITY_DN20656_c0_g1_i3	-1.12888	-0.812565	0.267262	2.1869	1.75633	1.20352	0.00167912	0.0166857	0.480039	0.176627	0.461229	1
TRINITY_DN15104_c0_g1_i1	-0.853885	0.0799139	0.875935	1.80736	1.05695	1.8352	0.00167922	0.741835	0.000564171	0.176627	1	0.0529671
TRINITY_DN27801_c0_g1_i2	6.65402	4.28797	-2.37899	100.707	19.5347	5.20171	0.00168252	0.288741	0.0419582	0.176752	1	0.521289
TRINITY_DN33541_c0_g1_i6	-0.802569	-0.609842	0.131141	1.7442	1.52609	1.09516	0.00168768	0.0253397	0.622962	0.17707	0.543509	1
TRINITY_DN28912_c0_g1_i1	-1.54139	-0.379799	1.10389	2.91075	1.30116	2.14933	0.00170499	0.315151	0.0138504	0.178662	1	0.31987
TRINITY_DN35352_c0_g1_i9	6.57907	6.95963	0.32311	95.6085	124.468	1.25102	0.00171539	0.000777644	0.706393	0.179179	0.0976839	1
TRINITY_DN22863_c0_g1_i3	8.13083	5.25879	-2.86764	280.3	38.2871	7.29872	0.00171586	0.152196	0.0700984	0.179179	1	0.635083
TRINITY_DN35970_c0_g3_i1	-2.35214	3.82902	6.11167	5.10582	14.2118	69.1506	0.00171636	0.000455775	1.36134e-10	0.179179	0.0703769	1.55545e-07
TRINITY_DN35212_c0_g1_i8	-7.4886	-0.217366	7.2193	179.594	1.16261	149.013	0.00172147	0.86316	0.00923332	0.179487	1	0.262959
TRINITY_DN5634_c0_g2_i1	-0.973313	-0.332922	0.587616	1.96334	1.25956	1.50276	0.00172804	0.211061	0.0536353	0.179947	1	0.575396
TRINITY_DN23469_c0_g1_i1	-0.753722	-0.727491	-0.0315505	1.68614	1.65576	1.02211	0.00173215	0.0018108	0.892823	0.18015	0.159523	1
TRINITY_DN11505_c0_g1_i1	6.6577	5.28261	-1.40793	100.964	38.9246	2.65356	0.00173704	0.0292718	0.127873	0.180167	0.577872	0.779096
TRINITY_DN31885_c0_g1_i2	1.75331	0.252494	-1.55866	3.3713	1.19126	2.94581	0.00173888	0.639286	0.00124394	0.180167	1	0.0860836
TRINITY_DN30526_c0_g4_i1	-6.34911	-6.33388	0	81.5216	80.6652	0	0.00173996	0.00141736	0	0.180167	0.138567	0
TRINITY_DN35796_c2_g2_i2	-1.36889	0.0530317	1.3654	2.58271	1.03744	2.57648	0.00174095	0.911015	0.00141727	0.180167	1	0.0939805
TRINITY_DN14916_c0_g1_i1	-1.84208	-1.12355	0.660942	3.58527	2.17882	1.58111	0.00174773	0.0437647	0.264251	0.180644	0.669845	0.949016
TRINITY_DN30942_c0_g1_i2	6.61549	6.31439	-0.375328	98.0528	79.5831	1.29713	0.00175118	0.0245538	0.766251	0.180777	0.539059	1
TRINITY_DN16741_c0_g1_i1	-1.46559	0.36412	1.77586	2.76177	1.2871	3.42443	0.00175794	0.257517	7.81909e-05	0.181137	1	0.0137718
TRINITY_DN58809_c0_g1_i1	-1.02501	-0.157179	0.811689	2.03498	1.1151	1.75526	0.00176063	0.530674	0.00928551	0.181137	1	0.263453
TRINITY_DN35657_c0_g1_i9	1.96453	0.930072	-1.09099	3.90286	1.90537	2.13021	0.00176242	0.127852	0.00307969	0.181137	0.946764	0.146338
TRINITY_DN34319_c0_g1_i1	-1.22246	-0.563909	0.603399	2.33345	1.47827	1.51929	0.00176336	0.0430801	0.112431	0.181137	0.665744	0.743217
TRINITY_DN11543_c0_g1_i1	-0.960596	-0.633908	0.269259	1.94611	1.55176	1.20519	0.00177664	0.0312552	0.330974	0.182195	0.594947	0.967246
TRINITY_DN32425_c0_g1_i4	-0.91215	-0.331504	0.524447	1.88185	1.25832	1.43838	0.00177802	0.214187	0.0615026	0.182195	1	0.60335
TRINITY_DN35697_c1_g1_i2	-0.945424	-0.557134	0.332782	1.92575	1.47134	1.25944	0.0017824	0.0251821	0.257787	0.182419	0.542204	0.946988
TRINITY_DN30681_c0_g1_i1	-0.817136	-0.342992	0.417287	1.7619	1.26838	1.33541	0.00179092	0.146392	0.0942785	0.183067	0.993769	0.705304
TRINITY_DN31250_c0_g1_i4	1.25672	0.566518	-0.747199	2.38952	1.48094	1.67853	0.00179644	0.142864	0.0226839	0.183406	0.985719	0.402235
TRINITY_DN25334_c0_g1_i1	3.15182	0.632467	-2.56466	8.88779	1.55021	5.91617	0.00180183	0.567437	0.0013061	0.183732	1	0.0884519
TRINITY_DN31912_c0_g1_i6	-7.45217	-0.708493	6.69835	175.117	1.6341	103.85	0.00182935	0.54636	6.21766e-05	0.18631	1	0.0116659
TRINITY_DN28880_c0_g1_i2	-1.16766	-0.436408	0.674973	2.24646	1.35323	1.59657	0.00184176	0.057277	0.0494664	0.187345	0.73574	0.555722
TRINITY_DN29710_c1_g1_i1	-1.40517	-1.43653	-0.0851056	2.64849	2.7067	1.06077	0.00184722	0.00112586	0.880754	0.187672	0.119938	1
TRINITY_DN27455_c0_g1_i2	7.95654	7.50834	-0.46499	248.402	182.069	1.38031	0.00185426	0.00445558	0.737123	0.188157	0.248998	1
TRINITY_DN20269_c0_g1_i1	-1.46922	-0.4788	0.937611	2.76873	1.39358	1.91535	0.00186408	0.0795825	0.0340435	0.188915	0.828224	0.479672
TRINITY_DN29610_c0_g1_i2	7.17752	8.25577	1.03379	144.76	305.656	2.04739	0.00186625	4.79824e-07	0.203459	0.188915	0.000476297	0.888294
TRINITY_DN35416_c1_g2_i7	8.22559	8.60653	0.337765	299.329	389.783	1.2638	0.00186908	6.65793e-08	0.756707	0.188972	9.65332e-05	1
TRINITY_DN21414_c0_g1_i1	-1.44167	-1.95092	-0.551187	2.71635	3.8662	1.46529	0.00187194	2.77169e-05	0.281126	0.189032	0.0109263	0.960714
TRINITY_DN28323_c0_g1_i2	6.70048	5.75448	-0.969562	104.003	53.9847	1.95825	0.00187546	0.035975	0.352822	0.189159	0.62301	0.985687
TRINITY_DN25389_c0_g1_i1	1.66648	0.880882	-0.837723	3.1744	1.8415	1.78723	0.00187926	0.162425	0.0595416	0.189313	1	0.596336
TRINITY_DN23816_c1_g1_i6	8.01349	9.1619	1.08365	258.405	572.805	2.11939	0.00188184	0.00480565	0.536879	0.189344	0.258713	1
TRINITY_DN38205_c0_g1_i1	1.35517	-0.103034	-1.52148	2.55827	1.07403	2.87086	0.00188493	0.842166	0.000479545	0.189426	1	0.0484009
TRINITY_DN25643_c0_g1_i1	1.28614	0.606614	-0.737054	2.43875	1.52268	1.66677	0.0019239	0.159715	0.0404218	0.19311	1	0.512697
TRINITY_DN41849_c0_g1_i1	-1.74037	-0.683814	0.997686	3.34121	1.60638	1.99679	0.00192813	0.189037	0.0608119	0.193242	1	0.600318
TRINITY_DN25513_c0_g4_i1	-0.753809	-0.396521	0.301425	1.68624	1.31633	1.23236	0.00192985	0.0795934	0.193075	0.193242	0.828224	0.878918
TRINITY_DN35952_c0_g1_i5	-1.69449	-0.521578	1.11473	3.23662	1.43552	2.16555	0.00193727	0.257145	0.030689	0.193752	1	0.45952
TRINITY_DN50877_c1_g1_i1	0.828123	-0.149176	-1.03822	1.77537	1.10894	2.05369	0.00196063	0.574388	6.82679e-05	0.195689	1	0.0125447
TRINITY_DN30114_c1_g1_i2	-1.21636	-0.490828	0.670059	2.3236	1.40525	1.59114	0.00196132	0.152122	0.0797694	0.195689	1	0.664268
TRINITY_DN27318_c0_g1_i1	-6.267	-0.740164	5.48263	77.0114	1.67037	44.7132	0.00196548	0.551555	0.0122118	0.195843	1	0.302375
TRINITY_DN23595_c0_g2_i1	-2.00659	-2.42629	-0.505949	4.01832	5.37508	1.42006	0.00196756	0.0265379	0.653307	0.195843	0.554375	1
TRINITY_DN34031_c5_g3_i6	-3.18631	-0.183428	2.93305	9.1028	1.13558	7.63725	0.00197647	0.838577	0.00212078	0.196238	1	0.118056
TRINITY_DN35132_c1_g1_i7	1.52889	0.327014	-1.25423	2.88564	1.25441	2.3854	0.00197736	0.625135	0.00444732	0.196238	1	0.178564
TRINITY_DN35596_c0_g1_i4	1.7284	0.992782	-0.792885	3.3136	1.99002	1.73254	0.00197859	0.089242	0.0846499	0.196238	0.850196	0.677327
TRINITY_DN30717_c0_g1_i5	-1.38151	-0.679716	0.645744	2.60541	1.60182	1.56455	0.00199203	0.0903494	0.122695	0.197337	0.855248	0.768918
TRINITY_DN35804_c0_g1_i4	8.19667	8.31123	0.0775475	293.389	317.635	1.05522	0.00199747	2.39844e-06	0.952437	0.197541	0.00178411	1
TRINITY_DN16620_c0_g1_i1	-0.862373	-0.00322999	0.803039	1.81803	1.00224	1.74477	0.00199884	0.979933	0.00344497	0.197541	1	0.154947
TRINITY_DN22431_c0_g1_i1	-0.795455	-0.901961	-0.164406	1.73562	1.8686	1.1207	0.00200414	0.000260248	0.497857	0.197728	0.0479799	1
TRINITY_DN35798_c0_g2_i1	6.51361	5.73645	-0.829369	91.3678	53.3144	1.77691	0.00200547	0.014215	0.379313	0.197728	0.430927	1
TRINITY_DN31454_c0_g1_i3	-2.02119	-0.751355	1.20405	4.0592	1.68337	2.30386	0.00202968	0.173682	0.0572759	0.199879	1	0.588592
TRINITY_DN10211_c0_g2_i1	-1.19752	-0.093875	1.04794	2.29345	1.06723	2.06758	0.0020337	0.771992	0.00377576	0.200039	1	0.162562
TRINITY_DN27011_c0_g2_i2	-6.16639	-2.40792	3.71018	71.8239	5.30709	13.0881	0.00203869	0.0812433	0.311802	0.200105	0.83472	0.960741
TRINITY_DN31649_c0_g1_i2	-6.16639	-1.37256	4.74119	71.8239	2.58931	26.7449	0.00203917	0.237398	0.0443767	0.200105	1	0.530823
TRINITY_DN9060_c0_g1_i1	-1.36316	-0.928256	0.372164	2.57248	1.90297	1.29429	0.00204211	0.109658	0.527449	0.200158	0.912004	1
TRINITY_DN51263_c0_g1_i1	-1.2742	-0.683514	0.536377	2.41864	1.60605	1.45033	0.00205633	0.0230256	0.184013	0.201315	0.523935	0.8642
TRINITY_DN34845_c0_g1_i1	-0.789886	-0.621884	0.111073	1.72894	1.53888	1.08003	0.0020787	0.0110407	0.659266	0.203267	0.392547	1
TRINITY_DN36225_c0_g1_i1	-1.51577	-0.696518	0.763496	2.85952	1.62059	1.6976	0.00208731	0.0667072	0.0990114	0.203639	0.779083	0.718809
TRINITY_DN27379_c0_g1_i1	-1.36358	-0.213918	1.09627	2.57323	1.15983	2.13802	0.0020887	0.437275	0.00905065	0.203639	1	0.260759
TRINITY_DN2695_c0_g1_i1	-1.03703	-0.464645	0.520974	2.052	1.37998	1.43492	0.00208987	0.165417	0.114024	0.203639	1	0.747487
TRINITY_DN35866_c0_g2_i2	-7.27628	-2.50974	4.75792	155.017	5.69518	27.0569	0.00209502	0.144202	0.107086	0.203639	0.989081	0.734423
TRINITY_DN34153_c0_g1_i1	-7.27628	0.634035	7.88963	155.017	1.5519	237.145	0.00209548	0.762177	0.000155218	0.203639	1	0.0223478
TRINITY_DN30883_c0_g1_i1	-1.04654	-0.489681	0.499363	2.06556	1.40413	1.41359	0.00209716	0.131549	0.132117	0.203639	0.9542	0.789811
TRINITY_DN35724_c0_g1_i16	6.82017	6.15697	-0.720986	112.999	71.3563	1.64831	0.00210353	0.011822	0.471697	0.20402	0.400674	1
TRINITY_DN16527_c0_g1_i1	1.26943	0.150701	-1.18583	2.41067	1.11011	2.27493	0.00211968	0.816466	0.0186428	0.205257	1	0.367838
TRINITY_DN34394_c0_g1_i4	-1.39258	-0.0411441	1.29782	2.62547	1.02893	2.45856	0.00212358	0.881453	0.00282172	0.205257	1	0.140884
TRINITY_DN31990_c0_g1_i1	1.84742	0.770171	-1.1196	3.59855	1.70547	2.17286	0.00212366	0.114999	0.040312	0.205257	0.926491	0.512289
TRINITY_DN33540_c0_g1_i3	6.50949	6.55785	-0.0105651	91.1073	94.2129	1.00735	0.00213287	0.0471892	1	0.205812	0.690161	1
TRINITY_DN21543_c1_g1_i1	-0.995092	-0.100856	0.838863	1.99321	1.07241	1.78864	0.00213434	0.664747	0.00542771	0.205812	1	0.198485
TRINITY_DN33255_c0_g5_i3	-0.97825	-0.352586	0.570596	1.97007	1.27685	1.48514	0.0021397	0.124767	0.0490564	0.206091	0.940978	0.554119
TRINITY_DN28614_c0_g1_i1	-1.91605	-1.78884	0.0521372	3.77389	3.45538	1.0368	0.00215227	0.0781755	0.962172	0.206492	0.823393	1
TRINITY_DN220_c0_g1_i1	-1.82793	-0.635781	1.13457	3.55027	1.55378	2.19553	0.00215451	0.149367	0.042037	0.206492	0.996445	0.521568
TRINITY_DN30799_c0_g1_i4	6.53004	7.05346	0.475215	92.4138	132.832	1.39013	0.00215469	0.00799087	0.693003	0.206492	0.333449	1
TRINITY_DN28226_c0_g1_i1	-0.999686	-1.16039	-0.223153	1.99957	2.23518	1.16728	0.00215503	0.0043344	0.590166	0.206492	0.247188	1
TRINITY_DN22572_c0_g1_i1	-1.73352	-0.966873	0.717209	3.32537	1.9546	1.644	0.00215624	0.00697434	0.177219	0.206492	0.312363	0.856283
TRINITY_DN29592_c0_g1_i2	-1.02599	-0.5613	0.410426	2.03635	1.4756	1.32908	0.00217246	0.0211512	0.193764	0.207806	0.507412	0.878918
TRINITY_DN30226_c0_g1_i1	-6.36181	1.109	7.41905	82.2425	2.15696	171.142	0.00218614	0.476627	0.000306795	0.208736	1	0.0365538
TRINITY_DN31250_c0_g1_i10	1.01634	0.591995	-0.485503	2.02278	1.50733	1.40007	0.0021876	0.0799343	0.107828	0.208736	0.829167	0.735811
TRINITY_DN31425_c0_g1_i1	4.9044	5.43417	0.481857	29.9483	43.2363	1.39654	0.00218969	3.68926e-05	0.598445	0.208736	0.0134166	1
TRINITY_DN35390_c0_g1_i1	8.05943	4.62105	-3.43675	266.767	24.6079	10.8284	0.00219736	0.255844	0.0303085	0.209228	1	0.457484
TRINITY_DN24973_c0_g1_i2	-1.71051	-0.30171	1.35054	3.27277	1.2326	2.55007	0.00221958	0.45922	0.00905369	0.210945	1	0.260759
TRINITY_DN21242_c0_g1_i1	-1.19561	-0.153614	0.987032	2.29042	1.11235	1.9821	0.00222044	0.524426	0.0060443	0.210945	1	0.210999
TRINITY_DN24875_c0_g1_i1	-1.60564	-0.734743	0.82118	3.04332	1.6641	1.76685	0.00222369	0.00944033	0.100295	0.211013	0.361507	0.723814
TRINITY_DN35225_c0_g1_i6	-7.24187	-0.415866	6.81095	151.363	1.3341	112.28	0.00223709	0.743301	0.0010372	0.211844	1	0.0763314
TRINITY_DN35707_c0_g1_i7	-7.24187	-7.2262	0	151.363	149.728	0	0.00223753	0.00185407	0	0.211844	0.161348	0
TRINITY_DN43833_c0_g1_i1	-1.47597	-0.694791	0.724594	2.78171	1.61865	1.65244	0.00224994	0.062277	0.116804	0.212777	0.759216	0.755835
TRINITY_DN25975_c0_g1_i1	-0.937807	-0.294987	0.58419	1.91561	1.22687	1.4992	0.00225281	0.291844	0.0442036	0.212806	1	0.530716
TRINITY_DN16391_c1_g1_i1	-2.21051	-0.414142	1.74217	4.62839	1.33251	3.34537	0.00225534	0.442688	0.00897179	0.212806	1	0.259774
TRINITY_DN31622_c0_g1_i12	-1.88249	-1.65884	0.167359	3.6871	3.15762	1.123	0.00226131	0.0192133	0.860004	0.213127	0.487419	1
TRINITY_DN34707_c0_g1_i1	1.09703	0.252495	-0.903091	2.13914	1.19127	1.87007	0.00226449	0.477161	0.00450304	0.213186	1	0.179887
TRINITY_DN33386_c0_g1_i6	-6.858	-6.8406	0	116.002	114.611	0	0.00227842	0.0021505	0	0.214052	0.175728	0
TRINITY_DN31190_c0_g1_i2	-6.07772	-1.88576	4.15211	67.5421	3.69548	17.7791	0.00228199	0.190129	0.186149	0.214052	1	0.867909
TRINITY_DN17842_c0_g1_i2	-3.08029	-1.00819	2.01756	8.45785	2.01139	4.04898	0.0022833	0.0219175	0.0366683	0.214052	0.514803	0.493776
TRINITY_DN34523_c0_g1_i4	1.69717	1.12736	-0.622781	3.24263	2.18459	1.53984	0.00228394	0.0441227	0.153679	0.214052	0.670808	0.81173
TRINITY_DN16377_c0_g1_i1	7.92117	8.25895	0.292894	242.387	306.332	1.2251	0.00228668	0.000590709	0.832223	0.214067	0.0828388	1
TRINITY_DN34824_c0_g1_i3	2.12247	0.496778	-1.68709	4.3544	1.41106	3.22006	0.00230225	0.585028	0.00075654	0.215284	1	0.0635479
TRINITY_DN32347_c0_g1_i6	6.55363	6.10659	-0.485101	93.9373	68.9075	1.39968	0.00233609	0.0308556	0.678148	0.218121	0.590499	1
TRINITY_DN35611_c0_g1_i1	0.882832	0.546766	-0.393525	1.84399	1.46081	1.3136	0.0023388	0.0401142	0.120111	0.218121	0.648928	0.76216
TRINITY_DN35763_c0_g3_i9	-6.60365	-2.45826	4.06549	97.2513	5.49552	16.7431	0.00234043	0.122865	0.183202	0.218121	0.940978	0.862528
TRINITY_DN29563_c0_g1_i3	-0.803086	-0.239406	0.504818	1.74483	1.18051	1.41894	0.00234956	0.328266	0.038142	0.218712	1	0.502259
TRINITY_DN34101_c0_g1_i2	-1.07085	-0.736577	0.277457	2.10067	1.66622	1.21206	0.00235202	0.0073554	0.392237	0.218712	0.321335	1
TRINITY_DN18808_c0_g1_i1	-1.40985	-0.174092	1.18103	2.6571	1.12825	2.26739	0.00235759	0.566623	0.00597967	0.218778	1	0.20966
TRINITY_DN26326_c0_g2_i1	-4.07294	-0.41868	3.59711	16.8297	1.3367	12.1014	0.0023613	0.580835	0.00144906	0.218778	1	0.0951681
TRINITY_DN35502_c0_g2_i1	1.07666	0.429639	-0.703847	2.10915	1.3469	1.62884	0.00236137	0.221826	0.0277842	0.218778	1	0.439742
TRINITY_DN34355_c0_g1_i2	-6.04344	-0.204913	5.78272	65.9562	1.15262	55.052	0.00236676	0.795788	0.00851482	0.218778	1	0.255142
TRINITY_DN33640_c1_g1_i8	-6.04344	-2.18842	3.80419	65.9562	4.55805	13.9693	0.00236787	0.0908546	0.14983	0.218778	0.85707	0.807327
TRINITY_DN28357_c0_g2_i1	-6.04344	-0.763151	5.26941	65.9562	1.69719	38.57	0.00236847	0.551379	0.0238336	0.218778	1	0.410692
TRINITY_DN33695_c0_g1_i3	8.06945	8.97713	0.856822	268.624	503.946	1.81104	0.00237359	4.539e-09	0.406096	0.219008	9.70711e-06	1
TRINITY_DN31066_c0_g1_i1	1.07343	-0.216284	-1.3488	2.10443	1.16174	2.54699	0.00241335	0.577651	6.86765e-05	0.222431	1	0.0125566
TRINITY_DN35980_c0_g2_i4	-7.29654	-2.34677	4.88739	157.209	5.08685	29.5971	0.002425	0.175142	0.0901304	0.223095	1	0.694124
TRINITY_DN35365_c0_g1_i4	9.8223	8.57062	-1.30501	905.333	380.202	2.47085	0.0024259	0.00195737	0.478025	0.223095	0.16562	1
TRINITY_DN25294_c0_g1_i5	-6.28128	-6.2636	0	77.7774	76.8303	0	0.0024395	0.00205886	0	0.224099	0.170993	0
TRINITY_DN34500_c0_g1_i1	3.52888	3.5026	-0.0906646	11.5425	11.3342	1.06486	0.0024426	0.00288428	0.892272	0.224136	0.203577	1
TRINITY_DN35463_c0_g1_i2	-2.28211	-0.483774	1.74297	4.86388	1.3984	3.34725	0.00245331	0.226892	0.0139546	0.224785	1	0.3212
TRINITY_DN32071_c0_g1_i1	-0.916741	-0.740382	0.121277	1.88785	1.67062	1.0877	0.00245506	0.0015146	0.662228	0.224785	0.144686	1
TRINITY_DN23954_c0_g1_i1	-1.55114	-0.339468	1.15733	2.93048	1.26529	2.23044	0.00246985	0.415404	0.0144781	0.225891	1	0.327574
TRINITY_DN30247_c1_g1_i1	-1.14287	-0.488766	0.600441	2.20819	1.40324	1.51618	0.00247258	0.0293538	0.0818267	0.225893	0.578861	0.670301
TRINITY_DN23835_c0_g1_i1	-1.28845	-0.650916	0.574493	2.44266	1.57016	1.48915	0.00248724	0.192164	0.235868	0.226984	1	0.913548
TRINITY_DN25191_c0_g1_i1	-2.30013	-0.750556	1.49308	4.92501	1.68244	2.8149	0.00249591	0.123404	0.0383748	0.227437	0.940978	0.502948
TRINITY_DN23126_c1_g1_i1	6.5405	7.5054	0.939962	93.0862	181.698	1.91848	0.00249766	0.00209112	0.381187	0.227437	0.172667	1
TRINITY_DN32189_c0_g1_i5	-2.7002	-1.19698	1.46938	6.49893	2.29259	2.76903	0.00253207	0.20474	0.191746	0.230319	1	0.876929
TRINITY_DN26511_c0_g1_i3	4.60067	-3.24679	-7.86014	24.2627	9.49251	232.348	0.0025548	0.416306	5.0929e-06	0.232133	1	0.0016327
TRINITY_DN33364_c0_g1_i1	-7.13341	-2.63263	4.49087	140.401	6.20154	22.4847	0.00256862	0.0948832	0.0884668	0.232793	0.872245	0.690037
TRINITY_DN30577_c0_g1_i2	6.4934	6.86674	0.346074	90.0968	116.706	1.2711	0.0025709	0.000812579	0.727672	0.232793	0.100741	1
TRINITY_DN22367_c0_g2_i2	-1.05723	-0.274834	0.719471	2.08093	1.20985	1.64658	0.00257136	0.405358	0.0470031	0.232793	1	0.542901
TRINITY_DN16147_c0_g1_i1	-1.21884	-0.80768	0.35778	2.32759	1.75039	1.28145	0.00257513	0.00617285	0.365062	0.232793	0.293274	0.998308
TRINITY_DN32213_c0_g1_i2	-2.87028	-0.179103	2.63648	7.31205	1.13218	6.21811	0.00257601	0.78202	0.0114638	0.232793	1	0.294177
TRINITY_DN35437_c1_g1_i11	7.77265	4.11092	-3.7802	218.677	17.2786	13.739	0.00260132	0.39679	0.0297266	0.234825	1	0.453162
TRINITY_DN32894_c0_g1_i2	6.54683	5.9357	-0.613918	93.4961	61.2102	1.53041	0.00260822	0.0354842	0.599836	0.235194	0.619987	1
TRINITY_DN60732_c0_g1_i1	-1.44377	-0.396128	0.992264	2.72031	1.31597	1.9893	0.00261443	0.292193	0.0279677	0.235368	1	0.440767
TRINITY_DN30897_c0_g1_i1	1.23383	0.988575	-0.2979	2.35191	1.98422	1.22935	0.0026158	0.0160017	0.380384	0.235368	0.452512	1
TRINITY_DN26030_c0_g1_i1	-0.871387	-0.219876	0.593393	1.82942	1.16463	1.50879	0.00263846	0.405297	0.0298046	0.237152	1	0.453655
TRINITY_DN24477_c0_g1_i1	-1.27691	-0.22041	1.00494	2.42319	1.16506	2.00687	0.00265075	0.516724	0.0173562	0.238	1	0.355672
TRINITY_DN29092_c0_g1_i1	-0.960347	-0.149054	0.755366	1.94578	1.10884	1.68806	0.00265836	0.564676	0.0126622	0.238413	1	0.306651
TRINITY_DN40991_c0_g1_i1	-5.99668	-0.361513	5.60071	63.8529	1.28477	48.527	0.0026612	0.730539	0.00292075	0.238413	1	0.142924
TRINITY_DN3651_c0_g2_i1	6.62537	6.66934	-0.0251636	98.7269	101.782	1.0176	0.00266393	0.0170138	1	0.238413	0.465887	1
TRINITY_DN36053_c0_g1_i1	-2.70287	2.26348	4.89509	6.51098	4.80148	29.7556	0.00267717	0.0116886	2.80307e-08	0.239342	0.39923	1.80283e-05
TRINITY_DN31344_c0_g2_i5	-1.52333	-0.308947	1.15718	2.87453	1.2388	2.23021	0.00269551	0.417314	0.0149506	0.240723	1	0.33269
TRINITY_DN32903_c1_g3_i3	3.58213	0.629454	-2.99947	11.9765	1.54698	7.99708	0.00269886	0.71519	0.00106107	0.240765	1	0.0777029
TRINITY_DN24500_c0_g1_i3	6.43624	7.57242	1.08054	86.5968	190.337	2.11483	0.00271165	0.000198094	0.199586	0.241646	0.0395005	0.883908
TRINITY_DN26799_c0_g1_i2	-6.80123	1.61941	8.3863	111.525	3.0725	334.602	0.00271718	0.306836	1.55831e-05	0.241649	1	0.00390111
TRINITY_DN34021_c0_g1_i3	1.29189	0.12571	-1.22381	2.44849	1.09104	2.33562	0.00271871	0.766712	0.00103554	0.241649	1	0.0763314
TRINITY_DN21593_c2_g1_i1	-1.23913	-0.749486	0.43714	2.36056	1.68119	1.35392	0.00272036	0.00505194	0.270502	0.241649	0.263786	0.955364
TRINITY_DN29600_c0_g1_i8	-6.0899	-6.07237	0	68.1151	67.2923	0	0.0027299	0.00233851	0	0.242238	0.182577	0
TRINITY_DN28436_c0_g1_i4	-1.25772	-0.568877	0.636707	2.39118	1.48337	1.55478	0.00273546	0.107495	0.132222	0.242473	0.909103	0.790042
TRINITY_DN28979_c0_g1_i1	-1.69429	-0.250196	1.39079	3.23617	1.18937	2.62222	0.00274899	0.43171	0.00865457	0.243414	1	0.256498
TRINITY_DN29452_c0_g1_i2	-7.21192	0.765433	7.93242	148.253	1.69988	244.285	0.00276559	0.598658	5.47219e-07	0.244624	1	0.00025269
TRINITY_DN5737_c0_g1_i1	6.44702	4.71057	-1.76152	87.2464	26.1832	3.39056	0.00278809	0.224679	0.165342	0.246353	1	0.834733
TRINITY_DN33275_c0_g1_i1	-1.84423	-1.56285	0.232142	3.59062	2.95436	1.17458	0.00279455	0.00841242	0.756609	0.246469	0.342222	1
TRINITY_DN25059_c0_g2_i1	-1.31774	-0.0411764	1.22621	2.49275	1.02895	2.33952	0.00279531	0.863843	0.0031086	0.246469	1	0.146352
TRINITY_DN33514_c0_g1_i1	-3.28569	-3.37743	-0.193672	9.75192	10.3922	1.14367	0.00281898	0.00113254	0.884363	0.247817	0.1205	1
TRINITY_DN32949_c0_g1_i1	1.61714	1.65222	-0.0177919	3.06767	3.14317	1.01241	0.00282174	0.0211486	0.981449	0.247817	0.507412	1
TRINITY_DN19449_c0_g1_i3	-6.07427	-0.239775	5.79871	67.3812	1.18081	55.6653	0.00282289	0.829396	0.00213284	0.247817	1	0.118451
TRINITY_DN32451_c0_g2_i5	-6.07428	-2.061	4.09824	67.3813	4.17275	17.1274	0.00282332	0.200609	0.234179	0.247817	1	0.911331
TRINITY_DN34830_c0_g1_i4	-1.71637	-0.938721	0.726846	3.28609	1.91683	1.65502	0.00282545	0.0366486	0.200772	0.247817	0.629231	0.886636
TRINITY_DN46339_c0_g1_i1	-0.955032	-0.963702	-0.072708	1.93862	1.95031	1.05169	0.00283914	0.00950715	0.834928	0.248755	0.362586	1
TRINITY_DN32643_c0_g1_i13	-0.923214	-0.837052	0.0183858	1.89634	1.7864	1.01283	0.0028605	0.0393012	0.961731	0.250107	0.645455	1
TRINITY_DN25077_c0_g1_i1	-7.0953	-0.392505	6.68364	136.741	1.31267	102.796	0.00286276	0.773945	0.00121285	0.250107	1	0.0851114
TRINITY_DN33036_c0_g1_i6	-7.0953	1.42558	8.48531	136.741	2.68622	358.371	0.00286356	0.392231	1.36827e-05	0.250107	1	0.00355034
TRINITY_DN28989_c0_g1_i12	-0.999635	-2.71636	-1.78925	1.99949	6.57212	3.45635	0.00287526	0.0641613	0.188266	0.250563	0.765249	0.872012
TRINITY_DN33777_c0_g1_i4	-6.19816	0.468155	6.62324	73.4228	1.38334	98.5811	0.0028762	0.71552	0.000164846	0.250563	1	0.0234313
TRINITY_DN33499_c0_g2_i13	-6.19815	-2.44362	3.71024	73.4227	5.44004	13.0887	0.00287779	0.0927593	0.311585	0.250563	0.86474	0.960714
TRINITY_DN35697_c1_g1_i1	-0.939234	-0.597214	0.280853	1.91751	1.51279	1.21491	0.00288404	0.0707272	0.409873	0.250635	0.796385	1
TRINITY_DN23524_c0_g1_i1	-1.75822	-1.41241	0.295797	3.3828	2.66181	1.22756	0.00288504	0.00708654	0.625453	0.250635	0.315899	1
TRINITY_DN32396_c0_g1_i4	-1.66366	-0.272927	1.34045	3.1682	1.20826	2.53231	0.00288763	0.397187	0.0119267	0.250635	1	0.29925
TRINITY_DN34910_c0_g1_i2	1.86851	0.283815	-1.63804	3.65156	1.21741	3.11243	0.0028976	0.722549	0.00239365	0.251239	1	0.127283
TRINITY_DN14855_c0_g1_i1	2.95008	-1.41307	-4.42784	7.72794	2.66304	21.5235	0.00290598	0.402341	5.656e-06	0.251704	1	0.0017625
TRINITY_DN33275_c1_g1_i3	-1.91257	-1.02409	0.837716	3.76479	2.03367	1.78722	0.00291553	0.0533551	0.207661	0.252269	0.718032	0.89193
TRINITY_DN28408_c0_g2_i1	6.50112	5.76263	-0.777966	90.58	54.2906	1.71471	0.0029279	0.0471381	0.529976	0.253076	0.689768	1
TRINITY_DN24850_c0_g1_i5	-5.94355	0.335757	6.23047	61.5441	1.26204	75.0861	0.00293677	0.855531	0.00310808	0.25358	1	0.146352
TRINITY_DN33386_c0_g1_i10	-6.60643	-6.59116	0	97.4394	96.4136	0	0.00295101	0.00247499	0	0.254546	0.186867	0
TRINITY_DN2307_c0_g1_i1	-1.08927	-0.861084	0.164969	2.12766	1.8164	1.12114	0.00295556	0.0438844	0.711614	0.254676	0.670246	1
TRINITY_DN35953_c0_g2_i3	1.86906	1.34346	-0.568894	3.65294	2.53758	1.48339	0.00297115	0.0819944	0.300864	0.255755	0.837108	0.960714
TRINITY_DN50927_c0_g1_i1	-1.02335	-0.192065	0.777786	2.03263	1.1424	1.7145	0.00297882	0.440486	0.0175381	0.255959	1	0.357345
TRINITY_DN6474_c0_g1_i1	1.12888	-0.490332	-1.67546	2.18689	1.40477	3.19422	0.00297966	0.25288	1.83897e-06	0.255959	1	0.000709491
TRINITY_DN33626_c0_g1_i3	-1.96653	-0.373234	1.54289	3.90827	1.29525	2.91378	0.00300259	0.316691	0.0112766	0.257402	1	0.291918
TRINITY_DN19042_c0_g2_i1	-2.31823	-1.18129	1.08361	4.9872	2.2678	2.11933	0.00300263	0.0288831	0.150126	0.257402	0.574202	0.807327
TRINITY_DN33405_c0_g1_i8	7.76143	5.42063	-2.33746	216.981	42.8325	5.05411	0.00302145	0.129648	0.142946	0.25875	0.950023	0.807327
TRINITY_DN31250_c0_g1_i2	3.16634	1.26189	-1.9639	8.97764	2.39809	3.90116	0.0030289	0.306474	0.0111071	0.259122	1	0.290289
TRINITY_DN31733_c0_g1_i5	6.68296	4.17615	-2.52448	102.747	18.0778	5.75367	0.00303548	0.219432	0.0242252	0.259265	1	0.41318
TRINITY_DN32478_c0_g1_i4	-0.723865	-1.07482	-0.406849	1.6516	2.10646	1.32579	0.00303802	3.6111e-06	0.0782816	0.259265	0.00243234	0.661593
TRINITY_DN33765_c0_g1_i5	-5.92722	-1.27121	4.6864	60.8513	2.41364	25.7481	0.00303991	0.502555	0.139396	0.259265	1	0.80391
TRINITY_DN32358_c0_g1_i6	-1.27822	-0.805493	0.414572	2.4254	1.74774	1.3329	0.00304563	0.00375273	0.273242	0.259327	0.230414	0.960234
TRINITY_DN23448_c0_g1_i2	-1.78329	-0.74866	0.982963	3.4421	1.68023	1.97652	0.00304753	0.0631027	0.0837772	0.259327	0.762385	0.674771
TRINITY_DN33656_c1_g1_i5	7.29648	5.65898	-1.70534	157.202	50.5269	3.26105	0.00305269	0.0570643	0.198222	0.259327	0.734834	0.881792
TRINITY_DN32314_c0_g1_i1	-1.26203	-0.0157077	1.18989	2.39833	1.01095	2.28135	0.00305306	0.948452	0.0025803	0.259327	1	0.133388
TRINITY_DN31812_c0_g1_i3	-1.68466	-0.224293	1.40435	3.21465	1.1682	2.64698	0.00305719	0.503649	0.00729716	0.259413	1	0.234113
TRINITY_DN33707_c0_g1_i2	2.07012	1.1761	-0.943248	4.1992	2.25965	1.92285	0.00307407	0.168106	0.0959597	0.260581	1	0.707435
TRINITY_DN24967_c0_g1_i1	0.819005	-0.152859	-1.03004	1.76419	1.11177	2.04209	0.00309487	0.51788	4.33292e-05	0.261828	1	0.00883658
TRINITY_DN24104_c0_g1_i3	2.96554	0.715057	-2.2781	7.81115	1.64155	4.85039	0.00309506	0.636965	0.0260993	0.261828	1	0.427029
TRINITY_DN35470_c0_g1_i6	-3.51324	-7.38107	-3.915	11.418	166.695	15.0846	0.0031049	1.13861e-05	0.176474	0.262394	0.00566288	0.854261
TRINITY_DN23027_c0_g1_i1	-3.03767	0.0164096	2.99113	8.21163	1.01144	7.95096	0.00312438	1	0.000541725	0.263773	1	0.0516912
TRINITY_DN32971_c0_g1_i1	-0.757072	-0.556645	0.141339	1.69006	1.47085	1.10293	0.00313334	0.0237278	0.570261	0.264262	0.531976	1
TRINITY_DN18176_c0_g2_i1	-2.67067	-0.683203	1.93639	6.36724	1.6057	3.82748	0.00314301	0.0721013	0.0219192	0.26481	0.800289	0.396807
TRINITY_DN29233_c0_g1_i3	-5.99254	0.376725	6.33903	63.6697	1.29839	80.9538	0.00316041	0.857424	0.00281754	0.26578	1	0.140754
TRINITY_DN32906_c0_g1_i2	-5.99254	-1.61622	4.33543	63.6698	3.06571	20.1881	0.0031609	0.205196	0.0739676	0.26578	1	0.646667
TRINITY_DN33255_c0_g5_i2	1.58412	0.710571	-0.925192	2.99825	1.63645	1.89894	0.00316954	0.0171527	0.0396828	0.266238	0.468041	0.508934
TRINITY_DN35750_c0_g1_i1	7.85483	7.57898	-0.331223	231.494	191.206	1.25808	0.00317976	0.00350753	0.827851	0.266828	0.224084	1
TRINITY_DN33903_c0_g1_i1	-0.768218	-1.19309	-0.483729	1.70316	2.28642	1.39835	0.00319269	4.84403e-07	0.0545165	0.267644	0.000476297	0.577857
TRINITY_DN32306_c1_g2_i3	-1.42955	-0.529182	0.845647	2.69362	1.44311	1.79707	0.0032038	0.134006	0.0642325	0.268305	0.960897	0.61488
TRINITY_DN41386_c0_g1_i1	-1.25999	-0.174205	1.03138	2.39494	1.12834	2.04398	0.00321819	0.601091	0.0124567	0.26924	1	0.304541
TRINITY_DN33551_c0_g1_i2	1.04428	0.129572	-0.971132	2.06233	1.09397	1.96038	0.00324187	0.660318	0.00203698	0.270814	1	0.115805
TRINITY_DN27995_c0_g1_i2	-4.66657	-6.52661	0	25.3968	92.1949	0	0.0032435	0.000629968	0	0.270814	0.086226	0
TRINITY_DN32271_c0_g2_i1	-6.06216	0.410385	6.43794	66.8177	1.32904	86.6987	0.00325358	0.771452	0.000350238	0.271385	1	0.0397124
TRINITY_DN28127_c0_g1_i3	-4.16361	-6.81625	-2.68792	17.9214	112.693	6.44384	0.00325716	0.000138725	0.609029	0.271411	0.0314776	1
TRINITY_DN32324_c0_g1_i1	-1.68743	-0.500205	1.1333	3.22082	1.41441	2.1936	0.00327481	0.14768	0.0344208	0.272431	0.994329	0.481805
TRINITY_DN35456_c0_g1_i2	-1.5628	-0.554217	0.95378	2.95426	1.46837	1.93694	0.00327913	0.180448	0.0563432	0.272431	1	0.585111
TRINITY_DN34558_c0_g1_i1	7.67228	7.34728	-0.32211	203.98	162.837	1.25016	0.0032812	0.0230133	0.85573	0.272431	0.523935	1
TRINITY_DN38579_c0_g1_i1	7.67228	6.25042	-1.46575	203.98	76.1314	2.76207	0.00328245	0.0185808	0.255407	0.272431	0.480205	0.946284
TRINITY_DN4223_c0_g1_i1	-7.01606	-7.00046	0	129.433	128.041	0	0.0032862	0.00279903	0	0.272471	0.200201	0
TRINITY_DN29066_c0_g1_i3	7.94399	6.71639	-1.28973	246.252	105.156	2.44482	0.00329018	0.0407475	0.437575	0.27253	0.651805	1
TRINITY_DN35790_c0_g2_i2	-3.40585	-1.14473	2.20041	10.599	2.21104	4.59609	0.00330468	0.164608	0.0476552	0.272744	1	0.546758
TRINITY_DN32189_c0_g1_i6	-2.70865	0.0251937	2.67021	6.53711	1.01762	6.36521	0.00330529	1	0.0529205	0.272744	1	0.572446
TRINITY_DN32302_c0_g1_i3	1.20125	0.0098636	-1.2531	2.29939	1.00686	2.38353	0.00330553	1	0.00416352	0.272744	1	0.170978
TRINITY_DN35658_c0_g1_i2	-1.07879	-0.565938	0.4596	2.11226	1.48035	1.37516	0.00330585	0.0146193	0.176173	0.272744	0.43727	0.853543
TRINITY_DN34932_c0_g1_i2	-1.17746	-0.788246	0.320904	2.26178	1.72697	1.24911	0.00331313	0.0544916	0.465486	0.273075	0.722388	1
TRINITY_DN34302_c0_g1_i3	-3.72118	-2.41935	1.1912	13.1882	5.34931	2.28343	0.00333126	0.0084337	0.512965	0.274298	0.34257	1
TRINITY_DN51269_c0_g1_i1	-1.52444	-1.03589	0.436706	2.87674	2.05038	1.35351	0.00333841	5.67449e-05	0.3687	0.274615	0.0176368	0.998739
TRINITY_DN14656_c0_g1_i1	7.65109	8.15448	0.472628	201.006	284.934	1.38764	0.00334829	0.000654437	0.72341	0.275157	0.087808	1
TRINITY_DN31178_c0_g1_i2	6.76225	0	-6.78087	108.553	0	109.963	0.00336003	0	0.000214071	0.275838	0	0.0282644
TRINITY_DN35715_c0_g1_i2	-1.07094	-0.55424	0.459809	2.10081	1.4684	1.37536	0.00336319	0.128249	0.182689	0.275838	0.947978	0.862528
TRINITY_DN27803_c0_g1_i1	-5.91058	0.324744	6.20797	60.1534	1.25244	73.9237	0.0033701	0.891819	0.00958487	0.276133	1	0.267697
TRINITY_DN11604_c0_g2_i1	-0.964529	-0.550609	0.35435	1.95143	1.4647	1.27841	0.0033773	0.101143	0.257761	0.276451	0.889365	0.946988
TRINITY_DN21630_c0_g3_i1	-1.63957	-0.799806	0.78764	3.11573	1.74087	1.72625	0.00338791	0.102956	0.144155	0.277048	0.896461	0.807327
TRINITY_DN25310_c0_g1_i14	1.23517	0.649304	-0.638916	2.35409	1.56841	1.55716	0.00340036	0.113986	0.10626	0.277693	0.923012	0.734056
TRINITY_DN22795_c0_g1_i1	-0.811572	-0.611035	0.144469	1.75512	1.52735	1.10532	0.00340246	0.021975	0.576584	0.277693	0.514997	1
TRINITY_DN35681_c0_g2_i1	6.33825	6.41493	0.051465	80.91	85.3271	1.03632	0.00341474	0.0138505	1	0.278275	0.4272	1
TRINITY_DN19000_c0_g1_i2	3.69727	2.40305	-1.42683	12.9715	5.28921	2.68855	0.00341626	0.20698	0.210422	0.278275	1	0.895898
TRINITY_DN48341_c0_g1_i1	3.40925	-0.883869	-4.31758	10.6239	1.84532	19.9398	0.00342259	0.718786	1.98364e-05	0.278518	1	0.0047143
TRINITY_DN32189_c0_g1_i8	2.87128	2.06708	-0.877985	7.31712	4.19036	1.83781	0.0034581	0.103931	0.311545	0.280921	0.899471	0.960714
TRINITY_DN30547_c0_g1_i2	-1.86261	-0.486677	1.31932	3.63666	1.40121	2.49549	0.00345885	0.394488	0.0284918	0.280921	1	0.444763
TRINITY_DN35656_c0_g2_i2	0.952109	0.19655	-0.819635	1.9347	1.14595	1.76496	0.00347643	0.613742	0.0147932	0.282069	1	0.331537
TRINITY_DN35503_c0_g1_i2	1.87631	-1.71216	-3.65214	3.67135	3.27652	12.572	0.00348039	0.0431221	1.74545e-08	0.282069	0.665976	1.2153e-05
TRINITY_DN33341_c0_g1_i1	-7.12208	-1.72924	5.34521	139.303	3.31552	40.6509	0.00348522	0.322374	0.0499218	0.282069	1	0.558227
TRINITY_DN26001_c0_g1_i1	-1.56445	-0.395951	1.12095	2.95764	1.31581	2.17491	0.00348972	0.156904	0.026673	0.282069	1	0.432003
TRINITY_DN20104_c0_g2_i1	-1.118	-0.363417	0.700086	2.17046	1.28647	1.6246	0.00348989	0.156103	0.0485076	0.282069	1	0.551274
TRINITY_DN647_c0_g1_i1	-4.12106	-0.439358	3.6036	17.4006	1.356	12.156	0.00350085	0.711713	0.0350499	0.282464	1	0.48507
TRINITY_DN29262_c0_g1_i2	-6.12403	0.347789	6.43748	69.7454	1.27261	86.6711	0.00350402	0.762807	0.000164443	0.282464	1	0.0234271
TRINITY_DN16873_c0_g1_i1	-6.12402	-2.65155	3.46812	69.7453	6.28341	11.0664	0.00350493	0.034934	0.296621	0.282464	0.616267	0.960714
TRINITY_DN33712_c0_g1_i2	0.719208	-0.305474	-1.08188	1.64628	1.23582	2.11679	0.00351258	0.180553	2.40346e-06	0.282498	1	0.000903804
TRINITY_DN33019_c0_g1_i4	-0.745738	-0.0107685	0.679868	1.67683	1.00749	1.60199	0.00351602	0.955644	0.00653765	0.282498	1	0.220366
TRINITY_DN19776_c0_g1_i2	-6.97475	-6.95915	0	125.78	124.426	0	0.00352013	0.0030446	0	0.282498	0.207003	0
TRINITY_DN32402_c0_g1_i1	-6.97475	-0.435698	6.47563	125.78	1.35257	88.9938	0.00352064	0.769695	0.0132305	0.282498	1	0.311856
TRINITY_DN31919_c0_g1_i3	7.61895	7.09414	-0.539993	196.577	136.631	1.45397	0.00352315	0.00828883	0.714188	0.282498	0.340262	1
TRINITY_DN17121_c0_g1_i1	-2.1838	-1.73949	0.391433	4.54348	3.33917	1.3117	0.00352737	0.0080427	0.630149	0.282498	0.334633	1
TRINITY_DN16274_c0_g1_i1	0.784998	0.363265	-0.480818	1.72309	1.28633	1.39554	0.00353091	0.163707	0.0397801	0.282498	1	0.509247
TRINITY_DN3248_c0_g1_i1	2.04071	0.164409	-1.933	4.11449	1.12071	3.8185	0.00353246	0.898783	0.00081243	0.282498	1	0.0663854
TRINITY_DN20452_c0_g1_i1	-0.815692	-0.760115	-0.00848884	1.76014	1.69363	1.0059	0.00354462	0.0278869	0.983759	0.283199	0.56836	1
TRINITY_DN35474_c0_g2_i3	2.21214	-0.733737	-2.98285	4.63362	1.66294	7.90549	0.00355885	0.451349	1.02452e-05	0.284065	1	0.00281813
TRINITY_DN18914_c0_g1_i1	-1.01826	-0.0911673	0.8717	2.02547	1.06523	1.82982	0.00357127	0.729103	0.00806351	0.284559	1	0.248062
TRINITY_DN44196_c0_g1_i1	-3.70271	-3.24676	0.344175	13.0204	9.49233	1.26942	0.00357188	0.00245083	0.904168	0.284559	0.185863	1
TRINITY_DN34132_c0_g1_i7	10.324	0	-10.3529	1281.83	0	1307.79	0.00358697	0	0.000251818	0.285489	0	0.0315647
TRINITY_DN23609_c0_g1_i1	-1.13914	-0.0907072	0.995382	2.2025	1.06489	1.99361	0.00359611	0.734584	0.00805088	0.285944	1	0.247845
TRINITY_DN50873_c0_g1_i1	0.832374	-0.49475	-1.38678	1.78061	1.40908	2.61494	0.00360097	0.1265	3.60724e-06	0.286058	0.943846	0.00123174
TRINITY_DN50370_c0_g1_i1	-1.54537	-0.522455	0.968042	2.91878	1.4364	1.95618	0.00360916	0.223614	0.0467343	0.286435	1	0.541839
TRINITY_DN35200_c0_g1_i3	1.07184	-0.158018	-1.28726	2.10211	1.11575	2.44064	0.00362407	0.66462	0.000106371	0.287095	1	0.0174264
TRINITY_DN34649_c1_g1_i1	-3.71223	-1.48631	2.16381	13.1067	2.80172	4.48098	0.00362542	0.115548	0.131929	0.287095	0.928358	0.789374
TRINITY_DN35764_c0_g1_i8	4.89245	-0.0562854	-4.99101	29.7013	1.03979	31.8012	0.0036278	1	0.000264896	0.287095	1	0.0326529
TRINITY_DN23980_c0_g1_i4	-3.06855	-1.43127	1.55555	8.3893	2.69684	2.93945	0.0036395	0.12281	0.219601	0.287748	0.940978	0.903104
TRINITY_DN35998_c1_g2_i8	2.54369	2.27466	-0.296771	5.8308	4.83883	1.22839	0.00364987	0.104954	0.761884	0.288294	0.901508	1
TRINITY_DN34938_c0_g1_i3	-1.56179	-1.0338	0.471362	2.95221	2.04741	1.38642	0.00367882	0.0361551	0.352193	0.290259	0.624692	0.985036
TRINITY_DN31491_c0_g2_i4	-4.94682	-0.961916	3.90581	30.842	1.9479	14.9887	0.0036817	0.533201	0.029107	0.290259	1	0.449657
TRINITY_DN35070_c0_g2_i1	1.77358	1.87838	0.0523933	3.41901	3.67662	1.03698	0.00369056	0.00124967	0.912452	0.290683	0.128142	1
TRINITY_DN33439_c0_g1_i1	8.23498	0	-8.25395	301.284	0	305.272	0.0036955	0	0.000272641	0.290798	0	0.033331
TRINITY_DN35248_c0_g1_i2	-7.07493	-7.05753	0	134.824	133.207	0	0.00370413	0.00303357	0	0.290949	0.206776	0
TRINITY_DN28929_c0_g1_i6	-7.07493	-1.44462	5.59354	134.824	2.72192	48.2862	0.0037044	0.325025	0.0119748	0.290949	1	0.299746
TRINITY_DN35701_c0_g1_i1	-0.747517	-0.522107	0.164493	1.6789	1.43605	1.12077	0.00372664	0.0276361	0.511418	0.29242	0.567221	1
TRINITY_DN35743_c2_g1_i5	7.57635	0	-7.60025	190.857	0	194.046	0.00373727	0	0.000279898	0.292979	0	0.0339851
TRINITY_DN35132_c1_g1_i1	2.41752	0.18959	-2.28541	5.3425	1.14044	4.87502	0.00374243	0.754404	0.000997251	0.293108	1	0.0748884
TRINITY_DN33750_c0_g1_i2	1.17342	0.675144	-0.556278	2.25546	1.59676	1.47047	0.00376257	0.112658	0.111667	0.294408	0.918793	0.741015
TRINITY_DN35329_c0_g1_i4	1.07024	0.66308	-0.454839	2.09979	1.58346	1.37063	0.00377236	0.291228	0.373716	0.294744	1	1
TRINITY_DN29560_c0_g1_i1	-1.60162	-0.100442	1.44568	3.03484	1.0721	2.72392	0.00377962	0.754814	0.00506523	0.294744	1	0.191119
TRINITY_DN32535_c0_g1_i2	-0.993755	-0.44499	0.493458	1.99136	1.3613	1.40781	0.00378089	0.0523625	0.112805	0.294744	0.712369	0.744067
TRINITY_DN55838_c0_g1_i1	-1.11157	-0.47669	0.579447	2.16081	1.39155	1.49428	0.003781	0.0451639	0.0986108	0.294744	0.675957	0.717398
TRINITY_DN16153_c0_g2_i1	-1.35231	-0.763847	0.530393	2.5532	1.69801	1.44432	0.00378567	0.0752503	0.237993	0.294833	0.811243	0.91586
TRINITY_DN22035_c0_g2_i1	-0.951957	0.0627622	0.956977	1.93449	1.04446	1.94124	0.00380567	0.825999	0.00173183	0.296115	1	0.106151
TRINITY_DN23582_c0_g1_i1	-1.3345	-0.832703	0.450159	2.52188	1.78102	1.36619	0.00381422	0.00345495	0.305274	0.296216	0.222587	0.960714
TRINITY_DN34089_c0_g1_i3	6.28668	0	-6.30621	78.0692	0	79.1333	0.00381667	0	0.00022028	0.296216	0	0.0287015
TRINITY_DN18987_c0_g1_i2	-5.98042	-1.1958	4.75792	63.1372	2.29073	27.0569	0.00381763	0.40192	0.107086	0.296216	1	0.734423
TRINITY_DN33803_c0_g1_i3	7.57727	6.72634	-0.876794	190.979	105.884	1.83629	0.00382898	0.00109514	0.429712	0.296631	0.118585	1
TRINITY_DN33045_c0_g1_i5	1.87029	-0.536474	-2.45528	3.65606	1.45042	5.48418	0.00383009	0.461037	3.74854e-05	0.296631	1	0.00793095
TRINITY_DN32387_c0_g1_i2	-3.90217	-0.507714	3.33497	14.951	1.4218	10.0908	0.00383881	0.576311	0.00908194	0.297031	1	0.261196
TRINITY_DN35501_c2_g1_i1	-1.45469	-0.73837	0.663189	2.74098	1.66829	1.58358	0.00386557	0.0763822	0.174866	0.298824	0.816959	0.850445
TRINITY_DN17471_c1_g1_i1	0.892843	-0.410276	-1.36042	1.85683	1.32894	2.56759	0.00387467	0.183084	4.01795e-06	0.29925	1	0.00133988
TRINITY_DN35432_c0_g1_i2	1.00975	-0.102902	-1.17285	2.01356	1.07393	2.25457	0.0038931	0.702518	0.000214596	0.300395	1	0.0282775
TRINITY_DN34823_c0_g1_i1	-0.911665	-0.93395	-0.0885119	1.88122	1.9105	1.06327	0.00391336	0.0160689	0.810317	0.30168	0.453855	1
TRINITY_DN2395_c0_g1_i1	-5.89347	-0.776868	5.08422	59.4445	1.71341	33.9237	0.00392752	0.558927	0.0321889	0.302492	1	0.467795
TRINITY_DN33913_c0_g1_i12	7.57798	6.21931	-1.42924	191.072	74.5071	2.69304	0.00393458	0.0663318	0.383404	0.302756	0.777619	1
TRINITY_DN20230_c0_g2_i1	-1.82416	-0.614956	1.14995	3.54101	1.53151	2.21907	0.00394186	0.226558	0.0688682	0.303036	1	0.632869
TRINITY_DN55051_c0_g1_i1	6.32653	4.70572	-1.76766	80.2557	26.0953	3.40501	0.00395836	0.269869	0.261392	0.304025	1	0.947252
TRINITY_DN12890_c0_g1_i1	-0.936646	-0.7333	0.142129	1.91407	1.66244	1.10353	0.00396278	0.0286938	0.669486	0.304084	0.573797	1
TRINITY_DN32489_c0_g1_i1	-1.01327	-0.227089	0.728221	2.01848	1.17047	1.6566	0.00398921	0.500869	0.0346248	0.305831	1	0.482947
TRINITY_DN27423_c0_g2_i2	-0.840515	-0.445813	0.330802	1.79069	1.36208	1.25771	0.00400854	0.137607	0.271694	0.306561	0.972447	0.957479
TRINITY_DN35728_c0_g1_i9	7.94102	5.60214	-2.40648	245.746	48.5751	5.30178	0.00400913	0.147125	0.186934	0.306561	0.993844	0.86945
TRINITY_DN31531_c0_g1_i4	-6.04606	0.0177494	5.99051	66.0763	1.01238	63.5803	0.00402285	1	0.0237545	0.306561	1	0.410687
TRINITY_DN14870_c0_g1_i1	-1.00885	-1.33882	-0.391687	2.0123	2.52945	1.31193	0.00402331	0.000186011	0.286178	0.306561	0.0382503	0.960714
TRINITY_DN25310_c0_g1_i16	1.05084	0.728103	-0.376633	2.07173	1.65646	1.29831	0.00402379	0.0319099	0.208265	0.306561	0.59959	0.892959
TRINITY_DN61465_c0_g1_i1	-5.85371	-0.458166	5.38065	57.8287	1.37379	41.6618	0.00402673	0.7262	0.0217475	0.306561	1	0.395628
TRINITY_DN27010_c1_g1_i3	-5.85371	-5.83701	0	57.8287	57.163	0	0.00402731	0.00262934	0	0.306561	0.192961	0
TRINITY_DN32724_c0_g1_i2	-2.56871	0.331244	2.84559	5.93277	1.2581	7.18802	0.00402995	0.662015	3.96618e-05	0.306561	1	0.00825873
TRINITY_DN61106_c0_g1_i1	-0.914988	-0.309846	0.545883	1.88555	1.23958	1.45991	0.00403181	0.293543	0.0785646	0.306561	1	0.662802
TRINITY_DN24462_c0_g1_i3	6.4198	5.80079	-0.684309	85.6153	55.7459	1.60693	0.00404141	0.0434051	0.597616	0.306882	0.668019	1
TRINITY_DN34365_c0_g1_i1	-4.08272	-2.14137	1.95036	16.9442	4.41182	3.8647	0.00404339	0.174373	0.428288	0.306882	1	1
TRINITY_DN34954_c2_g1_i6	6.30325	7.38592	1.03715	78.9711	167.256	2.05217	0.00405396	8.18323e-05	0.164662	0.307405	0.0227006	0.833008
TRINITY_DN58094_c0_g1_i1	3.96933	2.65459	-1.35726	15.6635	6.29668	2.56198	0.00405978	0.182641	0.149564	0.307566	1	0.807327
TRINITY_DN31650_c0_g1_i1	-1.03071	-0.531295	0.446314	2.04302	1.44523	1.36255	0.00407245	0.0208047	0.176806	0.308246	0.505322	0.855215
TRINITY_DN60738_c0_g1_i1	-1.02918	-0.608354	0.364157	2.04086	1.52452	1.28713	0.0040768	0.0536277	0.286731	0.308296	0.719184	0.960714
TRINITY_DN34743_c0_g1_i2	-1.68084	-0.816057	0.805704	3.20615	1.76059	1.748	0.00408615	0.0853498	0.150698	0.308722	0.844393	0.807517
TRINITY_DN21593_c2_g1_i3	-1.13635	-0.609265	0.47589	2.19824	1.52548	1.39078	0.00409299	0.0162587	0.2036	0.308959	0.455563	0.888294
TRINITY_DN21529_c0_g1_i1	1.04139	0.520272	-0.578402	2.0582	1.43423	1.49319	0.00409752	0.0399713	0.0642528	0.309022	0.648456	0.614883
TRINITY_DN26757_c0_g1_i1	-1.4714	-0.0838851	1.33774	2.77292	1.05987	2.52755	0.00411274	0.786304	0.00683435	0.309889	1	0.226224
TRINITY_DN30779_c0_g1_i4	-5.81896	-0.333056	5.47463	56.4522	1.25968	44.466	0.00412912	0.845014	0.0179209	0.310843	1	0.360845
TRINITY_DN8817_c0_g1_i1	-1.22753	-0.604184	0.569035	2.34166	1.52012	1.48353	0.00414712	0.0885041	0.161035	0.31171	0.848591	0.825284
TRINITY_DN24119_c0_g2_i2	1.38194	0.0795511	-1.36478	2.60619	1.05669	2.57536	0.00414811	0.903074	0.00122222	0.31171	1	0.0852987
TRINITY_DN31555_c0_g1_i1	0.788752	-0.131029	-0.977859	1.72758	1.09507	1.96954	0.00417659	0.599465	9.21798e-05	0.313523	1	0.0155005
TRINITY_DN35432_c0_g1_i1	-0.767416	-0.533749	0.177613	1.70222	1.44769	1.13101	0.00417975	0.0234314	0.478527	0.313523	0.528173	1
TRINITY_DN32189_c0_g1_i9	2.69926	1.97809	-0.782063	6.49469	3.93972	1.71959	0.00418827	0.0487647	0.294079	0.31367	0.695769	0.960714
TRINITY_DN35731_c7_g1_i5	-2.09031	-1.1751	0.861856	4.25839	2.25809	1.81738	0.00418976	0.236547	0.422212	0.31367	1	1
TRINITY_DN34451_c0_g1_i7	-1.09573	-0.667236	0.373946	2.13722	1.58803	1.29589	0.00419552	0.067648	0.30938	0.31367	0.780219	0.960714
TRINITY_DN20768_c0_g1_i2	-1.33797	-0.60951	0.666365	2.52796	1.52574	1.58707	0.00419676	0.240282	0.183732	0.31367	1	0.863544
TRINITY_DN34177_c0_g1_i7	-3.67642	0.141414	3.75271	12.7853	1.10299	13.4796	0.00424233	0.947104	0.000416193	0.316581	1	0.0441046
TRINITY_DN30254_c1_g1_i1	-1.60593	-0.440408	1.11725	3.04391	1.35699	2.16933	0.00424329	0.122855	0.0348841	0.316581	0.940978	0.483945
TRINITY_DN27687_c0_g2_i1	1.35236	0.696251	-0.710093	2.5533	1.62029	1.63591	0.00426931	0.0946594	0.070347	0.318109	0.871078	0.635913
TRINITY_DN26938_c0_g1_i4	4.72945	3.88504	-0.90294	26.5282	14.7746	1.86987	0.00427141	0.0701979	0.446279	0.318109	0.793773	1
TRINITY_DN29980_c0_g1_i3	0.874929	0.135732	-0.797251	1.83392	1.09865	1.73779	0.00427563	0.60451	0.00292674	0.31814	1	0.142924
TRINITY_DN32903_c1_g5_i1	6.24544	0	-6.26411	75.8689	0	76.8575	0.00428305	0	0.000263233	0.318408	0	0.0325831
TRINITY_DN22174_c0_g1_i1	-1.66482	-0.581673	1.03071	3.17073	1.49658	2.04304	0.00429657	0.362999	0.134814	0.31865	1	0.795494
TRINITY_DN34757_c0_g1_i24	7.52713	7.19975	-0.325473	184.456	147.008	1.25308	0.00429712	0.0264244	0.850958	0.31865	0.553541	1
TRINITY_DN36047_c0_g1_i1	0.807619	-0.0268923	-0.893792	1.75032	1.01882	1.85805	0.00429777	0.912889	0.000405795	0.31865	1	0.0435341
TRINITY_DN35800_c0_g1_i2	-0.672618	-0.560545	0.0521535	1.59396	1.47483	1.03681	0.00430735	0.0175987	0.819998	0.319058	0.47149	1
TRINITY_DN21911_c0_g2_i1	-1.82386	-0.341005	1.43151	3.54028	1.26664	2.69729	0.00431377	0.586478	0.0419875	0.319058	1	0.521291
TRINITY_DN33885_c0_g1_i1	-6.88829	3.03098	9.90243	118.463	8.17366	957.039	0.00431659	0.00500764	1.45713e-16	0.319058	0.263279	7.21458e-13
TRINITY_DN15817_c0_g1_i1	-1.15792	-0.874499	0.229415	2.23136	1.83337	1.17236	0.00431857	0.0152484	0.572546	0.319058	0.443618	1
TRINITY_DN28602_c0_g1_i3	-6.12184	-0.260052	5.83935	69.6398	1.19752	57.2559	0.0043249	0.888748	0.010711	0.319243	1	0.284075
TRINITY_DN33090_c0_g1_i11	-5.871	2.38726	8.21671	58.5259	5.23163	297.494	0.00433411	0.0338429	8.86274e-07	0.31964	0.610723	0.000387189
TRINITY_DN35770_c0_g1_i4	-0.778264	-1.17624	-0.455565	1.71507	2.25987	1.37132	0.00433886	3.86203e-05	0.1163	0.319707	0.0137085	0.753998
TRINITY_DN35861_c0_g1_i9	3.43053	4.29131	0.8124	10.7818	19.58	1.75613	0.004347	2.86466e-05	0.174209	0.320024	0.0111388	0.849111
TRINITY_DN22319_c1_g3_i1	-3.34044	0.0989831	3.38885	10.1291	1.07102	10.4748	0.0043509	0.936746	0.000809348	0.320029	1	0.0663439
TRINITY_DN31821_c0_g1_i3	-1.99848	-0.155809	1.78049	3.99579	1.11405	3.43543	0.0043607	0.70453	0.00608911	0.320459	1	0.212231
TRINITY_DN16241_c0_g1_i1	-1.119	-0.561312	0.506633	2.17197	1.47561	1.42073	0.00436442	0.0165328	0.163864	0.320459	0.459481	0.832002
TRINITY_DN17345_c0_g1_i1	-0.830312	-0.764068	0.0111667	1.77807	1.69827	1.00777	0.00437294	0.000870716	0.967064	0.320802	0.105204	1
TRINITY_DN33759_c1_g1_i3	-1.2483	-0.399469	0.793002	2.37561	1.31902	1.73268	0.00438283	0.224675	0.0543449	0.321245	1	0.577337
TRINITY_DN35962_c0_g1_i11	-1.8082	-2.0726	-0.310028	3.50204	4.20644	1.23973	0.00441603	0.0198634	0.755345	0.323394	0.497981	1
TRINITY_DN35217_c0_g1_i1	7.63779	8.39167	0.724698	199.161	335.848	1.65255	0.00445903	1.01474e-06	0.492996	0.326256	0.000913738	1
TRINITY_DN35287_c0_g1_i5	-2.1478	-1.24123	0.85669	4.43151	2.364	1.81088	0.00446481	0.0839096	0.296666	0.326393	0.844393	0.960714
TRINITY_DN30116_c0_g1_i1	-6.97585	-6.95835	0	125.875	124.357	0	0.00447951	0.00353808	0	0.326982	0.224526	0
TRINITY_DN35808_c0_g1_i1	1.10897	0.226151	-0.952169	2.15691	1.16971	1.93478	0.00448071	0.720872	0.0488052	0.326982	1	0.552695
TRINITY_DN20738_c0_g1_i1	-2.79608	0.165098	2.89994	6.94553	1.12124	7.46394	0.00449841	0.775905	0.000784976	0.327379	1	0.0650154
TRINITY_DN59301_c0_g1_i1	-4.52205	-3.46072	1.17355	22.976	11.0098	2.25566	0.0044988	0.0269702	0.761358	0.327379	0.559035	1
TRINITY_DN27010_c1_g1_i2	-2.72743	-1.36971	1.28443	6.62275	2.58419	2.43586	0.00450183	0.00891116	0.187102	0.327379	0.351854	0.869882
TRINITY_DN35253_c0_g1_i3	7.60587	6.13186	-1.54377	194.802	70.125	2.91556	0.00450185	0.0697855	0.343235	0.327379	0.791422	0.973948
TRINITY_DN9280_c0_g1_i1	6.59331	3.46036	-3.15553	96.5572	11.0071	8.91065	0.004511	0.537068	0.00903434	0.327759	1	0.260748
TRINITY_DN43041_c0_g1_i1	-2.26866	-0.230315	1.98645	4.81875	1.17309	3.9626	0.00452203	0.702361	0.00598007	0.328008	1	0.20966
TRINITY_DN34480_c0_g1_i1	-1.76376	3.31179	5.004	3.39581	9.92999	32.0889	0.0045223	0.00108255	1.69848e-08	0.328008	0.117877	1.19191e-05
TRINITY_DN30616_c0_g1_i4	-0.815616	-0.742725	0.0137912	1.76005	1.67333	1.00961	0.00453146	0.00938372	0.961968	0.328317	0.361507	1
TRINITY_DN33104_c0_g1_i1	-2.83988	-1.02854	1.74606	7.15962	2.03996	3.35442	0.00453443	0.0697942	0.0692565	0.328317	0.791422	0.633401
TRINITY_DN18946_c0_g1_i1	-0.78369	-0.434507	0.290581	1.72153	1.35145	1.22313	0.00454511	0.101227	0.296302	0.328805	0.889365	0.960714
TRINITY_DN35872_c0_g1_i3	-1.67003	0.351119	1.96647	3.1822	1.27555	3.90811	0.00456285	0.472146	8.04007e-05	0.329729	1	0.0140042
TRINITY_DN28871_c0_g1_i5	6.41295	7.67794	1.23991	85.2102	204.781	2.36184	0.00456579	7.04086e-05	0.144788	0.329729	0.0204194	0.807327
TRINITY_DN30684_c0_g1_i2	4.07276	3.11967	-0.990652	16.8276	8.69189	1.98708	0.00457973	0.032993	0.242568	0.33045	0.605153	0.923101
TRINITY_DN33726_c0_g1_i2	1.21962	0.468302	-0.815889	2.32885	1.38348	1.76038	0.004587	0.37747	0.0422789	0.330688	1	0.522967
TRINITY_DN39004_c0_g1_i1	-1.13573	-0.143206	0.939324	2.1973	1.10436	1.91763	0.00459194	0.622567	0.0178912	0.330759	1	0.360746
TRINITY_DN33878_c0_g1_i5	-0.980444	-1.34435	-0.42538	1.97307	2.53916	1.34293	0.00461398	0.000130751	0.184241	0.332059	0.0301483	0.864299
TRINITY_DN13433_c0_g1_i1	-1.70638	-0.300033	1.36018	3.26342	1.23117	2.56718	0.00462132	0.370469	0.0205156	0.332301	1	0.384601
TRINITY_DN35715_c0_g1_i5	-0.996099	-0.480329	0.456323	1.9946	1.39506	1.37204	0.0046402	0.177881	0.206662	0.333371	1	0.890282
TRINITY_DN23383_c0_g1_i1	0.762587	0.300433	-0.52203	1.69653	1.23151	1.43597	0.00465035	0.261289	0.0276337	0.333813	1	0.438683
TRINITY_DN45927_c0_g1_i1	-0.802808	-0.782523	-0.0440056	1.74449	1.72014	1.03097	0.00466999	0.0239163	0.891836	0.334934	0.533062	1
TRINITY_DN47474_c0_g2_i1	6.22578	4.71034	-1.60756	74.842	26.179	3.04736	0.00467449	0.151371	0.167584	0.334969	1	0.837341
TRINITY_DN35925_c0_g1_i4	7.79457	5.31895	-2.53443	222.024	39.9176	5.79348	0.00468537	0.077881	0.0888489	0.33546	0.8225	0.690952
TRINITY_DN41542_c0_g1_i1	-0.968772	-0.486311	0.428754	1.95717	1.40086	1.34607	0.00469011	0.103953	0.202362	0.335512	0.899471	0.888119
TRINITY_DN29401_c0_g2_i6	-5.80102	-0.365556	5.41254	55.7546	1.28838	42.5928	0.00470078	0.76947	0.0057028	0.335987	1	0.204021
TRINITY_DN32217_c0_g1_i5	7.40464	8.4982	1.04857	169.442	361.588	2.06848	0.00470485	5.68133e-08	0.270171	0.33599	8.40479e-05	0.954802
TRINITY_DN21985_c0_g2_i1	-1.45075	-0.493832	0.902021	2.7335	1.40818	1.86868	0.00471032	0.244878	0.056951	0.336093	1	0.587851
TRINITY_DN35825_c0_g1_i12	7.53618	7.89825	0.322832	185.617	238.567	1.25078	0.00473482	0.000997878	0.816636	0.337059	0.113514	1
TRINITY_DN19010_c0_g1_i1	2.4475	2.93108	0.418974	5.45471	7.62684	1.33698	0.00474003	6.91784e-05	0.442409	0.337059	0.0202664	1
TRINITY_DN34935_c0_g1_i2	1.2309	1.28839	-0.000981261	2.34714	2.44256	1.00068	0.00474238	0.00681098	0.998624	0.337059	0.308275	1
TRINITY_DN25310_c0_g1_i9	2.15245	0.932025	-1.27327	4.44582	1.90795	2.41709	0.00474335	0.177684	0.0371224	0.337059	1	0.496273
TRINITY_DN35687_c0_g1_i3	-6.84305	-6.8276	0	114.806	113.583	0	0.00474406	0.00395556	0	0.337059	0.236105	0
TRINITY_DN34824_c0_g1_i8	-5.90616	0.844628	6.7128	59.9698	1.7958	104.895	0.00477033	0.70902	0.0168342	0.338637	1	0.351459
TRINITY_DN30889_c0_g2_i2	-2.78489	-0.901366	1.82096	6.89184	1.86783	3.53317	0.00477762	0.262642	0.0760735	0.33872	1	0.654137
TRINITY_DN1550_c0_g2_i1	-4.73284	-6.56091	0	26.5905	94.4125	0	0.00477963	0.0010521	0	0.33872	0.116328	0
TRINITY_DN28997_c0_g2_i2	-1.83618	-0.313303	1.47267	3.57064	1.24255	2.77535	0.00478649	0.477664	0.0146647	0.338916	1	0.330006
TRINITY_DN21074_c0_g1_i1	-1.37037	-1.19985	0.119609	2.58536	2.29716	1.08644	0.00479051	0.00599279	0.817799	0.338916	0.289718	1
TRINITY_DN5947_c0_g1_i1	6.34217	0	-6.36402	81.1301	0	82.3684	0.0048427	0	0.000338052	0.342088	0	0.0389752
TRINITY_DN35743_c2_g1_i6	7.52501	6.60583	-0.938981	184.185	97.3989	1.91717	0.00484355	0.0156045	0.500649	0.342088	0.447492	1
TRINITY_DN50928_c0_g1_i1	-1.43868	-0.332003	1.04587	2.71073	1.25876	2.06461	0.00485383	0.485849	0.0128264	0.34213	1	0.308367
TRINITY_DN12140_c0_g1_i1	6.42057	0	-6.43771	85.6614	0	86.6852	0.00485596	0	0.000404881	0.34213	0	0.0435269
TRINITY_DN23197_c0_g1_i5	-5.73939	-0.836084	4.84309	53.4229	1.7852	28.7022	0.00486012	0.469998	0.038152	0.34213	1	0.502259
TRINITY_DN19508_c0_g1_i1	-5.73939	0.283218	5.99197	53.4229	1.21691	63.6447	0.00486056	0.912543	0.000905807	0.34213	1	0.0708135
TRINITY_DN21859_c0_g1_i3	0.86721	0.423406	-0.499141	1.82413	1.34109	1.41337	0.00487354	0.168423	0.0552441	0.342511	1	0.580732
TRINITY_DN27741_c0_g1_i1	3.61493	4.28805	0.632965	12.2519	19.5358	1.55075	0.00488202	0.000521009	0.360825	0.342511	0.0757259	0.995093
TRINITY_DN55670_c0_g1_i1	0.7617	0.118283	-0.6988	1.69549	1.08544	1.62315	0.00488248	0.6314	0.0042711	0.342511	1	0.173496
TRINITY_DN35980_c0_g2_i12	-6.02623	-6.00836	0	65.1742	64.372	0	0.00488445	0.00434452	0	0.342511	0.24727	0
TRINITY_DN34817_c0_g2_i2	-1.66879	-1.14689	0.467729	3.17949	2.21436	1.38293	0.0048865	0.0454023	0.449503	0.342511	0.677227	1
TRINITY_DN29099_c2_g1_i5	-2.2366	-1.19984	0.982562	4.71285	2.29714	1.97597	0.00490434	0.0335941	0.201795	0.343244	0.608785	0.888119
TRINITY_DN31418_c0_g1_i1	-0.892306	-0.34561	0.488927	1.85614	1.27069	1.4034	0.00490519	0.224211	0.111784	0.343244	1	0.741581
TRINITY_DN29415_c0_g2_i5	-5.721	-0.858007	4.77903	52.7463	1.81253	27.4557	0.00492241	0.600063	0.0912557	0.34416	1	0.69805
TRINITY_DN14237_c0_g3_i1	-6.92363	0.659865	7.5882	121.4	1.57993	192.432	0.00493001	0.824305	0.00309543	0.344403	1	0.146338
TRINITY_DN33212_c0_g1_i2	1.52302	0.802302	-0.775617	2.87392	1.74388	1.71192	0.00494576	0.286593	0.157483	0.345214	1	0.819651
TRINITY_DN32189_c0_g1_i7	-2.71795	-0.411477	2.25769	6.57938	1.33005	4.78225	0.00496442	0.720669	0.0801035	0.346227	1	0.665329
TRINITY_DN34034_c1_g1_i1	-1.32691	-0.553354	0.720599	2.50865	1.46749	1.64787	0.00497489	0.0402524	0.105446	0.346614	0.649199	0.733471
TRINITY_DN30785_c0_g1_i1	7.50232	0	-7.51827	181.311	0	183.326	0.00497828	0	0.000406413	0.346614	0	0.0435341
TRINITY_DN32409_c1_g1_i1	-0.846162	-0.129585	0.660749	1.79771	1.09398	1.5809	0.00499063	0.598599	0.0214727	0.347131	1	0.393031
TRINITY_DN36034_c2_g1_i1	0.699139	-0.0898701	-0.847335	1.62354	1.06427	1.79917	0.00499403	0.695444	0.000206179	0.347131	1	0.0273033
TRINITY_DN32819_c1_g1_i11	-3.74368	-0.895838	2.76302	13.3956	1.86069	6.78815	0.00501051	0.395026	0.0772058	0.347649	1	0.657563
TRINITY_DN26529_c0_g1_i2	-0.735655	-1.01974	-0.347543	1.66515	2.02756	1.27239	0.00501138	0.00185227	0.26327	0.347649	0.161348	0.949016
TRINITY_DN29362_c1_g1_i2	-0.802294	-0.229918	0.513646	1.74387	1.17277	1.42765	0.00501399	0.31803	0.0550531	0.347649	1	0.579889
TRINITY_DN21464_c0_g2_i1	-1.07306	-1.45402	-0.451357	2.10389	2.73971	1.36733	0.00502434	0.00398184	0.373681	0.348077	0.236471	1
TRINITY_DN27419_c0_g1_i2	6.19288	5.15828	-1.10471	73.1548	35.7105	2.15055	0.00503256	0.0850606	0.353559	0.348358	0.844393	0.986482
TRINITY_DN9362_c0_g1_i1	-2.22429	-0.0907567	2.07611	4.67281	1.06493	4.21669	0.00506295	0.878187	0.00644712	0.349937	1	0.219029
TRINITY_DN6254_c0_g1_i1	-0.81182	-0.561597	0.190715	1.75542	1.4759	1.14133	0.00506699	0.0296517	0.500011	0.349937	0.581106	1
TRINITY_DN12549_c0_g2_i1	-0.979528	-0.22288	0.696134	1.97182	1.16706	1.62016	0.00506797	0.484835	0.0335269	0.349937	1	0.475415
TRINITY_DN26959_c0_g1_i4	1.03615	0.213586	-0.881519	2.05074	1.15957	1.84231	0.00507618	0.585049	0.00510953	0.350214	1	0.191897
TRINITY_DN39902_c0_g1_i1	7.78356	3.58366	-4.20824	220.336	11.9892	18.4844	0.0050957	0.386752	0.00815314	0.35127	1	0.249271
TRINITY_DN34153_c0_g1_i2	-6.74818	0.795888	7.50717	107.499	1.73615	181.921	0.00510896	0.678977	0.00047223	0.35167	1	0.0481126
TRINITY_DN34757_c0_g1_i22	-6.74818	-6.73271	0	107.499	106.352	0	0.00510992	0.00439489	0	0.35167	0.24832	0
TRINITY_DN31635_c0_g1_i10	-6.79639	-6.78094	0	111.152	109.968	0	0.0051219	0.00434097	0	0.351892	0.247233	0
TRINITY_DN35851_c0_g1_i22	-6.79639	-0.56024	6.23656	111.152	1.47451	75.4036	0.00512214	0.718438	0.0181121	0.351892	1	0.362341
TRINITY_DN26510_c2_g1_i4	7.38791	7.49262	0.0465051	167.487	180.096	1.03276	0.00512634	0.00498464	0.986776	0.351892	0.262727	1
TRINITY_DN35503_c0_g1_i4	1.89745	-2.02542	-4.0323	3.72554	4.0711	16.3622	0.00513296	0.051462	6.54662e-08	0.351892	0.70617	3.88965e-05
TRINITY_DN27614_c0_g1_i1	-5.7577	-1.56871	4.1521	54.1053	2.96639	17.7789	0.00513424	0.279099	0.186186	0.351892	1	0.867909
TRINITY_DN50861_c0_g1_i1	-0.662753	-0.457957	0.141272	1.5831	1.3736	1.10288	0.00519332	0.1013	0.595996	0.35545	0.889365	1
TRINITY_DN22849_c0_g1_i1	-1.28721	-0.796352	0.435811	2.44056	1.7367	1.35267	0.00519469	0.266709	0.550514	0.35545	1	1
TRINITY_DN24476_c0_g1_i1	-2.35251	-1.07925	1.21882	5.10712	2.11294	2.32756	0.00522966	0.0497177	0.154729	0.35755	0.700397	0.812349
TRINITY_DN13568_c0_g1_i1	-1.5605	-0.64911	0.858057	2.94956	1.5682	1.8126	0.00526039	0.159046	0.127555	0.359356	1	0.778019
TRINITY_DN32041_c0_g1_i2	6.26489	5.16426	-1.12364	76.8988	35.859	2.17896	0.00528846	0.0888084	0.286387	0.360774	0.848591	0.960714
TRINITY_DN34527_c1_g1_i2	0.840177	0.0827718	-0.817017	1.79027	1.05905	1.76176	0.00529653	0.772532	0.00284619	0.360774	1	0.141314
TRINITY_DN33160_c0_g1_i6	-1.05127	-0.663299	0.332176	2.07236	1.5837	1.25891	0.00529762	0.0516699	0.361744	0.360774	0.708228	0.995765
TRINITY_DN2905_c0_g1_i1	-1.27781	-0.624299	0.596621	2.42471	1.54146	1.51217	0.00529843	0.0785609	0.172201	0.360774	0.824136	0.845132
TRINITY_DN35864_c0_g1_i1	1.88022	1.98009	0.0441334	3.68131	3.94517	1.03106	0.00531834	0.00284793	0.933546	0.361833	0.202139	1
TRINITY_DN32874_c0_g1_i11	-6.02926	-6.01439	0	65.3111	64.6416	0	0.00533954	0.0048347	0	0.36298	0.258829	0
TRINITY_DN8200_c0_g1_i1	-0.890614	-0.723734	0.109505	1.85396	1.65145	1.07886	0.00534415	0.0181756	0.731244	0.362997	0.475179	1
TRINITY_DN25310_c0_g1_i18	1.49991	0.233308	-1.31705	2.82825	1.17553	2.49156	0.00535686	0.606382	0.00654379	0.363459	1	0.22049
TRINITY_DN13236_c0_g1_i2	1.0883	0.691576	-0.449543	2.12623	1.61505	1.36561	0.00536173	0.0932351	0.177468	0.363459	0.867113	0.856764
TRINITY_DN33543_c0_g1_i1	1.61815	0.697237	-0.971813	3.06981	1.6214	1.9613	0.00536535	0.294128	0.0401145	0.363459	1	0.510799
TRINITY_DN25591_c0_g1_i11	-1.27471	-0.252332	0.965657	2.4195	1.19113	1.95295	0.00536837	0.394758	0.0247863	0.363459	1	0.416737
TRINITY_DN20836_c0_g2_i1	-1.35826	-0.530457	0.778424	2.56376	1.44439	1.71526	0.00537785	0.0607563	0.0937272	0.363673	0.750518	0.703986
TRINITY_DN27052_c0_g1_i1	-0.81692	-0.927337	-0.170897	1.76164	1.90176	1.12576	0.00538025	0.00232679	0.579236	0.363673	0.182274	1
TRINITY_DN23570_c0_g1_i4	-5.70222	-1.97084	3.63037	52.0643	3.91997	12.3837	0.00539016	0.175687	0.308344	0.363835	1	0.960714
TRINITY_DN34471_c0_g1_i3	-4.01592	0.00206274	3.95285	16.1775	1.00143	15.4855	0.00539138	1	0.0025687	0.363835	1	0.133097
TRINITY_DN8762_c0_g2_i1	-2.11014	0.52456	2.57654	4.31735	1.43849	5.96509	0.00540247	0.432539	3.83438e-05	0.364086	1	0.0080596
TRINITY_DN33239_c0_g1_i5	2.40699	2.313	-0.160908	5.30366	4.96915	1.11799	0.00540383	0.00411037	0.806091	0.364086	0.241495	1
TRINITY_DN35414_c2_g1_i2	0.901643	0.00711245	-0.947842	1.86819	1.00494	1.92899	0.00543776	1	0.00196053	0.366077	1	0.113547
TRINITY_DN3904_c0_g1_i1	-1.48034	-0.747421	0.680788	2.79015	1.67879	1.60301	0.0054437	0.0750115	0.208322	0.366181	0.811165	0.89307
TRINITY_DN45540_c0_g1_i1	-5.79496	-1.42179	4.33659	55.5209	2.67918	20.2043	0.00547801	0.295484	0.0854144	0.368192	1	0.680141
TRINITY_DN33182_c0_g6_i1	-2.81477	-1.35196	1.41193	7.03608	2.55258	2.66093	0.00550458	0.0977941	0.131138	0.369466	0.876986	0.786811
TRINITY_DN64670_c0_g1_i1	-0.88849	-0.714851	0.116176	1.85124	1.64131	1.08386	0.00550583	0.0155393	0.714263	0.369466	0.446821	1
TRINITY_DN33541_c0_g1_i1	-0.660894	-0.753678	-0.152953	1.58106	1.68609	1.11184	0.00551702	0.00381238	0.538843	0.36992	0.231681	1
TRINITY_DN34517_c0_g1_i1	7.50843	8.0444	0.497708	182.081	264	1.41197	0.00553616	7.37445e-05	0.670394	0.370756	0.021052	1
TRINITY_DN24836_c0_g1_i3	7.85975	7.20768	-0.694967	232.284	147.818	1.61885	0.00553933	0.00349964	0.614208	0.370756	0.223747	1
TRINITY_DN9525_c0_g2_i1	-0.959052	-0.642567	0.260829	1.94403	1.5611	1.19817	0.00554282	0.00735873	0.417902	0.370756	0.321335	1
TRINITY_DN29147_c0_g1_i1	-0.995218	-0.231375	0.710916	1.99338	1.17395	1.63684	0.00556215	0.374651	0.0382003	0.371464	1	0.502259
TRINITY_DN28382_c0_g1_i1	-1.5739	-0.954187	0.566142	2.97708	1.93749	1.48056	0.00556232	0.021992	0.267904	0.371464	0.514997	0.95071
TRINITY_DN34163_c0_g1_i5	-5.18416	-0.615085	4.48619	36.3569	1.53165	22.4119	0.00558025	0.661792	0.00838652	0.372363	1	0.253106
TRINITY_DN25421_c0_g1_i2	7.35959	4.44244	-2.97014	164.232	21.7425	7.83614	0.00559033	0.2934	0.0578016	0.372473	1	0.590803
TRINITY_DN35383_c0_g1_i3	7.40104	5.72983	-1.73533	169.019	53.0703	3.32955	0.00559084	0.130232	0.324741	0.372473	0.950604	0.963113
TRINITY_DN35873_c0_g1_i4	-1.30999	-1.10907	0.147743	2.47941	2.15706	1.10783	0.00559542	0.00639211	0.758445	0.372473	0.299128	1
TRINITY_DN33993_c0_g1_i3	-0.863406	-0.327547	0.478435	1.81933	1.25488	1.39323	0.00559975	0.253766	0.0932045	0.372473	1	0.703172
TRINITY_DN33447_c0_g1_i9	-6.69825	-1.5534	5.08126	103.842	2.93508	33.8542	0.00562053	0.359744	0.0690769	0.373557	1	0.633213
TRINITY_DN32903_c1_g3_i1	4.35771	1.29966	-3.11366	20.5022	2.46171	8.65576	0.00562675	0.779244	0.00491424	0.373626	1	0.188393
TRINITY_DN33762_c0_g1_i1	-1.28431	-0.557264	0.673859	2.43565	1.47148	1.59533	0.00563157	0.0264831	0.118535	0.373626	0.553904	0.7584
TRINITY_DN33182_c0_g5_i1	-1.93155	-1.75523	0.124633	3.81465	3.37581	1.09023	0.005635	0.0109592	0.882703	0.373626	0.392091	1
TRINITY_DN35869_c2_g1_i4	-3.56145	0.256681	3.76378	11.806	1.19473	13.5835	0.00564126	0.882876	0.0135634	0.373744	1	0.315899
TRINITY_DN28188_c0_g1_i6	-6.81305	-1.02497	5.72742	112.443	2.03491	52.9817	0.00565839	0.53466	0.0326958	0.374581	1	0.47177
TRINITY_DN35014_c0_g1_i4	6.90935	0	-6.92409	120.205	0	121.439	0.0056639	0	0.000502139	0.374648	0	0.0497793
TRINITY_DN10079_c0_g2_i1	6.12537	5.88675	-0.289693	69.8105	59.1681	1.22238	0.00566959	0.0861771	0.847794	0.374727	0.844393	1
TRINITY_DN14504_c0_g1_i1	6.20816	7.17467	0.933541	73.9339	144.474	1.90996	0.00568413	0.000149081	0.225641	0.375391	0.0328686	0.911331
TRINITY_DN20230_c0_g1_i3	-1.17877	-0.353696	0.766055	2.26383	1.27783	1.70061	0.00569716	0.334545	0.0534651	0.375634	1	0.574697
TRINITY_DN20286_c0_g1_i1	-1.20247	0.116303	1.26669	2.30134	1.08395	2.40608	0.00570079	0.707671	0.00251267	0.375634	1	0.131024
TRINITY_DN25423_c0_g1_i3	3.4327	3.75384	0.267329	10.798	13.4902	1.20358	0.00570131	0.000183849	0.794466	0.375634	0.0379885	1
TRINITY_DN33722_c0_g1_i3	7.4906	0	-7.51117	179.843	0	182.426	0.00570956	0	0.000521041	0.37588	0	0.0508611
TRINITY_DN19083_c0_g1_i1	-1.5855	-1.02217	0.510033	3.00113	2.03097	1.42408	0.00572954	0.0782998	0.388786	0.376776	0.824022	1
TRINITY_DN13460_c0_g1_i3	2.38088	1.68778	-0.706633	5.20855	3.2216	1.63199	0.0057322	0.216472	0.435832	0.376776	1	1
TRINITY_DN33486_c0_g1_i1	-1.33036	-0.655505	0.622256	2.51466	1.57517	1.53928	0.00576113	0.0154372	0.172216	0.378112	0.445184	0.845132
TRINITY_DN27661_c0_g1_i4	-5.77617	-1.26333	4.44794	54.8025	2.4005	21.8255	0.00576414	0.29136	0.0873218	0.378112	1	0.685482
TRINITY_DN35040_c0_g1_i3	-1.24389	-0.517713	0.673928	2.36836	1.43168	1.59541	0.00576904	0.208543	0.118556	0.378112	1	0.7584
TRINITY_DN31472_c0_g1_i1	0.762664	0.219491	-0.600025	1.69662	1.16432	1.51574	0.00577255	0.438657	0.01943	0.378112	1	0.374336
TRINITY_DN27200_c0_g1_i3	7.26821	7.94	0.625155	154.152	245.571	1.54238	0.00577519	2.85525e-06	0.530423	0.378112	0.00205252	1
TRINITY_DN33782_c0_g1_i2	0.81434	0.382026	-0.490266	1.75849	1.30317	1.4047	0.00578298	0.240216	0.0832185	0.378325	1	0.674771
TRINITY_DN34510_c0_g1_i24	6.29619	5.26892	-1.03193	78.5854	38.5571	2.04475	0.00579585	0.0753743	0.319144	0.37887	0.81235	0.961188
TRINITY_DN34823_c0_g4_i7	-1.01632	-1.14274	-0.1874	2.02275	2.208	1.13871	0.00581029	0.00380374	0.657369	0.379448	0.231681	1
TRINITY_DN27857_c0_g1_i4	-0.702965	-0.518304	0.126885	1.62785	1.43227	1.09193	0.00581379	0.031713	0.605744	0.379448	0.599393	1
TRINITY_DN33997_c0_g1_i1	-2.70034	-0.818215	1.80914	6.49953	1.76322	3.50434	0.00582155	0.225733	0.0671224	0.379657	1	0.627382
TRINITY_DN31622_c0_g1_i1	-1.03179	-0.651345	0.326351	2.04456	1.57063	1.25384	0.00584043	0.0226803	0.36504	0.379954	0.521269	0.998308
TRINITY_DN34388_c0_g1_i3	-1.13841	-0.632557	0.450261	2.20138	1.55031	1.36629	0.00584258	0.0149652	0.244229	0.379954	0.441443	0.926101
TRINITY_DN23367_c0_g1_i1	0.854283	0.480811	-0.431032	1.80786	1.39553	1.3482	0.00584358	0.126525	0.11687	0.379954	0.943846	0.755967
TRINITY_DN33522_c0_g1_i2	0.879246	-0.2567	-1.19624	1.83941	1.19474	2.29141	0.00584432	0.377223	5.40229e-05	0.379954	1	0.0104894
TRINITY_DN35736_c1_g2_i2	6.19545	5.08587	-1.15064	73.2853	33.9624	2.22012	0.00585765	0.0400665	0.233239	0.380524	0.648734	0.911331
TRINITY_DN1258_c0_g1_i1	-1.44375	-0.903171	0.482172	2.72027	1.87017	1.39684	0.00586319	0.0268211	0.350401	0.380587	0.55679	0.982459
TRINITY_DN52145_c0_g1_i1	-1.70139	-0.713148	0.9297	3.25214	1.63938	1.90488	0.00587039	0.210451	0.140975	0.380758	1	0.806052
TRINITY_DN26371_c0_g1_i1	-0.953704	-0.478629	0.416909	1.93684	1.39342	1.33506	0.00588657	0.150122	0.204802	0.381511	0.998205	0.888548
TRINITY_DN44359_c0_g1_i1	-4.3476	-0.740334	3.55967	20.3591	1.67056	11.7915	0.00590474	0.488144	0.016383	0.382377	1	0.346238
TRINITY_DN28246_c0_g1_i4	1.66918	0.987602	-0.746721	3.18033	1.98289	1.67797	0.00591432	0.110168	0.0665727	0.382377	0.912212	0.624728
TRINITY_DN36423_c0_g1_i1	-0.739986	0.116486	0.793803	1.67016	1.08409	1.73364	0.00591511	0.677647	0.00264764	0.382377	1	0.135455
TRINITY_DN34500_c0_g1_i3	-3.48878	0.250106	3.68569	11.2261	1.18929	12.8677	0.00592187	0.827863	0.00166709	0.382377	1	0.103591
TRINITY_DN29238_c0_g1_i1	-1.57305	-0.632175	0.892944	2.97534	1.5499	1.85696	0.00592503	0.0604406	0.108226	0.382377	0.74874	0.735811
TRINITY_DN16085_c0_g1_i1	2.0927	0.178018	-1.97426	4.26547	1.13133	3.92927	0.00593198	0.850025	0.00261811	0.382377	1	0.134407
TRINITY_DN32788_c0_g1_i9	2.17357	0.717743	-1.49879	4.51138	1.64461	2.82606	0.00593464	0.632567	0.113397	0.382377	1	0.745527
TRINITY_DN26745_c0_g2_i2	7.28567	4.32432	-2.96643	156.029	20.0332	7.81599	0.0059366	0.28913	0.0631275	0.382377	1	0.610144
TRINITY_DN30262_c0_g1_i1	-0.661624	0.123606	0.728534	1.58186	1.08945	1.65695	0.0059457	0.589796	0.00143824	0.382668	1	0.0947735
TRINITY_DN32396_c0_g1_i3	-1.44669	-0.427306	0.967494	2.72582	1.34472	1.95544	0.00596156	0.171037	0.0534961	0.383075	1	0.574697
TRINITY_DN35636_c0_g1_i5	4.39845	0	-6.71917	21.0895	0	105.359	0.00596171	0	7.26022e-05	0.383075	0	0.0130716
TRINITY_DN30530_c0_g1_i1	-1.45431	-0.668393	0.738024	2.74026	1.5893	1.66789	0.00596582	0.0291307	0.14754	0.383075	0.576725	0.807327
TRINITY_DN35178_c0_g2_i1	1.19954	0.489522	-0.767386	2.29666	1.40398	1.70218	0.00597046	0.234449	0.0287117	0.383078	1	0.446709
TRINITY_DN25143_c0_g1_i8	1.84859	2.2173	0.298811	3.60147	4.65022	1.23013	0.00598968	0.00258682	0.622028	0.383967	0.192106	1
TRINITY_DN63691_c0_g1_i1	3.62962	4.42177	0.721543	12.3773	21.4331	1.64894	0.00599352	9.86752e-09	0.381662	0.383967	1.8465e-05	1
TRINITY_DN28600_c0_g1_i4	7.26706	0	-7.28495	154.029	0	155.951	0.00600132	0	0.000533882	0.384172	0	0.0512298
TRINITY_DN20144_c0_g1_i2	-1.19096	-0.799439	0.333483	2.28305	1.74042	1.26005	0.00601343	0.140291	0.557235	0.38435	0.978311	1
TRINITY_DN29876_c0_g1_i3	-5.92422	-2.94789	3.09896	60.7249	7.7162	8.56803	0.0060172	0.0929675	0.458564	0.38435	0.865283	1
TRINITY_DN34520_c0_g1_i2	-1.0589	-0.170497	0.832297	2.08334	1.12545	1.78052	0.00601793	0.623228	0.0193312	0.38435	1	0.373636
TRINITY_DN28312_c0_g1_i9	7.33134	7.95728	0.578451	161.047	248.53	1.49324	0.00602689	0.00111929	0.670967	0.384628	0.119685	1
TRINITY_DN24431_c0_g1_i1	-1.07005	-0.478046	0.537141	2.09951	1.39286	1.45109	0.00604588	0.0933027	0.140438	0.384895	0.867144	0.805519
TRINITY_DN25522_c0_g1_i1	-1.30537	-0.592275	0.661025	2.47147	1.50762	1.58121	0.00606032	0.0478131	0.149012	0.384895	0.692454	0.807327
TRINITY_DN20158_c0_g1_i1	-5.61561	-0.0187914	5.55052	49.0307	1.01311	46.8677	0.0060609	1	0.0120757	0.384895	1	0.300925
TRINITY_DN21125_c0_g1_i1	-5.61561	0.883022	6.46732	49.0307	1.84423	88.4825	0.00606276	0.44355	0.000593468	0.384895	1	0.0546395
TRINITY_DN23769_c0_g1_i2	-5.61561	-0.810846	4.80714	49.0307	1.75424	27.9958	0.00606585	0.625546	0.0526451	0.384895	1	0.571042
TRINITY_DN27403_c0_g3_i2	-5.61561	-1.42571	4.15211	49.0307	2.68646	17.7791	0.00606668	0.365713	0.186139	0.384895	1	0.867909
TRINITY_DN43953_c0_g1_i1	-5.61561	-5.59961	0	49.0307	48.4898	0	0.00606701	0.00439334	0	0.384895	0.24832	0
TRINITY_DN32239_c0_g1_i1	-5.61561	-2.97839	2.58754	49.0307	7.88107	6.01073	0.00606799	0.0468736	0.597045	0.384895	0.688706	1
TRINITY_DN23003_c0_g1_i2	-1.09722	-0.022578	1.01689	2.13942	1.01577	2.02356	0.00607866	0.93651	0.00630346	0.384935	1	0.215736
TRINITY_DN33210_c0_g1_i9	-6.16648	0.118451	6.24701	71.8282	1.08557	75.9517	0.00608099	0.994849	0.00063211	0.384935	1	0.0567893
TRINITY_DN12580_c0_g1_i3	2.22947	-0.625569	-2.91265	4.68963	1.54282	7.53002	0.00608247	0.557225	0.01576	0.384935	1	0.340579
TRINITY_DN35957_c0_g1_i5	-5.63507	-0.396478	5.1682	49.6964	1.31629	35.957	0.00609792	0.757858	0.0382739	0.385084	1	0.502435
TRINITY_DN33267_c0_g1_i7	-5.63507	-0.885901	4.71223	49.6964	1.84792	26.2134	0.00609978	0.416094	0.0220576	0.385084	1	0.397376
TRINITY_DN30525_c0_g1_i2	-5.63507	-5.61843	0	49.6964	49.1264	0	0.00609984	0.00443836	0	0.385084	0.24832	0
TRINITY_DN31967_c0_g1_i5	-0.894059	0.220954	1.05476	1.8584	1.1655	2.07737	0.00610369	0.479095	0.000529617	0.385084	1	0.0510422
TRINITY_DN28603_c0_g1_i1	-0.925232	-0.48639	0.379504	1.89899	1.40094	1.30089	0.0061079	0.114664	0.245794	0.385084	0.925353	0.928914
TRINITY_DN42055_c0_g1_i1	6.57595	3.42412	-3.13217	95.4019	10.734	8.76755	0.00613753	0.629888	0.017056	0.38666	1	0.352847
TRINITY_DN13521_c0_g1_i1	0.859786	-0.376447	-1.2942	1.81477	1.29814	2.45241	0.00614308	0.242581	6.92383e-06	0.386717	1	0.00207766
TRINITY_DN27926_c0_g1_i1	1.66068	-0.172328	-1.88301	3.16165	1.12688	3.68843	0.00614839	0.823802	0.000319491	0.38676	1	0.0374161
TRINITY_DN13902_c0_g2_i1	-1.31937	-0.399304	0.865893	2.49557	1.31887	1.82247	0.00616433	0.255109	0.0569923	0.38747	1	0.588064
TRINITY_DN33892_c0_g2_i3	-1.63347	-0.443926	1.13592	3.10259	1.3603	2.19759	0.00618697	0.207984	0.0412248	0.3886	1	0.51698
TRINITY_DN654_c0_g1_i1	3.39106	2.73055	-0.727871	10.4909	6.63707	1.65619	0.00619313	0.0221984	0.303778	0.388694	0.517382	0.960714
TRINITY_DN35109_c0_g1_i2	-0.80307	-1.05015	-0.306515	1.74481	2.07075	1.23672	0.00620292	5.97776e-05	0.296563	0.388699	0.0182629	0.960714
TRINITY_DN34480_c0_g2_i1	-3.12536	2.93238	5.98522	8.72626	7.63368	63.3479	0.00620327	0.00316002	2.8118e-08	0.388699	0.21053	1.80283e-05
TRINITY_DN13816_c0_g1_i1	6.12793	6.99633	0.838959	69.9344	127.675	1.78876	0.00620718	0.000406129	0.282813	0.388699	0.0656746	0.960714
TRINITY_DN34630_c0_g1_i10	6.19312	4.32433	-1.85081	73.1669	20.0334	3.60703	0.00622371	0.289088	0.152354	0.389442	1	0.810314
TRINITY_DN31883_c0_g1_i1	6.70425	6.80715	0.0669338	104.275	111.984	1.04749	0.00623503	0.0071474	1	0.389858	0.317125	1
TRINITY_DN33104_c0_g1_i6	7.07164	6.91061	-0.201924	134.516	120.31	1.15023	0.00625903	0.00462077	0.897635	0.391065	0.252898	1
TRINITY_DN29592_c0_g1_i3	-0.888142	-0.952689	-0.121411	1.85079	1.93548	1.0878	0.00630226	0.00322627	0.712045	0.393187	0.213118	1
TRINITY_DN25143_c0_g1_i11	6.11749	6.60014	0.413435	69.4299	97.0152	1.33185	0.00630241	0.0117851	0.708685	0.393187	0.400058	1
TRINITY_DN31711_c0_g1_i3	-4.83906	-0.150331	4.6459	28.6221	1.10982	25.0355	0.00631295	0.858007	0.00391974	0.393494	1	0.165844
TRINITY_DN25423_c0_g1_i22	1.49809	-0.531811	-2.08304	2.82469	1.44574	4.23698	0.00631678	0.377589	4.56506e-05	0.393494	1	0.00924653
TRINITY_DN26726_c0_g1_i3	-2.86615	-2.42115	0.350599	7.29115	5.35597	1.27509	0.00632587	0.0738565	0.851023	0.393766	0.807462	1
TRINITY_DN33759_c1_g1_i4	-1.5544	-0.455878	1.04681	2.93712	1.37162	2.06595	0.00633201	0.174531	0.0542173	0.393855	1	0.577126
TRINITY_DN32220_c0_g1_i2	-0.97246	-0.359156	0.562804	1.96218	1.28268	1.47714	0.00634185	0.21788	0.11853	0.394173	1	0.7584
TRINITY_DN25057_c0_g1_i1	0.897997	-0.754302	-1.71065	1.86348	1.68682	3.27307	0.0063678	0.0237369	2.80959e-09	0.394735	0.531976	2.29722e-06
TRINITY_DN27569_c0_g1_i2	-6.64647	-1.21045	5.43324	100.181	2.3141	43.2085	0.00636807	0.47552	0.04911	0.394735	1	0.554154
TRINITY_DN19514_c0_g1_i3	-6.64647	-6.63115	0	100.181	99.1233	0	0.0063694	0.00530289	0	0.394735	0.272118	0
TRINITY_DN27519_c0_g1_i1	0.693444	-0.484298	-1.23754	1.61714	1.39891	2.35796	0.00637457	0.0454734	3.45405e-07	0.394735	0.677679	0.000169138
TRINITY_DN8086_c0_g2_i1	6.26287	3.42412	-2.81085	76.7912	10.734	7.01698	0.0063785	0.629897	0.0209114	0.394735	1	0.388425
TRINITY_DN23411_c0_g2_i1	6.26287	6.67244	0.379386	76.7912	102.001	1.30079	0.00637928	0.00100258	0.695967	0.394735	0.113746	1
TRINITY_DN35171_c1_g5_i8	-1.04988	-0.297635	0.697918	2.07035	1.22913	1.62216	0.00638955	0.290835	0.0571766	0.395063	1	0.588592
TRINITY_DN32821_c1_g2_i1	2.00888	2.59594	0.531534	4.02471	6.04585	1.44546	0.00639406	0.00260081	0.328607	0.395063	0.192513	0.966054
TRINITY_DN33354_c0_g1_i1	-6.75452	-0.0179675	6.67839	107.972	1.01253	102.423	0.00641793	0.958431	0.000256358	0.395854	1	0.0319541
TRINITY_DN33662_c0_g1_i1	-6.75452	-6.7369	0	107.972	106.662	0	0.00641907	0.00507006	0	0.395854	0.263834	0
TRINITY_DN33643_c0_g2_i21	-6.75452	-1.91364	4.77903	107.973	3.76759	27.4557	0.0064211	0.28391	0.0912568	0.395854	1	0.69805
TRINITY_DN32867_c0_g1_i2	7.4823	6.73182	-0.757776	178.812	106.287	1.69088	0.00643235	0.0408877	0.660897	0.396255	0.652367	1
TRINITY_DN35831_c0_g1_i3	2.97657	1.54467	-1.46384	7.87115	2.91737	2.75842	0.00646188	0.273603	0.0277794	0.39778	1	0.439742
TRINITY_DN32214_c0_g1_i1	7.36426	8.29289	0.902817	164.764	313.624	1.86971	0.00647198	0.000483352	0.496329	0.3979	0.0729922	1
TRINITY_DN25310_c0_g1_i11	2.18052	2.74691	0.514305	4.53317	6.71279	1.42831	0.00647337	0.000774367	0.368687	0.3979	0.0974508	0.998739
TRINITY_DN30149_c0_g1_i1	-1.34874	-2.45072	-1.16634	2.54689	5.46688	2.24442	0.00649493	1.4581e-08	0.0278878	0.398931	2.49463e-05	0.440209
TRINITY_DN26083_c0_g1_i1	-1.65274	-1.66742	-0.0645381	3.1443	3.17647	1.04575	0.0065076	0.00341184	0.947363	0.399415	0.220572	1
TRINITY_DN30073_c0_g1_i1	4.32904	2.43894	-1.93375	20.0988	5.42244	3.82048	0.00653358	0.239189	0.0400779	0.400715	1	0.510625
TRINITY_DN58902_c0_g1_i1	-1.02765	-0.359871	0.607627	2.0387	1.28331	1.52375	0.00654865	0.31522	0.0844311	0.401344	1	0.676576
TRINITY_DN28665_c0_g1_i4	6.30107	4.71057	-1.62041	78.8517	26.1832	3.07462	0.00658008	0.22468	0.226754	0.402974	1	0.911331
TRINITY_DN27775_c0_g1_i1	2.17197	0.810805	-1.41318	4.50638	1.75419	2.66323	0.0066239	0.209571	0.0373142	0.405097	1	0.497163
TRINITY_DN29785_c0_g1_i12	1.27519	-1.00738	-2.33896	2.42031	2.01026	5.05938	0.00662446	0.0881807	1.95009e-07	0.405097	0.848591	0.000102838
TRINITY_DN2287_c0_g2_i1	-0.951313	0.2045	1.09738	1.93363	1.15229	2.13966	0.00665841	0.507673	0.00062523	0.406875	1	0.0562278
TRINITY_DN35974_c0_g1_i1	0.866945	-0.0262613	-0.953236	1.8238	1.01837	1.93621	0.00667278	0.91857	0.000591491	0.407455	1	0.0546268
TRINITY_DN35367_c0_g1_i12	6.42034	0	-6.43544	85.6478	0	86.5488	0.00670243	0	0.000637296	0.408966	0	0.0570252
TRINITY_DN12654_c0_g1_i2	-5.65463	-5.63738	0	50.3747	49.7761	0	0.00672453	0.00486898	0	0.409619	0.259671	0
TRINITY_DN24091_c0_g1_i2	-5.65463	-1.35842	4.27605	50.3747	2.56404	19.374	0.00672487	0.339268	0.0957152	0.409619	1	0.70713
TRINITY_DN10058_c0_g1_i1	-0.793593	-0.658208	0.0779735	1.73339	1.57812	1.05553	0.00672787	0.0409676	0.806731	0.409619	0.652495	1
TRINITY_DN32189_c0_g1_i3	2.66657	1.79977	-0.934857	6.34917	3.48166	1.9117	0.00673637	0.113612	0.19315	0.409838	0.922147	0.878918
TRINITY_DN25310_c0_g1_i21	2.43406	2.4168	-0.0647134	5.40411	5.33986	1.04588	0.00677252	0.00807356	0.925823	0.411737	0.335102	1
TRINITY_DN28330_c0_g1_i1	-1.17274	-0.556387	0.56271	2.25439	1.47058	1.47704	0.00679315	0.0715769	0.175507	0.41269	0.799138	0.851982
TRINITY_DN30509_c0_g1_i1	-1.56932	0.38253	1.9054	2.96764	1.30363	3.74613	0.0068159	0.307582	0.000573762	0.413771	1	0.0535443
TRINITY_DN57943_c0_g1_i1	-2.45988	-0.285193	2.12245	5.50171	1.21857	4.35434	0.0068505	0.676928	0.010395	0.415569	1	0.279738
TRINITY_DN35799_c0_g1_i2	1.2326	1.13445	-0.15201	2.3499	2.19535	1.11112	0.0068609	0.0433306	0.736562	0.415897	0.667354	1
TRINITY_DN33722_c0_g1_i1	7.25029	0	-7.2719	152.249	0	154.546	0.00687232	0	0.000681639	0.41613	0	0.0595579
TRINITY_DN19292_c0_g1_i4	6.12009	3.39308	-2.72184	69.5555	10.5055	6.59714	0.00687472	0.631562	0.0258463	0.41613	1	0.425026
TRINITY_DN1424_c0_g1_i2	-2.58787	-2.72852	-0.168737	6.0121	6.62773	1.12407	0.00688986	0.0413112	0.936145	0.416744	0.655767	1
TRINITY_DN20505_c0_g1_i1	-1.13967	-0.0653519	1.02248	2.20331	1.04634	2.03141	0.00691653	0.800809	0.0106586	0.418054	1	0.283471
TRINITY_DN17438_c0_g1_i1	-1.3206	-0.638544	0.63113	2.4977	1.55676	1.54878	0.00692629	0.0099857	0.157942	0.418123	0.372208	0.819651
TRINITY_DN34823_c0_g4_i6	-0.94404	-0.844402	0.0354923	1.92391	1.79552	1.02491	0.0069277	0.0475354	0.934357	0.418123	0.691285	1
TRINITY_DN3366_c0_g2_i1	-1.71044	-0.952723	0.703188	3.27261	1.93552	1.6281	0.00694437	0.0360077	0.252195	0.418725	0.62301	0.940778
TRINITY_DN28397_c2_g1_i1	-0.778699	-0.285773	0.435362	1.71558	1.21906	1.35225	0.00695153	0.207181	0.103629	0.418725	1	0.729535
TRINITY_DN35327_c0_g2_i12	2.69	0.969322	-1.7367	6.45314	1.95792	3.33273	0.00695274	0.713679	0.161098	0.418725	1	0.825284
TRINITY_DN35851_c0_g1_i20	7.70142	5.75041	-1.96726	208.142	53.8328	3.91025	0.00695948	0.0480207	0.205987	0.418829	0.693097	0.889431
TRINITY_DN32336_c0_g1_i1	6.20037	4.71057	-1.52093	73.5357	26.1832	2.86975	0.0069853	0.224694	0.255797	0.420023	1	0.946988
TRINITY_DN37861_c0_g1_i1	-6.59284	-6.57753	0	96.5254	95.5068	0	0.0069894	0.00591077	0	0.420023	0.287581	0
TRINITY_DN28890_c0_g1_i1	6.40878	4.44243	-1.99272	84.9643	21.7423	3.97986	0.00703059	0.29345	0.132339	0.422145	1	0.790042
TRINITY_DN34866_c0_g1_i6	7.17857	0	-7.20063	144.866	0	147.097	0.00703482	0	0.000701159	0.422145	0	0.0606687
TRINITY_DN27819_c1_g1_i3	-5.78241	-1.16207	4.53547	55.0401	2.23778	23.1906	0.00705289	0.429234	0.123787	0.422925	1	0.769769
TRINITY_DN33279_c0_g1_i3	-1.22735	0.122775	1.29499	2.34137	1.08883	2.45375	0.00706143	0.755744	0.00244851	0.423133	1	0.129046
TRINITY_DN26215_c0_g2_i1	1.99327	0.5902	-1.45762	3.9814	1.50546	2.74655	0.00708136	0.371318	0.0156428	0.424023	1	0.339862
TRINITY_DN13409_c0_g1_i1	-1.36945	-0.169455	1.15045	2.58371	1.12463	2.21983	0.00709042	0.565046	0.0181721	0.424098	1	0.362961
TRINITY_DN20924_c0_g1_i1	2.65082	-0.0854865	-2.79504	6.28026	1.06105	6.94051	0.00709326	0.949265	0.00114297	0.424098	1	0.0817571
TRINITY_DN33160_c0_g1_i5	-0.774832	-0.474519	0.245474	1.71099	1.38945	1.18548	0.00709817	0.094328	0.384861	0.424098	0.869057	1
TRINITY_DN30775_c0_g1_i1	-0.979963	-0.317757	0.608794	1.97241	1.24639	1.52498	0.00710295	0.237401	0.0731443	0.424098	1	0.643989
TRINITY_DN29847_c0_g2_i11	2.96211	3.0521	-0.00953517	7.79264	8.2942	1.00663	0.00710913	0.0911016	1	0.424163	0.85847	1
TRINITY_DN35621_c0_g1_i1	1.09835	0.34288	-0.811532	2.14109	1.26829	1.75507	0.00713912	0.408524	0.0200322	0.425648	1	0.380338
TRINITY_DN22506_c0_g1_i1	-1.26658	-1.35021	-0.148674	2.4059	2.54949	1.10855	0.00721023	0.00803538	0.770748	0.42958	0.334633	1
TRINITY_DN26581_c0_g2_i5	-3.96987	-1.38685	2.54145	15.6693	2.61507	5.82173	0.00721709	0.290941	0.165971	0.429682	1	0.83615
TRINITY_DN60962_c0_g1_i1	-1.36835	-0.851662	0.461788	2.58175	1.80458	1.37725	0.00723709	0.0103773	0.344095	0.430382	0.380856	0.975173
TRINITY_DN34163_c0_g1_i4	6.28315	6.07853	-0.225658	77.8782	67.5805	1.16931	0.00723916	0.00869667	0.858942	0.430382	0.347315	1
TRINITY_DN15339_c0_g1_i1	-2.0173	-0.0369896	1.92528	4.04824	1.02597	3.79812	0.00725178	0.939871	0.00328079	0.430825	1	0.150795
TRINITY_DN29550_c0_g1_i5	-0.774176	-0.70058	0.0171744	1.71021	1.62516	1.01198	0.00728441	0.0160683	0.9531	0.432331	0.453855	1
TRINITY_DN2081_c0_g1_i1	2.9122	3.32487	0.360309	7.52768	10.0204	1.2837	0.00728936	0.00373491	0.530097	0.432331	0.230187	1
TRINITY_DN31985_c0_g1_i6	7.16448	6.49688	-0.708201	143.457	90.3139	1.63377	0.00729268	0.00181259	0.516764	0.432331	0.159523	1
TRINITY_DN55814_c0_g2_i1	-1.11938	0.119839	1.18516	2.17254	1.08661	2.27389	0.00730395	0.641311	0.00258897	0.432691	1	0.133604
TRINITY_DN18732_c0_g1_i1	-0.714912	-0.383525	0.269713	1.64138	1.30453	1.20557	0.00731981	0.162776	0.316101	0.433117	1	0.961188
TRINITY_DN16238_c0_g1_i3	-1.41044	-0.0454483	1.31177	2.65819	1.032	2.48246	0.00732152	0.888993	0.00463059	0.433117	1	0.182433
TRINITY_DN27276_c0_g1_i1	-0.987248	-0.497229	0.435765	1.9824	1.4115	1.35263	0.00735333	0.0329732	0.199606	0.434584	0.605153	0.883908
TRINITY_DN7343_c0_g2_i1	6.00891	0	-6.02871	64.3963	0	65.2863	0.00735944	0	0.000567645	0.434584	0	0.0530847
TRINITY_DN33255_c0_g5_i5	-1.24918	-0.890804	0.305737	2.37706	1.85421	1.23605	0.00736195	0.00710205	0.499373	0.434584	0.316175	1
TRINITY_DN29563_c0_g1_i2	-0.639243	-0.35842	0.223396	1.55751	1.28202	1.16748	0.00737297	0.111765	0.322714	0.434927	0.916307	0.961188
TRINITY_DN33349_c0_g1_i1	-0.6436	-0.415234	0.169582	1.56222	1.33351	1.12473	0.00737874	0.0673602	0.463253	0.43496	0.779083	1
TRINITY_DN16566_c0_g1_i2	-2.96234	-2.57442	0.288591	7.79388	5.95632	1.22145	0.00741216	0.0126471	0.924669	0.436621	0.412617	1
TRINITY_DN28996_c0_g1_i2	-0.801317	-1.086	-0.350465	1.74269	2.12284	1.27497	0.00744179	0.0132195	0.399848	0.437785	0.421016	1
TRINITY_DN27063_c0_g1_i4	3.48196	2.6495	-0.85494	11.1732	6.27448	1.80868	0.00744241	0.0755762	0.280918	0.437785	0.813015	0.960714
TRINITY_DN26851_c0_g1_i4	-0.777992	-0.0316355	0.689855	1.71474	1.02217	1.61312	0.00747177	0.894509	0.0114113	0.439202	1	0.293666
TRINITY_DN35699_c0_g1_i2	0.99093	0.56824	-0.478168	1.98747	1.48271	1.39297	0.00748216	0.141804	0.12678	0.439503	0.981783	0.77558
TRINITY_DN55724_c0_g1_i1	-1.38156	-0.284341	1.0464	2.6055	1.21785	2.06537	0.00749392	0.36409	0.0356411	0.439579	1	0.487403
TRINITY_DN40927_c0_g1_i1	0.689039	-0.489961	-1.23813	1.61221	1.40441	2.35892	0.00749477	0.0472135	3.2783e-07	0.439579	0.690204	0.000161419
TRINITY_DN25672_c0_g1_i1	1.25833	1.36523	0.0408498	2.39219	2.57618	1.02872	0.00749926	0.0256857	0.930474	0.439579	0.54704	1
TRINITY_DN35149_c0_g1_i17	7.23623	5.63376	-1.61077	150.772	49.6514	3.05414	0.00751967	0.111154	0.32826	0.440276	0.914879	0.965679
TRINITY_DN21463_c0_g2_i1	-6.53719	-6.52186	0	92.8731	91.8918	0	0.00753361	0.00655245	0	0.440276	0.300549	0
TRINITY_DN17114_c0_g1_i2	-6.53719	1.37449	7.87701	92.8731	2.59276	235.081	0.00753449	0.273009	1.8184e-07	0.440276	1	9.82177e-05
TRINITY_DN29993_c0_g1_i3	-6.53719	-4.70104	0	92.8731	26.0109	0	0.00753497	0.018397	0	0.440276	0.477763	0
TRINITY_DN22921_c1_g4_i1	-0.69441	-0.0910272	0.541247	1.61822	1.06513	1.45523	0.00754404	0.715327	0.032915	0.440276	1	0.472224
TRINITY_DN25092_c1_g1_i1	-1.22522	-0.0744637	1.09663	2.33791	1.05297	2.13854	0.00754484	0.781099	0.00903226	0.440276	1	0.260748
TRINITY_DN30368_c0_g2_i2	-0.726394	-0.220971	0.445123	1.6545	1.16552	1.36143	0.0075481	0.35204	0.0809896	0.440276	1	0.667772
TRINITY_DN33496_c0_g1_i2	-1.14063	-0.711149	0.373597	2.20477	1.63711	1.29558	0.00756604	0.068459	0.365332	0.441014	0.784083	0.998308
TRINITY_DN31563_c0_g1_i1	0.925125	0.380784	-0.606985	1.89885	1.30205	1.52307	0.00760564	0.301237	0.0665667	0.442773	1	0.624728
TRINITY_DN16510_c1_g4_i1	-6.69345	0.160565	6.84086	103.497	1.11772	114.631	0.00761176	1	0.0018609	0.442773	1	0.110491
TRINITY_DN33981_c0_g1_i4	-6.69345	-0.0161202	6.65788	103.497	1.01124	100.977	0.00761214	0.942019	0.00141196	0.442773	1	0.0938522
TRINITY_DN25030_c0_g1_i1	6.31855	6.67918	0.297427	79.8131	102.479	1.22895	0.00762869	0.0139859	0.815343	0.443426	0.428215	1
TRINITY_DN17659_c0_g1_i1	-1.27564	-0.301208	0.92132	2.42106	1.23218	1.89385	0.00764015	0.404779	0.0431357	0.443783	1	0.525882
TRINITY_DN13758_c0_g1_i1	-5.69497	-3.06408	2.58729	51.8033	8.36336	6.00967	0.00769432	0.0625556	0.597542	0.446253	0.760906	1
TRINITY_DN4419_c0_g1_i1	-5.69497	-1.2203	4.39495	51.8033	2.32995	21.0384	0.00769616	0.41575	0.150508	0.446253	1	0.807327
TRINITY_DN25334_c0_g1_i2	6.27844	0	-6.297	77.6247	0	78.6295	0.00770288	0	0.000749603	0.446253	0	0.0632035
TRINITY_DN29578_c0_g1_i1	-0.858608	-0.358614	0.445906	1.81329	1.28219	1.36217	0.0077072	0.271025	0.185635	0.446253	1	0.867575
TRINITY_DN33419_c0_g1_i1	-2.28301	-0.0500505	2.17945	4.86692	1.0353	4.52982	0.00770941	0.962664	0.00351417	0.446253	1	0.156595
TRINITY_DN34908_c0_g1_i2	1.61483	-1.74938	-3.44905	3.06275	3.36214	10.9211	0.00776621	0.206526	0.00928386	0.449229	1	0.263453
TRINITY_DN35084_c0_g1_i5	0.778096	-0.0147964	-0.853516	1.71487	1.01031	1.8069	0.00779083	0.952844	0.00186046	0.450175	1	0.110491
TRINITY_DN35952_c0_g1_i1	-1.70565	-0.618853	1.03391	3.26176	1.53565	2.04757	0.00779545	0.292624	0.0868428	0.450175	1	0.685
TRINITY_DN35132_c1_g1_i9	1.18521	0.0544388	-1.18482	2.27397	1.03846	2.27335	0.00779877	0.905091	0.00349079	0.450175	1	0.1558
TRINITY_DN35532_c0_g1_i5	7.12979	3.67605	-3.4874	140.049	12.7821	11.2153	0.00784154	0.498636	0.0284225	0.452331	1	0.444476
TRINITY_DN32986_c0_g1_i9	-5.67455	0.456788	6.07592	51.0752	1.37248	67.4581	0.00785187	0.8206	0.00709494	0.452614	1	0.230772
TRINITY_DN21838_c1_g1_i1	-0.772449	-0.0688862	0.64698	1.70817	1.04891	1.56589	0.00792183	0.762942	0.014945	0.45574	1	0.33269
TRINITY_DN33202_c0_g1_i2	-0.965334	-1.04811	-0.142834	1.95252	2.06782	1.10407	0.00792887	0.00753858	0.720388	0.45574	0.324779	1
TRINITY_DN35005_c0_g1_i1	-0.804316	-0.766931	-0.0216759	1.74632	1.70165	1.01514	0.00793013	0.00958914	0.943549	0.45574	0.364717	1
TRINITY_DN25516_c0_g1_i1	6.13071	4.34288	-1.81252	70.0693	20.2925	3.51255	0.00793257	0.176192	0.0753154	0.45574	1	0.651667
TRINITY_DN34826_c1_g2_i2	1.85122	1.38212	-0.522462	3.60805	2.60651	1.4364	0.00793343	0.0452645	0.322093	0.45574	0.676387	0.961188
TRINITY_DN26816_c0_g1_i1	-5.57511	0.691434	6.22431	47.6733	1.61489	74.7662	0.00794605	0.605313	0.000722921	0.455969	1	0.0618907
TRINITY_DN32961_c0_g1_i6	-5.57511	0.168502	5.66839	47.6733	1.12389	50.8574	0.00794833	1	0.0359387	0.455969	1	0.48907
TRINITY_DN26271_c0_g2_i4	3.00283	2.10502	-0.977794	8.01572	4.30205	1.96945	0.00799841	0.12245	0.196298	0.458473	0.940978	0.881173
TRINITY_DN12643_c0_g2_i1	-0.675867	-0.586011	0.0320463	1.59756	1.50109	1.02246	0.00800298	0.0176253	0.89776	0.458473	0.472023	1
TRINITY_DN24446_c0_g1_i3	1.00044	0.438828	-0.619267	2.00061	1.3555	1.53609	0.00802774	0.250211	0.0638071	0.459576	1	0.613509
TRINITY_DN60705_c0_g1_i1	-0.648523	-0.308251	0.281427	1.56756	1.23821	1.2154	0.00806777	0.174197	0.230057	0.46124	1	0.911331
TRINITY_DN29774_c0_g1_i1	-2.66641	-0.727641	1.87407	6.34846	1.65593	3.66565	0.00806786	0.285443	0.0612519	0.46124	1	0.602194
TRINITY_DN30029_c0_g1_i3	3.13839	3.87674	0.676269	8.80543	14.6898	1.598	0.00807502	8.48406e-05	0.367178	0.461332	0.0232229	0.998308
TRINITY_DN27477_c0_g2_i2	-1.36649	-0.326073	0.984633	2.57843	1.2536	1.97881	0.0081258	0.443391	0.0399485	0.463324	1	0.510071
TRINITY_DN32232_c0_g1_i3	2.93401	2.35107	-0.622728	7.6423	5.10204	1.53978	0.00813111	0.162395	0.504878	0.463324	1	1
TRINITY_DN25423_c0_g1_i15	1.21683	-0.189904	-1.46061	2.32436	1.14069	2.75225	0.0081312	0.645975	0.000847932	0.463324	1	0.067897
TRINITY_DN25186_c0_g1_i1	-2.9509	-0.214513	2.67123	7.73232	1.16031	6.36973	0.00813415	0.785306	0.0134339	0.463324	1	0.314322
TRINITY_DN33528_c0_g1_i2	-6.6296	-0.397765	6.17107	99.0167	1.31747	72.057	0.00814762	0.767414	0.0190995	0.463324	1	0.371919
TRINITY_DN34735_c0_g1_i3	-6.6296	-6.61199	0	99.0167	97.8155	0	0.00814764	0.00674534	0	0.463324	0.306146	0
TRINITY_DN32583_c0_g1_i2	-6.6296	-1.78904	4.77904	99.0167	3.45584	27.4558	0.00814877	0.330798	0.0912434	0.463324	1	0.69805
TRINITY_DN25044_c0_g1_i1	-0.907699	-0.399141	0.449519	1.87605	1.31872	1.36559	0.00817187	0.191124	0.174692	0.464322	1	0.849976
TRINITY_DN33011_c0_g1_i1	6.00879	5.90384	-0.121264	64.3912	59.8733	1.08769	0.00819449	0.0434424	1	0.46529	0.668147	1
TRINITY_DN32145_c2_g5_i10	-2.63679	-1.10256	1.46224	6.21947	2.14735	2.75537	0.00821473	0.316809	0.11916	0.466122	1	0.760075
TRINITY_DN29552_c0_g1_i2	-0.703507	-0.801971	-0.158444	1.62846	1.74348	1.11608	0.00822627	0.00280869	0.559048	0.466258	0.200377	1
TRINITY_DN23685_c0_g1_i3	1.32182	0.22675	-1.15027	2.49981	1.1702	2.21955	0.00823166	0.71656	0.00521842	0.466258	1	0.194233
TRINITY_DN32838_c0_g1_i1	-1.36343	-0.285366	1.02238	2.57296	1.21872	2.03127	0.00823391	0.336344	0.0331864	0.466258	1	0.473439
TRINITY_DN26726_c0_g1_i2	-1.32597	-0.653819	0.619778	2.50701	1.57333	1.53664	0.00825622	0.0056346	0.172737	0.467204	0.281496	0.845971
TRINITY_DN25467_c0_g1_i1	0.939536	0.711057	-0.280583	1.91791	1.637	1.21469	0.00827062	0.0677098	0.416625	0.467253	0.78072	1
TRINITY_DN44680_c0_g1_i1	-6.47927	-6.46396	0	89.2183	88.2766	0	0.00827076	0.00729299	0	0.467253	0.320138	0
TRINITY_DN35974_c0_g1_i4	0.699334	0.114706	-0.643454	1.62375	1.08275	1.56206	0.00827388	0.664325	0.00737338	0.467253	1	0.235803
TRINITY_DN27801_c0_g1_i1	-3.29505	-1.12357	2.12732	9.81545	2.17886	4.36905	0.00830572	0.342585	0.190809	0.468734	1	0.876548
TRINITY_DN31640_c0_g2_i1	0.930738	0.0801746	-0.9043	1.90625	1.05715	1.87164	0.00834006	0.824098	0.00410795	0.469714	1	0.169652
TRINITY_DN30019_c0_g1_i3	-5.50158	0.396863	5.89032	45.3045	1.31664	59.3147	0.00834209	0.934891	0.0281763	0.469714	1	0.442343
TRINITY_DN33316_c0_g2_i3	-5.50158	0.0903944	5.54039	45.3045	1.06466	46.5396	0.00834457	1	0.0123369	0.469714	1	0.302972
TRINITY_DN35377_c0_g1_i7	6.02283	7.62582	1.57039	65.0209	197.515	2.96985	0.00835036	9.19634e-05	0.0625031	0.469714	0.0246612	0.607924
TRINITY_DN34956_c0_g1_i1	-1.29857	-0.693439	0.55191	2.45985	1.61713	1.46603	0.00835537	0.0189719	0.238496	0.469714	0.484057	0.91679
TRINITY_DN32742_c0_g1_i2	-3.51957	0.7435	4.20466	11.4683	1.67423	18.4387	0.00835688	0.382219	0.000140991	0.469714	1	0.021167
TRINITY_DN35983_c1_g2_i2	0.75611	-0.520394	-1.33623	1.68893	1.43435	2.52491	0.00837402	0.107795	1.41718e-05	0.470361	0.910149	0.00365034
TRINITY_DN34056_c2_g1_i1	-1.7086	-0.627583	1.03284	3.26844	1.54497	2.04605	0.0083996	0.103696	0.106333	0.471388	0.898939	0.734057
TRINITY_DN8069_c0_g2_i1	2.80802	1.35585	-1.48605	7.00322	2.55949	2.8012	0.00840362	0.563684	0.234913	0.471388	1	0.912797
TRINITY_DN21097_c0_g1_i1	-3.75345	-1.9304	1.82721	13.4865	3.81162	3.54851	0.00844663	0.139556	0.327733	0.473369	0.976792	0.96537
TRINITY_DN29194_c1_g1_i1	-1.07014	0.054723	1.07073	2.09963	1.03866	2.1005	0.00845029	0.84237	0.00464492	0.473369	1	0.182433
TRINITY_DN29781_c0_g2_i1	6.10115	4.7916	-1.35782	68.6484	27.6959	2.56298	0.00855172	0.0696815	0.211993	0.478405	0.791397	0.896887
TRINITY_DN23135_c0_g1_i4	6.16957	6.11976	-0.0868091	71.9823	69.5395	1.06202	0.00855627	0.00707276	1	0.478405	0.315449	1
TRINITY_DN8815_c0_g2_i1	-0.780825	-0.795905	-0.0715871	1.71811	1.73617	1.05087	0.00855738	0.00541014	0.806882	0.478405	0.274749	1
TRINITY_DN19749_c0_g1_i4	-5.48051	-5.46502	0	44.6477	44.1708	0	0.00861252	0.00863189	0	0.481165	0.345776	0
TRINITY_DN34121_c0_g1_i2	7.22524	8.27846	1.00694	149.628	310.503	2.00965	0.00867276	2.59972e-06	0.352918	0.484176	0.00191716	0.9858
TRINITY_DN31786_c0_g1_i3	-0.891595	-0.844264	-0.0104819	1.85523	1.79535	1.00729	0.00867999	0.0157715	0.975674	0.484176	0.449374	1
TRINITY_DN34823_c0_g9_i2	-1.12966	-1.08984	-0.0200947	2.18808	2.12851	1.01403	0.00868862	0.0166431	0.97931	0.484176	0.460451	1
TRINITY_DN28632_c0_g2_i1	5.97006	6.20473	0.186225	62.6856	73.7579	1.13778	0.00868964	0.00483807	0.887421	0.484176	0.258829	1
TRINITY_DN18717_c0_g1_i1	-0.762947	-0.296854	0.410707	1.69695	1.22846	1.32934	0.00874264	0.284945	0.135552	0.486747	1	0.797458
TRINITY_DN51703_c0_g1_i1	1.07707	-0.232699	-1.36293	2.10974	1.17503	2.57206	0.00874745	0.609421	0.000186422	0.486747	1	0.0254042
TRINITY_DN55681_c0_g1_i1	-1.48649	-0.113664	1.32491	2.80207	1.08197	2.50518	0.00880348	0.726359	0.0154974	0.489538	1	0.338377
TRINITY_DN47307_c0_g1_i1	-1.17415	-0.625485	0.491409	2.25659	1.54273	1.40582	0.00882329	0.105444	0.252651	0.489636	0.903186	0.941311
TRINITY_DN11584_c0_g2_i1	-1.57852	-1.33637	0.191211	2.98664	2.52516	1.14172	0.00882335	0.0161288	0.753084	0.489636	0.453855	1
TRINITY_DN33926_c0_g1_i1	7.2976	5.59096	-1.76491	157.324	48.2	3.39853	0.00882403	0.1106	0.27671	0.489636	0.913856	0.960714
TRINITY_DN23434_c0_g1_i2	-1.41739	-0.177543	1.18379	2.67102	1.13096	2.27173	0.00882872	0.622944	0.0169686	0.489636	1	0.351937
TRINITY_DN60917_c0_g1_i1	-1.46338	-0.714293	0.690508	2.75754	1.64068	1.61385	0.00884384	0.168408	0.211069	0.489763	1	0.895898
TRINITY_DN39575_c0_g1_i1	-5.52254	-5.50552	0	45.9674	45.4282	0	0.00884714	0.00644915	0	0.489763	0.299341	0
TRINITY_DN32886_c0_g1_i1	2.6017	1.79678	-0.860207	6.07	3.47444	1.8153	0.00885194	0.083551	0.241733	0.489763	0.844142	0.922272
TRINITY_DN31033_c0_g1_i2	-5.52254	-1.0645	4.42805	45.9674	2.09144	21.5266	0.0088545	0.461169	0.0660747	0.489763	1	0.622336
TRINITY_DN26251_c0_g1_i1	-0.738079	0.0737492	0.757276	1.66795	1.05245	1.6903	0.00886765	0.784371	0.00524135	0.490165	1	0.194262
TRINITY_DN34757_c0_g1_i9	-6.56284	-6.54522	0	94.5391	93.3918	0	0.00889085	0.00746839	0	0.490892	0.323119	0
TRINITY_DN9597_c0_g1_i1	-6.56284	-6.54522	0	94.5391	93.3918	0	0.00889257	0.00746891	0	0.490892	0.323119	0
TRINITY_DN35327_c0_g3_i5	6.09569	3.21423	-2.9285	68.389	9.28068	7.6132	0.00890592	0.513275	0.0185548	0.491304	1	0.367312
TRINITY_DN9141_c0_g2_i1	0.70832	-0.0753022	-0.844746	1.6339	1.05358	1.79595	0.0089463	0.773611	0.0014388	0.493205	1	0.0947735
TRINITY_DN3558_c0_g1_i1	4.50735	-0.231908	-4.83987	22.743	1.17439	28.6383	0.0089805	1	0.00218921	0.494764	1	0.12022
TRINITY_DN22083_c0_g1_i2	-4.20038	-2.31131	1.83697	18.3841	4.96333	3.57258	0.00898897	0.0666652	0.514829	0.494904	0.778859	1
TRINITY_DN24857_c0_g1_i2	-3.10707	-0.522718	2.51419	8.61632	1.43666	5.71276	0.00907621	0.558142	0.0310913	0.498979	1	0.460944
TRINITY_DN32607_c0_g1_i1	0.966117	0.451677	-0.573595	1.95358	1.36763	1.48823	0.00907972	0.190547	0.0654497	0.498979	1	0.619544
TRINITY_DN32313_c1_g1_i7	-1.39534	-0.584285	0.757822	2.63051	1.4993	1.69094	0.00908093	0.336527	0.220128	0.498979	1	0.903727
TRINITY_DN22773_c0_g1_i1	-1.01018	-0.439317	0.516564	2.01416	1.35596	1.43054	0.00910357	0.164056	0.164464	0.499539	1	0.832737
TRINITY_DN38995_c0_g1_i1	-5.76284	-1.6114	4.06545	54.2983	3.05549	16.7426	0.00910404	0.303922	0.183311	0.499539	1	0.862528
TRINITY_DN34741_c1_g1_i2	0.832077	0.455982	-0.436436	1.78025	1.37172	1.35326	0.0091091	0.114878	0.113008	0.499539	0.925879	0.744204
TRINITY_DN34460_c0_g1_i13	1.49616	1.15627	-0.406926	2.82092	2.2288	1.32586	0.00911727	0.114494	0.47189	0.499659	0.925121	1
TRINITY_DN31323_c0_g1_i7	-1.03713	-0.331182	0.647454	2.05214	1.25804	1.5664	0.00925062	0.33508	0.100544	0.506634	1	0.723875
TRINITY_DN21474_c0_g2_i1	-5.83392	0.26922	6.07043	57.0408	1.20516	67.2019	0.0092645	0.918199	0.00444798	0.506867	1	0.178564
TRINITY_DN35507_c0_g1_i2	3.32672	1.66869	-1.6757	10.0332	3.17925	3.19475	0.00926704	0.397612	0.0959235	0.506867	1	0.707435
TRINITY_DN18934_c0_g2_i1	3.02309	1.82452	-1.22325	8.12909	3.54188	2.33472	0.00927862	0.309404	0.18071	0.507168	1	0.862161
TRINITY_DN34870_c0_g1_i4	2.91775	2.77055	-0.207259	7.55666	6.82367	1.15449	0.00930416	0.00965009	0.708688	0.508231	0.365756	1
TRINITY_DN31250_c0_g1_i1	-1.59085	-0.572132	0.958785	3.01227	1.48672	1.94367	0.00931859	0.279053	0.0935922	0.508558	1	0.703986
TRINITY_DN33386_c0_g1_i4	0.9229	0.135922	-0.841751	1.89592	1.0988	1.79222	0.00932234	0.776869	0.0330106	0.508558	1	0.472563
TRINITY_DN21071_c0_g2_i1	-0.876075	-0.749837	0.0609703	1.83538	1.6816	1.04317	0.00934445	0.0567766	0.878162	0.509431	0.733338	1
TRINITY_DN6516_c0_g1_i1	-0.9212	-0.623351	0.235585	1.89369	1.54045	1.17738	0.00936851	0.115247	0.538698	0.510409	0.927528	1
TRINITY_DN29933_c1_g1_i3	-1.84637	-1.3027	0.4652	3.59594	2.4669	1.38051	0.00940182	0.183934	0.662288	0.51189	1	1
TRINITY_DN26730_c2_g1_i2	1.02826	-0.0866873	-1.17865	2.03956	1.06193	2.26365	0.00941561	0.848329	0.00185498	0.512187	1	0.11036
TRINITY_DN34007_c0_g1_i2	-0.837605	-0.289843	0.490692	1.78708	1.22251	1.40512	0.00941957	0.316991	0.113941	0.512187	1	0.747217
TRINITY_DN36040_c0_g1_i6	0.879825	0.428438	-0.508202	1.84015	1.34578	1.42228	0.0094652	0.207766	0.0611388	0.514174	1	0.60168
TRINITY_DN27764_c1_g3_i1	-2.70962	2.47737	5.11936	6.54151	5.56881	34.7602	0.00946843	0.118328	0.000528736	0.514174	0.936636	0.0510422
TRINITY_DN32220_c0_g1_i1	1.35292	-0.489805	-1.89658	2.55428	1.40426	3.7233	0.00948101	0.186255	5.38736e-05	0.514522	1	0.0104894
TRINITY_DN33583_c0_g2_i4	-0.704292	0.00822653	0.658472	1.62934	1.00572	1.57841	0.00950922	0.982766	0.0123142	0.515465	1	0.302917
TRINITY_DN35338_c0_g1_i3	2.11843	0.325762	-1.83616	4.34221	1.25333	3.57058	0.00951074	0.746151	0.0122419	0.515465	1	0.30264
TRINITY_DN21999_c0_g1_i2	-2.71113	5.09324	7.74102	6.54833	34.1364	213.933	0.00952529	0.000711697	2.1451e-17	0.515833	0.0926294	1.12456e-13
TRINITY_DN31371_c0_g1_i1	-1.39445	-0.490539	0.84321	2.62888	1.40497	1.79404	0.00954241	0.336648	0.0956959	0.515833	1	0.70713
TRINITY_DN34028_c0_g1_i1	-6.41878	0.0390511	6.43025	85.5549	1.02744	86.238	0.00955382	1	0.0020313	0.515833	1	0.115676
TRINITY_DN31930_c0_g1_i3	-6.41878	-0.0733022	6.2936	85.5549	1.05212	78.4447	0.00955722	0.935481	0.0275142	0.515833	1	0.437803
TRINITY_DN34658_c0_g1_i1	0.902474	-0.160152	-1.12187	1.86927	1.1174	2.17629	0.00955745	0.644421	0.000852471	0.515833	1	0.068077
TRINITY_DN27343_c0_g1_i2	-6.41878	0.280306	6.67678	85.5548	1.21445	102.308	0.00956024	0.942236	0.00116426	0.515833	1	0.0826127
TRINITY_DN30004_c0_g2_i6	-6.41878	-1.46829	4.88739	85.5548	2.76694	29.5972	0.00956362	0.385337	0.0901243	0.515833	1	0.694124
TRINITY_DN28966_c0_g1_i2	-6.41878	-1.10355	5.25238	85.5547	2.14883	38.1175	0.00956701	0.5362	0.0602209	0.515833	1	0.599035
TRINITY_DN32588_c0_g1_i4	-4.15095	0.550919	4.61623	17.7648	1.46502	24.5258	0.00959276	0.801389	0.0325024	0.516778	1	0.470666
TRINITY_DN35265_c0_g1_i7	4.20217	3.96284	-0.26933	18.4068	15.5931	1.20525	0.00959692	0.032636	0.815035	0.516778	0.604654	1
TRINITY_DN30717_c0_g1_i6	-1.36404	-0.757202	0.546034	2.57405	1.69021	1.46007	0.00963759	0.148933	0.347486	0.518633	0.996445	0.979053
TRINITY_DN20228_c0_g3_i1	-5.56575	-1.56901	3.96338	47.3651	2.96702	15.599	0.00966299	0.236672	0.130163	0.518825	1	0.784067
TRINITY_DN60927_c0_g1_i1	-5.56576	-2.47073	3.00017	47.3652	5.54326	8.00093	0.00966593	0.0827761	0.610309	0.518825	0.840958	1
TRINITY_DN35023_c0_g1_i2	-0.838983	-1.71589	-0.938559	1.78879	3.28498	1.91661	0.00966715	7.91732e-05	0.0332038	0.518825	0.0223525	0.473439
TRINITY_DN24500_c0_g2_i1	-5.56576	-0.586561	4.96545	47.3652	1.50166	31.2427	0.00966862	0.698815	0.0385339	0.518825	1	0.503737
TRINITY_DN27618_c0_g1_i3	3.63942	2.06179	-1.6083	12.4616	4.17504	3.04892	0.00967343	0.257224	0.175801	0.518825	1	0.852477
TRINITY_DN3788_c0_g1_i1	6.04323	4.355	-1.75081	65.9466	20.4637	3.36547	0.00967847	0.195969	0.138561	0.518825	1	0.802981
TRINITY_DN35715_c0_g1_i3	-1.00153	0.153354	1.10053	2.00212	1.11215	2.14434	0.0096966	0.675818	0.00237098	0.519462	1	0.126379
TRINITY_DN8807_c0_g1_i1	-2.08567	4.39671	6.41239	4.24471	21.064	85.1771	0.00972444	0.000173248	1.06455e-11	0.52062	0.036684	1.55532e-08
TRINITY_DN34323_c0_g1_i3	2.82157	1.67189	-1.19994	7.0693	3.18632	2.29731	0.0097596	0.198303	0.0648623	0.522167	1	0.617729
TRINITY_DN57197_c0_g1_i1	-0.951802	-0.112967	0.779433	1.93429	1.08145	1.71646	0.00976791	0.741538	0.0202907	0.522276	1	0.3828
TRINITY_DN61127_c0_g1_i1	-3.83716	-1.31961	2.47777	14.2922	2.49599	5.57037	0.00979318	0.228046	0.104734	0.523292	1	0.732588
TRINITY_DN34946_c0_g1_i7	-5.45871	-5.44389	0	43.9781	43.5285	0	0.00981672	0.00990987	0	0.524214	0.37035	0
TRINITY_DN33174_c0_g1_i2	1.36525	0.205672	-1.23233	2.57621	1.15322	2.34947	0.00985933	0.908134	0.198794	0.526153	1	0.882856
TRINITY_DN32664_c0_g1_i3	-2.56091	-0.579693	1.92275	5.90081	1.49453	3.79144	0.00987322	0.311961	0.044651	0.526557	1	0.531572
TRINITY_DN31458_c0_g1_i1	-1.40989	-0.550575	0.798933	2.65717	1.46467	1.73981	0.00988353	0.291521	0.132502	0.52677	1	0.790315
TRINITY_DN35427_c0_g1_i5	1.66981	1.4753	-0.222946	3.18172	2.78041	1.16711	0.00992734	0.108151	0.741601	0.528767	0.910599	1
TRINITY_DN27063_c0_g1_i3	1.43434	0.289456	-1.21073	2.70259	1.22218	2.31455	0.00997593	0.69666	0.0223009	0.531016	1	0.399185
TRINITY_DN27499_c0_g1_i1	6.0544	0	-4.22889	66.4593	0	18.7509	0.00999552	0	0.00411536	0.531316	0	0.1698
TRINITY_DN52921_c0_g1_i1	6.14153	3.94601	-2.1794	70.5965	15.4123	4.52966	0.0099976	0.403401	0.0943868	0.531316	1	0.705477
TRINITY_DN32795_c0_g1_i1	2.95035	2.97523	-0.0239666	7.72935	7.86383	1.01675	0.0100027	0.00426337	0.98791	0.531316	0.245346	1
TRINITY_DN2463_c0_g1_i1	1.6832	0.651417	-1.07364	3.21138	1.57071	2.10473	0.0100223	0.344547	0.0880225	0.531316	1	0.688421
TRINITY_DN31949_c0_g1_i2	-1.42967	0.210138	1.58551	2.69386	1.1568	3.00113	0.010039	0.591936	0.00219336	0.531316	1	0.12022
TRINITY_DN23586_c0_g2_i1	-5.54382	-1.97162	3.6909	46.6504	3.92207	12.9143	0.0100436	0.293864	0.368267	0.531316	1	0.998308
TRINITY_DN31912_c0_g1_i5	-5.54382	-0.34926	5.18169	46.6504	1.27391	36.2949	0.0100455	0.785522	0.0616947	0.531316	1	0.603802
TRINITY_DN13180_c0_g1_i1	-5.54382	-5.52619	0	46.6504	46.0838	0	0.0100469	0.00743643	0	0.531316	0.322976	0
TRINITY_DN34122_c1_g1_i4	-1.3406	-0.391348	0.891757	2.53257	1.31162	1.85543	0.0100475	0.313578	0.0724213	0.531316	1	0.641137
TRINITY_DN34077_c0_g1_i1	0.721748	-0.214706	-0.993736	1.64918	1.16047	1.99133	0.0100479	0.440531	0.000148397	0.531316	1	0.0217155
TRINITY_DN51726_c0_g1_i1	3.39889	-4.19307	-7.59393	10.5479	18.2911	193.197	0.0100546	0.180352	2.80166e-06	0.531316	1	0.00101089
TRINITY_DN6273_c0_g1_i1	-0.873431	-0.56358	0.250697	1.83201	1.47793	1.18978	0.0100655	0.0887299	0.451475	0.531316	0.848591	1
TRINITY_DN6144_c0_g1_i2	1.59062	1.23337	-0.411129	3.01178	2.35116	1.32973	0.0100682	0.0499353	0.352757	0.531316	0.70102	0.985686
TRINITY_DN14026_c0_g2_i1	-1.48982	-0.0641025	1.3732	2.80854	1.04543	2.59045	0.0100735	0.849038	0.0127737	0.531316	1	0.308113
TRINITY_DN51517_c0_g1_i1	-1.06873	-0.639547	0.377091	2.09759	1.55784	1.29872	0.0100771	0.00727603	0.323186	0.531316	0.32008	0.961188
TRINITY_DN9410_c0_g1_i2	6.09809	5.53943	-0.628689	68.5029	46.5088	1.54616	0.0101141	0.057438	0.612147	0.532929	0.73574	1
TRINITY_DN27181_c0_g1_i1	-1.89524	-0.140937	1.70271	3.71984	1.10262	3.25512	0.0101365	0.690883	0.0122261	0.533761	1	0.302375
TRINITY_DN35780_c0_g1_i6	-5.24107	-1.20509	4.00072	37.8198	2.30551	16.008	0.0101427	0.358568	0.00877648	0.533761	1	0.257172
TRINITY_DN35891_c0_g1_i1	7.18169	6.6182	-0.618814	145.179	98.2372	1.53561	0.0101789	0.0668785	0.749042	0.53533	0.779083	1
TRINITY_DN32296_c0_g1_i4	-1.97546	0.163347	2.08969	3.93254	1.11988	4.25656	0.0102028	0.819783	0.00271551	0.535949	1	0.137195
TRINITY_DN34509_c0_g1_i3	6.99079	10.2822	3.26752	127.186	1245.21	9.62991	0.0102035	6.75066e-17	0.000128798	0.535949	8.24969e-13	0.019791
TRINITY_DN32047_c0_g2_i6	0.667578	0.501452	-0.223138	1.5884	1.41564	1.16727	0.0102239	0.0390668	0.336017	0.536679	0.643174	0.971829
TRINITY_DN35846_c0_g1_i1	-0.598255	-0.490556	0.0492275	1.51388	1.40499	1.03471	0.0102539	0.0391471	0.834861	0.537818	0.644124	1
TRINITY_DN30863_c1_g1_i6	0.991181	0.220191	-0.834549	1.98781	1.16489	1.7833	0.0102585	0.673333	0.0633577	0.537818	1	0.610902
TRINITY_DN34653_c1_g1_i2	6.08446	5.65908	-0.449636	67.8587	50.5304	1.3657	0.0103054	0.0538413	0.722323	0.539746	0.720292	1
TRINITY_DN45893_c353_g1_i1	-1.50961	-0.357699	1.10645	2.84734	1.28138	2.15316	0.0103082	0.526771	0.0490987	0.539746	1	0.554154
TRINITY_DN46033_c0_g1_i1	-1.19801	-0.965394	0.181201	2.29424	1.9526	1.13383	0.0103419	0.0157593	0.68666	0.540089	0.449374	1
TRINITY_DN36072_c0_g2_i1	-4.30233	-2.21014	2.03105	19.7301	4.62721	4.08702	0.0103556	0.136237	0.464546	0.540089	0.968233	1
TRINITY_DN34242_c0_g1_i7	-6.49301	-6.47526	0	90.0725	88.9707	0	0.010363	0.00841072	0	0.540089	0.342222	0
TRINITY_DN33823_c0_g2_i6	-6.49302	-0.957537	5.47701	90.0726	1.94199	44.5395	0.0103655	0.555766	0.0268489	0.540089	1	0.433013
TRINITY_DN29600_c0_g1_i9	2.69434	2.13645	-0.622333	6.47256	4.39679	1.53936	0.010367	0.0481346	0.362397	0.540089	0.693097	0.996653
TRINITY_DN19825_c0_g1_i2	-6.49302	1.87553	8.32491	90.0726	3.66937	320.661	0.0103678	0.104932	7.55939e-10	0.540089	0.901508	6.87457e-07
TRINITY_DN34988_c0_g1_i1	-6.49302	0.703091	7.15052	90.0726	1.62799	142.076	0.0103694	0.612404	5.88582e-06	0.540089	1	0.00182772
TRINITY_DN30058_c0_g1_i2	-6.49302	0.74376	7.19661	90.0726	1.67453	146.688	0.0103711	0.695666	0.000389105	0.540089	1	0.0423329
TRINITY_DN32588_c0_g1_i12	-6.49302	0.00947115	6.47369	90.0727	1.00659	88.8738	0.0103733	1	0.00181932	0.540089	1	0.109036
TRINITY_DN25039_c0_g1_i2	-5.71614	0.598948	6.27073	52.5689	1.51461	77.2109	0.0103795	0.724902	0.00282688	0.540089	1	0.140905
TRINITY_DN30924_c0_g1_i2	-1.27881	-0.537942	0.68192	2.42638	1.4519	1.60427	0.0103956	0.20396	0.150732	0.540518	1	0.80757
TRINITY_DN34680_c0_g3_i2	-1.78568	-0.441592	1.28087	3.44781	1.3581	2.42986	0.0104007	0.322925	0.0500071	0.540518	1	0.558627
TRINITY_DN25202_c0_g1_i1	5.94391	3.85149	-2.12509	61.5597	14.4349	4.3623	0.0104116	0.232793	0.0691806	0.54073	1	0.633401
TRINITY_DN7632_c0_g2_i1	-1.87415	-0.0808129	1.73806	3.66586	1.05761	3.33586	0.0104177	0.864863	0.0100876	0.54073	1	0.275703
TRINITY_DN35215_c0_g1_i7	-3.40295	-0.816664	2.53682	10.5776	1.76133	5.8031	0.0104299	0.165271	0.0493278	0.541024	1	0.555018
TRINITY_DN34299_c0_g1_i1	1.20227	0.42911	-0.833102	2.30102	1.3464	1.78151	0.0104365	0.382737	0.0328524	0.541032	1	0.471858
TRINITY_DN34186_c0_g2_i7	-1.31973	-0.105322	1.16114	2.4962	1.07573	2.23634	0.0104459	0.748477	0.0147105	0.54118	1	0.330385
TRINITY_DN20920_c0_g2_i1	-1.51665	-0.597442	0.859844	2.86127	1.51303	1.81484	0.0104543	0.293662	0.134831	0.54128	1	0.795494
TRINITY_DN20937_c0_g1_i1	-1.01008	0.264162	1.21387	2.01402	1.20094	2.31959	0.010467	0.491875	0.000372546	0.541499	1	0.0411936
TRINITY_DN19637_c0_g1_i2	-1.49977	-0.338685	1.09942	2.82799	1.2646	2.14269	0.0104753	0.536908	0.0434239	0.541499	1	0.526493
TRINITY_DN46105_c0_g1_i1	-0.755758	0.248569	0.946809	1.68852	1.18803	1.9276	0.0104805	0.335502	0.00055173	0.541499	1	0.0523655
TRINITY_DN28307_c0_g1_i4	7.31496	8.57745	1.21942	159.229	382.004	2.32853	0.0104845	1.28867e-07	0.262785	0.541499	0.000162114	0.949016
TRINITY_DN46084_c0_g1_i1	-5.66203	-5.64758	0	50.6337	50.1293	0	0.0104971	0.00794242	0	0.541797	0.332926	0
TRINITY_DN8913_c0_g1_i1	-0.919549	-0.075549	0.787601	1.89152	1.05376	1.7262	0.0105032	0.784002	0.0154396	0.541797	1	0.337837
TRINITY_DN25591_c0_g1_i7	-3.60552	-0.414399	3.15028	12.1722	1.33274	8.87826	0.010525	0.653318	0.0163741	0.542585	1	0.34617
TRINITY_DN35006_c0_g1_i5	3.17519	1.27819	-1.93856	9.03292	2.42535	3.83323	0.0105413	0.46249	0.047284	0.543088	1	0.544731
TRINITY_DN34473_c0_g1_i5	6.94405	7.98262	0.999301	123.131	252.934	1.99903	0.0105566	2.5629e-05	0.338551	0.543539	0.0105404	0.973046
TRINITY_DN25024_c0_g1_i1	5.96156	3.7101	-2.2301	62.3171	13.0873	4.69167	0.0106021	0.493447	0.0718417	0.545004	1	0.638942
TRINITY_DN30766_c0_g1_i2	-2.10579	-1.31642	0.733838	4.30434	2.49048	1.66306	0.0106157	0.0461431	0.406658	0.545004	0.684101	1
TRINITY_DN22238_c0_g2_i1	-1.114	-0.23606	0.826036	2.16444	1.17777	1.77281	0.0106179	0.487304	0.0477318	0.545004	1	0.547198
TRINITY_DN31250_c0_g1_i3	-1.07665	0.037304	1.05913	2.10913	1.02619	2.08368	0.0106202	0.920042	0.00638046	0.545004	1	0.217619
TRINITY_DN31855_c0_g1_i2	3.31155	2.81641	-0.544717	9.92831	7.04406	1.45873	0.0106229	0.0228382	0.466485	0.545004	0.523017	1
TRINITY_DN33707_c0_g1_i1	-2.95819	-0.0557823	2.84974	7.77148	1.03942	7.20873	0.0106242	0.978616	0.00574564	0.545004	1	0.204825
TRINITY_DN30942_c0_g1_i1	-3.4781	-0.740218	2.66362	11.1432	1.67043	6.33619	0.0106468	0.480975	0.0904343	0.545827	1	0.695245
TRINITY_DN7061_c0_g1_i1	-1.12954	-0.465464	0.609424	2.18788	1.38076	1.52565	0.0107017	0.192536	0.152739	0.547698	1	0.811035
TRINITY_DN28626_c0_g1_i2	-6.35574	0.111464	6.43313	81.8971	1.08032	86.4104	0.0107192	1	0.00401049	0.547698	1	0.167726
TRINITY_DN27092_c0_g1_i1	-1.0924	-0.51347	0.52503	2.13228	1.42748	1.43896	0.0107248	0.0857217	0.199483	0.547698	0.844393	0.883581
TRINITY_DN25310_c0_g1_i6	2.73438	0.320774	-2.46281	6.65472	1.249	5.51288	0.0107319	0.821101	0.00497166	0.547698	1	0.188949
TRINITY_DN28915_c0_g1_i1	-0.746575	-0.156366	0.533228	1.6778	1.11448	1.44716	0.0107474	0.515771	0.0524981	0.547698	1	0.570786
TRINITY_DN32975_c1_g1_i2	-5.35498	1.34608	6.66943	40.927	2.5422	101.788	0.010753	0.30611	0.000303109	0.547698	1	0.0362113
TRINITY_DN23537_c0_g1_i1	-5.35498	0.248946	5.55869	40.927	1.18834	47.1337	0.0107542	0.985626	0.00334756	0.547698	1	0.152604
TRINITY_DN31190_c0_g1_i4	-5.35498	-0.45684	4.87629	40.927	1.37253	29.3703	0.0107544	0.733963	0.0916363	0.547698	1	0.698795
TRINITY_DN26231_c0_g1_i2	-5.35498	-0.148908	5.15603	40.927	1.10873	35.6549	0.0107556	0.841822	0.0244176	0.547698	1	0.414274
TRINITY_DN28335_c0_g1_i5	-5.35498	-5.3393	0	40.927	40.4846	0	0.0107574	0.00775008	0	0.547698	0.328628	0
TRINITY_DN35260_c0_g1_i5	-1.06381	-0.731428	0.271091	2.09045	1.66028	1.20672	0.0107579	0.0532075	0.512931	0.547698	0.717915	1
TRINITY_DN52382_c0_g1_i1	5.90032	7.17066	1.24306	59.7275	144.074	2.367	0.0107621	0.000394024	0.152702	0.547698	0.0643252	0.810976
TRINITY_DN23891_c0_g1_i1	5.88219	7.79559	1.87867	58.9813	222.181	3.67735	0.0107844	1.39726e-05	0.0130093	0.548498	0.00660365	0.309284
TRINITY_DN26278_c0_g1_i4	0.879895	0.317534	-0.613425	1.84024	1.2462	1.52989	0.0108092	0.422499	0.0732074	0.549346	1	0.644093
TRINITY_DN24825_c0_g2_i1	-1.32991	-0.330647	0.949005	2.51387	1.25758	1.93054	0.0108142	0.205287	0.0482679	0.549346	1	0.549631
TRINITY_DN34540_c0_g2_i10	-0.63971	-0.28272	0.299206	1.55802	1.21649	1.23047	0.0108536	0.230158	0.210069	0.550734	1	0.895898
TRINITY_DN30582_c0_g1_i2	5.90326	3.46023	-2.45441	59.8492	11.0061	5.48088	0.0108548	0.537297	0.0279072	0.550734	1	0.440291
TRINITY_DN30450_c0_g1_i3	-3.3712	-3.45192	-0.174112	10.3474	10.9429	1.12827	0.0108746	0.0108397	1	0.551403	0.38911	1
TRINITY_DN33158_c0_g1_i5	-1.42365	-0.878284	0.493109	2.68264	1.83819	1.40747	0.0108995	0.0305434	0.324557	0.552332	0.587941	0.962696
TRINITY_DN24759_c0_g1_i2	-1.12851	-0.501929	0.573116	2.18633	1.41611	1.48773	0.0109275	0.160258	0.172196	0.553414	1	0.845132
TRINITY_DN26913_c2_g2_i2	-1.42369	-0.0528766	1.3221	2.68271	1.03733	2.5003	0.0109439	0.860859	0.0139379	0.553907	1	0.3212
TRINITY_DN33100_c0_g1_i1	-1.0772	-0.310882	0.712326	2.10994	1.24047	1.63844	0.0109554	0.29424	0.0719675	0.553975	1	0.639172
TRINITY_DN26338_c0_g2_i2	-3.64515	-1.0505	2.51402	12.5112	2.07125	5.71211	0.0109667	0.37493	0.160149	0.553975	1	0.823302
TRINITY_DN35062_c0_g2_i1	-5.37742	-0.120683	5.22046	41.5686	1.08725	37.2834	0.0109852	0.9843	0.00727821	0.553975	1	0.233954
TRINITY_DN33067_c0_g1_i4	2.92086	0.550701	-2.37274	7.57298	1.4648	5.17923	0.0109855	0.798919	0.00921057	0.553975	1	0.262929
TRINITY_DN13495_c0_g1_i1	-0.764268	0.34224	1.0433	1.69851	1.26772	2.06094	0.0109861	0.304681	0.000878255	0.553975	1	0.0693285
TRINITY_DN30015_c0_g1_i3	-5.37742	-5.3607	0	41.5686	41.0895	0	0.0109864	0.00779943	0	0.553975	0.328991	0
TRINITY_DN22025_c0_g1_i1	-1.15668	-0.547975	0.55206	2.22944	1.46203	1.46618	0.0109917	0.0750718	0.20707	0.553975	0.811165	0.890842
TRINITY_DN12459_c0_g1_i1	6.09016	4.5798	-1.57604	68.1271	23.9143	2.98151	0.0110353	0.178586	0.236548	0.555572	1	0.914123
TRINITY_DN34339_c0_g2_i2	6.96133	7.66027	0.670402	124.615	202.289	1.59152	0.0110367	1.60367e-05	0.518872	0.555572	0.00741539	1
TRINITY_DN21047_c0_g1_i5	-2.75298	-1.29497	1.40029	6.74107	2.45372	2.63954	0.0110725	0.10674	0.174903	0.55704	0.906929	0.850484
TRINITY_DN32159_c1_g1_i1	0.874284	0.535367	-0.390773	1.8331	1.44931	1.3111	0.0111108	0.0577435	0.220812	0.558446	0.737145	0.905417
TRINITY_DN34039_c0_g1_i1	-0.717144	-0.432666	0.229267	1.64392	1.34973	1.17224	0.0111139	0.0640707	0.380746	0.558446	0.764715	1
TRINITY_DN35622_c1_g1_i5	-3.86313	0.29444	4.12946	14.5518	1.22641	17.5022	0.0111278	0.818568	0.000235964	0.558807	1	0.0301716
TRINITY_DN28624_c0_g1_i2	6.86592	8.01696	1.09854	116.64	259.026	2.14138	0.0111457	9.62755e-06	0.279848	0.559115	0.00508382	0.960714
TRINITY_DN32471_c0_g1_i2	-3.50601	1.88627	5.3719	11.3609	3.69677	41.4098	0.0111517	0.0145842	7.12073e-08	0.559115	0.437139	4.17509e-05
TRINITY_DN35776_c0_g1_i3	8.15417	9.27763	1.08849	284.873	620.649	2.12651	0.0111541	0.00025989	0.52252	0.559115	0.0479799	1
TRINITY_DN32764_c0_g1_i2	0.740567	0.134851	-0.66418	1.67083	1.09798	1.58467	0.0111607	0.640416	0.0138304	0.559115	1	0.319739
TRINITY_DN32393_c0_g1_i1	0.909576	0.241957	-0.719794	1.87849	1.1826	1.64695	0.0111918	0.403603	0.0283217	0.560203	1	0.443685
TRINITY_DN21438_c0_g1_i2	6.61919	6.27608	-0.383616	98.3048	77.4979	1.30461	0.0112031	0.00637387	0.770569	0.560203	0.298885	1
TRINITY_DN29894_c0_g1_i2	6.94804	7.199	0.195486	123.472	146.931	1.14511	0.0112038	0.00414858	0.89174	0.560203	0.24242	1
TRINITY_DN24874_c0_g2_i2	-0.975656	-0.956809	-0.037553	1.96654	1.94101	1.02637	0.0112093	0.065516	0.937934	0.560203	0.773354	1
TRINITY_DN291_c0_g1_i1	-1.69286	-0.164414	1.47425	3.23296	1.12071	2.77839	0.0112307	0.666799	0.0169828	0.560936	1	0.352092
TRINITY_DN33920_c0_g1_i1	0.733551	-0.214564	-1.00778	1.66273	1.16035	2.01081	0.0112494	0.468735	0.000230408	0.561537	1	0.029717
TRINITY_DN34830_c0_g1_i2	3.18797	-5.33391	-8.53418	9.1133	40.3337	370.719	0.0112789	0.0385896	1.34928e-08	0.562669	0.639626	1.00209e-05
TRINITY_DN13728_c0_g2_i1	-0.876435	-0.070735	0.748928	1.83583	1.05025	1.68054	0.0112942	0.79986	0.0209421	0.563097	1	0.38843
TRINITY_DN31247_c0_g1_i6	7.01837	7.96478	0.885131	129.64	249.827	1.84693	0.0113449	1.37472e-05	0.410188	0.565009	0.00660365	1
TRINITY_DN28966_c0_g1_i3	-3.25581	-1.56311	1.65677	9.55203	2.95491	3.1531	0.0113463	0.0314616	0.204401	0.565009	0.597209	0.888294
TRINITY_DN27674_c0_g1_i1	-1.30331	-0.931901	0.307239	2.46794	1.90779	1.23734	0.0113809	0.0491117	0.559039	0.565009	0.697065	1
TRINITY_DN28967_c0_g1_i3	-3.63641	-0.706012	2.88234	12.4357	1.63129	7.37344	0.0113811	0.513271	0.00721782	0.565009	1	0.233237
TRINITY_DN23113_c0_g2_i2	6.8843	0	-6.90802	118.136	0	120.094	0.0113823	0	0.00129134	0.565009	0	0.0881217
TRINITY_DN35208_c0_g1_i5	-6.41947	-0.032348	6.32651	85.5957	1.02268	80.2542	0.0113974	1	0.00430197	0.565009	1	0.174511
TRINITY_DN30504_c0_g1_i4	-6.41947	-6.40171	0	85.5957	84.5485	0	0.0113993	0.00944015	0	0.565009	0.361507	0
TRINITY_DN27569_c0_g1_i4	-6.41947	-6.40171	0	85.5957	84.5485	0	0.0114018	0.00944097	0	0.565009	0.361507	0
TRINITY_DN35724_c0_g1_i12	-6.41947	-6.40171	0	85.5957	84.5485	0	0.0114032	0.00944181	0	0.565009	0.361507	0
TRINITY_DN36059_c2_g1_i2	-6.41947	-0.332414	6.05678	85.5958	1.25912	66.5689	0.0114044	0.78614	0.00426939	0.565009	1	0.173496
TRINITY_DN28166_c0_g1_i1	-1.14684	-0.42546	0.660922	2.21428	1.343	1.58109	0.0114071	0.319773	0.117046	0.565009	1	0.756383
TRINITY_DN19691_c0_g1_i1	-0.641404	-0.395885	0.186435	1.55985	1.31575	1.13795	0.011459	0.106364	0.445145	0.567093	0.905259	1
TRINITY_DN30492_c0_g1_i2	6.24147	0	-6.26501	75.6604	0	76.9052	0.0114628	0	0.00120298	0.567093	0	0.0847524
TRINITY_DN31447_c0_g1_i2	-0.901577	0.731776	1.57481	1.86811	1.66068	2.97896	0.0115012	0.0121575	1.07711e-06	0.568657	0.403569	0.000459304
TRINITY_DN5244_c0_g2_i1	0.640954	-0.250398	-0.95106	1.55936	1.18954	1.93329	0.0115081	0.286195	5.88431e-05	0.56866	1	0.0112136
TRINITY_DN26495_c0_g1_i2	-1.13834	-0.917728	0.162912	2.20127	1.88914	1.11954	0.011518	0.0383232	0.719838	0.568814	0.639626	1
TRINITY_DN39824_c0_g1_i1	-1.44187	-0.651368	0.738133	2.71673	1.57066	1.66802	0.0115279	0.184163	0.1757	0.568967	1	0.852176
TRINITY_DN61413_c0_g1_i1	-1.44459	-0.185884	1.20947	2.72186	1.13751	2.31252	0.011562	0.583916	0.0266796	0.570311	1	0.432003
TRINITY_DN19399_c0_g1_i1	5.82702	0	-5.84642	56.7686	0	57.537	0.0115844	0	0.00100995	0.571079	0	0.0751927
TRINITY_DN31370_c0_g1_i7	-3.6243	1.02147	4.60595	12.3317	2.02999	24.3517	0.0116044	0.433352	0.00318653	0.57134	1	0.148686
TRINITY_DN25059_c0_g1_i1	-2.55571	-0.0639793	2.44062	5.87958	1.04535	5.42875	0.0116092	0.893862	0.00965351	0.57134	1	0.268437
TRINITY_DN16353_c0_g3_i1	-0.897795	-0.840684	-0.00454618	1.86322	1.7909	1.00316	0.0116102	0.0165826	0.99362	0.57134	0.459988	1
TRINITY_DN18110_c0_g1_i1	-0.965741	-0.737003	0.171575	1.95307	1.66671	1.12629	0.0116182	0.0390026	0.612383	0.571393	0.642365	1
TRINITY_DN35884_c0_g2_i3	6.89154	0	-6.91362	118.73	0	120.561	0.0117046	0	0.00134426	0.575058	0	0.0902811
TRINITY_DN21870_c0_g2_i3	2.68938	1.77205	-0.957742	6.45038	3.4154	1.94227	0.0117118	0.20101	0.178524	0.575058	1	0.857805
TRINITY_DN32445_c0_g1_i2	1.74599	0.994836	-0.815435	3.35426	1.99285	1.75983	0.0117134	0.13617	0.126943	0.575058	0.968128	0.775849
TRINITY_DN35622_c1_g1_i6	-2.50694	-0.201407	2.24757	5.68414	1.14982	4.74883	0.0117253	0.733508	0.0163668	0.575303	1	0.34617
TRINITY_DN31949_c0_g1_i1	-1.41998	-0.0329913	1.33411	2.67581	1.02313	2.5212	0.0117375	0.912674	0.0116248	0.575567	1	0.296091
TRINITY_DN24103_c0_g1_i3	6.02288	0	-6.03935	65.023	0	65.7695	0.0117807	0	0.00117806	0.577346	0	0.0832319
TRINITY_DN29486_c0_g1_i3	7.05361	7.74399	0.680109	132.846	214.374	1.60226	0.0117978	0.00213985	0.636504	0.577721	0.175505	1
TRINITY_DN36059_c2_g1_i5	1.59597	-0.815581	-2.45764	3.02298	1.76001	5.49318	0.0118041	0.421386	0.00231524	0.577721	1	0.12445
TRINITY_DN32092_c0_g1_i4	-6.28989	0.589471	6.8628	78.2429	1.5047	116.388	0.0118156	0.768917	0.000834081	0.577721	1	0.0674546
TRINITY_DN33538_c0_g1_i7	-6.28989	0.270238	6.54316	78.2429	1.20601	93.2582	0.0118161	0.922461	0.00293961	0.577721	1	0.143082
TRINITY_DN35707_c0_g1_i6	-2.5888	0.155473	2.68048	6.01598	1.11379	6.41071	0.0118567	0.903005	0.00911748	0.578932	1	0.261719
TRINITY_DN30406_c0_g1_i2	-1.41262	-0.502745	0.85357	2.66221	1.41691	1.80697	0.011858	0.208069	0.107088	0.578932	1	0.734423
TRINITY_DN35851_c0_g1_i6	5.41448	5.42923	-0.0328729	42.6502	43.0886	1.02305	0.0118685	0.0125099	1	0.578932	0.410363	1
TRINITY_DN32067_c0_g1_i2	1.4163	0.455019	-1.03404	2.66901	1.3708	2.04774	0.0118748	0.532944	0.0701626	0.578932	1	0.635181
TRINITY_DN6409_c0_g1_i1	6.85337	8.12567	1.22711	115.63	279.3	2.34098	0.0118829	1.27506e-06	0.20002	0.578932	0.00107994	0.884753
TRINITY_DN27986_c0_g1_i2	-1.02278	0.172359	1.14083	2.03183	1.1269	2.20508	0.0118938	0.646153	0.00191496	0.578932	1	0.112132
TRINITY_DN30318_c1_g1_i4	-5.33195	-1.88016	3.34946	40.2787	3.68116	10.1927	0.0119253	0.20483	0.421344	0.578932	1	1
TRINITY_DN61136_c0_g1_i1	-5.33195	-1.8564	3.42334	40.2787	3.62102	10.7282	0.0119261	0.206703	0.426779	0.578932	1	1
TRINITY_DN33724_c0_g1_i14	-5.33195	-1.13224	4.16271	40.2787	2.19198	17.9102	0.0119263	0.437992	0.107867	0.578932	1	0.735811
TRINITY_DN3711_c0_g2_i1	-5.33195	-5.31718	0	40.2787	39.8685	0	0.0119289	0.0123503	0	0.578932	0.40677	0
TRINITY_DN28011_c0_g2_i11	-5.33194	1.46705	6.75718	40.2787	2.76455	108.172	0.0119304	0.299592	0.000999429	0.578932	1	0.0749127
TRINITY_DN25262_c0_g2_i3	-5.33194	-1.33971	3.94644	40.2787	2.53101	15.4169	0.0119309	0.336393	0.137216	0.578932	1	0.799225
TRINITY_DN28609_c0_g1_i2	3.30508	3.07661	-0.289525	9.88389	8.43631	1.22224	0.0119311	0.0219355	0.726111	0.578932	0.514942	1
TRINITY_DN26751_c0_g1_i2	-0.61454	-0.259185	0.299468	1.53107	1.1968	1.23069	0.0119644	0.258384	0.205615	0.580209	1	0.889431
TRINITY_DN34698_c0_g1_i2	-0.941106	-2.05952	-1.18361	1.92	4.16848	2.27145	0.0119818	0.0504118	0.229161	0.580715	0.70143	0.911331
TRINITY_DN34510_c0_g1_i17	7.03149	6.95443	-0.103888	130.825	124.02	1.07467	0.0119973	0.00932109	0.964747	0.581132	0.360635	1
TRINITY_DN33006_c0_g1_i7	-2.56418	-0.610945	1.89866	5.9142	1.52726	3.72866	0.0120083	0.258416	0.0448233	0.581328	1	0.532684
TRINITY_DN25539_c0_g1_i1	-1.01204	-0.403601	0.551009	2.01676	1.32281	1.46511	0.012025	0.254554	0.14787	0.581796	1	0.807327
TRINITY_DN35030_c0_g1_i3	7.10845	5.72984	-1.42945	137.993	53.0704	2.69343	0.0120487	0.130238	0.428847	0.582604	0.950604	1
TRINITY_DN34129_c1_g1_i3	0.766321	-0.0752332	-0.900607	1.70093	1.05353	1.86685	0.0120591	0.804725	0.00129347	0.582693	1	0.0881234
TRINITY_DN29012_c0_g1_i2	-3.40129	0.688373	4.01185	10.5655	1.61146	16.1319	0.0120645	0.653888	0.0158808	0.582693	1	0.341701
TRINITY_DN53130_c0_g1_i1	-1.82927	-0.887823	0.889355	3.55358	1.85038	1.85235	0.0120899	0.159778	0.245584	0.583584	1	0.928713
TRINITY_DN45942_c0_g1_i1	-0.691647	-0.503402	0.125034	1.61513	1.41755	1.09053	0.0121133	0.0703306	0.652149	0.584373	0.79416	1
TRINITY_DN31416_c1_g1_i1	0.669985	0.363051	-0.363423	1.59106	1.28614	1.28647	0.0121291	0.14518	0.13367	0.584702	0.991152	0.792612
TRINITY_DN5965_c0_g1_i1	-0.869649	0.0777013	0.888421	1.82722	1.05534	1.85115	0.0121341	0.806891	0.00575845	0.584702	1	0.204959
TRINITY_DN26619_c0_g1_i1	-1.06517	-0.573588	0.437493	2.09242	1.48822	1.35425	0.0121508	0.0543689	0.276851	0.585166	0.722388	0.960714
TRINITY_DN33187_c0_g1_i8	-2.54542	-0.617684	1.87058	5.83777	1.53441	3.65679	0.0121933	0.501968	0.035247	0.586876	1	0.485997
TRINITY_DN43336_c0_g1_i1	-2.1451	-2.05552	0.0212938	4.42322	4.15695	1.01487	0.0122105	0.0303699	1	0.587226	0.586501	1
TRINITY_DN32974_c0_g1_i1	-0.641621	-0.81689	-0.233538	1.56008	1.7616	1.17571	0.0122147	0.000487704	0.327631	0.587226	0.0729922	0.965167
TRINITY_DN32643_c0_g1_i4	-3.49869	-2.77376	0.674754	11.3034	6.83886	1.59632	0.012242	0.0334816	0.886942	0.587644	0.607396	1
TRINITY_DN26091_c0_g1_i2	-5.40013	-0.128109	5.20923	42.228	1.09286	36.9943	0.0122473	0.91045	0.026819	0.587644	1	0.432739
TRINITY_DN27538_c0_g1_i4	-5.40013	-0.188152	5.18308	42.228	1.1393	36.3299	0.0122492	0.91042	0.0303313	0.587644	1	0.457484
TRINITY_DN48986_c0_g1_i1	-5.40013	0.586189	5.96333	42.228	1.50128	62.3937	0.0122515	0.700955	0.00293323	0.587644	1	0.143027
TRINITY_DN33323_c0_g1_i1	-0.993656	-0.229275	0.705502	1.99122	1.17225	1.63071	0.0122791	0.548619	0.0799277	0.588628	1	0.664674
TRINITY_DN4626_c0_g2_i1	-0.637171	-0.74494	-0.167992	1.55528	1.6759	1.12349	0.0123102	0.00361003	0.493212	0.589684	0.226239	1
TRINITY_DN26890_c0_g1_i2	1.30226	-0.29067	-1.64839	2.46615	1.22321	3.13483	0.0123234	0.639264	0.00102173	0.589684	1	0.0756362
TRINITY_DN33894_c3_g2_i1	-0.726036	-0.372608	0.296994	1.65409	1.29469	1.22858	0.0123286	0.163842	0.293538	0.589684	1	0.960714
TRINITY_DN33302_c0_g1_i5	6.86838	5.30045	-1.63393	116.839	39.409	3.10358	0.0123294	0.138717	0.303801	0.589684	0.974364	0.960714
TRINITY_DN32495_c0_g2_i9	-6.34192	-6.32413	0	81.1161	80.1221	0	0.0123785	0.010394	0	0.59015	0.381085	0
TRINITY_DN28312_c0_g1_i8	-6.34192	-6.32413	0	81.1161	80.1221	0	0.012379	0.0103956	0	0.59015	0.381085	0
TRINITY_DN25833_c0_g1_i2	-6.34192	0.249061	6.56118	81.1161	1.18843	94.4302	0.0123795	0.949311	0.00143839	0.59015	1	0.0947735
TRINITY_DN35472_c0_g1_i7	-6.34192	-0.564459	5.77049	81.1161	1.47883	54.5873	0.0123811	0.705714	0.0142647	0.59015	1	0.325194
TRINITY_DN30079_c0_g1_i2	-6.34192	-1.15872	5.18169	81.1161	2.23259	36.2949	0.0123813	0.495483	0.0616978	0.59015	1	0.603802
TRINITY_DN31032_c0_g1_i5	2.87498	3.50727	0.607696	7.33592	11.3708	1.52382	0.0123846	0.0374556	0.542402	0.59015	0.635035	1
TRINITY_DN31714_c0_g1_i8	1.42571	0.360827	-1.1394	2.68646	1.28416	2.20289	0.0123887	0.648547	0.0395852	0.59015	1	0.508784
TRINITY_DN35656_c0_g1_i3	6.9713	6.94394	-0.0510899	125.479	123.122	1.03605	0.0124073	0.0008833	1	0.5907	0.105385	1
TRINITY_DN31854_c0_g1_i3	0.820979	1.54699	0.669355	1.7666	2.92208	1.59036	0.0124271	5.12059e-09	0.0161556	0.591037	1.04294e-05	0.344206
TRINITY_DN29703_c0_g2_i4	6.84011	4.82685	-2.07319	114.572	28.381	4.20816	0.0124286	0.203544	0.183669	0.591037	1	0.863341
TRINITY_DN33381_c0_g1_i2	0.914746	0.184594	-0.78677	1.88524	1.1365	1.72521	0.0124365	0.642492	0.0171527	0.591075	1	0.353779
TRINITY_DN14852_c0_g1_i1	4.21661	-0.300707	-4.61781	18.5919	1.23175	24.5527	0.0124546	1	0.00330789	0.591388	1	0.151644
TRINITY_DN56011_c0_g1_i1	-1.44719	-0.134003	1.261	2.72677	1.09733	2.39662	0.0124572	0.706293	0.0201473	0.591388	1	0.381468
TRINITY_DN25582_c0_g3_i1	0.741025	-0.0329365	-0.834454	1.67136	1.02309	1.78318	0.0124789	0.895322	0.00251399	0.592079	1	0.131024
TRINITY_DN15162_c0_g3_i1	-2.78648	-0.635982	2.09237	6.89946	1.554	4.26448	0.0124895	0.432442	0.0541772	0.592247	1	0.5771
TRINITY_DN28175_c0_g2_i2	-0.721033	-0.101858	0.556881	1.64836	1.07315	1.47109	0.0124981	0.742934	0.0722145	0.592318	1	0.640495
TRINITY_DN46843_c0_g1_i1	-1.16209	-0.49735	0.607157	2.23781	1.41162	1.52325	0.0125404	0.236902	0.168708	0.593985	1	0.839838
TRINITY_DN35151_c0_g1_i1	6.1358	5.85975	-0.313388	70.3169	58.0712	1.24262	0.0125521	0.0379246	0.785322	0.594203	0.638249	1
TRINITY_DN15928_c0_g1_i1	-1.41378	-0.601747	0.751062	2.66435	1.51755	1.68303	0.0125649	0.367765	0.268829	0.594469	1	0.952325
TRINITY_DN2485_c0_g1_i1	4.03992	0.39449	-3.69502	16.4489	1.31448	12.9513	0.0126121	1	0.00616304	0.596365	1	0.213392
TRINITY_DN13146_c0_g2_i2	2.04711	2.40101	0.282795	4.13277	5.28172	1.21655	0.0126278	0.0964851	0.780156	0.596767	0.873011	1
TRINITY_DN46203_c0_g1_i1	-0.98348	-0.3757	0.554424	1.97723	1.29747	1.46858	0.0126423	0.262393	0.144028	0.596879	1	0.807327
TRINITY_DN35765_c0_g1_i7	-5.58841	-1.1259	4.44417	48.1149	2.18238	21.7685	0.0126498	0.505241	0.0799262	0.596879	1	0.664674
TRINITY_DN4259_c0_g2_i1	-5.43542	-5.42119	0	43.2737	42.8491	0	0.0126516	0.0125463	0	0.596879	0.410581	0
TRINITY_DN35289_c0_g1_i1	-1.04554	-0.565504	0.426787	2.06414	1.4799	1.34424	0.0126597	0.0313263	0.282096	0.596923	0.595903	0.960714
TRINITY_DN27573_c0_g1_i5	1.3166	0.328778	-1.04944	2.49078	1.25595	2.06973	0.0126841	0.541732	0.0191209	0.597056	1	0.371992
TRINITY_DN35934_c0_g4_i3	5.92158	4.6386	-1.2973	60.6139	24.9091	2.45768	0.0126954	0.147001	0.220235	0.597056	0.993844	0.904088
TRINITY_DN33987_c0_g1_i2	-3.36715	-1.54829	1.75298	10.3184	2.9247	3.37053	0.0127002	0.0842756	0.203635	0.597056	0.844393	0.888294
TRINITY_DN32613_c0_g1_i2	-1.05478	0.429403	1.42963	2.07741	1.34668	2.69377	0.0127059	0.26434	0.00031487	0.597056	1	0.0370209
TRINITY_DN29994_c0_g1_i1	0.672391	0.0371237	-0.693115	1.59371	1.02607	1.61677	0.0127068	0.891697	0.004702	0.597056	1	0.183875
TRINITY_DN35572_c0_g1_i12	-0.65923	-0.942839	-0.34364	1.57924	1.92231	1.26895	0.012712	0.000206806	0.199218	0.597056	0.040669	0.883492
TRINITY_DN16_c0_g1_i1	-3.75623	-2.91469	0.738455	13.5126	7.54066	1.66839	0.0127126	0.0252534	1	0.597056	0.542647	1
TRINITY_DN31794_c0_g1_i1	6.81615	5.69586	-1.17631	112.685	51.835	2.25999	0.0127294	0.0535726	0.41208	0.597509	0.719067	1
TRINITY_DN30368_c0_g2_i1	8.5261	0	-8.55484	368.649	0	376.065	0.0127477	0	0.00153772	0.598033	0	0.0985966
TRINITY_DN18274_c0_g1_i4	3.49155	2.51091	-1.01856	11.2476	5.69981	2.02589	0.0127607	0.130221	0.216373	0.598305	0.950604	0.902524
TRINITY_DN32425_c0_g1_i2	-0.717624	-0.272859	0.387545	1.64447	1.2082	1.30817	0.0127691	0.307494	0.160494	0.598361	1	0.823813
TRINITY_DN27851_c0_g1_i2	5.84583	7.69407	1.8054	57.5134	207.084	3.49526	0.0127795	2.01601e-05	0.019176	0.598513	0.00879884	0.372376
TRINITY_DN15218_c0_g1_i2	-0.906585	-0.317812	0.532747	1.8746	1.24644	1.44668	0.0127929	0.350693	0.116833	0.598806	1	0.755889
TRINITY_DN23574_c0_g2_i2	6.83811	6.55026	-0.346793	114.413	93.7186	1.27173	0.0128589	0.069364	0.877294	0.601555	0.7905	1
TRINITY_DN31268_c0_g1_i2	-0.914551	-0.365571	0.490346	1.88498	1.28839	1.40478	0.0128661	0.299853	0.171855	0.601555	1	0.845132
TRINITY_DN33014_c0_g4_i1	-1.0833	-0.120435	0.908955	2.11888	1.08706	1.87769	0.0128945	0.664217	0.0262408	0.602544	1	0.428087
TRINITY_DN42755_c0_g1_i1	1.74876	0.543453	-1.25537	3.36069	1.45746	2.38728	0.0129135	0.443683	0.0371748	0.603096	1	0.496417
TRINITY_DN21267_c0_g1_i1	-1.03502	-0.40087	0.581371	2.04915	1.3203	1.49627	0.0130031	0.107518	0.131415	0.60694	0.909206	0.787674
TRINITY_DN34447_c0_g1_i1	-3.29798	0.383665	3.63032	9.83537	1.30465	12.3832	0.013059	0.893618	0.0926325	0.607982	1	0.700828
TRINITY_DN33665_c0_g2_i6	-6.22089	2.41528	8.62375	74.589	5.33422	394.465	0.013065	0.139228	1.1557e-05	0.607982	0.975597	0.00309305
TRINITY_DN18613_c0_g1_i1	-6.22089	-1.0745	5.108	74.5889	2.10599	34.4873	0.0130672	0.570545	0.0957823	0.607982	1	0.70713
TRINITY_DN31635_c0_g1_i6	-6.22089	-0.951186	5.25672	74.5889	1.93346	38.2322	0.0130675	0.494538	0.0212872	0.607982	1	0.391197
TRINITY_DN25956_c0_g1_i2	-6.22089	-0.961031	5.23419	74.5889	1.9467	37.6398	0.0130683	0.494013	0.0206395	0.607982	1	0.385553
TRINITY_DN27518_c0_g1_i3	-6.22089	2.48554	8.68029	74.5889	5.60043	410.229	0.0130692	0.0209518	3.14191e-11	0.607982	0.505851	4.11784e-08
TRINITY_DN32533_c0_g1_i22	6.59614	4.41482	-2.23569	96.7468	21.3301	4.70987	0.0130786	0.218934	0.110873	0.608082	1	0.738673
TRINITY_DN22858_c0_g1_i5	-3.65433	-2.0756	1.54955	12.5911	4.21518	2.92726	0.0130945	0.111313	0.426266	0.608482	0.915408	1
TRINITY_DN1619_c0_g1_i1	-1.14281	-0.383766	0.704279	2.2081	1.30474	1.62933	0.0131117	0.212749	0.0967961	0.60894	1	0.71013
TRINITY_DN27631_c0_g1_i1	-0.973528	-0.315784	0.600387	1.96364	1.24469	1.51612	0.0131392	0.354091	0.105646	0.609879	1	0.733471
TRINITY_DN23454_c1_g1_i6	-0.745697	3.11039	3.78732	1.67678	8.63618	13.8069	0.0131679	0.00140876	4.37434e-06	0.610873	0.138043	0.00143327
TRINITY_DN35927_c0_g1_i1	-0.713973	-0.611313	0.038475	1.64032	1.52765	1.02703	0.0131854	0.0645281	0.903984	0.611346	0.768052	1
TRINITY_DN12728_c0_g1_i1	-0.636411	-0.342842	0.234165	1.55446	1.26825	1.17623	0.0132106	0.192149	0.367689	0.612173	1	0.998308
TRINITY_DN31895_c0_g1_i1	0.71753	0.0158324	-0.760417	1.64436	1.01103	1.69398	0.0132264	0.957117	0.00383128	0.61243	1	0.163609
TRINITY_DN14593_c0_g1_i1	1.00576	0.0741637	-0.992339	2.008	1.05275	1.98941	0.0132308	0.88266	0.00640421	0.61243	1	0.218103
TRINITY_DN4264_c0_g2_i1	-0.672945	-0.93636	-0.321726	1.59432	1.91369	1.24982	0.0132544	0.0006667	0.23903	0.612503	0.0885593	0.917434
TRINITY_DN46775_c0_g1_i1	-1.4827	-0.727963	0.698565	2.79472	1.6563	1.62289	0.0132547	0.133121	0.218102	0.612503	0.959166	0.902563
TRINITY_DN40871_c1_g1_i1	-0.652291	0.100668	0.695377	1.57166	1.07227	1.61931	0.0132594	0.666898	0.00510717	0.612503	1	0.191889
TRINITY_DN23170_c0_g2_i1	-3.41974	-0.1423	3.22338	10.7015	1.10366	9.33975	0.0132618	0.900658	0.0064667	0.612503	1	0.219135
TRINITY_DN8819_c0_g2_i1	-0.588504	-0.319803	0.210008	1.50369	1.24816	1.15669	0.0132943	0.154319	0.355682	0.613663	1	0.989361
TRINITY_DN32796_c0_g1_i1	0.932958	0.667512	-0.325893	1.90919	1.58833	1.25344	0.0133105	0.0798461	0.278209	0.614071	0.829106	0.960714
TRINITY_DN33583_c0_g2_i8	-0.820823	-1.26185	-0.497608	1.76641	2.39803	1.41187	0.0133348	0.043571	0.380937	0.614855	0.668803	1
TRINITY_DN34145_c0_g2_i1	0.882825	0.218089	-0.721167	1.84398	1.16319	1.64852	0.0133552	0.528248	0.0255419	0.615455	1	0.422406
TRINITY_DN2731_c0_g2_i1	5.75	4.28798	-1.48142	53.8173	19.5349	2.79224	0.0133812	0.288701	0.21927	0.615762	1	0.902825
TRINITY_DN30015_c0_g1_i10	5.75	5.65601	-0.17063	53.8173	50.4229	1.12555	0.0133839	0.0730743	0.949487	0.615762	0.805375	1
TRINITY_DN28538_c0_g1_i2	-1.32442	-0.201413	1.06707	2.50432	1.14982	2.09517	0.0133876	0.619561	0.0319984	0.615762	1	0.466583
TRINITY_DN9927_c0_g2_i1	3.76622	1.75458	-2.10836	13.6065	3.37427	4.31202	0.0133914	0.487977	0.0728714	0.615762	1	0.643078
TRINITY_DN35656_c0_g1_i11	5.92274	3.11951	-2.84472	60.663	8.69094	7.18369	0.0134031	0.503142	0.0150776	0.615958	1	0.33428
TRINITY_DN55636_c0_g1_i1	-0.584872	-0.451188	0.0733635	1.49991	1.36717	1.05217	0.0134116	0.0486033	0.749957	0.616012	0.694681	1
TRINITY_DN20201_c0_g1_i1	-0.900808	-0.0858074	0.754064	1.86711	1.06128	1.68654	0.0134205	0.80316	0.0254064	0.616079	1	0.421166
TRINITY_DN32910_c0_g1_i2	3.17589	2.04365	-1.19088	9.03731	4.12286	2.28292	0.0134358	0.43562	0.408073	0.616229	1	1
TRINITY_DN35220_c1_g1_i2	1.27811	-0.268645	-1.60733	2.42521	1.20468	3.04687	0.0134405	0.641521	0.000498332	0.616229	1	0.0496783
TRINITY_DN2670_c0_g1_i1	-0.583849	-0.389224	0.136381	1.49884	1.30969	1.09914	0.0134459	0.0828696	0.547756	0.616229	0.841262	1
TRINITY_DN45939_c1_g1_i1	-0.596738	-0.345023	0.191008	1.51229	1.27017	1.14156	0.0134551	0.160199	0.418649	0.616312	1	1
TRINITY_DN31050_c0_g1_i2	-2.57016	-0.542616	1.96356	5.93876	1.45661	3.90023	0.0134732	0.409752	0.0341684	0.616801	1	0.480376
TRINITY_DN29544_c0_g2_i3	6.83774	8.21447	1.35008	114.384	297.032	2.54926	0.0134843	8.41633e-07	0.168361	0.61697	0.000787853	0.839138
TRINITY_DN27138_c0_g1_i1	0.683048	0.143125	-0.600437	1.60553	1.10429	1.51618	0.0135293	0.636099	0.0267251	0.618693	1	0.432347
TRINITY_DN35707_c0_g1_i10	-1.72872	-3.17847	-1.5357	3.31434	9.05349	2.8993	0.0135385	0.0102886	0.238039	0.618775	0.379302	0.915919
TRINITY_DN34186_c0_g2_i11	-1.41493	-0.449009	0.910965	2.66646	1.3651	1.8803	0.0135781	0.380201	0.108045	0.619979	1	0.735811
TRINITY_DN19949_c0_g1_i1	-0.664022	-0.733947	-0.126583	1.58449	1.66318	1.0917	0.0135868	0.00363757	0.617311	0.619979	0.227641	1
TRINITY_DN32261_c0_g1_i2	-0.830874	-0.511303	0.258384	1.77876	1.42534	1.19614	0.0135872	0.132598	0.453893	0.619979	0.957769	1
TRINITY_DN29461_c0_g1_i2	0.672487	-0.484671	-1.21515	1.59382	1.39927	2.32165	0.0136051	0.08581	4.09151e-06	0.620175	0.844393	0.00135555
TRINITY_DN13026_c0_g1_i2	-1.51136	-0.148723	1.3124	2.8508	1.10859	2.48354	0.0136169	0.733698	0.0173709	0.620175	1	0.35581
TRINITY_DN27312_c0_g2_i1	-2.97428	-0.530608	2.37212	7.85865	1.44454	5.17701	0.0136208	0.670852	0.0568102	0.620175	1	0.587602
TRINITY_DN28554_c0_g1_i3	-0.822775	-0.434998	0.334387	1.76881	1.35191	1.26084	0.0136212	0.12372	0.297233	0.620175	0.940978	0.960714
TRINITY_DN20515_c0_g1_i2	2.641	2.29651	-0.413325	6.23764	4.91268	1.33175	0.013634	0.0625442	0.524924	0.620417	0.760906	1
TRINITY_DN33356_c0_g1_i1	0.650529	0.362948	-0.345411	1.56974	1.28605	1.27051	0.0137011	0.135321	0.141858	0.623132	0.965079	0.806666
TRINITY_DN33171_c0_g1_i6	6.84215	7.95415	1.08012	114.734	247.992	2.11421	0.0137117	0.00192732	0.436697	0.623274	0.164395	1
TRINITY_DN33415_c0_g1_i1	1.63324	1.55853	-0.133798	3.10209	2.94553	1.09718	0.0137478	0.0140938	0.781991	0.623826	0.429513	1
TRINITY_DN29600_c0_g1_i3	-5.85445	-5.83633	0	57.8582	57.1362	0	0.0137569	0.0106243	0	0.623826	0.38592	0
TRINITY_DN34846_c0_g1_i1	6.76621	7.3039	0.472216	108.851	158.013	1.38724	0.0137576	0.00564328	0.738826	0.623826	0.28165	1
TRINITY_DN26301_c0_g1_i2	-0.7926	-1.26952	-0.535862	1.73219	2.41082	1.44981	0.0137618	0.00127549	0.152316	0.623826	0.129347	0.810314
TRINITY_DN35940_c0_g1_i1	-0.640761	-0.817652	-0.234877	1.55915	1.76253	1.17681	0.0137654	0.00101081	0.300611	0.623826	0.114214	0.960714
TRINITY_DN21827_c0_g1_i1	-1.75628	-1.33086	0.376304	3.37826	2.51552	1.29801	0.0137687	0.0475062	0.619372	0.623826	0.691251	1
TRINITY_DN12605_c0_g1_i1	-0.620291	0.177007	0.739564	1.53718	1.13054	1.66967	0.0137763	0.438574	0.0018764	0.62383	1	0.110962
TRINITY_DN28702_c0_g1_i5	6.82165	5.75982	-1.06977	113.115	54.1851	2.09911	0.0138019	0.0981619	0.503216	0.624486	0.877012	1
TRINITY_DN35914_c0_g1_i6	-1.67712	-0.594564	1.02318	3.19789	1.51002	2.0324	0.0138058	0.336473	0.110147	0.624486	1	0.737396
TRINITY_DN30029_c0_g1_i1	-1.71163	-0.527325	1.13286	3.27531	1.44125	2.19293	0.0138168	0.345206	0.0745942	0.624647	1	0.649344
TRINITY_DN25615_c0_g1_i2	-3.48236	-0.329463	3.1156	11.1762	1.25655	8.6674	0.0138394	0.745853	0.0184701	0.625331	1	0.366531
TRINITY_DN8723_c0_g1_i1	0.898532	-0.418157	-1.37265	1.86417	1.33622	2.58946	0.0138905	0.274538	5.73262e-05	0.6273	1	0.0110585
TRINITY_DN35702_c0_g1_i1	-1.37589	0.0938362	1.41627	2.59528	1.0672	2.66895	0.0139038	0.768357	0.00690748	0.62756	1	0.226994
TRINITY_DN33427_c0_g1_i1	-1.34617	-0.720165	0.573961	2.54236	1.64737	1.4886	0.0139193	0.0582483	0.283895	0.627837	0.740495	0.960714
TRINITY_DN35823_c0_g2_i1	0.619894	-0.732699	-1.4118	1.53676	1.66174	2.66069	0.013925	0.00336087	1.20772e-08	0.627837	0.21835	9.12157e-06
TRINITY_DN30624_c0_g1_i2	6.04887	6.16088	0.0755949	66.205	71.5498	1.0538	0.0139356	0.00455061	0.949325	0.627977	0.2505	1
TRINITY_DN5419_c0_g2_i1	-0.785462	-0.361153	0.36911	1.72364	1.28445	1.29156	0.0139571	0.203146	0.227515	0.628447	1	0.911331
TRINITY_DN62743_c0_g1_i1	-2.29947	-1.035	1.21299	4.92277	2.04912	2.31818	0.0139611	0.207552	0.185471	0.628447	1	0.867318
TRINITY_DN35542_c0_g1_i2	0.827752	0.0521079	-0.837547	1.77492	1.03678	1.78701	0.0140625	0.892488	0.00756903	0.631998	1	0.239123
TRINITY_DN35797_c0_g1_i1	1.32105	1.04436	-0.338724	2.49847	2.06245	1.26464	0.0140632	0.0608601	0.37945	0.631998	0.750829	1
TRINITY_DN22472_c0_g1_i4	-6.26011	0.09372	6.29291	76.6442	1.06712	78.4068	0.0140685	1	0.0168682	0.631998	1	0.351653
TRINITY_DN25350_c1_g1_i1	6.72135	8.05699	1.32351	105.518	266.314	2.50274	0.0140703	0.00227713	0.357896	0.631998	0.180477	0.9919
TRINITY_DN41258_c0_g1_i1	-1.12435	-0.643262	0.425835	2.18003	1.56186	1.34335	0.0141006	0.0633281	0.342833	0.632335	0.762385	0.973232
TRINITY_DN25992_c0_g1_i2	1.01243	-0.0908916	-1.16948	2.01731	1.06503	2.2493	0.0141022	0.85071	0.00448835	0.632335	1	0.179672
TRINITY_DN34242_c0_g1_i1	6.1043	4.0924	-2.08413	68.7984	17.0583	4.2402	0.0141029	0.257483	0.11985	0.632335	1	0.76168
TRINITY_DN34772_c0_g1_i5	1.05339	-0.0313432	-1.14638	2.07541	1.02196	2.21358	0.0141082	0.937928	0.00191887	0.632335	1	0.112214
TRINITY_DN41523_c0_g1_i1	-0.833402	-0.465629	0.310544	1.78188	1.38092	1.24018	0.0141295	0.158227	0.350233	0.63295	1	0.982389
TRINITY_DN26477_c0_g1_i1	0.92088	0.334661	-0.644079	1.89327	1.26108	1.56274	0.0141439	0.368471	0.04848	0.633044	1	0.551104
TRINITY_DN33275_c1_g1_i2	-1.70096	-1.07837	0.578544	3.25118	2.11165	1.49334	0.014152	0.120511	0.460583	0.633044	0.938228	1
TRINITY_DN18026_c0_g1_i1	1.92219	-1.10124	-3.06391	3.78997	2.14539	8.36236	0.0141543	0.291395	4.23981e-05	0.633044	1	0.00868644
TRINITY_DN32362_c0_g1_i2	-1.47777	-0.732029	0.689469	2.78517	1.66097	1.61269	0.0141728	0.450522	0.494182	0.633529	1	1
TRINITY_DN18219_c0_g1_i1	-3.24946	-7.54798	-4.33114	9.51008	187.14	20.1282	0.0142022	4.60486e-06	0.172208	0.634481	0.00291791	0.845132
TRINITY_DN20230_c0_g1_i1	-1.24879	-0.335502	0.858422	2.37642	1.26182	1.81305	0.0142193	0.452001	0.0774948	0.634481	1	0.658765
TRINITY_DN53156_c0_g1_i1	6.7904	0	-6.81533	110.692	0	112.621	0.0142414	0	0.00179739	0.634481	0	0.108381
TRINITY_DN22717_c0_g1_i1	-5.21688	-2.26978	3.09901	37.1909	4.82251	8.56833	0.0142443	0.196958	0.458612	0.634481	1	1
TRINITY_DN15744_c0_g1_i1	-5.21688	-2.57979	2.62551	37.1909	5.97853	6.17101	0.0142493	0.0831668	0.520899	0.634481	0.842284	1
TRINITY_DN31153_c0_g3_i1	-5.21688	-0.936735	4.25905	37.1909	1.91419	19.147	0.0142507	0.5318	0.0873388	0.634481	1	0.685482
TRINITY_DN24463_c0_g2_i2	-5.21688	1.20813	6.38613	37.1909	2.31038	83.6404	0.0142528	0.323859	0.000217454	0.634481	1	0.0284999
TRINITY_DN29125_c0_g1_i1	-5.21688	-0.298055	4.86111	37.1909	1.22949	29.063	0.0142549	0.870081	0.0495462	0.634481	1	0.556313
TRINITY_DN35949_c0_g1_i1	-4.56784	-7.64618	-3.10517	23.7168	200.323	8.60496	0.0143133	0.000818497	0.440303	0.636656	0.101035	1
TRINITY_DN35235_c0_g1_i4	-3.21986	0.365022	3.52621	9.31695	1.2879	11.5211	0.0143191	0.789461	0.0218403	0.636656	1	0.39636
TRINITY_DN28814_c0_g1_i1	-1.70057	-0.339733	1.31334	3.25029	1.26552	2.48517	0.0143346	0.29116	0.0450347	0.636719	1	0.534076
TRINITY_DN35953_c0_g2_i2	-0.946073	-0.712065	0.17404	1.92662	1.63815	1.12821	0.0143417	0.0647893	0.626003	0.636719	0.769528	1
TRINITY_DN27423_c0_g2_i1	-0.774046	-0.519524	0.189143	1.71006	1.43348	1.14009	0.0143434	0.112656	0.568948	0.636719	0.918793	1
TRINITY_DN32195_c0_g1_i7	6.85847	5.03585	-1.88556	116.039	32.8051	3.69495	0.0143696	0.181429	0.247113	0.637546	1	0.93153
TRINITY_DN63402_c0_g1_i1	3.97383	4.49631	0.484478	15.7124	22.5696	1.39908	0.0143971	0.00579579	0.59566	0.638423	0.285104	1
TRINITY_DN35665_c0_g1_i4	-4.00645	-3.2302	0.695363	16.0716	9.384	1.61929	0.0144276	0.0294764	1	0.639135	0.580031	1
TRINITY_DN25009_c0_g1_i1	-0.837547	-0.514734	0.267788	1.78701	1.42873	1.20396	0.0144285	0.0576895	0.412342	0.639135	0.736896	1
TRINITY_DN36154_c0_g1_i1	2.16951	1.98094	-0.248614	4.49872	3.9475	1.18807	0.0144751	0.0229586	0.698954	0.640859	0.523439	1
TRINITY_DN26319_c0_g1_i2	-1.2104	-0.738617	0.415966	2.31401	1.66858	1.33419	0.0145069	0.0473892	0.387589	0.641929	0.690959	1
TRINITY_DN22367_c0_g2_i3	-1.0645	0.13377	1.13979	2.09145	1.09716	2.2035	0.0145534	0.69956	0.00632176	0.643646	1	0.216114
TRINITY_DN34097_c0_g2_i5	-2.23053	-2.46451	-0.255909	4.69307	5.51941	1.19409	0.0146803	0.0224416	0.923051	0.64878	0.518149	1
TRINITY_DN6809_c0_g2_i1	-3.94551	-1.64184	2.27627	15.407	3.12063	4.84424	0.0146863	0.271158	0.285598	0.64878	1	0.960714
TRINITY_DN35825_c0_g1_i11	5.7793	7.25223	1.4412	54.9215	152.453	2.71546	0.0146929	0.000226059	0.0913424	0.64878	0.0432331	0.698226
TRINITY_DN29967_c0_g1_i2	6.02235	4.76568	-1.28412	64.9993	27.2027	2.43534	0.0147048	0.123242	0.254504	0.648964	0.940978	0.944638
TRINITY_DN31209_c1_g1_i5	6.7278	6.98759	0.195674	105.991	126.903	1.14526	0.0147434	0.00885961	0.899178	0.650322	0.350225	1
TRINITY_DN30525_c1_g2_i1	-1.50637	-2.16942	-0.723612	2.84094	4.49843	1.65131	0.0147806	0.000694631	0.30354	0.651622	0.0911017	0.960714
TRINITY_DN47859_c0_g1_i1	-2.61677	-1.4614	1.11542	6.13375	2.75376	2.16658	0.0147897	0.011833	0.290488	0.651677	0.400688	0.960714
TRINITY_DN40023_c0_g1_i1	-5.30738	-0.919888	4.37304	39.5987	1.89197	20.7213	0.0148051	0.546362	0.0854869	0.652011	1	0.680141
TRINITY_DN60612_c1_g1_i1	-0.70932	-0.222804	0.427827	1.63503	1.167	1.34521	0.0148293	0.331403	0.114391	0.652402	1	0.748623
TRINITY_DN31136_c0_g1_i7	-5.42365	-1.23768	4.13114	42.922	2.35818	17.5226	0.0148296	0.337477	0.0631435	0.652402	1	0.610144
TRINITY_DN32903_c1_g5_i3	6.92689	0	-6.93932	121.675	0	122.728	0.0148727	0	0.00187119	0.653324	0	0.110807
TRINITY_DN54670_c0_g1_i1	-5.24105	-1.2551	3.94872	37.8194	2.38683	15.4412	0.0148799	0.401659	0.236084	0.653324	1	0.913548
TRINITY_DN29600_c0_g1_i4	-5.24106	-0.720285	4.4648	37.8194	1.64751	22.0821	0.0148827	0.527855	0.077684	0.653324	1	0.658957
TRINITY_DN31207_c0_g1_i1	-5.24106	-5.22389	0	37.8195	37.3721	0	0.0148892	0.0114264	0	0.653324	0.396519	0
TRINITY_DN32850_c0_g1_i1	-1.40779	-0.187682	1.16724	2.65331	1.13893	2.24582	0.0148898	0.568611	0.032817	0.653324	1	0.471858
TRINITY_DN33543_c0_g1_i2	-3.1878	-1.99092	1.18218	9.11218	3.9749	2.26919	0.0149101	0.166115	0.606484	0.653872	1	1
TRINITY_DN20975_c0_g1_i1	4.284	-0.234253	-4.61192	19.481	1.1763	24.4527	0.0149327	1	0.00430659	0.654519	1	0.174619
TRINITY_DN27758_c1_g1_i1	0.791336	-0.298659	-1.13896	1.73068	1.23	2.20221	0.014943	0.404557	0.000791338	0.654627	1	0.065362
TRINITY_DN29099_c2_g1_i2	-1.53217	-0.996069	0.492315	2.89221	1.99456	1.4067	0.0149883	0.0191936	0.435894	0.655921	0.48721	1
TRINITY_DN25606_c1_g1_i2	1.6948	2.71681	0.969407	3.23732	6.57417	1.95804	0.0149937	1.40497e-05	0.0383483	0.655921	0.00660365	0.50289
TRINITY_DN26890_c0_g1_i1	1.74164	-1.07797	-2.87805	3.34415	2.11106	7.35157	0.0149961	0.44325	0.00972937	0.655921	1	0.269453
TRINITY_DN27171_c0_g1_i4	-0.599235	-0.410722	0.129963	1.51491	1.32935	1.09427	0.0150059	0.0802449	0.584394	0.656006	0.830346	1
TRINITY_DN13231_c0_g1_i2	0.948563	1.11038	0.107521	1.92995	2.15902	1.07738	0.0150221	0.00157652	0.7563	0.656368	0.147745	1
TRINITY_DN32311_c0_g1_i1	-3.47216	0.211304	3.63866	11.0975	1.15773	12.4551	0.0150378	0.837145	0.00272591	0.65649	1	0.137486
TRINITY_DN31610_c0_g1_i3	6.77964	4.62106	-2.16427	109.869	24.6081	4.48238	0.0150406	0.255781	0.17245	0.65649	1	0.845416
TRINITY_DN34137_c0_g1_i4	-1.55227	-0.164519	1.32799	2.93278	1.12079	2.51053	0.0150659	0.758988	0.0440756	0.657123	1	0.530395
TRINITY_DN33693_c0_g1_i2	6.71215	4.28798	-2.47906	104.847	19.5349	5.57534	0.0150709	0.288706	0.109494	0.657123	1	0.73655
TRINITY_DN33183_c0_g1_i1	5.90343	3.97017	-1.97217	59.8561	15.6726	3.92359	0.0150836	0.296944	0.137239	0.657292	1	0.799225
TRINITY_DN35471_c0_g2_i3	4.78174	2.29053	-2.58431	27.5073	4.89237	5.99729	0.0150905	0.400504	0.10726	0.657292	1	0.735098
TRINITY_DN10893_c0_g2_i1	5.77613	4.34938	-1.4447	54.8011	20.3842	2.72207	0.0151429	0.171133	0.203164	0.659229	1	0.888294
TRINITY_DN35396_c0_g1_i10	6.8304	7.59353	0.729643	113.804	193.144	1.65823	0.0151725	4.86722e-05	0.511222	0.659542	0.0157713	1
TRINITY_DN29099_c2_g1_i6	-1.96365	-1.1227	0.789226	3.90047	2.17754	1.72815	0.0151918	0.0916972	0.362762	0.659542	0.860575	0.997008
TRINITY_DN31296_c0_g2_i1	-0.8817	0.182508	1.00756	1.84254	1.13485	2.01051	0.0152078	0.597511	0.00310174	0.659542	1	0.146338
TRINITY_DN19212_c0_g1_i5	-6.14824	-6.13331	0	70.9257	70.1957	0	0.0152204	0.0119078	0	0.659542	0.400717	0
TRINITY_DN36048_c12_g12_i4	-6.14824	-4.29942	0	70.9257	19.6904	0	0.0152211	0.0318729	0	0.659542	0.59959	0
TRINITY_DN34399_c2_g1_i1	-1.5799	-0.418569	1.10474	2.98949	1.3366	2.1506	0.0152243	0.375334	0.0819721	0.659542	1	0.670785
TRINITY_DN32893_c0_g1_i4	-6.14824	-1.69103	4.41128	70.9257	3.22887	21.2779	0.0152247	0.325245	0.102119	0.659542	1	0.725957
TRINITY_DN8966_c0_g1_i1	4.06473	1.73726	-2.41149	16.7342	3.33401	5.32025	0.0152252	0.543857	0.0456485	0.659542	1	0.537068
TRINITY_DN22651_c0_g1_i3	-6.14823	-2.45133	3.63037	70.9256	5.46921	12.3837	0.0152282	0.163914	0.308354	0.659542	1	0.960714
TRINITY_DN25406_c0_g1_i4	-6.14823	-1.98412	4.1521	70.9256	3.95622	17.7789	0.0152291	0.266754	0.186189	0.659542	1	0.867909
TRINITY_DN22763_c0_g1_i1	-1.02098	-0.0544223	0.911924	2.02929	1.03844	1.88155	0.0153155	0.852594	0.0206066	0.662937	1	0.385334
TRINITY_DN35669_c3_g1_i2	2.03176	0.792932	-1.28406	4.08902	1.73259	2.43523	0.0153416	0.172512	0.0729994	0.663411	1	0.643443
TRINITY_DN35195_c1_g1_i5	-0.983436	-0.775856	0.153111	1.97717	1.71221	1.11196	0.0153423	0.0749555	0.744908	0.663411	0.811165	1
TRINITY_DN20774_c0_g1_i1	5.80159	2.65322	-3.21663	55.7768	6.29069	9.29612	0.0153977	0.732345	0.0170909	0.664709	1	0.353323
TRINITY_DN27856_c1_g1_i1	0.730218	0.0487792	-0.74165	1.65889	1.03439	1.67209	0.0154069	0.87932	0.00832822	0.664709	1	0.25203
TRINITY_DN28782_c0_g1_i2	5.78267	6.13804	0.321277	55.0498	70.4259	1.24944	0.0154177	0.00466419	0.762145	0.664709	0.254357	1
TRINITY_DN60924_c0_g1_i1	-1.03519	-0.277974	0.701544	2.04939	1.21249	1.62624	0.0154396	0.419338	0.0761405	0.664709	1	0.654431
TRINITY_DN35633_c0_g1_i3	-6.07184	2.16333	8.22078	67.2677	4.47948	298.334	0.0154404	0.0550009	1.89386e-09	0.664709	0.722734	1.57743e-06
TRINITY_DN35936_c0_g3_i21	1.12693	0.105629	-1.06807	2.18393	1.07596	2.09662	0.0154421	0.864023	0.0163497	0.664709	1	0.34617
TRINITY_DN28609_c0_g1_i1	-6.07184	-1.94302	4.06547	67.2677	3.84511	16.7429	0.0154453	0.288051	0.183253	0.664709	1	0.862528
TRINITY_DN29746_c0_g1_i1	-6.07184	-0.91951	5.09928	67.2676	1.89147	34.2796	0.01545	0.555479	0.0460656	0.664709	1	0.539077
TRINITY_DN34716_c0_g1_i11	-6.07184	-0.924654	5.10799	67.2676	1.89823	34.4871	0.015451	0.63407	0.095765	0.664709	1	0.70713
TRINITY_DN50984_c1_g1_i1	0.777555	-0.0845269	-0.922749	1.71422	1.06034	1.89572	0.015452	0.775684	0.00213703	0.664709	1	0.118541
TRINITY_DN30836_c0_g1_i1	-0.697947	-0.011608	0.629122	1.6222	1.00808	1.54662	0.0154686	0.955978	0.0222435	0.66487	1	0.39887
TRINITY_DN30826_c1_g2_i4	-0.798248	-1.03746	-0.300461	1.73899	2.0526	1.23154	0.0154717	0.00239739	0.309158	0.66487	0.184282	0.960714
TRINITY_DN33158_c0_g1_i3	-1.60987	-0.221752	1.33102	3.05223	1.16615	2.51581	0.01548	0.649885	0.0235645	0.664883	1	0.409059
TRINITY_DN34923_c0_g2_i3	6.68142	4.70572	-2.05332	102.638	26.0953	4.15059	0.0155271	0.269858	0.257937	0.665935	1	0.946988
TRINITY_DN33086_c0_g1_i5	-0.781178	-0.306383	0.419344	1.71853	1.2366	1.33732	0.015536	0.272893	0.176841	0.665935	1	0.855244
TRINITY_DN64807_c0_g1_i1	-3.32939	-2.81068	0.450751	10.0519	7.01615	1.36675	0.0155361	0.0327476	0.905268	0.665935	0.604784	1
TRINITY_DN32229_c0_g2_i1	0.91284	0.434705	-0.540326	1.88275	1.35163	1.4543	0.0155375	0.303501	0.112028	0.665935	1	0.742188
TRINITY_DN31858_c0_g4_i1	-0.750124	-0.746973	-0.055116	1.68194	1.67827	1.03894	0.0155488	0.0228917	0.874037	0.665935	0.523017	1
TRINITY_DN30938_c0_g6_i1	0.640194	-0.0792094	-0.780051	1.55854	1.05644	1.71719	0.0155524	0.759567	0.00314718	0.665935	1	0.147623
TRINITY_DN27570_c0_g1_i1	-2.79005	0.0191172	2.75313	6.91654	1.01334	6.74179	0.0155995	1	0.00760846	0.66701	1	0.240114
TRINITY_DN11469_c0_g1_i1	-5.1923	-0.818239	4.33659	36.5626	1.76325	20.2043	0.0156068	0.630201	0.0854162	0.66701	1	0.680141
TRINITY_DN39833_c0_g1_i1	-5.1923	0.337159	5.49875	36.5626	1.26327	45.2155	0.0156073	0.877519	0.0152421	0.66701	1	0.335908
TRINITY_DN43937_c0_g1_i1	-5.19229	-1.94899	3.21557	36.5625	3.86104	9.28929	0.0156095	0.158082	0.310467	0.66701	1	0.960714
TRINITY_DN30537_c0_g1_i2	-0.816579	-0.158843	0.601052	1.76123	1.11639	1.51682	0.0156185	0.611211	0.03319	0.667055	1	0.473439
TRINITY_DN33712_c0_g1_i1	0.658917	-0.0610802	-0.776756	1.5789	1.04325	1.71327	0.015645	0.81281	0.00197859	0.667844	1	0.113915
TRINITY_DN23668_c0_g1_i2	-1.76367	-0.619716	1.08218	3.39561	1.53657	2.11723	0.0156698	0.315157	0.108419	0.668561	1	0.735811
TRINITY_DN29995_c0_g1_i2	6.25156	7.14242	0.855617	76.1918	141.28	1.80953	0.0156904	0.000230644	0.371334	0.669097	0.043651	1
TRINITY_DN1817_c0_g1_i1	-2.84503	-0.968967	1.8174	7.18523	1.95744	3.52445	0.0157047	0.311406	0.119035	0.669365	1	0.759714
TRINITY_DN23481_c0_g1_i2	0.779737	-0.153676	-0.994879	1.71682	1.1124	1.99291	0.0157807	0.669121	0.00244799	0.672007	1	0.129046
TRINITY_DN21225_c0_g1_i1	2.79954	3.19562	0.331373	6.96218	9.16171	1.25821	0.0157861	0.00432532	0.587485	0.672007	0.246926	1
TRINITY_DN35592_c0_g1_i1	0.668162	0.124479	-0.602084	1.58905	1.09011	1.51791	0.015794	0.623994	0.0159245	0.672007	1	0.34193
TRINITY_DN34301_c0_g1_i4	1.24085	1.71952	0.421204	2.36337	3.29326	1.33904	0.015799	0.00026163	0.256022	0.672007	0.0480276	0.946988
TRINITY_DN24917_c0_g1_i2	5.76967	4.11157	-1.67642	54.5563	17.2864	3.19634	0.0158441	0.341585	0.220065	0.673316	1	0.903727
TRINITY_DN2395_c0_g2_i1	5.76967	5.29099	-0.565484	54.5563	39.1513	1.47988	0.0158459	0.0895706	0.713333	0.673316	0.852022	1
TRINITY_DN34369_c0_g1_i2	-0.869539	-0.105335	0.706886	1.82708	1.07574	1.63228	0.0158648	0.690911	0.0353692	0.673776	1	0.486742
TRINITY_DN31998_c0_g1_i5	-1.15292	-0.0317441	1.07178	2.22364	1.02225	2.10202	0.0158881	0.908977	0.0191466	0.674266	1	0.37218
TRINITY_DN27081_c0_g1_i2	-1.32716	-0.870033	0.41043	2.50909	1.8277	1.32908	0.0158925	0.0974321	0.47825	0.674266	0.876325	1
TRINITY_DN33032_c0_g1_i4	-3.54675	0.3256	3.83129	11.6863	1.25319	14.2342	0.0159218	0.789296	0.00390486	0.675165	1	0.165512
TRINITY_DN34650_c0_g1_i2	0.663346	-0.0640451	-0.786762	1.58375	1.04539	1.7252	0.0159369	0.79375	0.00141217	0.675287	1	0.0938522
TRINITY_DN35669_c2_g1_i1	-1.07825	-0.126204	0.901747	2.11148	1.09142	1.86833	0.0159418	0.633449	0.0339725	0.675287	1	0.478946
TRINITY_DN35928_c0_g1_i1	8.24516	0	-8.27385	303.418	0	309.512	0.015973	0	0.00210297	0.675287	0	0.117689
TRINITY_DN18986_c0_g1_i1	-1.78088	-1.01816	0.698089	3.43637	2.02533	1.62235	0.015986	0.243856	0.439828	0.675287	1	1
TRINITY_DN30961_c0_g1_i1	-0.875821	-0.385183	0.433148	1.83505	1.30603	1.35018	0.0159946	0.221309	0.210609	0.675287	1	0.895898
TRINITY_DN33329_c0_g1_i1	-3.74153	-1.48154	2.2194	13.3756	2.79247	4.657	0.0160095	0.203454	0.121802	0.675287	1	0.766843
TRINITY_DN33354_c0_g1_i3	-6.17338	0.104656	6.22497	72.1727	1.07524	74.8003	0.0160452	1	0.000425974	0.675287	1	0.0449807
TRINITY_DN27468_c0_g1_i1	-4.62649	-7.31969	-2.73234	24.7009	159.752	6.64532	0.0160479	0.00188838	0.615004	0.675287	0.162514	1
TRINITY_DN28218_c0_g1_i5	-6.17338	-6.15547	0	72.1727	71.2822	0	0.0160499	0.0136024	0	0.675287	0.425293	0
TRINITY_DN32227_c0_g1_i3	-6.17338	-6.15547	0	72.1728	71.2821	0	0.0160535	0.0135993	0	0.675287	0.425293	0
TRINITY_DN19279_c0_g1_i1	3.34088	1.91447	-1.46774	10.1323	3.76976	2.76588	0.0160542	0.277863	0.0801718	0.675287	1	0.665587
TRINITY_DN33239_c0_g1_i2	-6.17338	-0.740022	5.43325	72.1728	1.6702	43.2086	0.016055	0.666117	0.049098	0.675287	1	0.554154
TRINITY_DN32544_c0_g1_i1	-6.17338	-1.13244	4.98416	72.1728	2.19229	31.6506	0.016055	0.477477	0.0500818	0.675287	1	0.558781
TRINITY_DN33264_c0_g1_i2	-6.17338	-1.84481	4.30064	72.1728	3.59206	19.707	0.0160603	0.220106	0.0808396	0.675287	1	0.667195
TRINITY_DN33797_c0_g2_i10	-6.17339	-6.15547	0	72.1729	71.2821	0	0.0160652	0.0135991	0	0.675287	0.425293	0
TRINITY_DN31224_c0_g1_i2	1.17754	1.43534	0.206993	2.2619	2.70445	1.15428	0.0160658	0.00188063	0.600195	0.675287	0.162371	1
TRINITY_DN33187_c0_g1_i11	-1.53825	-1.20872	0.27441	2.90442	2.31133	1.2095	0.0160694	0.0198956	0.661632	0.675287	0.498235	1
TRINITY_DN27920_c0_g1_i2	-6.17339	-6.15547	0	72.1729	71.2821	0	0.0160703	0.0135999	0	0.675287	0.425293	0
TRINITY_DN6449_c0_g1_i1	-1.20858	-0.233596	0.914076	2.3111	1.17576	1.88436	0.0160826	0.589626	0.0491278	0.675325	1	0.554154
TRINITY_DN33417_c0_g1_i1	-1.19127	-0.91705	0.216736	2.28354	1.88825	1.1621	0.0160875	0.017546	0.651511	0.675325	0.470579	1
TRINITY_DN32143_c3_g3_i3	-1.35737	-0.366051	0.935382	2.56217	1.28882	1.9124	0.0161459	0.419785	0.09909	0.677437	1	0.719145
TRINITY_DN8822_c0_g1_i1	0.802678	-0.00552297	-0.869249	1.74434	1.00384	1.82671	0.0161795	0.977714	0.00678699	0.678431	1	0.225197
TRINITY_DN19004_c0_g1_i3	-0.849776	-0.0483286	0.749515	1.80222	1.03407	1.68123	0.0161895	0.841783	0.0248846	0.678431	1	0.417659
TRINITY_DN11592_c0_g2_i1	5.69933	4.14738	-1.53271	51.9601	17.7209	2.89329	0.0162031	0.340168	0.244034	0.678431	1	0.925677
TRINITY_DN28908_c0_g1_i1	5.69933	3.67604	-2.02599	51.9601	12.782	4.0727	0.016205	0.498667	0.109707	0.678431	1	0.73655
TRINITY_DN35487_c0_g2_i3	-2.1691	-0.13832	1.97138	4.49741	1.10062	3.92143	0.0162102	0.841564	0.011287	0.678431	1	0.291918
TRINITY_DN28356_c0_g1_i1	-0.648287	-0.522242	0.0710981	1.56731	1.43619	1.05052	0.0162286	0.028499	0.779588	0.678859	0.573576	1
TRINITY_DN34823_c0_g9_i1	-1.08288	-1.03658	-0.0157136	2.11826	2.05137	1.01095	0.0162443	0.0442982	0.982709	0.679175	0.671357	1
TRINITY_DN29674_c0_g1_i1	-0.651437	-0.708525	-0.118426	1.57073	1.63413	1.08555	0.0162588	0.00375652	0.652859	0.679442	0.230414	1
TRINITY_DN35790_c0_g2_i6	-1.75004	0.172296	1.88498	3.36367	1.12685	3.69349	0.016285	0.927673	0.0895252	0.680194	1	0.693194
TRINITY_DN34484_c0_g1_i3	-1.95595	-1.05247	0.844771	3.87972	2.07408	1.79598	0.0163292	0.0933544	0.295935	0.681698	0.867144	0.960714
TRINITY_DN28364_c0_g1_i1	6.68932	0	-6.70574	103.201	0	104.383	0.0163427	0	0.00208109	0.681922	0	0.116967
[truncated: 90,757 more rows]

## Sheet: Table S4
Seq. Name	Seq.Description	Seq. Length	#Hits	min. eValue	mean Similarity	#GOs	GOs	Enzyme Codes	GOs_ID	score	hitName	ACC
TRINITY_DN51809_c0_g1_i1	-dihydro-8-oxoguanine triphosphatase	202	1	1.34327	0.54	3	P:DNA repair; F:hydrolase activity; F:8-oxo-7,8-dihydroguanosine triphosphate pyrophosphatase activity		P:GO:0006281; F:GO:0016787; F:GO:0008413	35.8094	gi|494489159|ref|WP_007278630.1|"7,8-dihydro-8-oxoguanine triphosphatase" [Lentisphaera araneosa]	WP_007278630.1,EDM27672.1
TRINITY_DN39848_c0_g1_i1	(-)-trans-carveol dehydrogenase	317	1	0.101218	0.5	0	-		-
TRINITY_DN28310_c0_g1_i2	(+)-neomenthol dehydrogenase-like isoform x1	282	1	2.65551	0.43	0	-		-
TRINITY_DN54063_c0_g1_i1	(2fe-2s) ferredoxin	675	1	0.0259597	0.53	3	F:metal ion binding; F:electron carrier activity; F:iron-sulfur cluster binding		F:GO:0046872; F:GO:0009055; F:GO:0051536	43.5134	gi|494923043|ref|WP_007649078.1|(2Fe-2S) ferredoxin [Xanthomarina gelatinilytica]	WP_007649078.1,EMQ95292.1
TRINITY_DN51459_c0_g1_i1	(2fe-2s) ferredoxin	506	1	8.82571e-15	0.48	0	-		-
TRINITY_DN7675_c0_g1_i1	(2fe-2s)-binding protein	270	1	0.172877	0.57	9	F:oxidoreductase activity, acting on paired donors, with incorporation or reduction of molecular oxygen, NAD(P)H as one donor, and incorporation of two atoms of oxygen into one donor; F:iron ion binding; P:oxidation-reduction process; P:aromatic compound catabolic process; F:2 iron, 2 sulfur cluster binding; F:oxidoreductase activity; P:cellular aromatic compound metabolic process; F:iron-sulfur …		F:GO:0016708; F:GO:0005506; P:GO:0055114; P:GO:0019439; F:GO:0051537; F:GO:0016491; P:GO:0006725; F:GO:0051536; F:GO:0046872	39.6614	gi|488688644|ref|WP_002612845.1|(2Fe-2S)-binding protein [Stigmatella aurantiaca]	WP_002612845.1,EAU67596.1,ADO69493.1
TRINITY_DN45111_c0_g1_i1	(2fe-2s)-binding protein	254	1	2.75496	0.56	5	F:metal ion binding; P:oxidation-reduction process; F:oxidoreductase activity; F:2 iron, 2 sulfur cluster binding; F:iron-sulfur cluster binding		F:GO:0046872; P:GO:0055114; F:GO:0016491; F:GO:0051537; F:GO:0051536	36.1946	gi|493145030|ref|WP_006159374.1|(2Fe-2S)-binding protein [Cupriavidus basilensis]	WP_006159374.1,EHP41573.1
TRINITY_DN21437_c0_g1_i2	(2fe-2s)-binding protein	265	1	0.852218	0.6	0	-		-
TRINITY_DN21562_c0_g1_i2	(2fe-2s)-binding protein	420	1	6.75148	0.46	0	-		-
TRINITY_DN49893_c0_g1_i1	(2fe-2s)-binding protein	217	1	1.52806	0.68	0	-		-
TRINITY_DN41735_c0_g1_i1	(2fe-2s)-binding protein	313	1	1.05542	0.61	0	-		-
TRINITY_DN36535_c0_g1_i1	(2fe-2s)-binding protein	238	1	0.630206	0.63	0	-		-
TRINITY_DN54624_c0_g1_i1	(4fe-4s)-binding protein	216	1	2.78234	0.45	1	F:iron-sulfur cluster binding		F:GO:0051536	35.4242	gi|504638604|ref|WP_014825706.1|(4Fe-4S)-binding protein [Desulfosporosinus acidiphilus]	WP_014825706.1,AFM39694.1
TRINITY_DN26392_c0_g1_i1	(4fe-4s)-binding protein	1762	1	6.70578	0.45	0	-		-
TRINITY_DN62967_c0_g1_i1	(fe-s)-binding protein	216	1	2.39098	0.65	0	-		-
TRINITY_DN51406_c0_g1_i1	(restriction endonuclease)	428	1	5.09205	0.51	0	-		-
TRINITY_DN62368_c0_g1_i1	: phosphate partial	206	1	5.92351e-25	0.8	0	-		-
TRINITY_DN44333_c0_g1_i1	[citrate (pro-3S)-lyase] ligase [Dickeya dadantii]	279	1	0.428044	0.5	0	-		-
TRINITY_DN29877_c0_g1_i1	[FeFe]-hydrogenase, partial [uncultured bacterium]	488	1	8.62275	0.48	0	-		-
TRINITY_DN21129_c0_g1_i1	[glutamate--ammonia-ligase] adenylyltransferase [Rhodopirellula baltica]	210	1	1.35168	0.54	0	-		-
TRINITY_DN27557_c0_g1_i7	[NiFe] hydrogenase metallocenter assembly protein HypF [Dissulfuribacter thermophilus]	411	1	3.33605	0.53	0	-		-
TRINITY_DN27557_c0_g1_i4	[NiFe] hydrogenase metallocenter assembly protein HypF [Dissulfuribacter thermophilus]	345	1	1.76861	0.53	0	-		-
TRINITY_DN34653_c1_g1_i2	[protein-PII] uridylyltransferase [Gilliamella apicola]	1278	1	3.43569	0.54	0	-		-
TRINITY_DN34653_c1_g1_i1	[protein-PII] uridylyltransferase [Gilliamella apicola]	1220	1	3.1987	0.54	0	-		-
TRINITY_DN37850_c0_g1_i1	[Protein-PII] uridylyltransferase [Rhodovulum sp. PH10]	251	1	2.57486	0.55	11	F:transferase activity; F:hydrolase activity; P:regulation of nitrogen utilization; F:[protein-PII] uridylyltransferase activity; P:nitrogen compound metabolic process; F:amino acid binding; F:nucleotidyltransferase activity; F:catalytic activity; F:phosphoric diester hydrolase activity; F:metal ion binding; P:metabolic process		F:GO:0016740; F:GO:0016787; P:GO:0006808; F:GO:0008773; P:GO:0006807; F:GO:0016597; F:GO:0016779; F:GO:0003824; F:GO:0008081; F:GO:0046872; P:GO:0008152	36.1946	gi|402499632|gb|EJW11331.1|[Protein-PII] uridylyltransferase [Rhodovulum sp. PH10]	EJW11331.1
TRINITY_DN17253_c0_g2_i1	[Pyruvate dehydrogenase [acetyl-transferring]]-phosphatase 1, mitochondrial [Hanseniaspora uvarum DSM 2768]	288	1	2.11605	0.52	0	-		-
TRINITY_DN40845_c0_g1_i1	1 4-alpha-glucan branching enzyme	335	1	7.6571	0.44	0	-		-
TRINITY_DN46222_c0_g1_i1	1 4-alpha-glucan branching enzyme	525	1	8.10051	0.51	0	-		-
TRINITY_DN53056_c0_g1_i1	1 4-alpha-glucan branching enzyme 2	298	1	6.51114	0.45	0	-		-
TRINITY_DN9404_c0_g1_i1	1 family beta-lactam sensor signal transducer	718	1	2.50427	0.39	0	-		-
TRINITY_DN60507_c0_g1_i1	1 family t6ss atpase	253	1	5.55613	0.55	0	-		-
TRINITY_DN35135_c1_g2_i1	1 homeobox partial	2544	1	2.97081e-55	0.92	0	-		-
TRINITY_DN11345_c0_g1_i1	1 homeobox-like protein	422	1	1.88201e-36	0.98	0	-		-
TRINITY_DN11345_c0_g2_i1	1 homeobox-like protein	422	1	1.88201e-36	0.98	0	-		-
TRINITY_DN27111_c0_g1_i1	1 homeobox-like protein	1100	1	4.14064e-31	0.66	0	-		-
TRINITY_DN16419_c0_g2_i1	1-(5-phosphoribosyl)-5-((5-phosphoribosylamino)methylideneamino)imidazole-4-carboxamide isomerase	918	1	5.89953	0.48	0	-		-
TRINITY_DN47246_c0_g1_i1	1-(5-phosphoribosyl)-5-[(5-phosphoribosylamino)methylideneamino] imidazole-4-carboxamide isomerase [Candidatus Synechococcus spongiarum SP3]	469	1	2.65147	0.6	0	-		-
TRINITY_DN56390_c0_g1_i1	1-(5-phosphoribosyl)-5-amino-4-imidazole-carboxylate carboxylase	256	1	0.691461	0.53	0	-		-
TRINITY_DN18099_c0_g1_i1	1-(5-phosphoribosyl)-5-amino-4-imidazole-carboxylate carboxylase	330	1	1.8268	0.54	0	-		-
TRINITY_DN18923_c0_g1_i1	1,4-beta-xylanase [Streptomyces neyagawaensis]	596	1	7.77937	0.43	0	-		-
TRINITY_DN8448_c0_g1_i1	10 kda chaperonin	205	1	2.33966e-14	0.71	2	C:cytoplasm; P:protein folding		C:GO:0005737; P:GO:0006457	70.4774	gi|118361262|ref|XP_001013861.1|10 kDa chaperonin [Tetrahymena thermophila SB210]	XP_001013861.1,EAR93616.1
TRINITY_DN50322_c0_g1_i1	10 kda chaperonin	229	1	2.74973e-23	0.98	0	-		-
TRINITY_DN6394_c0_g2_i1	10 kda chaperonin	573	1	2.08106e-49	0.95	0	-		-
TRINITY_DN29512_c0_g1_i3	10-formyltetrahydrofolate dehydrogenase	1422	1	4.66388e-126	0.91	0	-		-
TRINITY_DN29512_c0_g1_i1	10-formyltetrahydrofolate dehydrogenase	1257	1	9.15037e-129	0.74	0	-		-
TRINITY_DN29512_c0_g1_i2	10-formyltetrahydrofolate dehydrogenase	1282	1	3.98908e-155	0.91	0	-		-
TRINITY_DN20411_c0_g3_i1	110 kda partial	209	1	0.00116147	0.63	0	-		-
TRINITY_DN20411_c0_g4_i1	110 kda partial	233	1	0.000391683	0.6	0	-		-
TRINITY_DN20411_c0_g1_i1	110 kda partial	263	1	2.48879e-06	0.61	0	-		-
TRINITY_DN24908_c0_g1_i1	116 kda u5 small nuclear ribonucleoprotein component partial	387	1	1.09389e-67	0.98	0	-		-
TRINITY_DN34703_c0_g1_i1	116 kda u5 small nuclear ribonucleoprotein component protein	3117	1	0	0.96	0	-		-
TRINITY_DN24908_c0_g1_i2	116 kda u5 small nuclear ribonucleoprotein component protein	319	1	2.76021e-48	0.94	0	-		-
TRINITY_DN28600_c0_g1_i4	116 kda u5 small nuclear ribonucleoprotein component protein	547	1	1.95489e-90	0.95	0	-		-
TRINITY_DN24908_c0_g1_i3	116 kda u5 small nuclear ribonucleoprotein component protein	518	1	1.71532e-93	0.97	0	-		-
TRINITY_DN28600_c0_g1_i5	116 kda u5 small nuclear ribonucleoprotein component protein	609	1	9.60345e-98	0.92	0	-		-
TRINITY_DN5352_c0_g1_i1	13e12 repeat-containing protein	345	1	1.57541	0.58	0	-		-
TRINITY_DN32155_c0_g1_i8	14-3- partial	316	1	1.86733e-46	1	1	F:protein domain specific binding	-	F:GO:0019904	153.68	gi|226022670|dbj|BAH36879.1|14-3-3zeta, partial [Gryllus bimaculatus]	BAH36879.1
TRINITY_DN24396_c0_g1_i1	14-3-3 partial	697	1	1.22852e-120	0.92	1	F:protein domain specific binding	-	F:GO:0019904	351.673	gi|330690205|gb|AEC33277.1|14-3-3 protein, partial [Penaeus monodon]	AEC33277.1
TRINITY_DN51990_c0_g1_i1	14-3-3 protein	413	1	5.80446e-40	0.8	0	-		-
TRINITY_DN45762_c0_g1_i1	14-3-3 protein 2	253	1	5.61238e-17	0.65	0	-		-
TRINITY_DN25966_c0_g1_i1	14-3-3 protein epsilon	1136	1	7.0182e-180	1	1	F:protein domain specific binding	-	F:GO:0019904	508.449	gi|321460806|gb|EFX71844.1|hypothetical protein DAPPUDRAFT_326737 [Daphnia pulex]	EFX71844.1,KZS20952.1
TRINITY_DN43846_c0_g1_i1	14-3-3 protein epsilon	266	1	1.62985e-54	1	1	F:protein domain specific binding	-	F:GO:0019904	178.333	gi|321460806|gb|EFX71844.1|hypothetical protein DAPPUDRAFT_326737 [Daphnia pulex]	EFX71844.1,KZS20952.1
TRINITY_DN47298_c0_g1_i1	14-3-3 protein epsilon	326	1	2.65552e-60	0.95	0	-		-
TRINITY_DN3435_c0_g2_i1	14-3-3 protein zeta	268	1	0.000315489	0.44	1	F:protein domain specific binding		F:GO:0019904	46.595	gi|307207600|gb|EFN85264.1|14-3-3 protein zeta [Harpegnathos saltator]	EFN85264.1
TRINITY_DN18779_c0_g1_i1	14-3-3 protein zeta	317	1	2.84731	0.53	0	-		-
TRINITY_DN32155_c0_g1_i9	14-3-3 protein zeta delta	247	1	4.60328e-14	1	0	-		-
TRINITY_DN32155_c0_g1_i1	14-3-3 protein zeta partial	401	1	5.01597e-55	1	0	-		-
TRINITY_DN32155_c0_g1_i5	14-3-3 protein zeta partial	371	1	8.26238e-52	1	0	-		-
TRINITY_DN32155_c0_g1_i6	14-3-3 zeta	347	1	1.53014e-56	0.94	1	F:protein domain specific binding	-	F:GO:0019904	184.111	gi|321463228|gb|EFX74245.1|hypothetical protein DAPPUDRAFT_307391 [Daphnia pulex]	EFX74245.1,AHJ25961.1,KZS10465.1
TRINITY_DN2672_c0_g1_i1	14-3-3 zeta	3580	1	2.08217e-157	0.96	1	F:protein domain specific binding	-	F:GO:0019904	478.019	gi|321463228|gb|EFX74245.1|hypothetical protein DAPPUDRAFT_307391 [Daphnia pulex]	EFX74245.1,AHJ25961.1,KZS10465.1
TRINITY_DN32155_c0_g1_i3	14-3-3 zeta	368	1	2.99568e-71	0.95	1	F:protein domain specific binding	-	F:GO:0019904	221.861	gi|321463228|gb|EFX74245.1|hypothetical protein DAPPUDRAFT_307391 [Daphnia pulex]	EFX74245.1,AHJ25961.1,KZS10465.1
TRINITY_DN32155_c0_g1_i2	14-3-3 zeta	329	1	4.62786e-52	0.94	1	F:protein domain specific binding	-	F:GO:0019904	172.555	gi|321463228|gb|EFX74245.1|hypothetical protein DAPPUDRAFT_307391 [Daphnia pulex]	EFX74245.1,AHJ25961.1,KZS10465.1
TRINITY_DN19935_c0_g1_i1	14-3-3 zeta	233	1	6.77952e-18	0.91	1	F:protein domain specific binding	-	F:GO:0019904	83.5741	gi|321463228|gb|EFX74245.1|hypothetical protein DAPPUDRAFT_307391 [Daphnia pulex]	EFX74245.1,AHJ25961.1,KZS10465.1
TRINITY_DN2672_c0_g2_i1	14-3-3 zeta	3580	1	5.27594e-163	0.97	1	F:protein domain specific binding	-	F:GO:0019904	492.656	gi|321463228|gb|EFX74245.1|hypothetical protein DAPPUDRAFT_307391 [Daphnia pulex]	EFX74245.1,AHJ25961.1,KZS10465.1
TRINITY_DN19935_c0_g2_i1	14-3-3 zeta	231	1	6.51448e-18	0.91	1	F:protein domain specific binding	-	F:GO:0019904	83.5741	gi|321463228|gb|EFX74245.1|hypothetical protein DAPPUDRAFT_307391 [Daphnia pulex]	EFX74245.1,AHJ25961.1,KZS10465.1
TRINITY_DN32155_c0_g1_i4	14-3-3 zeta	1138	1	6.27562e-106	0.96	1	F:protein domain specific binding	-	F:GO:0019904	320.472	gi|321463228|gb|EFX74245.1|hypothetical protein DAPPUDRAFT_307391 [Daphnia pulex]	EFX74245.1,AHJ25961.1,KZS10465.1
TRINITY_DN32155_c0_g1_i7	14-3-3 zeta	511	1	2.14449e-99	0.97	1	F:protein domain specific binding	-	F:GO:0019904	295.434	gi|321463228|gb|EFX74245.1|hypothetical protein DAPPUDRAFT_307391 [Daphnia pulex]	EFX74245.1,AHJ25961.1,KZS10465.1
TRINITY_DN5912_c0_g2_i1	15 kda selenoprotein	771	1	1.00698e-52	0.72	0	-		-
TRINITY_DN5912_c0_g1_i1	15 kda selenoprotein	771	1	1.55534e-52	0.72	0	-		-
TRINITY_DN11851_c0_g1_i1	16s rrna (adenine -n adenine -n )-dimethyltransferase	405	1	3.33936	0.54	12	F:transferase activity; P:methylation; F:16S rRNA (adenine(1518)-N(6)/adenine(1519)-N(6))-dimethyltransferase activity; F:methyltransferase activity; P:rRNA processing; C:cytoplasm; F:RNA binding; F:rRNA (adenine) methyltransferase activity; P:rRNA methylation; P:rRNA modification; F:rRNA (adenine-N6,N6-)-dimethyltransferase activity; F:rRNA methyltransferase activity		F:GO:0016740; P:GO:0032259; F:GO:0052908; F:GO:0008168; P:GO:0006364; C:GO:0005737; F:GO:0003723; F:GO:0016433; P:GO:0031167; P:GO:0000154; F:GO:0000179; F:GO:0008649	37.3502	gi|490148782|ref|WP_004048801.1|16S rRNA (adenine(1518)-N(6)/adenine(1519)-N(6))-dimethyltransferase [Lactobacillus murinus]	WP_004048801.1,EMZ17812.1
TRINITY_DN29809_c0_g1_i1	16s rrna (adenine -n adenine -n )-dimethyltransferase	1125	1	2.07137	0.43	0	-		-
TRINITY_DN24190_c0_g4_i1	16s rrna (adenine -n adenine -n )-dimethyltransferase	252	1	2.55678	0.51	0	-		-
TRINITY_DN15803_c0_g1_i1	16s rrna (adenine -n adenine -n )-dimethyltransferase	515	1	0.658231	0.5	0	-		-
TRINITY_DN37179_c0_g1_i1	16s rrna (cytosine -c )-methyltransferase	359	1	3.14188	0.48	0	-		-
TRINITY_DN41116_c0_g1_i1	16s rrna (cytosine -n )-methyltransferase	278	1	6.24186	0.49	0	-		-
TRINITY_DN58994_c0_g1_i1	16s rrna (cytosine -n )-methyltransferase	273	1	3.71055	0.53	0	-		-
TRINITY_DN64470_c0_g1_i1	16s rrna (uracil -n )-methyltransferase	310	1	9.58725	0.46	5	F:methyltransferase activity; P:rRNA processing; C:cytoplasm; F:transferase activity; P:methylation		F:GO:0008168; P:GO:0006364; C:GO:0005737; F:GO:0016740; P:GO:0032259	35.039	gi|499855965|ref|WP_011536699.1|16S rRNA (uracil(1498)-N(3))-methyltransferase [Ruegeria sp. TM1040]	WP_011536699.1,ABF62053.1
TRINITY_DN26391_c0_g1_i4	16s rrna (uracil -n )-methyltransferase	675	1	9.9632	0.53	0	-		-
TRINITY_DN26391_c0_g1_i2	16s rrna (uracil -n )-methyltransferase	463	1	4.10533	0.53	0	-		-
TRINITY_DN29433_c0_g1_i1	16s rrna (uracil -n )-methyltransferase	469	1	2.24745	0.55	0	-		-
TRINITY_DN17136_c0_g2_i1	16s rrna methyltransferase	223	1	5.43735	0.53	0	-		-
TRINITY_DN61105_c0_g1_i1	16s rrna methyltransferase	445	1	1.20637	0.6	0	-		-
TRINITY_DN47748_c0_g1_i1	16s rrna methyltransferase g	426	1	3.22736	0.55	0	-		-
TRINITY_DN11085_c0_g1_i1	16s rrna processing protein	214	1	1.01013	0.51	0	-		-
TRINITY_DN11085_c0_g2_i1	16s rrna processing protein	250	1	0.894361	0.52	0	-		-
TRINITY_DN28316_c0_g1_i1	18s rrna (guanine-n )-methyltransferase	6006	1	4.16573e-144	0.93	0	-		-
TRINITY_DN33933_c0_g1_i2	1-acyl-glycerol-3-phosphate acyltransferase	997	1	0.168302	0.71	0	-		-
TRINITY_DN28414_c0_g1_i2	1-acyl-glycerol-3-phosphate acyltransferase	1756	1	8.79899e-155	0.75	0	-		-
TRINITY_DN28414_c0_g1_i1	1-acyl-glycerol-3-phosphate acyltransferase	2167	1	2.52383e-152	0.75	0	-		-
TRINITY_DN22064_c0_g1_i1	1-acylglycerol-3-phosphate o-acyltransferase abhd5	1678	1	7.51293e-119	0.69	0	-		-
TRINITY_DN22064_c0_g1_i2	1-acylglycerol-3-phosphate o-acyltransferase abhd5	1749	1	1.58774e-118	0.69	0	-		-
TRINITY_DN3364_c0_g1_i1	1-acylglycerol-3-phosphate o-acyltransferase abhd5	965	1	6.67907e-104	0.74	0	-		-
TRINITY_DN26351_c0_g1_i1	1-acylglycerol-3-phosphate o-acyltransferase abhd5	1887	1	3.92344e-160	0.77	0	-		-
TRINITY_DN3364_c0_g2_i1	1-acylglycerol-3-phosphate o-acyltransferase abhd5	557	1	7.08708e-70	0.74	0	-		-
TRINITY_DN65339_c0_g1_i1	1-acylglycerol-3-phosphate o-acyltransferase abhd5-like isoform x1	217	1	5.12227e-14	0.71	0	-		-
TRINITY_DN46163_c0_g1_i1	1-acylglycerol-3-phosphoethanolamine acyltransferase 2	208	1	4.05646	0.52	0	-		-
TRINITY_DN24354_c0_g1_i4	1-acylglycerophosphocholine o-acyltransferase	2599	1	0	0.79	0	-		-
TRINITY_DN24354_c0_g1_i2	1-acylglycerophosphocholine o-acyltransferase	2656	1	0	0.79	0	-		-
TRINITY_DN3186_c0_g1_i1	1-acyl-sn-glycerol-3-phosphate acyltransferase	230	1	0.157717	0.5	4	F:1-acylglycerol-3-phosphate O-acyltransferase activity; F:transferase activity; P:metabolic process; F:transferase activity, transferring acyl groups		F:GO:0003841; F:GO:0016740; P:GO:0008152; F:GO:0016746	38.891	gi|503155421|ref|WP_013390082.1|1-acyl-sn-glycerol-3-phosphate acyltransferase [Bifidobacterium bifidum]	WP_013390082.1,YP_003971353.1,ADP36316.1,KLN81502.1
TRINITY_DN40643_c0_g1_i1	1-acyl-sn-glycerol-3-phosphate acyltransferase	232	1	1.36349	0.58	3	F:transferase activity; P:metabolic process; F:transferase activity, transferring acyl groups		F:GO:0016740; P:GO:0008152; F:GO:0016746	36.5798	gi|502676803|ref|WP_012912527.1|1-acyl-sn-glycerol-3-phosphate acyltransferase [Pirellula staleyi]	WP_012912527.1,ADB18266.1
TRINITY_DN49062_c0_g1_i1	1-acyl-sn-glycerol-3-phosphate acyltransferase	210	1	3.35712	0.58	3	F:transferase activity; P:metabolic process; F:transferase activity, transferring acyl groups		F:GO:0016740; P:GO:0008152; F:GO:0016746	33.8834	gi|553180355|ref|XP_005853388.1|1-acyl-sn-glycerol-3-phosphate acyltransferase [Nannochloropsis gaditana CCMP526]	XP_005853388.1,EKU22970.1
TRINITY_DN26132_c0_g1_i2	1-acyl-sn-glycerol-3-phosphate acyltransferase	1096	1	9.42883	0.48	0	-		-
TRINITY_DN7942_c0_g1_i1	1-acyl-sn-glycerol-3-phosphate acyltransferase	446	1	0.0826758	0.63	0	-		-
TRINITY_DN63035_c0_g1_i1	1-acyl-sn-glycerol-3-phosphate acyltransferase	406	1	2.15193	0.58	0	-		-
TRINITY_DN10540_c0_g1_i1	1-acyl-sn-glycerol-3-phosphate acyltransferase	236	1	4.54867	0.5	0	-		-
TRINITY_DN3186_c0_g2_i1	1-acyl-sn-glycerol-3-phosphate acyltransferase	230	1	0.0813321	0.5	0	-		-
TRINITY_DN52441_c0_g1_i1	1-acyl-sn-glycerol-3-phosphate acyltransferase	238	1	2.16527	0.47	0	-		-
TRINITY_DN10254_c0_g1_i1	1-acyl-sn-glycerol-3-phosphate acyltransferase alpha	1895	1	2.99915e-120	0.8	0	-		-
TRINITY_DN10254_c0_g2_i1	1-acyl-sn-glycerol-3-phosphate acyltransferase alpha	1205	1	1.67547e-44	0.92	0	-		-
TRINITY_DN33342_c0_g1_i6	1-acyl-sn-glycerol-3-phosphate acyltransferase delta	797	1	4.35865e-27	0.64	0	-		-
TRINITY_DN28773_c0_g1_i1	1-acyl-sn-glycerol-3-phosphate acyltransferase epsilon	1786	1	2.23955e-136	0.75	0	-		-
TRINITY_DN32761_c0_g1_i2	1-acyl-sn-glycerol-3-phosphate acyltransferase epsilon	1445	1	1.86935e-151	0.74	0	-		-
TRINITY_DN32761_c0_g1_i1	1-acyl-sn-glycerol-3-phosphate acyltransferase epsilon-like	436	1	1.32579e-06	0.6	0	-		-
TRINITY_DN5139_c0_g1_i1	1-aminocyclopropane-1-carboxylate oxidase homolog 1-like	217	1	4.08042	0.59	0	-		-
TRINITY_DN1527_c0_g2_i1	1-associated eps domain-containing partial	328	1	9.5646e-17	0.94	0	-		-
TRINITY_DN32392_c1_g1_i1	1-associated eps domain-containing protein	3226	1	0	0.82	0	-		-
TRINITY_DN32392_c1_g1_i7	1-associated eps domain-containing protein	3438	1	0	0.83	0	-		-
TRINITY_DN8406_c0_g2_i1	1-associated eps domain-containing protein	202	1	1.67192e-22	0.83	0	-		-
TRINITY_DN8406_c0_g1_i1	1-associated eps domain-containing protein	283	1	2.98381e-16	0.6	0	-		-
TRINITY_DN32392_c1_g1_i6	1-associated eps domain-containing protein	3292	1	0	0.79	0	-		-
TRINITY_DN13551_c0_g1_i2	1-associated eps domain-containing protein	1310	1	3.98372e-31	0.73	0	-		-
TRINITY_DN32392_c1_g1_i10	1-associated eps domain-containing protein	3519	1	0	0.79	0	-		-
TRINITY_DN13551_c0_g1_i1	1-associated eps domain-containing protein	1325	1	3.76521e-31	0.73	0	-		-
TRINITY_DN32392_c1_g1_i3	1-associated eps domain-containing protein	3453	1	0	0.82	0	-		-
TRINITY_DN32392_c1_g1_i8	1-associated eps domain-containing protein	3211	1	0	0.83	0	-		-
TRINITY_DN62319_c1_g1_i1	1chain crystal structure of the archaeal secretion atpase gspe in complex with amp-pnp	231	1	2.18281	0.48	2	F:ATP binding; P:transport		F:GO:0005524; P:GO:0006810	36.1946	gi|134105110|pdb|2OAP|1Chain 1, Crystal Structure Of The Archaeal Secretion Atpase Gspe In Complex With Amp-Pnp	2OAP,2OAP,2OAQ,2OAQ
TRINITY_DN34245_c1_g1_i1	1-deoxy-d-xylulose-5-phosphate reductoisomerase	966	1	6.9892	0.61	0	-		-
TRINITY_DN17759_c0_g1_i1	1-deoxy-d-xylulose-5-phosphate reductoisomerase	427	1	3.65185	0.49	0	-		-
TRINITY_DN48633_c0_g1_i1	1-deoxy-d-xylulose-5-phosphate synthase	245	1	0.427262	0.64	11	P:1-deoxy-D-xylulose 5-phosphate biosynthetic process; F:transferase activity; P:isoprenoid biosynthetic process; F:thiamine pyrophosphate binding; P:thiamine biosynthetic process; P:terpenoid biosynthetic process; F:1-deoxy-D-xylulose-5-phosphate synthase activity; F:catalytic activity; F:metal ion binding; P:metabolic process; F:magnesium ion binding		P:GO:0052865; F:GO:0016740; P:GO:0008299; F:GO:0030976; P:GO:0009228; P:GO:0016114; F:GO:0008661; F:GO:0003824; F:GO:0046872; P:GO:0008152; F:GO:0000287	38.1206	gi|503045405|ref|WP_013280381.1|1-deoxy-D-xylulose-5-phosphate synthase [Butyrivibrio proteoclasticus]	WP_013280381.1,ADL33725.1
TRINITY_DN27682_c0_g1_i1	1-deoxy-d-xylulose-5-phosphate synthase	293	1	1.4453	0.6	11	P:1-deoxy-D-xylulose 5-phosphate biosynthetic process; F:transferase activity; P:isoprenoid biosynthetic process; F:thiamine pyrophosphate binding; P:thiamine biosynthetic process; P:terpenoid biosynthetic process; F:1-deoxy-D-xylulose-5-phosphate synthase activity; F:catalytic activity; F:metal ion binding; P:metabolic process; F:magnesium ion binding		P:GO:0052865; F:GO:0016740; P:GO:0008299; F:GO:0030976; P:GO:0009228; P:GO:0016114; F:GO:0008661; F:GO:0003824; F:GO:0046872; P:GO:0008152; F:GO:0000287	37.3502	gi|84666082|gb|EAQ12556.1|1-deoxy-D-xylulose-5-phosphate synthase [Rhodobacterales bacterium HTCC2654]	EAQ12556.1
TRINITY_DN40120_c0_g1_i1	1-deoxy-d-xylulose-5-phosphate synthase	214	1	3.88364	0.54	0	-		-
TRINITY_DN29719_c0_g1_i4	1-like protein	2091	1	0	0.81	5	P:DNA recombination; F:nucleic acid binding; F:ATP-dependent helicase activity; P:obsolete ATP catabolic process; F:ATP binding	(3.6) Acting on acid anhydrides; (3.6) Acting on acid anhydrides; (3.6) Acting on acid anhydrides	P:GO:0006310; F:GO:0003676; F:GO:0008026; P:GO:0006200; F:GO:0005524	832.402	gi|321475158|gb|EFX86121.1|RecQ1-like protein [Daphnia pulex]	EFX86121.1
TRINITY_DN40379_c0_g1_i1	1-like protein	286	1	2.05054e-25	0.91	5	P:DNA recombination; F:nucleic acid binding; F:ATP-dependent helicase activity; P:obsolete ATP catabolic process; F:ATP binding	(3.6) Acting on acid anhydrides; (3.6) Acting on acid anhydrides; (3.6) Acting on acid anhydrides	P:GO:0006310; F:GO:0003676; F:GO:0008026; P:GO:0006200; F:GO:0005524	86.2705	gi|321475158|gb|EFX86121.1|RecQ1-like protein [Daphnia pulex]	EFX86121.1
TRINITY_DN29719_c0_g1_i3	1-like protein	1601	1	0	0.85	5	P:DNA recombination; F:nucleic acid binding; F:ATP-dependent helicase activity; P:obsolete ATP catabolic process; F:ATP binding	(3.6) Acting on acid anhydrides; (3.6) Acting on acid anhydrides; (3.6) Acting on acid anhydrides	P:GO:0006310; F:GO:0003676; F:GO:0008026; P:GO:0006200; F:GO:0005524	577.4	gi|321475158|gb|EFX86121.1|RecQ1-like protein [Daphnia pulex]	EFX86121.1
TRINITY_DN29719_c0_g1_i5	1-like protein	1679	1	0	0.78	4	F:organic cyclic compound binding; P:nucleobase-containing compound metabolic process; F:helicase activity; F:heterocyclic compound binding	(3.6) Acting on acid anhydrides; (3.6) Acting on acid anhydrides	F:GO:0097159; P:GO:0006139; F:GO:0004386; F:GO:1901363	558.91	gi|321475158|gb|EFX86121.1|RecQ1-like protein [Daphnia pulex]	EFX86121.1
TRINITY_DN29719_c0_g1_i2	1-like protein	2193	1	0	0.77	4	F:organic cyclic compound binding; P:nucleobase-containing compound metabolic process; F:helicase activity; F:heterocyclic compound binding	(3.6) Acting on acid anhydrides; (3.6) Acting on acid anhydrides	F:GO:0097159; P:GO:0006139; F:GO:0004386; F:GO:1901363	818.15	gi|321475158|gb|EFX86121.1|RecQ1-like protein [Daphnia pulex]	EFX86121.1
TRINITY_DN10172_c0_g1_i1	1-like protein	323	1	3.39356e-19	0.71	0	-		-
TRINITY_DN29719_c0_g1_i1	1-like protein	835	1	4.53875e-56	0.67	0	-		-
TRINITY_DN44227_c0_g1_i1	1-like protein	201	1	4.83529e-27	0.92	0	-		-
TRINITY_DN20339_c0_g1_i2	1-phosphatidylinositol 3-phosphate 5- partial	696	1	0.190579	0.56	0	-		-
TRINITY_DN65166_c0_g1_i1	1-phosphatidylinositol 4-kinase	210	1	6.72108	0.6	9	F:transferase activity; P:phosphatidylinositol biosynthetic process; P:phosphorylation; F:1-phosphatidylinositol 4-kinase activity; P:phosphatidylinositol phosphorylation; F:kinase activity; P:phosphatidylinositol-mediated signaling; F:phosphotransferase activity, alcohol group as acceptor; F:transferase activity, transferring phosphorus-containing groups		F:GO:0016740; P:GO:0006661; P:GO:0016310; F:GO:0004430; P:GO:0046854; F:GO:0016301; P:GO:0048015; F:GO:0016773; F:GO:0016772	34.2686	gi|930408911|ref|XP_014178728.1|1-phosphatidylinositol 4-kinase [Trichosporon asahii var. asahii CBS 2479]	XP_014178728.1,EJT47678.1
TRINITY_DN31779_c1_g1_i1	1-phosphatidylinositol -bisphosphate phosphodiesterase beta- partial	1196	1	9.57841	0.55	0	-		-
TRINITY_DN31779_c1_g1_i3	1-phosphatidylinositol -bisphosphate phosphodiesterase beta- partial	950	1	6.55196	0.55	0	-		-
TRINITY_DN31865_c0_g1_i3	1-phosphatidylinositol -bisphosphate phosphodiesterase beta-2	4551	1	0	0.92	0	-		-
TRINITY_DN44457_c0_g1_i1	1-phosphatidylinositol -bisphosphate phosphodiesterase beta-2	320	1	1.70444e-47	0.92	0	-		-
TRINITY_DN31865_c0_g1_i1	1-phosphatidylinositol -bisphosphate phosphodiesterase beta-2	4533	1	0	0.92	0	-		-
TRINITY_DN6868_c0_g1_i1	1-phosphatidylinositol -bisphosphate phosphodiesterase delta-1-like	267	1	1.92835e-06	0.52	0	-		-
TRINITY_DN56711_c0_g1_i1	1-phosphatidylinositol -bisphosphate phosphodiesterase delta-4- partial	338	1	4.9293e-12	0.61	0	-		-
TRINITY_DN21062_c0_g1_i1	1-phosphatidylinositol -bisphosphate phosphodiesterase delta-4- partial	1269	1	1.1912e-47	0.64	0	-		-
TRINITY_DN35650_c0_g1_i2	1-phosphatidylinositol -bisphosphate phosphodiesterase epsilon-1	8473	1	0	0.7	0	-		-
TRINITY_DN35650_c0_g1_i1	1-phosphatidylinositol -bisphosphate phosphodiesterase epsilon-1	6860	1	0	0.69	0	-		-
TRINITY_DN27542_c0_g1_i1	1-phosphatidylinositol -bisphosphate phosphodiesterase epsilon-1	1543	1	1.61474e-95	0.8	0	-		-
TRINITY_DN57627_c0_g1_i1	1-phosphatidylinositol -bisphosphate phosphodiesterase epsilon-1 isoform x4	443	1	2.63441	0.58	0	-		-
TRINITY_DN36542_c0_g1_i1	1-phosphatidylinositol -bisphosphate phosphodiesterase eta- partial	308	1	3.56161	0.57	0	-		-
TRINITY_DN41512_c0_g1_i1	1-phosphatidylinositol -bisphosphate phosphodiesterase eta-1 isoform x2	258	1	0.250673	0.49	0	-		-
TRINITY_DN4681_c0_g2_i1	1-phosphatidylinositol -bisphosphate phosphodiesterase gamma- partial	331	1	0.232999	0.51	0	-		-
TRINITY_DN43290_c0_g1_i1	1-phosphatidylinositol -bisphosphate phosphodiesterase gamma-1	239	1	3.68217e-24	0.83	0	-		-
TRINITY_DN24641_c0_g1_i5	1-phosphatidylinositol -bisphosphate phosphodiesterase gamma-1	677	1	4.38319e-60	0.81	0	-		-
TRINITY_DN24641_c0_g1_i3	1-phosphatidylinositol -bisphosphate phosphodiesterase gamma-1	954	1	6.26172e-87	0.81	0	-		-
TRINITY_DN27485_c0_g1_i1	1-phosphatidylinositol -bisphosphate phosphodiesterase gamma-1	5272	1	0	0.85	0	-		-
TRINITY_DN27485_c0_g1_i2	1-phosphatidylinositol -bisphosphate phosphodiesterase gamma-1	5271	1	0	0.83	0	-		-
TRINITY_DN49615_c0_g1_i1	1-phosphatidylinositol -bisphosphate phosphodiesterase gamma-1	217	1	2.09874e-06	0.71	0	-		-
TRINITY_DN32020_c0_g1_i3	1-phosphatidylinositol-3-phosphate 5-kinase	1810	1	8.26959	0.4	0	-		-
TRINITY_DN32020_c0_g1_i2	1-phosphatidylinositol-3-phosphate 5-kinase	1313	1	5.33085	0.4	0	-		-
TRINITY_DN52665_c0_g1_i1	1-phosphatidylinositol-3-phosphate 5-kinase fab1b	447	1	5.99817	0.51	0	-		-
TRINITY_DN39389_c0_g1_i1	1-phosphatidylinositol-3-phosphate 5-kinase fab1d isoform x5	319	1	0.626539	0.46	0	-		-
TRINITY_DN6534_c0_g1_i1	1-pyrroline-5-carboxylate dehydrogenase	405	1	9.7693	0.45	0	-		-
TRINITY_DN36476_c0_g1_i1	2 2 sulfur cluster-binding protein	292	1	0.00463327	0.55	3	F:metal ion binding; F:electron carrier activity; F:iron-sulfur cluster binding		F:GO:0046872; F:GO:0009055; F:GO:0051536	43.8986	gi|118353159|ref|XP_001009851.1|2 iron, 2 sulfur cluster-binding protein [Tetrahymena thermophila SB210]	XP_001009851.1,EAR89605.1
TRINITY_DN22294_c0_g1_i1	2 -5 -oligoadenylate synthase 1	489	1	9.83301	0.42	0	-		-
TRINITY_DN35645_c0_g1_i2	2 -5 rna ligase	2040	1	7.24339	0.65	0	-		-
TRINITY_DN35645_c0_g1_i19	2 -5 rna ligase	1044	1	3.11098	0.65	0	-		-
TRINITY_DN35645_c0_g1_i7	2 -5 rna ligase	1255	1	3.98231	0.65	0	-		-
TRINITY_DN28553_c0_g1_i1	2 -5 rna ligase	452	1	6.2712	0.5	0	-		-
TRINITY_DN35645_c0_g1_i16	2 -5 rna ligase	1205	1	3.78316	0.65	0	-		-
TRINITY_DN22304_c0_g1_i1	2 -5 rna ligase	582	1	2.91248e-22	0.52	0	-		-
TRINITY_DN35645_c0_g1_i8	2 -5 rna ligase	1270	1	4.39675	0.61	0	-		-
TRINITY_DN38320_c0_g1_i1	2 -5 rna ligase	336	1	1.54961	0.6	0	-		-
TRINITY_DN35645_c0_g1_i15	2 -5 rna ligase	1963	1	6.93222	0.65	0	-		-
TRINITY_DN35645_c0_g1_i3	2 -5 rna ligase	1791	1	6.22275	0.65	0	-		-
TRINITY_DN48000_c0_g1_i1	2 -5 rna ligase	211	1	1.98257	0.48	0	-		-
TRINITY_DN35645_c0_g1_i9	2 -5 rna ligase	1856	1	7.04742	0.61	0	-		-
TRINITY_DN35645_c0_g1_i12	2 -5 rna ligase	1377	1	4.50508	0.65	0	-		-
TRINITY_DN35645_c0_g1_i22	2 -5 rna ligase	1434	1	4.74157	0.65	0	-		-
TRINITY_DN45964_c0_g1_i1	2 -5 rna ligase	415	1	5.78258	0.53	0	-		-
TRINITY_DN35645_c0_g1_i18	2 -5 rna ligase	1725	1	5.94892	0.65	0	-		-
TRINITY_DN35645_c0_g1_i5	2 -5 rna ligase	1175	1	3.65869	0.65	0	-		-
TRINITY_DN35645_c0_g1_i11	2 -5 rna ligase	1897	1	6.65839	0.65	0	-		-
TRINITY_DN56131_c0_g1_i1	2 -cyclic-nucleotide 2 -phosphodiesterase	214	1	0.485579	0.51	0	-		-
TRINITY_DN33032_c0_g1_i3	2 -phosphodiesterase 12	1873	1	0	0.73	0	-		-
TRINITY_DN33032_c0_g1_i1	2 -phosphodiesterase 12	2021	1	0	0.7	0	-		-
TRINITY_DN33032_c0_g1_i2	2 -phosphodiesterase 12	1898	1	0	0.73	0	-		-
TRINITY_DN33032_c0_g1_i4	2 -phosphodiesterase 12	2046	1	0	0.7	0	-		-
TRINITY_DN31858_c0_g1_i1	2-(5 -triphosphoribosyl)-3 -dephospho synthase	278	1	5.92627	0.57	0	-		-
TRINITY_DN31858_c0_g2_i1	2-(5 -triphosphoribosyl)-3 -dephospho synthase	279	1	5.92627	0.57	0	-		-
TRINITY_DN31858_c0_g5_i1	2-(5 -triphosphoribosyl)-3 -dephospho synthase	287	1	6.90186	0.57	0	-		-
TRINITY_DN41880_c0_g1_i1	20s proteasome alpha subunit f	430	1	8.47044e-38	0.71	3	F:peptidase activity; C:proteasome complex; P:proteolysis	-	F:GO:0008233; C:GO:0000502; P:GO:0006508	138.658	gi|159466106|ref|XP_001691250.1|20S proteasome alpha subunit F [Chlamydomonas reinhardtii]	XP_001691250.1,EDP04983.1
TRINITY_DN39326_c0_g1_i1	20s proteasome alpha subunit f	212	1	6.22636e-22	0.81	0	-		-
TRINITY_DN41538_c0_g1_i1	20s proteasome beta 6 subunit	244	1	4.30188	0.54	0	-		-
TRINITY_DN20031_c0_g1_i1	20s proteasome subunit	708	1	6.96062e-86	0.81	0	-		-
TRINITY_DN53944_c0_g1_i1	20s proteasome subunit	313	1	3.10156e-28	0.85	0	-		-
TRINITY_DN41511_c0_g1_i1	20s proteasome subunit beta 1	355	1	5.70088e-40	0.83	5	C:cytoplasm; C:proteasome core complex; C:nucleus; F:threonine-type endopeptidase activity; P:proteolysis involved in cellular protein catabolic process	(3.4) Acting on peptide bonds (peptidases)	C:GO:0005737; C:GO:0005839; C:GO:0005634; F:GO:0004298; P:GO:0051603	141.354	gi|545700935|ref|XP_005702805.1|20S proteasome subunit beta 1 [Galdieria sulphuraria]	XP_005702805.1,EME26285.1
TRINITY_DN14831_c0_g1_i1	23s rrna (adenine -c )-methyltransferase	216	1	1.53093	0.5	0	-		-
TRINITY_DN43644_c0_g1_i1	23s rrna (adenine -c )-methyltransferase	245	1	2.59217	0.54	0	-		-
TRINITY_DN40633_c0_g1_i1	23s rrna (adenine -n )-methyltransferase	223	1	6.25624	0.46	8	F:RNA binding; F:methyltransferase activity; P:rRNA processing; F:transferase activity; P:rRNA base methylation; F:23S rRNA (adenine(2030)-N(6))-methyltransferase activity; P:methylation; F:rRNA methyltransferase activity		F:GO:0003723; F:GO:0008168; P:GO:0006364; F:GO:0016740; P:GO:0070475; F:GO:0036307; P:GO:0032259; F:GO:0008649	34.6538	gi|506311943|ref|WP_015831718.1|23S rRNA (adenine(2030)-N(6))-methyltransferase RlmJ [Methylotenera mobilis]	WP_015831718.1,ACT47681.1
TRINITY_DN7831_c0_g1_i1	23s rrna (adenine -n )-methyltransferase	379	1	2.21608	0.48	0	-		-
TRINITY_DN55123_c0_g1_i1	23s rrna (adenine -n )-methyltransferase	241	1	2.02755	0.56	0	-		-
TRINITY_DN49954_c0_g1_i1	23s rrna (adenine -n )-methyltransferase	378	1	2.07303	0.47	0	-		-
TRINITY_DN22653_c0_g1_i1	23s rrna (guanine -n ) (guanine -n )-methyltransferase	330	1	0.89207	0.58	0	-		-
TRINITY_DN39460_c0_g1_i1	23s rrna (guanosine -2 -o)-methyltransferase	296	1	5.71108	0.53	0	-		-
TRINITY_DN32374_c0_g2_i1	23s rrna (uracil -c )-methyltransferase	270	1	5.93419	0.5	0	-		-
TRINITY_DN26174_c0_g1_i1	23s rrna (uracil-5-)-methyltransferase	866	1	4.00518	0.58	7	F:RNA binding; F:methyltransferase activity; F:transferase activity; P:RNA methylation; P:RNA processing; P:methylation; F:RNA methyltransferase activity		F:GO:0003723; F:GO:0008168; F:GO:0016740; P:GO:0001510; P:GO:0006396; P:GO:0032259; F:GO:0008173	40.0466	gi|493501358|ref|WP_006455870.1|23S rRNA (uracil-5-)-methyltransferase RumA [Synechococcus sp. PCC 7335]	WP_006455870.1,EDX86111.1
TRINITY_DN11993_c0_g2_i1	23s rrna (uracil-5-)-methyltransferase	648	1	9.09277	0.6	7	F:RNA binding; F:methyltransferase activity; F:transferase activity; P:RNA methylation; P:RNA processing; P:methylation; F:RNA methyltransferase activity		F:GO:0003723; F:GO:0008168; F:GO:0016740; P:GO:0001510; P:GO:0006396; P:GO:0032259; F:GO:0008173	37.7354	gi|291531341|emb|CBK96926.1|23S rRNA (uracil-5-)-methyltransferase RumA [ [[Eubacterium] siraeum 70/3]	CBK96926.1
TRINITY_DN45221_c0_g1_i1	23s rrna (uracil-5-)-methyltransferase	206	1	0.755248	0.54	0	-		-
TRINITY_DN1535_c0_g1_i1	23s rrna methyltransferase	808	1	0.256414	0.4	0	-		-
TRINITY_DN27577_c0_g1_i4	23s rrna pseudouridylate synthase b	338	1	1.04862	0.52	0	-		-
TRINITY_DN32809_c0_g1_i1	24-dehydrocholesterol reductase	2809	1	0	0.91	4	F:flavin adenine dinucleotide binding; F:UDP-N-acetylmuramate dehydrogenase activity; P:oxidation-reduction process; P:amino sugar metabolic process	(1.1) Acting on the CH-OH group of donors	F:GO:0050660; F:GO:0008762; P:GO:0055114; P:GO:0006040	887.871	gi|251825191|gb|ACT20729.1|24-dehydrocholesterol reductase [Daphnia pulex]	ACT20729.1,EFX83687.1
TRINITY_DN35216_c0_g1_i7	25-hydroxyvitamin d-1 alpha mitochondrial	651	1	7.91611e-38	0.74	0	-		-
TRINITY_DN35216_c0_g1_i3	25-hydroxyvitamin d-1 alpha mitochondrial	672	1	1.26226e-36	0.85	0	-		-
TRINITY_DN13031_c0_g1_i1	25-hydroxyvitamin d-1 alpha mitochondrial	392	1	8.73779e-17	0.78	0	-		-
TRINITY_DN35216_c0_g1_i9	25-hydroxyvitamin d-1 alpha mitochondrial	994	1	4.39771e-63	0.66	0	-		-
TRINITY_DN47924_c0_g2_i1	25-hydroxyvitamin d-1 alpha mitochondrial	325	1	4.5077e-23	0.91	0	-		-
TRINITY_DN35216_c0_g1_i2	25-hydroxyvitamin d-1 alpha mitochondrial	712	1	2.08083e-46	0.84	0	-		-
TRINITY_DN24899_c0_g1_i2	25-hydroxyvitamin d-1 alpha mitochondrial	416	1	4.09855e-05	0.64	0	-		-
TRINITY_DN30162_c1_g1_i1	25-hydroxyvitamin d-1 alpha mitochondrial	2512	1	0	0.72	0	-		-
TRINITY_DN25593_c0_g2_i2	25-hydroxyvitamin d-1 alpha mitochondrial	1109	1	1.85945e-45	0.67	0	-		-
TRINITY_DN25593_c0_g2_i1	25-hydroxyvitamin d-1 alpha mitochondrial	1051	1	1.71287e-45	0.67	0	-		-
TRINITY_DN32166_c0_g1_i3	25-hydroxyvitamin d-1 alpha mitochondrial	1139	1	4.0535e-51	0.71	0	-		-
TRINITY_DN47924_c0_g1_i1	25-hydroxyvitamin d-1 alpha mitochondrial	325	1	4.59706e-23	0.91	0	-		-
TRINITY_DN28031_c0_g1_i13	25-hydroxyvitamin d-1 alpha mitochondrial	216	1	9.11995e-13	0.75	0	-		-
TRINITY_DN32166_c0_g1_i1	25-hydroxyvitamin d-1 alpha partial	688	1	0.0357939	0.62	0	-		-
TRINITY_DN26970_c0_g1_i1	26s protease regulatory partial	1586	1	0	0.99	0	-		-
TRINITY_DN26127_c0_g1_i1	26s protease regulatory subunit	1595	1	0	0.99	4	C:cytoplasm; P:protein catabolic process; F:ATP binding; F:nucleoside-triphosphatase activity	(3.6) Acting on acid anhydrides; (3.6) Acting on acid anhydrides	C:GO:0005737; P:GO:0030163; F:GO:0005524; F:GO:0017111	783.097	gi|321476874|gb|EFX87834.1|hypothetical protein DAPPUDRAFT_306359 [Daphnia pulex]	EFX87834.1,KZS08056.1
TRINITY_DN21393_c0_g1_i1	26s protease regulatory subunit	311	1	5.45974e-28	0.98	4	C:cytoplasm; P:protein catabolic process; F:ATP binding; F:nucleoside-triphosphatase activity	(3.6) Acting on acid anhydrides; (3.6) Acting on acid anhydrides	C:GO:0005737; P:GO:0030163; F:GO:0005524; F:GO:0017111	114.39	gi|321476874|gb|EFX87834.1|hypothetical protein DAPPUDRAFT_306359 [Daphnia pulex]	EFX87834.1,KZS08056.1
TRINITY_DN16818_c0_g1_i1	26s protease regulatory subunit	2026	1	0	0.97	0	-		-
TRINITY_DN14830_c0_g1_i2	26s protease regulatory subunit	206	1	8.78868e-26	0.98	0	-		-
TRINITY_DN14830_c0_g1_i3	26s protease regulatory subunit	231	1	6.8449e-41	0.98	0	-		-
TRINITY_DN9722_c0_g2_i1	26s protease regulatory subunit 10b	1745	1	0	0.99	0	-		-
TRINITY_DN9722_c0_g1_i1	26s protease regulatory subunit 10b	1745	1	0	0.99	0	-		-
TRINITY_DN20740_c0_g1_i1	26s protease regulatory subunit 4-like	252	1	6.26124e-11	0.95	0	-		-
TRINITY_DN18940_c0_g1_i1	26s protease regulatory subunit 6b	1559	1	0	0.98	0	-		-
TRINITY_DN29531_c0_g1_i1	26s protease regulatory subunit partial	229	1	9.44385	0.52	0	-		-
TRINITY_DN17760_c0_g2_i1	26s protease regulatory subunit partial	336	1	5.06825e-07	0.69	0	-		-
TRINITY_DN17760_c0_g1_i1	26s protease regulatory subunit partial	336	1	1.98979e-05	0.68	0	-		-
TRINITY_DN53152_c0_g1_i1	26s proteasome	202	1	2.54047e-32	0.97	6	C:proteasome complex; P:obsolete ATP catabolic process; F:ATP binding; F:ATPase activity; P:protein catabolic process; C:cytoplasm	(3.6) Acting on acid anhydrides; (3.6) Acting on acid anhydrides; (3.6) Acting on acid anhydrides	C:GO:0000502; P:GO:0006200; F:GO:0005524; F:GO:0016887; P:GO:0030163; C:GO:0005737	124.405	gi|471221360|ref|XP_004027618.1|26S proteasome protein, macropain, putative [Ichthyophthirius multifiliis]	XP_004027618.1,EGR28273.1
TRINITY_DN42864_c0_g1_i1	26s proteasome non-atpase regulatory	218	1	0.0692053	0.64	3	P:proteolysis; C:proteasome complex; C:proteasome regulatory particle		P:GO:0006508; C:GO:0000502; C:GO:0005838	40.0466	gi|242024598|ref|XP_002432714.1|26S proteasome non-ATPase regulatory subunit, putative [Pediculus humanus corporis]	XP_002432714.1,EEB19976.1
TRINITY_DN37020_c0_g1_i1	26s proteasome non-atpase regulatory partial	763	1	2.29884e-11	0.9	0	-		-
TRINITY_DN28299_c0_g1_i1	26s proteasome non-atpase regulatory subunit	771	1	2.17093e-10	0.63	0	-		-
TRINITY_DN24206_c0_g1_i1	26s proteasome non-atpase regulatory subunit	1267	1	0	0.99	0	-		-
TRINITY_DN33965_c0_g1_i1	26s proteasome non-atpase regulatory subunit	3563	1	0	0.9	0	-		-
TRINITY_DN60839_c0_g1_i1	26s proteasome non-atpase regulatory subunit	259	1	2.44928e-12	0.77	0	-		-
TRINITY_DN25578_c0_g1_i1	26s proteasome non-atpase regulatory subunit	1364	1	7.12163e-134	0.89	0	-		-
TRINITY_DN65191_c0_g1_i1	26s proteasome non-atpase regulatory subunit	301	1	0.0700072	0.65	0	-		-
TRINITY_DN11143_c0_g2_i1	26s proteasome non-atpase regulatory subunit	433	1	2.00866e-61	0.9	0	-		-
TRINITY_DN28299_c0_g1_i2	26s proteasome non-atpase regulatory subunit	751	1	2.63983e-10	0.63	0	-		-
TRINITY_DN53783_c0_g1_i1	26s proteasome non-atpase regulatory subunit 1	263	1	0.278379	0.44	0	-		-
TRINITY_DN32788_c0_g1_i4	26s proteasome non-atpase regulatory subunit 10	208	1	6.49776e-06	0.76	0	-		-
TRINITY_DN32788_c0_g1_i9	26s proteasome non-atpase regulatory subunit 10	325	1	4.12425e-16	0.81	0	-		-
TRINITY_DN41256_c0_g1_i1	26s proteasome non-atpase regulatory subunit 10	315	1	0.000548487	0.47	0	-		-
TRINITY_DN32788_c0_g1_i5	26s proteasome non-atpase regulatory subunit 10	959	1	2.853e-41	0.56	0	-		-
TRINITY_DN27268_c0_g1_i1	26s proteasome non-atpase regulatory subunit 10	1195	1	1.99846e-68	0.68	0	-		-
TRINITY_DN32788_c0_g1_i1	26s proteasome non-atpase regulatory subunit 10	1213	1	4.16572e-41	0.56	0	-		-
TRINITY_DN32788_c0_g1_i6	26s proteasome non-atpase regulatory subunit 10	901	1	1.23162e-47	0.56	0	-		-
TRINITY_DN32788_c0_g1_i2	26s proteasome non-atpase regulatory subunit 10	1155	1	1.24597e-46	0.56	0	-		-
TRINITY_DN32788_c0_g1_i7	26s proteasome non-atpase regulatory subunit 10-like	811	1	2.87885e-34	0.57	0	-		-
TRINITY_DN32788_c0_g1_i3	26s proteasome non-atpase regulatory subunit 10-like	1136	1	5.2462e-34	0.57	0	-		-
TRINITY_DN32788_c0_g1_i8	26s proteasome non-atpase regulatory subunit 10-like	882	1	3.40954e-34	0.57	0	-		-
TRINITY_DN18493_c0_g1_i1	26s proteasome non-atpase regulatory subunit 10-like	706	1	4.09338e-13	0.53	0	-		-
TRINITY_DN27705_c0_g2_i1	26s proteasome non-atpase regulatory subunit 11	1910	1	0	0.93	0	-		-
TRINITY_DN40859_c0_g1_i1	26s proteasome non-atpase regulatory subunit 12	1852	1	0	0.94	0	-		-
TRINITY_DN24819_c0_g1_i1	26s proteasome non-atpase regulatory subunit 13	1301	1	0	0.89	0	-		-
TRINITY_DN9966_c0_g1_i1	26s proteasome non-atpase regulatory subunit 14	1216	1	5.06891e-73	0.94	0	-		-
TRINITY_DN29666_c0_g1_i6	26s proteasome non-atpase regulatory subunit 6	1489	1	1.39647e-52	0.72	0	-		-
TRINITY_DN29666_c0_g1_i2	26s proteasome non-atpase regulatory subunit 6	1134	1	2.61466e-62	0.73	0	-		-
TRINITY_DN29666_c0_g1_i10	26s proteasome non-atpase regulatory subunit 6	1456	1	1.36271e-52	0.72	0	-		-
TRINITY_DN13439_c0_g2_i1	26s proteasome non-atpase regulatory subunit 9	827	1	4.4681e-79	0.77	0	-		-
TRINITY_DN13439_c0_g1_i1	26s proteasome non-atpase regulatory subunit 9	830	1	3.974e-79	0.77	0	-		-
TRINITY_DN13439_c0_g3_i1	26s proteasome non-atpase regulatory subunit 9	961	1	2.0196e-78	0.77	0	-		-
TRINITY_DN24048_c0_g1_i1	26s proteasome non-atpase regulatory subunit partial	622	1	5.94545e-24	0.68	0	-		-
TRINITY_DN28839_c0_g1_i1	26s proteasome non-atpase regulatory subunit partial	451	1	1.35353e-40	0.96	0	-		-
TRINITY_DN6603_c0_g1_i1	26s proteasome regulatory atpase subunit 10b	344	1	1.60074e-50	0.85	5	C:cytoplasm; P:protein catabolic process; F:ATP binding; C:proteasome complex; F:nucleoside-triphosphatase activity	(3.6) Acting on acid anhydrides; (3.6) Acting on acid anhydrides	C:GO:0005737; P:GO:0030163; F:GO:0005524; C:GO:0000502; F:GO:0017111	172.94	gi|118383904|ref|XP_001025106.1|26S proteasome regulatory ATPase subunit 10B [Tetrahymena thermophila SB210]	XP_001025106.1,EAS04861.1
TRINITY_DN11143_c0_g1_i1	26s proteasome regulatory complex subunit p97	275	1	7.88125e-36	0.98	0	-		-
TRINITY_DN49609_c0_g1_i1	26s proteasome regulatory non-atpase rpn2 psmd1 subunit	215	1	8.9346e-17	0.71	0	-		-
TRINITY_DN15545_c0_g3_i1	26s proteasome regulatory subunit partial	349	1	7.09141	0.54	0	-		-
TRINITY_DN2837_c0_g1_i1	26s proteasome regulatory subunit s14	298	1	2.45914e-12	0.62	0	-		-
TRINITY_DN3974_c0_g1_i1	26s proteasome subunit atpase partial	244	1	3.2357	0.61	7	F:ATP binding; C:cytoplasm; C:proteasome complex; P:protein catabolic process; F:hydrolase activity; F:nucleotide binding; F:nucleoside-triphosphatase activity		F:GO:0005524; C:GO:0005737; C:GO:0000502; P:GO:0030163; F:GO:0016787; F:GO:0000166; F:GO:0017111	35.4242	gi|225320679|dbj|BAH29735.1|26S proteasome subunit ATPase 3, partial [Dicyema japonicum]	BAH29735.1
TRINITY_DN55972_c0_g1_i1	27 kda hemolymph protein	2055	1	7.64032e-07	0.5	0	-		-
TRINITY_DN3795_c0_g2_i1	27 kda hemolymph protein	796	1	0.0383292	0.46	0	-		-
TRINITY_DN15968_c0_g3_i1	27 kda hemolymph protein	944	1	2.66915e-08	0.46	0	-		-
TRINITY_DN20224_c0_g1_i1	27 kda hemolymph protein	1123	1	3.88446e-10	0.44	0	-		-
TRINITY_DN19149_c0_g1_i1	27 kda hemolymph protein	2198	1	2.86269e-10	0.44	0	-		-
TRINITY_DN3795_c0_g1_i1	27 kda hemolymph protein	857	1	0.395129	0.5	0	-		-
TRINITY_DN19149_c0_g2_i2	27 kda hemolymph protein	1845	1	0.000666636	0.44	0	-		-
TRINITY_DN19149_c0_g2_i1	27 kda hemolymph protein	1913	1	0.00069884	0.44	0	-		-
TRINITY_DN31409_c0_g1_i2	27 kda hemolymph protein	1025	1	0.0328567	0.36	0	-		-
TRINITY_DN31409_c0_g1_i1	27 kda hemolymph protein	1080	1	0.0568315	0.36	0	-		-
TRINITY_DN15968_c0_g2_i1	27 kda hemolymph protein	992	1	1.44092e-09	0.45	0	-		-
TRINITY_DN22470_c0_g1_i1	28s ribosomal protein mitochondrial	427	1	1.15894	0.54	5	F:structural constituent of ribosome; P:translation; C:ribonucleoprotein complex; C:ribosome; C:intracellular		F:GO:0003735; P:GO:0006412; C:GO:0030529; C:GO:0005840; C:GO:0005622	38.891	gi|62858843|ref|NP_001017066.1|28S ribosomal protein S15, mitochondrial [Xenopus tropicalis]	NP_001017066.1
TRINITY_DN46034_c0_g1_i1	28s ribosomal protein mitochondrial	244	1	0.279723	0.55	4	F:structural constituent of ribosome; P:translation; C:ribosome; C:intracellular		F:GO:0003735; P:GO:0006412; C:GO:0005840; C:GO:0005622	38.1206	gi|565322993|gb|ETE73620.1|28S ribosomal protein S14, mitochondrial [Ophiophagus hannah]	ETE73620.1
TRINITY_DN27600_c0_g1_i1	28s ribosomal protein mitochondrial	1353	1	1.94131e-54	0.7	0	-		-
TRINITY_DN25877_c0_g1_i1	28s ribosomal protein mitochondrial	1753	1	7.82681e-136	0.74	0	-		-
TRINITY_DN30948_c0_g1_i1	28s ribosomal protein mitochondrial	1114	1	1.80671e-129	0.74	0	-		-
TRINITY_DN44983_c0_g1_i1	28s ribosomal protein mitochondrial	236	1	3.0361e-09	0.82	0	-		-
TRINITY_DN39507_c0_g1_i1	28s ribosomal protein mitochondrial	288	1	1.29233e-08	0.65	0	-		-
TRINITY_DN22274_c0_g1_i1	28s ribosomal protein mitochondrial	620	1	4.92496e-49	0.94	0	-		-
TRINITY_DN10920_c0_g2_i1	28s ribosomal protein mitochondrial	378	1	7.36891e-19	0.58	0	-		-
TRINITY_DN31845_c0_g1_i1	28s ribosomal protein mitochondrial	1603	1	9.92592e-67	0.79	0	-		-
TRINITY_DN22274_c0_g1_i2	28s ribosomal protein mitochondrial	801	1	3.69377e-48	0.94	0	-		-
TRINITY_DN25440_c0_g1_i1	28s ribosomal protein mitochondrial	2301	1	2.02208e-86	0.81	0	-		-
TRINITY_DN40912_c1_g1_i1	28s ribosomal protein mitochondrial	1464	1	4.65934e-17	0.67	0	-		-
TRINITY_DN27745_c0_g1_i1	28s ribosomal protein mitochondrial	1331	1	6.18503e-162	0.75	0	-		-
TRINITY_DN10920_c0_g1_i1	28s ribosomal protein mitochondrial	397	1	2.79772e-17	0.75	0	-		-
TRINITY_DN50935_c0_g1_i1	28s ribosomal protein mitochondrial	1419	1	2.69524e-55	0.81	0	-		-
TRINITY_DN24879_c1_g1_i1	28s ribosomal protein mitochondrial	870	1	1.87024e-61	0.8	0	-		-
TRINITY_DN3718_c0_g1_i1	28s ribosomal protein mitochondrial	1242	1	2.75768e-69	0.83	0	-		-
TRINITY_DN35519_c1_g1_i1	28s ribosomal protein mitochondrial	498	1	3.60785	0.44	0	-		-
TRINITY_DN3517_c0_g2_i1	28s ribosomal protein mitochondrial	1050	1	6.69107e-104	0.81	0	-		-
TRINITY_DN63349_c0_g1_i1	28s ribosomal protein mitochondrial	579	1	0.00035555	0.72	0	-		-
TRINITY_DN35378_c0_g2_i1	28s ribosomal protein mitochondrial isoform x2	842	1	0.00107579	0.65	0	-		-
TRINITY_DN35378_c0_g5_i1	28s ribosomal protein mitochondrial isoform x2	844	1	0.000474088	0.65	0	-		-
TRINITY_DN27948_c0_g2_i1	28s ribosomal protein mitochondrial-like	392	1	1.14867e-18	0.95	0	-		-
TRINITY_DN33638_c0_g1_i1	28s ribosomal protein mitochondrial-like	2486	1	3.44829e-46	0.76	0	-		-
TRINITY_DN19050_c0_g2_i1	28s ribosomal protein mitochondrial-like	306	1	7.17709	0.65	0	-		-
TRINITY_DN33638_c0_g1_i2	28s ribosomal protein mitochondrial-like	2564	1	3.05615e-46	0.76	0	-		-
TRINITY_DN19050_c0_g1_i1	28s ribosomal protein mitochondrial-like	306	1	7.17709	0.65	0	-		-
TRINITY_DN33638_c0_g1_i3	28s ribosomal protein mitochondrial-like	2497	1	4.49457e-46	0.76	0	-		-
TRINITY_DN30838_c0_g1_i1	28s ribosomal protein partial	3346	1	8.79287e-69	0.86	0	-		-
TRINITY_DN30838_c0_g1_i2	28s ribosomal protein partial	3283	1	7.7649e-69	0.86	0	-		-
TRINITY_DN5054_c0_g1_i1	28s ribosomal protein s16	568	1	2.8565e-65	0.86	0	-		-
TRINITY_DN3405_c0_g1_i1	28s ribosomal protein s18a	865	1	3.03737e-62	0.74	0	-		-
TRINITY_DN3665_c0_g2_i1	28s ribosomal protein s18c	558	1	1.72656e-45	0.72	0	-		-
TRINITY_DN3665_c0_g1_i1	28s ribosomal protein s18c	558	1	3.28949e-46	0.72	0	-		-
TRINITY_DN17938_c0_g1_i1	28s ribosomal protein s22	1779	1	5.82535e-143	0.77	0	-		-
TRINITY_DN21326_c0_g1_i1	28s ribosomal protein s25	548	1	5.07299e-26	0.9	0	-		-
TRINITY_DN32755_c0_g1_i1	28s ribosomal protein s27	1715	1	3.66145e-150	0.74	0	-		-
TRINITY_DN50209_c0_g1_i1	28s ribosomal protein s27	213	1	2.50164e-26	0.84	0	-		-
TRINITY_DN58241_c0_g1_i1	2a protein	457	1	0.425093	0.49	8	F:RNA binding; F:nucleotidyltransferase activity; F:transferase activity; P:transcription, DNA-templated; F:nucleotide binding; P:viral RNA genome replication; F:RNA-directed RNA polymerase activity; P:transcription, RNA-templated		F:GO:0003723; F:GO:0016779; F:GO:0016740; P:GO:0006351; F:GO:0000166; P:GO:0039694; F:GO:0003968; P:GO:0001172	40.817	gi|261041429|ref|YP_003208108.1|2a protein [Melandrium yellow fleck virus]	YP_003208108.1,BAI40162.1
TRINITY_DN21876_c0_g1_i1	2-acylglycerol o-acyltransferase 1	336	1	4.70945e-15	0.86	0	-		-
TRINITY_DN15255_c0_g1_i1	2-alkenal reductase	245	1	6.43274	0.63	0	-		-
TRINITY_DN34762_c0_g10_i2	2-alkenal reductase (nadp(+)-dependent) isoform x2	476	1	0.111766	0.45	3	P:oxidation-reduction process; F:oxidoreductase activity; F:zinc ion binding		P:GO:0055114; F:GO:0016491; F:GO:0008270	41.9726	gi|586718411|ref|XP_006848303.1|PREDICTED: 2-alkenal reductase (NADP(+)-dependent) isoform X2 [Amborella trichopoda]	XP_006848303.1,XP_011624866.1,ERN09884.1
TRINITY_DN16377_c0_g1_i2	2-amino-3-carboxymuconate-6-semialdehyde decarboxylase	1760	1	0	0.84	0	-		-
TRINITY_DN15994_c0_g1_i1	2-amino-3-carboxymuconate-6-semialdehyde decarboxylase	995	1	2.06428e-107	0.77	0	-		-
TRINITY_DN16377_c0_g1_i1	2-amino-3-carboxymuconate-6-semialdehyde decarboxylase	1873	1	6.06223e-142	0.85	0	-		-
TRINITY_DN15994_c0_g2_i1	2-amino-3-carboxymuconate-6-semialdehyde decarboxylase	339	1	1.90537e-45	0.87	0	-		-
TRINITY_DN4573_c0_g1_i1	2-amino-3-ketobutyrate coenzyme a ligase	629	1	5.84245e-21	0.74	0	-		-
TRINITY_DN3444_c0_g2_i1	2-amino-3-ketobutyrate coenzyme a ligase (akb ligase) (glycine c-acetyltransferase)	363	1	7.27596	0.5	9	F:transferase activity; F:ligase activity; F:pyridoxal phosphate binding; F:glycine C-acetyltransferase activity; P:biosynthetic process; P:biotin biosynthetic process; F:8-amino-7-oxononanoate synthase activity; F:catalytic activity; F:transferase activity, transferring acyl groups		F:GO:0016740; F:GO:0016874; F:GO:0030170; F:GO:0008890; P:GO:0009058; P:GO:0009102; F:GO:0008710; F:GO:0003824; F:GO:0016746	36.1946	gi|258592005|emb|CBE68310.1|2-amino-3-ketobutyrate coenzyme A ligase (AKB ligase) (Glycine C-acetyltransferase) [Candidatus Methylomirabilis oxyfera]	CBE68310.1
TRINITY_DN4573_c0_g2_i1	2-amino-3-ketobutyrate coenzyme a mitochondrial isoform x2	532	1	3.14393	0.67	0	-		-
TRINITY_DN15567_c0_g2_i1	2-amino-3-ketobutyrate coenzyme a mitochondrial-like isoform x2	318	1	0.0731577	0.67	0	-		-
TRINITY_DN45074_c0_g1_i1	2-amino-3-ketobutyrate coenzyme a partial	274	1	6.09403e-25	0.87	0	-		-
TRINITY_DN44723_c0_g1_i1	2-amino-3-ketobutyrate coenzyme a partial	252	1	2.45285e-19	0.92	0	-		-
TRINITY_DN2650_c0_g1_i1	2-amino-3-ketobutyrate coenzyme a partial	2500	1	0	0.86	0	-		-
TRINITY_DN63931_c0_g1_i1	2-amino-3-ketobutyrate ligase	201	1	0.803935	0.63	5	P:biosynthetic process; F:transferase activity; P:metabolic process; F:catalytic activity; F:pyridoxal phosphate binding		P:GO:0009058; F:GO:0016740; P:GO:0008152; F:GO:0003824; F:GO:0030170	36.5798	gi|496519145|ref|WP_009227428.1|2-amino-3-ketobutyrate CoA ligase [Prevotella sp. oral taxon 299]	WP_009227428.1,EFC71580.1
TRINITY_DN10846_c0_g2_i1	2-amino-4-hydroxy-6-hydroxymethyldihydropteridine diphosphokinase	307	1	9.30479	0.42	0	-		-
TRINITY_DN22501_c0_g1_i1	2-amino-4-hydroxy-6-hydroxymethyldihydropteridine pyrophosphokinase	872	1	0.503899	0.5	0	-		-
TRINITY_DN50990_c0_g1_i1	2-aminoadipate transaminase	486	1	2.49864	0.52	0	-		-
TRINITY_DN13999_c0_g1_i1	2-aminoethanethiol dioxygenase	987	1	1.22635e-52	0.56	0	-		-
TRINITY_DN46999_c0_g1_i1	2-c-methyl-d-erythritol 4-phosphate cytidylyltransferase	287	1	0.689945	0.62	4	F:nucleotidyltransferase activity; F:transferase activity; P:metabolic process; F:2-C-methyl-D-erythritol 4-phosphate cytidylyltransferase activity		F:GO:0016779; F:GO:0016740; P:GO:0008152; F:GO:0050518	38.1206	gi|495326106|ref|WP_008050848.1|2-C-methyl-D-erythritol 4-phosphate cytidylyltransferase [Arthrospira sp. PCC 8005]	WP_008050848.1,CCE16562.1,CDM95210.1
TRINITY_DN42694_c0_g1_i1	2-c-methyl-d-erythritol 4-phosphate cytidylyltransferase	395	1	0.181688	0.47	0	-		-
TRINITY_DN46746_c0_g1_i1	2-c-methyl-d-erythritol 4-phosphate cytidylyltransferase	205	1	6.28901	0.53	0	-		-
TRINITY_DN45487_c0_g1_i1	2-c-methyl-d-erythritol 4-phosphate cytidylyltransferase	326	1	0.115686	0.47	0	-		-
TRINITY_DN45119_c0_g1_i1	2-c-methyl-d-erythritol -cyclodiphosphate synthase	282	1	4.64432	0.46	6	F:metal ion binding; P:isoprenoid biosynthetic process; P:isopentenyl diphosphate biosynthetic process, methylerythritol 4-phosphate pathway; P:terpenoid biosynthetic process; F:lyase activity; F:2-C-methyl-D-erythritol 2,4-cyclodiphosphate synthase activity		F:GO:0046872; P:GO:0008299; P:GO:0019288; P:GO:0016114; F:GO:0016829; F:GO:0008685	35.4242	gi|499339814|ref|WP_011029522.1|2-C-methyl-D-erythritol 2,4-cyclodiphosphate synthase [Streptomyces coelicolor]	WP_011029522.1,NP_628408.1,Q9L0Q7.1,CAB77328.1
TRINITY_DN4381_c0_g1_i1	2-c-methyl-d-erythritol -cyclodiphosphate synthase	449	1	2.53187	0.5	0	-		-
TRINITY_DN62519_c0_g1_i1	2-c-methyl-d-erythritol -cyclodiphosphate synthase	292	1	0.0586623	0.5	0	-		-
TRINITY_DN57166_c0_g1_i1	2-dehydro-3-deoxy-6-phosphogalactonate aldolase	216	1	2.68915	0.49	0	-		-
TRINITY_DN3865_c0_g2_i1	2-dehydro-3-deoxy-6-phosphogalactonate aldolase	321	1	1.90396	0.69	0	-		-
TRINITY_DN32160_c1_g2_i1	2-dehydro-3-deoxygluconokinase [Lactobacillus brevis]	392	1	8.95058	0.59	0	-		-
TRINITY_DN38003_c0_g1_i1	2-dehydro-3-deoxygluconokinase [Oceanicola sp. S124]	389	1	1.64531	0.41	0	-		-
TRINITY_DN62142_c0_g1_i1	2-dehydro-3-deoxygluconokinase [Prevotella copri]	211	1	4.93475	0.6	3	F:kinase activity; P:phosphorylation; F:transferase activity		F:GO:0016301; P:GO:0016310; F:GO:0016740	34.6538	gi|493903439|ref|WP_006849162.1|2-dehydro-3-deoxygluconokinase [Prevotella copri]	WP_006849162.1,EFB34083.1
TRINITY_DN9699_c0_g1_i1	2-dehydro-3-deoxy-phosphogluconate aldolase	305	1	0.90645	0.46	0	-		-
TRINITY_DN30022_c0_g1_i2	2-dehydropantoate 2-reductase	236	1	1.63021	0.53	0	-		-
TRINITY_DN4909_c0_g2_i1	2-dehydropantoate 2-reductase	227	1	0.618781	0.47	0	-		-
TRINITY_DN19316_c0_g1_i1	2-dehydropantoate 2-reductase	801	1	2.41557	0.55	0	-		-
TRINITY_DN41809_c0_g1_i1	2-dehydropantoate 2-reductase	458	1	2.40744	0.51	0	-		-
TRINITY_DN11989_c0_g1_i2	2-dehydropantoate 2-reductase	468	1	7.67967	0.5	0	-		-
TRINITY_DN41850_c0_g1_i1	2-dehydropantoate 2-reductase	334	1	1.41131	0.49	0	-		-
TRINITY_DN26045_c0_g1_i1	2-deoxyribose-5-phosphate aldolase	368	1	1.67832	0.55	0	-		-
TRINITY_DN54373_c0_g1_i1	2-desacetyl-2-hydroxyethyl bacteriochlorophyllide a dehydrogenase	603	1	4.98323	0.49	5	P:oxidation-reduction process; F:oxidoreductase activity; F:zinc ion binding; F:2-desacetyl-2-hydroxyethyl bacteriochlorophyllide a dehydrogenase activity; P:bacteriochlorophyll biosynthetic process		P:GO:0055114; F:GO:0016491; F:GO:0008270; F:GO:0036354; P:GO:0030494	38.1206	gi|562789294|gb|ESW61382.1|2-desacetyl-2-hydroxyethyl bacteriochlorophyllide A dehydrogenase [Rhodobacter sp. CACIA14H1]	ESW61382.1
TRINITY_DN33978_c0_g1_i1	2-domain hemoglobin	1478	1	5.06773e-10	0.51	8	F:oxygen transporter activity; F:heme binding; C:hemoglobin complex; F:oxygen binding; P:oxygen transport; F:iron ion binding; C:extracellular region; P:transport		F:GO:0005344; F:GO:0020037; C:GO:0005833; F:GO:0019825; P:GO:0015671; F:GO:0005506; C:GO:0005576; P:GO:0006810	63.5438	gi|322229317|dbj|BAJ72724.1|2-domain hemoglobin [Daphnia magna]	BAJ72724.1
TRINITY_DN33978_c0_g1_i20	2-domain hemoglobin	1468	1	5.02334e-10	0.51	8	F:oxygen transporter activity; F:heme binding; C:hemoglobin complex; F:oxygen binding; P:oxygen transport; F:iron ion binding; C:extracellular region; P:transport		F:GO:0005344; F:GO:0020037; C:GO:0005833; F:GO:0019825; P:GO:0015671; F:GO:0005506; C:GO:0005576; P:GO:0006810	63.5438	gi|322229317|dbj|BAJ72724.1|2-domain hemoglobin [Daphnia magna]	BAJ72724.1
TRINITY_DN15718_c0_g1_i1	2-domain hemoglobin	1008	1	2.94107e-86	0.75	2	F:binding; P:transport	-	F:GO:0005488; P:GO:0006810	272.322	gi|322229318|dbj|BAJ72725.1|2-domain hemoglobin [Daphnia magna]	BAJ72725.1
TRINITY_DN35927_c2_g8_i5	2-domain hemoglobin	452	1	2.53791e-34	0.67	1	F:binding	-	F:GO:0005488	131.339	gi|322229317|dbj|BAJ72724.1|2-domain hemoglobin [Daphnia magna]	BAJ72724.1
TRINITY_DN35927_c2_g6_i5	2-domain hemoglobin	1154	1	2.45866e-94	0.69	1	F:binding	-	F:GO:0005488	295.049	gi|4589706|dbj|BAA76871.1|hemoglobin [Daphnia magna]	BAA76871.1,BAA76875.1,BAJ72726.1
TRINITY_DN35927_c2_g6_i3	2-domain hemoglobin	982	1	3.02422e-96	0.69	1	F:binding	-	F:GO:0005488	297.36	gi|4589706|dbj|BAA76871.1|hemoglobin [Daphnia magna]	BAA76871.1,BAA76875.1,BAJ72726.1
TRINITY_DN46223_c0_g1_i1	2-domain hemoglobin protein partial	438	1	7.53185e-40	0.66	1	F:binding	-	F:GO:0005488	143.28	gi|20513980|gb|AAM22888.1|2-domain hemoglobin protein subunit, partial [Daphnia exilis]	AAM22888.1
TRINITY_DN35335_c1_g3_i1	2-domain hemoglobin protein partial	203	1	2.16999e-15	0.71	1	F:binding	-	F:GO:0005488	76.6406	gi|20513976|gb|AAM22886.1|2-domain hemoglobin protein subunit, partial [Daphnia spinulata]	AAM22886.1
TRINITY_DN22203_c0_g2_i1	2-haloalkanoic acid dehalogenase	618	1	1.40801	0.54	0	-		-
TRINITY_DN1662_c0_g1_i1	2-hydroxyacid dehydrogenase	361	1	2.22978	0.52	0	-		-
TRINITY_DN33442_c0_g1_i3	2-hydroxyacid dehydrogenase	445	1	9.68047	0.58	0	-		-
TRINITY_DN1662_c0_g2_i1	2-hydroxyacid dehydrogenase	329	1	1.33506	0.52	0	-		-
TRINITY_DN51461_c0_g1_i1	2-hydroxyacid dehydrogenase	366	1	0.00156224	0.5	0	-		-
TRINITY_DN43312_c0_g1_i1	2-hydroxyacid dehydrogenase hi_1556	509	1	3.75417	0.47	0	-		-
TRINITY_DN10699_c0_g1_i1	2-hydroxy-acid oxidase	285	1	5.24725	0.51	6	P:oxidation-reduction process; F:oxidoreductase activity; F:UDP-N-acetylmuramate dehydrogenase activity; F:catalytic activity; F:oxidoreductase activity, acting on CH-OH group of donors; F:flavin adenine dinucleotide binding		P:GO:0055114; F:GO:0016491; F:GO:0008762; F:GO:0003824; F:GO:0016614; F:GO:0050660	35.8094	gi|506374090|ref|WP_015893809.1|2-hydroxy-acid oxidase [Brevibacillus brevis]	WP_015893809.1,BAH46623.1
TRINITY_DN21358_c0_g1_i1	2-hydroxyacylsphingosine 1-beta-galactosyltransferase	483	1	1.00603e-14	0.9	0	-		-
TRINITY_DN41123_c0_g1_i1	2-hydroxyacylsphingosine 1-beta-galactosyltransferase	966	1	1.4677e-12	0.73	0	-		-
TRINITY_DN43511_c0_g1_i1	2-hydroxycyclohexanecarboxyl- dehydrogenase	288	1	2.10919	0.5	0	-		-
TRINITY_DN56444_c0_g1_i1	2-hydroxyglutaryl- dehydratase	634	1	7.60089	0.44	0	-		-
TRINITY_DN16150_c0_g1_i1	2-hydroxyglutaryl- dehydratase	217	1	1.34368	0.5	0	-		-
TRINITY_DN42905_c0_g1_i1	2-hydroxyhepta- -diene- -dioate isomerase	362	1	3.65918	0.44	0	-		-
TRINITY_DN20458_c0_g1_i2	2-hydroxymuconate semialdehyde hydrolase	457	1	0.372447	0.43	0	-		-
TRINITY_DN20458_c0_g1_i1	2-hydroxymuconate semialdehyde hydrolase	540	1	0.598058	0.43	0	-		-
TRINITY_DN20458_c0_g1_i3	2-hydroxymuconate semialdehyde hydrolase	523	1	0.961708	0.43	0	-		-
TRINITY_DN32493_c0_g1_i4	2-hydroxymuconic semialdehyde dehydrogenase	246	1	3.53379	0.48	0	-		-
TRINITY_DN6637_c0_g1_i1	2-hydroxymuconic semialdehyde hydrolase	230	1	5.05089	0.45	2	F:hydrolase activity; P:metabolic process		F:GO:0016787; P:GO:0008152	35.039	gi|351595351|gb|AEQ53688.1|2-hydroxymuconic semialdehyde hydrolase [Pelagibacterium halotolerans B2]	AEQ53688.1
TRINITY_DN43914_c0_g1_i1	2-isopropylmalate synthase	222	1	6.93186	0.62	0	-		-
TRINITY_DN37488_c0_g1_i1	2-isopropylmalate synthase	426	1	0.310403	0.55	0	-		-
TRINITY_DN51133_c0_g1_i1	2-isopropylmalate synthase	434	1	0.535227	0.63	0	-		-
TRINITY_DN52914_c0_g1_i1	2-isopropylmalate synthase	270	1	0.34419	0.56	0	-		-
TRINITY_DN10271_c0_g1_i1	2-methylcitrate dehydratase	202	1	0.10607	0.52	0	-		-
TRINITY_DN50752_c0_g1_i1	2-methylcitrate dehydratase	213	1	4.30608	0.48	0	-		-
TRINITY_DN56156_c0_g1_i1	2-methylcitrate dehydratase	307	1	1.67679e-28	0.73	0	-		-
TRINITY_DN52676_c0_g1_i1	2-methylcitrate dehydratase	264	1	5.6726	0.53	0	-		-
TRINITY_DN11215_c0_g2_i1	2-nitropropane dioxygenase	257	1	7.01164	0.62	4	P:oxidation-reduction process; F:nitronate monooxygenase activity; F:catalytic activity; F:dioxygenase activity		P:GO:0055114; F:GO:0018580; F:GO:0003824; F:GO:0051213	35.039	gi|564592553|gb|ETC89004.1|2-nitropropane dioxygenase [Xanthomonas hortorum pv. carotae str. M081]	ETC89004.1
TRINITY_DN12228_c0_g1_i1	2-nitropropane dioxygenase	405	1	5.85052	0.48	0	-		-
TRINITY_DN47129_c0_g1_i1	2-nitropropane dioxygenase	263	1	5.04911	0.61	0	-		-
TRINITY_DN22296_c0_g1_i4	2-octaprenyl-3-methyl-6-methoxy- -benzoquinol hydroxylase	1116	1	0.953895	0.56	0	-		-
TRINITY_DN65111_c0_g1_i1	2-octaprenyl-3-methyl-6-methoxy- -benzoquinol hydroxylase	205	1	9.14669e-39	1	0	-		-
TRINITY_DN22296_c0_g1_i5	2-octaprenyl-3-methyl-6-methoxy- -benzoquinol hydroxylase	1051	1	0.864839	0.56	0	-		-
TRINITY_DN33678_c1_g6_i3	2-octaprenyl-3-methyl-6-methoxy- -benzoquinol oxygenase	211	1	2.62988	0.59	6	P:oxidation-reduction process; F:oxidoreductase activity; P:metabolic process; P:ubiquinone biosynthetic process; F:oxidoreductase activity, acting on paired donors, with incorporation or reduction of molecular oxygen, NAD(P)H as one donor, and incorporation of one atom of oxygen; F:flavin adenine dinucleotide binding		P:GO:0055114; F:GO:0016491; P:GO:0008152; P:GO:0006744; F:GO:0016709; F:GO:0050660	35.4242	gi|299070573|emb|CBJ41868.1|2-octaprenyl-3-methyl-6-methoxy-1,4-benzoquinol oxygenase [Ralstonia solanacearum CFBP2957]	CBJ41868.1
TRINITY_DN43218_c0_g1_i1	2-octaprenyl-6-methoxyphenol partial	285	1	0.789095	0.48	6	P:oxidation-reduction process; F:oxidoreductase activity; P:metabolic process; P:ubiquinone biosynthetic process; F:oxidoreductase activity, acting on paired donors, with incorporation or reduction of molecular oxygen, NAD(P)H as one donor, and incorporation of one atom of oxygen; F:flavin adenine dinucleotide binding		P:GO:0055114; F:GO:0016491; P:GO:0008152; P:GO:0006744; F:GO:0016709; F:GO:0050660	37.7354	gi|494061649|ref|WP_007003729.1|2-octaprenyl-6-methoxyphenol hydroxylase, partial [Roseomonas cervicalis]	WP_007003729.1,EFH13112.1
TRINITY_DN22882_c0_g1_i2	2-octaprenyl-6-methoxyphenyl hydroxylase	435	1	0.297972	0.58	0	-		-
TRINITY_DN973_c0_g1_i1	2og-fe oxygenase	482	1	2.81105	0.53	7	P:oxidation-reduction process; F:oxidoreductase activity, acting on paired donors, with incorporation or reduction of molecular oxygen, 2-oxoglutarate as one donor, and incorporation of one atom each of oxygen into both donors; F:isopenicillin-N synthase activity; F:oxidoreductase activity; C:membrane; P:transport; F:transporter activity		P:GO:0055114; F:GO:0016706; F:GO:0016216; F:GO:0016491; C:GO:0016020; P:GO:0006810; F:GO:0005215	38.5058	gi|583961192|emb|CDM60615.1|2OG-Fe(II) oxygenase (plasmid) [Rhizobium favelukesii]	CDM60615.1
TRINITY_DN51064_c0_g1_i1	2og-fe oxygenase	363	1	5.61588	0.53	6	P:oxidation-reduction process; F:oxidoreductase activity, acting on paired donors, with incorporation or reduction of molecular oxygen, 2-oxoglutarate as one donor, and incorporation of one atom each of oxygen into both donors; F:oxidoreductase activity, acting on paired donors, with incorporation or reduction of molecular oxygen; F:oxidoreductase activity; F:iron ion binding; F:L-ascorbic acid b…		P:GO:0055114; F:GO:0016706; F:GO:0016705; F:GO:0016491; F:GO:0005506; F:GO:0031418	36.1946	gi|503426147|ref|WP_013660808.1|2OG-Fe(II) oxygenase [Marinomonas mediterranea]	WP_013660808.1,ADZ90903.1
TRINITY_DN30814_c0_g1_i1	2og-fe oxygenase	452	1	0.298417	0.5	0	-		-
TRINITY_DN61933_c0_g1_i1	2og-fe oxygenase	240	1	8.81832	0.52	0	-		-
TRINITY_DN36336_c0_g1_i1	2og-fe oxygenase	238	1	3.19638	0.62	0	-		-
TRINITY_DN25817_c0_g1_i2	2-oxo-4-hydroxy-4-carboxy-5-ureidoimidazoline decarboxylase	1454	1	9.37277e-74	0.8	0	-		-
TRINITY_DN25817_c0_g1_i1	2-oxo-4-hydroxy-4-carboxy-5-ureidoimidazoline decarboxylase	1428	1	8.56071e-55	0.82	0	-		-
TRINITY_DN37090_c0_g1_i1	2-oxoacid:acceptor oxidoreductase	278	1	6.34	0.58	0	-		-
TRINITY_DN10986_c0_g1_i1	2-oxoglutarate and fe -dependent oxygenase superfamily	250	1	0.876487	0.57	0	-		-
TRINITY_DN50044_c0_g1_i1	2-oxoglutarate and fe -dependent oxygenase superfamily protein	426	1	1.94386	0.56	0	-		-
TRINITY_DN32860_c0_g1_i4	2-oxoglutarate and iron-dependent oxygenase domain-containing partial	1247	1	1.00677e-75	0.62	0	-		-
TRINITY_DN31455_c0_g1_i2	2-oxoglutarate and iron-dependent oxygenase domain-containing protein	1745	1	0	0.75	0	-		-
TRINITY_DN31455_c0_g1_i1	2-oxoglutarate and iron-dependent oxygenase domain-containing protein	1799	1	0	0.72	0	-		-
TRINITY_DN29959_c0_g2_i2	2-oxoglutarate and iron-dependent oxygenase domain-containing protein 2	1245	1	3.5243e-138	0.74	0	-		-
TRINITY_DN25990_c0_g1_i2	2-oxoglutarate dehydrogenase	384	1	0.0013379	0.5	0	-		-
TRINITY_DN25990_c0_g1_i1	2-oxoglutarate dehydrogenase	384	1	0.00236033	0.5	0	-		-
TRINITY_DN44151_c0_g1_i1	2-oxoglutarate dehydrogenase e1 component	252	1	1.03492e-49	1	6	F:oxoglutarate dehydrogenase (succinyl-transferring) activity; P:tricarboxylic acid cycle; F:thiamine pyrophosphate binding; P:lysine catabolic process; P:tryptophan metabolic process; C:oxoglutarate dehydrogenase complex	(1.2) Acting on the aldehyde or oxo group of donors	F:GO:0004591; P:GO:0006099; F:GO:0030976; P:GO:0006554; P:GO:0006568; C:GO:0045252	176.792	gi|501510426|ref|WP_012518363.1|2-oxoglutarate dehydrogenase subunit E1 [Alteromonas mediterranea]	WP_012518363.1,AEA98037.1,AGP78037.1,AGP85624.1,AGP89762.1,AGP93630.1
TRINITY_DN34129_c0_g1_i1	2-oxoglutarate dehydrogenase e1 component	341	1	2.43605	0.53	0	-		-
TRINITY_DN659_c0_g1_i1	2-oxoglutarate dehydrogenase e1 partial	246	1	0.00093457	0.57	0	-		-
TRINITY_DN37955_c0_g1_i1	2-oxoglutarate dehydrogenase subunit e1	261	1	7.90762	0.52	0	-		-
TRINITY_DN48438_c0_g1_i1	2-oxoglutarate e2 dihydrolipoamide succinyltransferase	241	1	2.34384e-16	0.75	0	-		-
TRINITY_DN41160_c0_g1_i1	2-oxoglutarate malate carrier protein	329	1	8.88931e-12	0.53	3	C:integral component of membrane; C:membrane; P:transport		C:GO:0016021; C:GO:0016020; P:GO:0006810	69.3218	gi|118369562|ref|XP_001017985.1|2-oxoglutarate/malate carrier protein [Tetrahymena thermophila SB210]	XP_001017985.1,EAR97740.1
TRINITY_DN31598_c1_g1_i2	2-oxoglutarate mitochondrial	729	1	0.000234215	0.75	0	-		-
TRINITY_DN31598_c1_g1_i3	2-oxoglutarate mitochondrial	4099	1	0	0.9	0	-		-
TRINITY_DN6206_c0_g1_i1	2-oxoglutarate receptor 1	1218	1	6.11575e-110	0.73	0	-		-
TRINITY_DN6206_c0_g2_i1	2-oxoglutarate receptor 1	1199	1	4.97181e-110	0.73	0	-		-
TRINITY_DN45608_c0_g1_i1	2-oxoisovalerate dehydrogenase	212	1	5.31818e-14	1	0	-		-
TRINITY_DN20402_c0_g1_i1	2-oxoisovalerate dehydrogenase	1296	1	8.73184	0.68	0	-		-
TRINITY_DN17656_c0_g1_i1	2-oxoisovalerate dehydrogenase subunit mitochondrial	307	1	0.00023754	0.69	2	P:metabolic process; F:catalytic activity		P:GO:0008152; F:GO:0003824	40.4318	gi|405966606|gb|EKC31869.1|2-oxoisovalerate dehydrogenase subunit beta, mitochondrial [Crassostrea gigas]	EKC31869.1
TRINITY_DN5233_c0_g1_i1	2-oxoisovalerate dehydrogenase subunit mitochondrial	381	1	4.26819e-14	0.77	0	-		-
TRINITY_DN16261_c0_g1_i1	2-oxoisovalerate dehydrogenase subunit mitochondrial	3217	1	0	0.96	0	-		-
TRINITY_DN23573_c0_g1_i1	2-oxoisovalerate dehydrogenase subunit mitochondrial-like	696	1	1.00013e-79	0.92	0	-		-
TRINITY_DN50390_c0_g1_i1	2-phospho-l-lactate guanylyltransferase	262	1	0.263505	0.64	0	-		-
TRINITY_DN21753_c0_g1_i1	2-phospho-l-lactate guanylyltransferase	599	1	2.25585	0.58	0	-		-
TRINITY_DN21753_c0_g2_i1	2-phospho-l-lactate guanylyltransferase	599	1	2.23343	0.58	0	-		-
TRINITY_DN36141_c0_g1_i1	2-phospho-l-lactate transferase	213	1	1.50236e-42	1	0	-		-
TRINITY_DN31621_c0_g1_i2	2-phosphoxylose phosphatase 1	2404	1	1.24061e-103	0.6	0	-		-
TRINITY_DN27777_c0_g1_i1	2-polyprenyl-6-methoxyphenol hydroxylase	229	1	6.70775	0.57	0	-		-
TRINITY_DN1913_c0_g2_i1	2-polyprenylphenol hydroxylase	210	1	0.255826	0.5	5	P:oxidation-reduction process; P:pyrimidine nucleotide biosynthetic process; F:oxidoreductase activity; F:2 iron, 2 sulfur cluster binding; F:flavin adenine dinucleotide binding		P:GO:0055114; P:GO:0006221; F:GO:0016491; F:GO:0051537; F:GO:0050660	38.1206	gi|550999471|ref|WP_022744180.1|2-polyprenylphenol hydroxylase [Clostridium saccharobutylicum]	WP_022744180.1,AGX41893.1
TRINITY_DN51898_c0_g1_i1	2-succinyl-5-enolpyruvyl-6-hydroxy-3-cyclohexene-1-carboxylate synthase	397	1	2.69684	0.56	7	F:2-succinyl-5-enolpyruvyl-6-hydroxy-3-cyclohexene-1-carboxylic-acid synthase activity; F:metal ion binding; P:menaquinone biosynthetic process; F:thiamine pyrophosphate binding; F:transferase activity; F:catalytic activity; F:lyase activity		F:GO:0070204; F:GO:0046872; P:GO:0009234; F:GO:0030976; F:GO:0016740; F:GO:0003824; F:GO:0016829	37.7354	gi|504010289|ref|WP_014244283.1|2-succinyl-5-enolpyruvyl-6-hydroxy-3-cyclohexene-1-carboxylate synthase [Halobacteriovorax marinus]	WP_014244283.1,CBW26502.1
TRINITY_DN54339_c0_g1_i1	2-succinyl-5-enolpyruvyl-6-hydroxy-3-cyclohexene-1-carboxylic-acid synthase	257	1	6.3187	0.56	0	-		-
TRINITY_DN46240_c0_g1_i1	2-succinyl-6-hydroxy- -cyclohexadiene-1-carboxylate partial	225	1	0.293119	0.54	0	-		-
TRINITY_DN7795_c0_g2_i1	2-succinylbenzoate- ligase	246	1	0.463888	0.39	5	F:ligase activity; P:menaquinone biosynthetic process; P:metabolic process; F:catalytic activity; F:o-succinylbenzoate-CoA ligase activity		F:GO:0016874; P:GO:0009234; P:GO:0008152; F:GO:0003824; F:GO:0008756	38.1206	gi|504369006|ref|WP_014556108.1|2-succinylbenzoate-CoA ligase [Haloquadratum walsbyi]	WP_014556108.1,CCC40498.1
TRINITY_DN38610_c0_g1_i1	2-succinylbenzoate- ligase	253	1	5.04426	0.47	4	F:ligase activity; P:metabolic process; F:catalytic activity; F:o-succinylbenzoate-CoA ligase activity		F:GO:0016874; P:GO:0008152; F:GO:0003824; F:GO:0008756	35.4242	gi|499753256|ref|WP_011433990.1|2-succinylbenzoate-CoA ligase [Synechococcus sp. JA-2-3B'a(2-13)]	WP_011433990.1,ABD03361.1
TRINITY_DN14792_c0_g2_i1	2-succinylbenzoate- ligase	209	1	4.43867	0.53	0	-		-
TRINITY_DN48542_c0_g1_i1	3- - -alpha-trihydroxy-5-beta-cholest-24-enoyl- hydratase	420	1	6.10107e-36	0.66	0	-		-
TRINITY_DN20258_c0_g1_i1	3 (2 ) -bisphosphate nucleotidase	389	1	1.63622	0.51	1	P:phosphatidylinositol phosphorylation		P:GO:0046854	38.1206	gi|918932803|ref|WP_052637136.1|3'(2'),5'-bisphosphate nucleotidase CysQ [Rhizobium sp. NT-26]	WP_052637136.1,CCF18150.1
TRINITY_DN463_c0_g1_i1	3 (2 ) -bisphosphate nucleotidase	242	1	0.721238	0.64	0	-		-
TRINITY_DN61767_c0_g1_i1	3 (2 ) -bisphosphate nucleotidase	533	1	0.843081	0.47	0	-		-
TRINITY_DN463_c0_g2_i1	3 (2 ) -bisphosphate nucleotidase	242	1	5.34943	0.61	0	-		-
TRINITY_DN16312_c0_g1_i1	3 (2 ) -bisphosphate nucleotidase	1824	1	0.383253	0.53	0	-		-
TRINITY_DN41203_c0_g1_i1	3 5 -cyclic nucleotide phosphodiesterase domain-containing protein	617	1	8.65241	0.42	7	F:metal ion binding; F:hydrolase activity; P:metabolic process; F:phosphoric diester hydrolase activity; F:catalytic activity; P:signal transduction; F:3',5'-cyclic-nucleotide phosphodiesterase activity		F:GO:0046872; F:GO:0016787; P:GO:0008152; F:GO:0008081; F:GO:0003824; P:GO:0007165; F:GO:0004114	38.1206	gi|237838947|ref|XP_002368771.1|phosphodiesterase, putative [Toxoplasma gondii ME49]	XP_002368771.1,EPT27622.1,KYF45532.1
TRINITY_DN42167_c0_g1_i1	3 -5 exonuclease	267	1	1.50904	0.47	0	-		-
TRINITY_DN18122_c0_g2_i2	3 -5 exonuclease	261	1	4.97905	0.58	0	-		-
TRINITY_DN52133_c0_g1_i1	3 -5 exonuclease	410	1	7.72439	0.44	0	-		-
TRINITY_DN28587_c0_g1_i2	3 beta-hydroxysteroid dehydrogenase delta 5--	598	1	0.360613	0.66	0	-		-
TRINITY_DN32701_c0_g1_i1	3 beta-hydroxysteroid dehydrogenase type	1539	1	3.14242e-169	0.79	0	-		-
TRINITY_DN30687_c0_g1_i2	3 -bisphosphate nucleotidase 1	518	1	1.46263e-34	0.81	0	-		-
TRINITY_DN4934_c0_g1_i1	3 -cyclic amp phosphodiesterase	353	1	2.98634	0.53	0	-		-
TRINITY_DN15895_c0_g2_i1	3 -cyclic-nucleotide phosphodiesterase	495	1	6.96111	0.5	6	F:metal ion binding; F:hydrolase activity; P:metabolic process; F:nucleotide binding; F:3',5'-cyclic-AMP phosphodiesterase activity; F:3',5'-cyclic-nucleotide phosphodiesterase activity		F:GO:0046872; F:GO:0016787; P:GO:0008152; F:GO:0000166; F:GO:0004115; F:GO:0004114	36.965	gi|486373440|gb|EOD80305.1|3',5'-cyclic-nucleotide phosphodiesterase [Grimontia indica]	EOD80305.1
TRINITY_DN15895_c0_g1_i1	3 -cyclic-nucleotide phosphodiesterase	518	1	7.83298	0.5	6	F:metal ion binding; F:hydrolase activity; P:metabolic process; F:nucleotide binding; F:3',5'-cyclic-AMP phosphodiesterase activity; F:3',5'-cyclic-nucleotide phosphodiesterase activity		F:GO:0046872; F:GO:0016787; P:GO:0008152; F:GO:0000166; F:GO:0004115; F:GO:0004114	36.965	gi|486373440|gb|EOD80305.1|3',5'-cyclic-nucleotide phosphodiesterase [Grimontia indica]	EOD80305.1
TRINITY_DN62979_c0_g1_i1	3 -cyclic-nucleotide phosphodiesterase	220	1	6.60236	0.6	0	-		-
TRINITY_DN63419_c0_g1_i1	3 -phosphoadenosine 5 -phosphosulfate synthase 2 alpha	298	1	3.80683e-47	0.94	6	F:sulfate adenylyltransferase (ATP) activity; P:phosphorylation; F:ATP binding; P:sulfate assimilation; F:adenylylsulfate kinase activity; P:purine nucleobase metabolic process	(2.7) Transferring phosphorus-containing groups; (2.7) Transferring phosphorus-containing groups; (2.7) Transferring phosphorus-containing groups	F:GO:0004781; P:GO:0016310; F:GO:0005524; P:GO:0000103; F:GO:0004020; P:GO:0006144	167.548	gi|321470325|gb|EFX81302.1|3'-phosphoadenosine 5'-phosphosulfate synthase 2 alpha [Daphnia pulex]	EFX81302.1
TRINITY_DN63419_c1_g1_i1	3 -phosphoadenosine 5 -phosphosulfate synthase 2 alpha	301	1	1.46863e-26	0.64	5	F:sulfate adenylyltransferase (ATP) activity; F:ATP binding; P:phosphorylation; F:adenylylsulfate kinase activity; P:sulfate assimilation		F:GO:0004781; F:GO:0005524; P:GO:0016310; F:GO:0004020; P:GO:0000103	111.309	gi|321470325|gb|EFX81302.1|3'-phosphoadenosine 5'-phosphosulfate synthase 2 alpha [Daphnia pulex]	EFX81302.1
TRINITY_DN64237_c0_g1_i1	3-(3-hydroxyphenyl)propionate hydroxylase	247	1	8.0686	0.59	0	-		-
TRINITY_DN45202_c0_g1_i1	30s ribosomal protein partial	354	1	0.182642	0.5	0	-		-
TRINITY_DN38078_c0_g1_i1	30s ribosomal protein partial	221	1	1.18706e-37	0.97	0	-		-
TRINITY_DN53921_c0_g1_i1	30s ribosomal protein s1	258	1	0.00362933	0.92	5	F:structural constituent of ribosome; F:RNA binding; P:translation; C:ribonucleoprotein complex; C:ribosome		F:GO:0003735; F:GO:0003723; P:GO:0006412; C:GO:0030529; C:GO:0005840	44.2838	gi|145570886|gb|ABP79992.1|30S ribosomal protein S1 [Pseudomonas stutzeri A1501]	ABP79992.1
TRINITY_DN45334_c0_g1_i1	30s ribosomal protein s1	213	1	1.01931e-20	1	0	-		-
TRINITY_DN46141_c0_g1_i1	30s ribosomal protein s1	408	1	5.43183e-72	0.92	0	-		-
TRINITY_DN59933_c0_g1_i1	30s ribosomal protein s1	260	1	1.18722e-48	1	0	-		-
TRINITY_DN58355_c0_g1_i1	30s ribosomal protein s1	247	1	1.72351e-49	1	0	-		-
TRINITY_DN43803_c0_g1_i1	30s ribosomal protein s1	288	1	6.25126e-55	1	0	-		-
TRINITY_DN53369_c0_g1_i1	30s ribosomal protein s1	271	1	3.91512e-52	1	0	-		-
TRINITY_DN864_c0_g1_i1	30s ribosomal protein s1	217	1	4.87557e-38	1	0	-		-
TRINITY_DN58541_c0_g1_i1	30s ribosomal protein s1	306	1	4.89606e-56	0.95	0	-		-
TRINITY_DN17653_c0_g1_i1	30s ribosomal protein s1	219	1	1.00455e-39	1	0	-		-
TRINITY_DN56944_c0_g1_i1	30s ribosomal protein s1	217	1	1.56544e-37	1	0	-		-
TRINITY_DN44148_c0_g1_i1	30s ribosomal protein s11	299	1	1.70315e-29	1	5	C:ribosome; F:structural constituent of ribosome; P:translation; F:rRNA binding; P:ribosome biogenesis	-	C:GO:0005840; F:GO:0003735; P:GO:0006412; F:GO:0019843; P:GO:0042254	110.923	gi|501511278|ref|WP_012519215.1|MULTISPECIES: 30S ribosomal protein S11 [Alteromonas]	WP_012519215.1,B4RT51.1,AEA98923.1,AFS38855.1,AFT76065.1,AFT79839.1,AFT96897.1,AFV87058.1,AGP79297.1,AGP83307.1,AGP87138.1,AGP91275.1,AGP95087.1,AGP99073.1,AGQ03246.1,EXF51365.1,KHT54544.1,KHT54960.1,KHT58637.1,AMJ79976.1,AMJ84131.1,AMJ99793.1,AMN13178.1
TRINITY_DN38331_c0_g1_i1	30s ribosomal protein s11	255	1	3.27811e-34	0.98	0	-		-
TRINITY_DN31589_c0_g2_i1	30s ribosomal protein s11	713	1	9.40502	0.42	0	-		-
TRINITY_DN13278_c0_g1_i1	30s ribosomal protein s12	742	1	4.19116e-83	1	6	F:structural constituent of ribosome; C:small ribosomal subunit; P:translation; F:rRNA binding; F:tRNA binding; P:ribosome biogenesis	-	F:GO:0003735; C:GO:0015935; P:GO:0006412; F:GO:0019843; F:GO:0000049; P:GO:0042254	252.677	gi|504763935|ref|WP_014951037.1|MULTISPECIES: 30S ribosomal protein S12 [Alteromonas]	WP_014951037.1,AFS38996.1,AFT76209.1,AFT79971.1,AFT97042.1,AFV87182.1,AGP79406.1,AGP83432.1,AGP87264.1,AGP91401.1,AGP95202.1,AGP99198.1,AGQ03365.1,AGV53911.1,KHT48835.1,KHT55526.1,KHT58784.1,AMJ80090.1,AMJ84245.1,AMJ99917.1,AMN13311.1
TRINITY_DN29327_c0_g2_i1	30s ribosomal protein s12	286	1	6.60118e-60	0.98	0	-		-
TRINITY_DN50282_c0_g1_i1	30s ribosomal protein s13	375	1	3.49573e-48	1	6	C:ribosome; F:structural constituent of ribosome; P:translation; F:rRNA binding; F:tRNA binding; P:ribosome biogenesis	-	C:GO:0005840; F:GO:0003735; P:GO:0006412; F:GO:0019843; F:GO:0000049; P:GO:0042254	159.073	gi|501511279|ref|WP_012519216.1|MULTISPECIES: 30S ribosomal protein S13 [Alteromonas]	WP_012519216.1,B4RT50.1,AEA98924.1,AFS38856.1,AFT76066.1,AFT79840.1,AFT96898.1,AFV87059.1,AGP83308.1,AGP87139.1,AGP91276.1,AGP95088.1,AGP99074.1,AGQ03247.1,EXF51364.1,AIG00186.1,KHT54545.1,KHT58638.1,AJP45150.1,AMJ79977.1,AMJ84132.1,AMJ99794.1,AMN13179.1
TRINITY_DN38389_c0_g1_i1	30s ribosomal protein s13	265	1	6.83957e-19	0.64	0	-		-
TRINITY_DN18494_c0_g1_i1	30s ribosomal protein s13	333	1	7.61257e-50	0.93	0	-		-
TRINITY_DN58797_c0_g1_i1	30s ribosomal protein s14	221	1	6.42131e-31	1	5	C:ribosome; F:structural constituent of ribosome; P:translation; F:rRNA binding; P:ribosome biogenesis	-	C:GO:0005840; F:GO:0003735; P:GO:0006412; F:GO:0019843; P:GO:0042254	112.464	gi|504763808|ref|WP_014950910.1|MULTISPECIES: 30S ribosomal protein S14 [Alteromonas]	WP_014950910.1,AFS38864.1,AFT76075.1,AFT79849.1,KHT54553.1,KHT54969.1,KHT58646.1,AMJ99802.1,AMN13187.1
TRINITY_DN63290_c0_g1_i1	30s ribosomal protein s14	205	1	6.27832e-19	0.97	0	-		-
TRINITY_DN2708_c0_g1_i1	30s ribosomal protein s15	321	1	2.49372e-57	1	5	C:ribosome; F:structural constituent of ribosome; P:translation; F:rRNA binding; P:ribosome biogenesis	-	C:GO:0005840; F:GO:0003735; P:GO:0006412; F:GO:0019843; P:GO:0042254	180.259	gi|501510320|ref|WP_012518257.1|MULTISPECIES: 30S ribosomal protein S15 [Alteromonas]	WP_012518257.1,B4RXU2.1,AEA97926.1,AFS37159.1,AFT74341.1,AFT78200.1,AFT95218.1,AFV85369.1,AGP77855.1,AGP81678.1,AGP85436.1,AGP89559.1,AGP93432.1,AGP97381.1,AGQ01657.1,KHT44237.1,KHT48406.1,KHT59573.1,AMJ78456.1,AMJ82607.1,AMJ98266.1,AMN11663.1
TRINITY_DN62361_c0_g1_i1	30s ribosomal protein s15	327	1	1.65821e-54	1	0	-		-
TRINITY_DN7811_c0_g1_i1	30s ribosomal protein s15	285	1	4.65014e-28	0.96	0	-		-
TRINITY_DN57916_c0_g1_i1	30s ribosomal protein s15	342	1	6.43809e-53	1	0	-		-
TRINITY_DN40014_c0_g1_i1	30s ribosomal protein s16	247	1	6.38366e-32	1	4	C:ribosome; F:structural constituent of ribosome; P:translation; P:ribosome biogenesis	-	C:GO:0005840; F:GO:0003735; P:GO:0006412; P:GO:0042254	114.775	gi|504761730|ref|WP_014948832.1|MULTISPECIES: 30S ribosomal protein S16 [Alteromonas]	WP_014948832.1,AFS36725.1,AFT73892.1,AFT77780.1,AFT94701.1,KHT52598.1,KHT56734.1,KHT59056.1,AMJ97878.1,AMN11226.1
TRINITY_DN14919_c0_g2_i1	30s ribosomal protein s17	412	1	1.56415	0.53	0	-		-
TRINITY_DN58624_c0_g1_i1	30s ribosomal protein s17	263	1	0.062489	0.59	0	-		-
TRINITY_DN14919_c0_g1_i1	30s ribosomal protein s17	395	1	1.43014	0.53	0	-		-
TRINITY_DN62429_c0_g1_i1	30s ribosomal protein s19	256	1	0.533355	0.51	7	F:structural constituent of ribosome; F:RNA binding; P:translation; C:small ribosomal subunit; C:ribonucleoprotein complex; C:ribosome; F:rRNA binding		F:GO:0003735; F:GO:0003723; P:GO:0006412; C:GO:0015935; C:GO:0030529; C:GO:0005840; F:GO:0019843	36.965	gi|501498348|ref|WP_012506602.1|30S ribosomal protein S19 [Prosthecochloris aestuarii]	WP_012506602.1,B4S5M3.1,ACF47070.1
TRINITY_DN37998_c0_g1_i1	30s ribosomal protein s19	329	1	1.87405e-56	1	5	F:structural constituent of ribosome; C:small ribosomal subunit; P:translation; F:rRNA binding; P:ribosome biogenesis	-	F:GO:0003735; C:GO:0015935; P:GO:0006412; F:GO:0019843; P:GO:0042254	178.333	gi|501509024|ref|WP_012516961.1|MULTISPECIES: 30S ribosomal protein S19 [Alteromonas]	WP_012516961.1,AEA96605.1,AFS35853.1,AFT73003.1,AFT76940.1,AFT93818.1,AFV83936.1,AGF95407.1,AGP76726.1,AGP80386.1,AGP84212.1,AGP88325.1,AGP92193.1,AGP95952.1,AGQ00286.1,EXF50543.1,AIF97556.1,KHT55392.1,KHT56645.1,KHT60874.1,AJP42667.1,AMJ77162.1,AMJ81305.1,AMJ96976.1,AMN10399.1
TRINITY_DN10257_c0_g1_i1	30s ribosomal protein s19e	331	1	2.31942	0.48	0	-		-
TRINITY_DN8986_c0_g2_i1	30s ribosomal protein s2	363	1	5.06472	0.61	6	F:structural constituent of ribosome; P:translation; C:small ribosomal subunit; C:ribonucleoprotein complex; C:ribosome; C:intracellular		F:GO:0003735; P:GO:0006412; C:GO:0015935; C:GO:0030529; C:GO:0005840; C:GO:0005622	36.5798	gi|58426194|gb|AAW75231.1|30S ribosomal protein S2 [Xanthomonas oryzae pv. oryzae KACC 10331]	AAW75231.1
TRINITY_DN49159_c0_g1_i1	30s ribosomal protein s2	476	1	4.00242e-112	1	4	F:structural constituent of ribosome; C:small ribosomal subunit; P:translation; P:ribosome biogenesis	-	F:GO:0003735; C:GO:0015935; P:GO:0006412; P:GO:0042254	327.02	gi|504761450|ref|WP_014948552.1|30S ribosomal protein S2 [Alteromonas macleodii]	WP_014948552.1,AFS36437.1,AFT73609.1,AFT77499.1,AFT94419.1,KHT60940.1,AMJ97517.1,AMN10965.1
TRINITY_DN38444_c0_g1_i1	30s ribosomal protein s2	320	1	8.7441e-35	0.95	0	-		-
TRINITY_DN16103_c0_g1_i1	30s ribosomal protein s2	321	1	4.95797e-31	0.94	0	-		-
TRINITY_DN52229_c0_g1_i1	30s ribosomal protein s20	488	1	5.56097e-41	1	5	C:ribosome; F:structural constituent of ribosome; P:translation; F:rRNA binding; P:ribosome biogenesis	-	C:GO:0005840; F:GO:0003735; P:GO:0006412; F:GO:0019843; P:GO:0042254	141.354	gi|501511031|ref|WP_012518968.1|30S ribosomal protein S20 [Alteromonas mediterranea]	WP_012518968.1,AEA98670.1,AFV86214.1,AGP78623.1,AGP82519.1,AGP86346.1,AGP90485.1,AGP94305.1,AGP98226.1,AGQ02485.1,AMJ79220.1,AMJ83362.1
TRINITY_DN19967_c0_g2_i1	30s ribosomal protein s20	268	1	4.59015e-37	0.91	0	-		-
TRINITY_DN63108_c0_g1_i1	30s ribosomal protein s20	255	1	1.06531e-38	0.98	0	-		-
TRINITY_DN50187_c0_g1_i1	30s ribosomal protein s20	222	1	2.96209	0.63	0	-		-
TRINITY_DN19967_c0_g1_i1	30s ribosomal protein s20	310	1	1.27382e-39	0.94	0	-		-
TRINITY_DN50092_c0_g1_i1	30s ribosomal protein s21	229	1	0.0129034	0.65	5	F:structural constituent of ribosome; P:translation; C:ribonucleoprotein complex; C:ribosome; C:intracellular		F:GO:0003735; P:GO:0006412; C:GO:0030529; C:GO:0005840; C:GO:0005622	40.0466	gi|495397743|ref|WP_008122443.1|30S ribosomal protein S21 [Prevotella timonensis]	WP_008122443.1,EFA98253.1,KGI21422.1
TRINITY_DN7148_c0_g1_i1	30s ribosomal protein s21	580	1	5.06103e-22	0.98	0	-		-
TRINITY_DN24713_c0_g1_i2	30s ribosomal protein s27e	410	1	2.44493	0.49	7	F:metal ion binding; F:structural constituent of ribosome; P:translation; C:ribonucleoprotein complex; F:zinc ion binding; C:ribosome; C:intracellular		F:GO:0046872; F:GO:0003735; P:GO:0006412; C:GO:0030529; F:GO:0008270; C:GO:0005840; C:GO:0005622	35.8094	gi|851282482|ref|WP_048147173.1|30S ribosomal protein S27e [Pyrococcus abyssi]	WP_048147173.1,Q9UXZ3.1,CAB50619.1,CCE71186.1
TRINITY_DN37990_c0_g1_i1	30s ribosomal protein s3	418	1	5.36484e-95	1	6	F:mRNA binding; F:structural constituent of ribosome; C:small ribosomal subunit; P:translation; F:rRNA binding; P:ribosome biogenesis	-	F:GO:0003729; F:GO:0003735; C:GO:0015935; P:GO:0006412; F:GO:0019843; P:GO:0042254	282.337	gi|504760876|ref|WP_014947978.1|MULTISPECIES: 30S ribosomal protein S3 [Alteromonas]	WP_014947978.1,AFS35855.1,AFT73005.1,AFT76942.1,AFT93820.1,AFV83938.1,AGF95409.1,AGP76728.1,AGP80388.1,AGP84214.1,AGP88327.1,AGP92195.1,AGP95954.1,AGQ00288.1,AEA96607.2,EXF50541.1,KHT55390.1,KHT56643.1,KHT60872.1,AMJ77164.1,AMJ81307.1,AMN10401.1
TRINITY_DN42547_c0_g1_i1	30s ribosomal protein s3	217	1	3.60043e-25	0.94	0	-		-
TRINITY_DN50663_c0_g1_i1	30s ribosomal protein s3	265	1	7.71457	0.55	0	-		-
TRINITY_DN44467_c0_g1_i1	30s ribosomal protein s4	202	1	1.85075e-38	1	5	F:structural constituent of ribosome; C:small ribosomal subunit; P:translation; F:rRNA binding; P:ribosome biogenesis	-	F:GO:0003735; C:GO:0015935; P:GO:0006412; F:GO:0019843; P:GO:0042254	134.806	gi|503552138|ref|WP_013786214.1|MULTISPECIES: 30S ribosomal protein S4 [Alteromonas]	WP_013786214.1,AEF05303.1,ALM93022.1,AMJ75792.1,AMJ88217.1,AMJ92074.1,AMJ95906.1,ANB21062.1,ANB25060.1
TRINITY_DN11488_c0_g1_i1	30s ribosomal protein s4	222	1	1.17844e-10	0.94	5	F:structural constituent of ribosome; C:small ribosomal subunit; P:translation; F:rRNA binding; P:ribosome biogenesis	-	F:GO:0003735; C:GO:0015935; P:GO:0006412; F:GO:0019843; P:GO:0042254	63.5438	gi|88814575|gb|EAR24437.1|30S ribosomal protein S4 [marine actinobacterium PHSC20C1]	EAR24437.1
TRINITY_DN24349_c0_g1_i2	30s ribosomal protein s4	671	1	5.75838	0.46	0	-		-
TRINITY_DN55040_c0_g1_i1	30s ribosomal protein s5	241	1	2.89005e-44	1	5	F:structural constituent of ribosome; C:small ribosomal subunit; P:translation; F:rRNA binding; P:ribosome biogenesis	-	F:GO:0003735; C:GO:0015935; P:GO:0006412; F:GO:0019843; P:GO:0042254	148.673	gi|501511284|ref|WP_012519221.1|MULTISPECIES: 30S ribosomal protein S5 [Alteromonas]	WP_012519221.1,B4RT45.1,AEA98929.1,AFS38860.1,AFT76071.1,AFT79845.1,AFT96903.1,AFV87064.1,AGP79302.1,AGP83313.1,AGP87144.1,AGP91281.1,AGP95093.1,AGP99079.1,AGQ03252.1,AIG00190.1,KHT54550.1,KHT54966.1,KHT58643.1,AJP45154.1,AMJ79982.1,AMJ84137.1,AMJ99799.1,AMN13184.1
TRINITY_DN60181_c0_g1_i1	30s ribosomal protein s5	208	1	4.32929e-43	1	5	F:structural constituent of ribosome; C:small ribosomal subunit; P:translation; F:rRNA binding; P:ribosome biogenesis	-	F:GO:0003735; C:GO:0015935; P:GO:0006412; F:GO:0019843; P:GO:0042254	145.206	gi|490866595|ref|WP_004728614.1|MULTISPECIES: 30S ribosomal protein S5 [Vibrio]	WP_004728614.1,EEX39357.1,ADT85890.1,EPP23208.1,EPP27448.1,KQH86472.1,KQH91740.1,AMF96022.1
TRINITY_DN48582_c0_g1_i1	30s ribosomal protein s5	370	1	8.75224e-08	0.64	0	-		-
TRINITY_DN27576_c0_g1_i1	30s ribosomal protein s5	1941	1	9.05145	0.46	0	-		-
TRINITY_DN38428_c0_g1_i1	30s ribosomal protein s6	414	1	6.82223e-55	1	5	C:ribosome; F:structural constituent of ribosome; P:translation; F:rRNA binding; P:ribosome biogenesis	-	C:GO:0005840; F:GO:0003735; P:GO:0006412; F:GO:0019843; P:GO:0042254	177.178	gi|504764018|ref|WP_014951120.1|MULTISPECIES: 30S ribosomal protein S6 [Alteromonas]	WP_014951120.1,AFS39081.1,AFT76293.1,AFT80052.1,AFT97133.1,EXF51152.1,KHT48758.1,KHT50811.1,KHT58866.1,AMJ99998.1,AMN13395.1
TRINITY_DN12515_c0_g1_i1	30s ribosomal protein s6	432	1	2.08692	0.5	1	C:ribosome		C:GO:0005840	38.1206	gi|503212326|ref|WP_013446987.1|30S ribosomal protein S6 [Riemerella anatipestifer]	WP_013446987.1,ADQ82266.1,ADZ12237.1,AFD56270.1,OBP50421.1,OBP54361.1
TRINITY_DN4499_c0_g1_i1	30s ribosomal protein s6	241	1	1.88373e-23	0.9	0	-		-
TRINITY_DN4499_c0_g2_i1	30s ribosomal protein s6	253	1	1.19669e-25	0.89	0	-		-
TRINITY_DN32941_c0_g2_i2	30s ribosomal protein s6	252	1	1.43816	0.46	0	-		-
TRINITY_DN6812_c0_g1_i1	30s ribosomal protein s6	230	1	0.889942	0.52	0	-		-
TRINITY_DN57146_c0_g1_i1	30s ribosomal protein s7	507	1	3.84789e-91	1	6	F:structural constituent of ribosome; C:small ribosomal subunit; P:translation; F:rRNA binding; F:tRNA binding; P:ribosome biogenesis	-	F:GO:0003735; C:GO:0015935; P:GO:0006412; F:GO:0019843; F:GO:0000049; P:GO:0042254	270.781	gi|504763934|ref|WP_014951036.1|MULTISPECIES: 30S ribosomal protein S7 [Alteromonas]	WP_014951036.1,AFS38995.1,AFT76208.1,AFT79970.1,KHT48836.1,KHT55527.1,KHT58783.1,AMJ99916.1,AMN13310.1
TRINITY_DN54503_c0_g1_i1	30s ribosomal protein s8	212	1	8.1027	0.5	0	-		-
TRINITY_DN58510_c0_g1_i1	30s ribosomal protein s8	465	1	2.09768	0.5	0	-		-
TRINITY_DN48100_c0_g1_i1	30s ribosomal protein s9	668	1	6.09341e-83	1	0	-		-
TRINITY_DN44015_c0_g1_i1	30s ribosomal protein s9	218	1	4.10395	0.52	0	-		-
TRINITY_DN30446_c0_g1_i11	30s ribosomal protein small subunit ribosomal protein s2	1226	1	1.87188	0.5	0	-		-
TRINITY_DN30446_c0_g1_i1	30s ribosomal protein small subunit ribosomal protein s2	1002	1	1.40431	0.5	0	-		-
TRINITY_DN30446_c0_g1_i3	30s ribosomal protein small subunit ribosomal protein s2	1092	1	1.59138	0.5	0	-		-
TRINITY_DN39883_c0_g1_i1	312 protein	206	1	2.60395e-16	0.82	0	-		-
TRINITY_DN63842_c0_g1_i1	33 kda inner dynein arm light axonemal protein	499	1	4.79297e-58	0.74	0	-		-
TRINITY_DN51487_c0_g1_i1	37s ribosomal protein mitochondrial	322	1	0.315242	0.52	0	-		-
TRINITY_DN15619_c0_g1_i1	38K, partial [Grapevine fanleaf virus]	465	1	6.46464	0.53	0	-		-
TRINITY_DN20374_c2_g1_i1	39s ribosomal protein l1	3063	1	7.83384e-101	0.73	0	-		-
TRINITY_DN21728_c0_g1_i1	39s ribosomal protein l34	506	1	1.20931e-21	0.7	0	-		-
TRINITY_DN15876_c0_g1_i1	39s ribosomal protein l48	413	1	5.63928e-37	0.77	0	-		-
TRINITY_DN15876_c0_g3_i1	39s ribosomal protein l48	307	1	2.289e-20	0.79	0	-		-
TRINITY_DN15876_c0_g2_i1	39s ribosomal protein l48	236	1	9.39012e-21	0.79	0	-		-
TRINITY_DN12566_c0_g1_i1	39s ribosomal protein l48	3192	1	8.83411e-62	0.8	0	-		-
TRINITY_DN12566_c0_g1_i2	39s ribosomal protein l48	3248	1	9.57608e-62	0.8	0	-		-
TRINITY_DN39865_c0_g1_i1	39s ribosomal protein mitochondrial	321	1	0.00113223	0.67	4	F:structural constituent of ribosome; P:translation; C:ribosome; C:intracellular		F:GO:0003735; P:GO:0006412; C:GO:0005840; C:GO:0005622	45.8246	gi|91089255|ref|XP_969352.1|PREDICTED: 39S ribosomal protein L12, mitochondrial [Tribolium castaneum]	XP_969352.1,EFA07911.1
TRINITY_DN34877_c0_g1_i5	39s ribosomal protein mitochondrial	1243	1	4.73672e-66	0.79	0	-		-
TRINITY_DN21943_c0_g1_i1	39s ribosomal protein mitochondrial	810	1	2.47837e-48	0.72	0	-		-
TRINITY_DN16201_c0_g1_i2	39s ribosomal protein mitochondrial	2771	1	9.06065e-131	0.67	0	-		-
TRINITY_DN13386_c0_g1_i1	39s ribosomal protein mitochondrial	443	1	1.00702e-11	0.57	0	-		-
TRINITY_DN32387_c0_g1_i2	39s ribosomal protein mitochondrial	1378	1	1.36942e-35	0.83	0	-		-
TRINITY_DN32387_c0_g1_i9	39s ribosomal protein mitochondrial	1668	1	2.59379e-31	0.89	0	-		-
TRINITY_DN31236_c0_g1_i3	39s ribosomal protein mitochondrial	1564	1	9.69191e-56	0.61	0	-		-
TRINITY_DN50975_c0_g1_i1	39s ribosomal protein mitochondrial	656	1	1.5355e-69	0.77	0	-		-
TRINITY_DN6471_c0_g1_i1	39s ribosomal protein mitochondrial	1317	1	4.71071e-67	0.65	0	-		-
TRINITY_DN29166_c0_g1_i1	39s ribosomal protein mitochondrial	894	1	1.02353e-104	0.84	0	-		-
TRINITY_DN35209_c0_g1_i2	39s ribosomal protein mitochondrial	1289	1	2.32761e-53	0.69	0	-		-
TRINITY_DN59611_c0_g1_i1	39s ribosomal protein mitochondrial	227	1	2.55796e-10	0.82	0	-		-
TRINITY_DN21878_c0_g1_i1	39s ribosomal protein mitochondrial	1168	1	2.27233e-165	0.86	0	-		-
TRINITY_DN13723_c0_g1_i1	39s ribosomal protein mitochondrial	867	1	2.11395e-102	0.79	0	-		-
TRINITY_DN31236_c0_g1_i1	39s ribosomal protein mitochondrial	1634	1	4.95358e-50	0.6	0	-		-
TRINITY_DN21580_c0_g1_i1	39s ribosomal protein mitochondrial	1081	1	2.93511e-88	0.7	0	-		-
TRINITY_DN31162_c0_g1_i1	39s ribosomal protein mitochondrial	1339	1	3.63482e-86	0.74	0	-		-
TRINITY_DN23997_c0_g1_i1	39s ribosomal protein mitochondrial	876	1	4.09878e-84	0.74	0	-		-
TRINITY_DN13478_c0_g1_i1	39s ribosomal protein mitochondrial	1536	1	5.47068e-29	0.89	0	-		-
TRINITY_DN6471_c0_g2_i1	39s ribosomal protein mitochondrial	1317	1	4.71071e-67	0.65	0	-		-
TRINITY_DN22292_c0_g1_i2	39s ribosomal protein mitochondrial	861	1	4.9325e-62	0.77	0	-		-
TRINITY_DN32387_c0_g1_i5	39s ribosomal protein mitochondrial	1588	1	1.5336e-20	0.77	0	-		-
TRINITY_DN13250_c0_g2_i1	39s ribosomal protein mitochondrial	640	1	2.88419e-55	0.84	0	-		-
TRINITY_DN14387_c0_g1_i1	39s ribosomal protein mitochondrial	1000	1	2.75172e-75	0.74	0	-		-
TRINITY_DN22292_c0_g1_i1	39s ribosomal protein mitochondrial	839	1	7.2614e-62	0.77	0	-		-
TRINITY_DN27464_c0_g1_i1	39s ribosomal protein mitochondrial	746	1	1.35627e-10	0.6	0	-		-
TRINITY_DN23872_c0_g1_i1	39s ribosomal protein mitochondrial	784	1	3.60495e-31	0.63	0	-		-
TRINITY_DN7700_c0_g1_i1	39s ribosomal protein mitochondrial	1662	1	8.13542e-73	0.79	0	-		-
TRINITY_DN31236_c0_g1_i2	39s ribosomal protein mitochondrial	1777	1	5.71113e-58	0.62	0	-		-
TRINITY_DN26046_c0_g1_i1	39s ribosomal protein mitochondrial	1496	1	8.30366e-136	0.8	0	-		-
TRINITY_DN32387_c0_g1_i3	39s ribosomal protein mitochondrial	1436	1	1.33935e-20	0.77	0	-		-
TRINITY_DN32387_c0_g1_i8	39s ribosomal protein mitochondrial	898	1	6.37292e-21	0.77	0	-		-
TRINITY_DN32387_c0_g1_i4	39s ribosomal protein mitochondrial	1610	1	7.76638e-36	0.83	0	-		-
TRINITY_DN23654_c1_g1_i1	39s ribosomal protein mitochondrial	1030	1	6.29704e-45	0.87	0	-		-
TRINITY_DN30579_c0_g2_i1	39s ribosomal protein mitochondrial	562	1	9.30843e-13	0.72	0	-		-
TRINITY_DN43106_c0_g1_i1	39s ribosomal protein mitochondrial	259	1	0.00962003	0.61	0	-		-
TRINITY_DN13723_c0_g1_i2	39s ribosomal protein mitochondrial	797	1	2.55306e-62	0.89	0	-		-
TRINITY_DN32387_c0_g1_i6	39s ribosomal protein mitochondrial	1530	1	1.2238e-35	0.83	0	-		-
TRINITY_DN22800_c0_g1_i1	39s ribosomal protein mitochondrial	1103	1	4.06292e-98	0.88	0	-		-
TRINITY_DN16201_c0_g1_i1	39s ribosomal protein mitochondrial	2770	1	6.57694e-131	0.67	0	-		-
TRINITY_DN27845_c0_g1_i1	39s ribosomal protein mitochondrial	1205	1	1.19723e-129	0.88	0	-		-
TRINITY_DN23997_c0_g1_i2	39s ribosomal protein mitochondrial	994	1	1.64703e-83	0.74	0	-		-
TRINITY_DN50962_c0_g1_i1	39s ribosomal protein mitochondrial	1149	1	2.29713e-116	0.77	0	-		-
TRINITY_DN16671_c0_g1_i1	39s ribosomal protein mitochondrial	871	1	7.79354e-23	0.79	0	-		-
TRINITY_DN15604_c0_g1_i1	39s ribosomal protein mitochondrial	278	1	1.27034e-05	0.86	0	-		-
TRINITY_DN23669_c0_g1_i1	39s ribosomal protein mitochondrial	809	1	7.94816e-26	0.75	0	-		-
TRINITY_DN29499_c0_g2_i1	39s ribosomal protein mitochondrial precursor	535	1	5.99168	0.43	0	-		-
TRINITY_DN29499_c0_g3_i1	39s ribosomal protein mitochondrial precursor	535	1	5.99168	0.43	0	-		-
TRINITY_DN24913_c0_g1_i2	39s ribosomal protein partial	612	1	2.01125e-25	0.88	0	-		-
TRINITY_DN24913_c0_g1_i1	39s ribosomal protein partial	692	1	4.29332e-25	0.88	0	-		-
TRINITY_DN24913_c0_g1_i4	39s ribosomal protein partial	691	1	6.09997e-09	0.6	0	-		-
TRINITY_DN15604_c0_g3_i1	39s ribosomal protein partial	266	1	8.04659e-07	0.82	0	-		-
TRINITY_DN24913_c0_g1_i3	39s ribosomal protein partial	611	1	3.83755e-09	0.6	0	-		-
TRINITY_DN38417_c0_g1_i1	3-beta hydroxysteroid dehydrogenase	222	1	3.61045	0.54	0	-		-
TRINITY_DN43639_c0_g1_i1	3-beta-hydroxy-delta -steroid dehydrogenase	254	1	0.610433	0.59	0	-		-
TRINITY_DN51177_c0_g1_i1	3-chlorobenzoate- -dioxygenase oxygenase subunit	734	1	1.81897e-16	0.8	0	-		-
TRINITY_DN38300_c0_g1_i1	3d domain protein	222	1	2.7274	0.56	3	F:hydrolase activity, hydrolyzing O-glycosyl compounds; P:peptidoglycan turnover; C:outer membrane		F:GO:0004553; P:GO:0009254; C:GO:0019867	35.4242	gi|497029123|ref|WP_009440785.1|3D domain protein [Selenomonas sp. oral taxon 138]	WP_009440785.1,EKX97579.1
TRINITY_DN7116_c0_g1_i1	3-dehydroquinate dehydratase	305	1	3.19703	0.48	0	-		-
TRINITY_DN2965_c0_g1_i1	3-dehydroquinate synthase	474	1	2.84015	0.54	6	C:cytoplasm; P:chorismate biosynthetic process; P:cellular amino acid biosynthetic process; F:lyase activity; P:aromatic amino acid family biosynthetic process; F:3-dehydroquinate synthase activity		C:GO:0005737; P:GO:0009423; P:GO:0008652; F:GO:0016829; P:GO:0009073; F:GO:0003856	38.1206	gi|502491168|ref|WP_012805104.1|3-dehydroquinate synthase [Brachybacterium faecium]	WP_012805104.1,YP_003154923.1,ACU85333.1
TRINITY_DN32774_c0_g6_i1	3-dehydroquinate synthase	203	1	9.33699	0.56	6	C:cytoplasm; P:chorismate biosynthetic process; P:cellular amino acid biosynthetic process; F:lyase activity; P:aromatic amino acid family biosynthetic process; F:3-dehydroquinate synthase activity		C:GO:0005737; P:GO:0009423; P:GO:0008652; F:GO:0016829; P:GO:0009073; F:GO:0003856	33.8834	gi|504256228|ref|WP_014443330.1|3-dehydroquinate synthase [Actinoplanes missouriensis]	WP_014443330.1,BAL88435.1
TRINITY_DN40_c0_g1_i1	3-dehydroquinate synthase	450	1	4.46281	0.45	0	-		-
TRINITY_DN41004_c0_g1_i1	3-dehydroquinate synthase	249	1	0.313729	0.51	0	-		-
TRINITY_DN9605_c0_g1_i1	3-dehydroquinate synthase	515	1	3.09846	0.64	0	-		-
TRINITY_DN3308_c0_g1_i1	3-deoxy-d-manno-octulosonate 8-phosphate phosphatase	397	1	2.38189	0.53	4	P:dephosphorylation; P:lipopolysaccharide biosynthetic process; F:3-deoxy-manno-octulosonate-8-phosphatase activity; F:hydrolase activity		P:GO:0016311; P:GO:0009103; F:GO:0019143; F:GO:0016787	37.3502	gi|490544700|ref|WP_004409824.1|3-deoxy-D-manno-octulosonate 8-phosphate phosphatase [Vibrio orientalis]	WP_004409824.1,EEX95241.1,EGU52280.1
TRINITY_DN5691_c0_g1_i2	3-deoxy-d-manno-octulosonate 8-phosphate phosphatase	348	1	6.76082	0.56	0	-		-
TRINITY_DN51837_c0_g1_i1	3-deoxy-d-manno-octulosonate 8-phosphate phosphatase	338	1	2.01296	0.47	0	-		-
TRINITY_DN61220_c0_g1_i1	3-deoxy-d-manno-octulosonic acid transferase	309	1	4.85042	0.56	0	-		-
TRINITY_DN52401_c0_g1_i1	3-deoxy-manno-octulosonate cytidylyltransferase	395	1	1.5739	0.4	0	-		-
TRINITY_DN925_c0_g1_i1	3-deoxy-manno-octulosonate cytidylyltransferase	611	1	2.35183	0.51	0	-		-
TRINITY_DN15565_c0_g1_i1	3-deoxy-manno-octulosonate cytidylyltransferase	362	1	3.10079	0.61	0	-		-
TRINITY_DN53674_c0_g1_i1	3-hydroxy acid dehydrogenase	294	1	2.38591	0.55	0	-		-
TRINITY_DN40387_c0_g1_i1	3-hydroxy-3-methylglutaryl-coenzyme a reductase	306	1	4.65578	0.55	5	P:oxidation-reduction process; F:hydroxymethylglutaryl-CoA reductase (NADPH) activity; P:coenzyme A metabolic process; F:oxidoreductase activity, acting on the CH-OH group of donors, NAD or NADP as acceptor; F:coenzyme binding		P:GO:0055114; F:GO:0004420; P:GO:0015936; F:GO:0016616; F:GO:0050662	36.1946	gi|255940168|ref|XP_002560853.1|Pc16g05060 [Penicillium rubens Wisconsin 54-1255]	XP_002560853.1,CAP93176.1,KZN83778.1
TRINITY_DN18059_c0_g1_i1	3-hydroxy-3-methylglutaryl-coenzyme a reductase	259	1	1.12061e-37	0.85	0	-		-
TRINITY_DN33890_c0_g2_i1	3-hydroxy-3-methylglutaryl-coenzyme a reductase	596	1	3.55188e-15	0.52	0	-		-
TRINITY_DN27559_c0_g1_i2	3-hydroxy-3-methylglutaryl-coenzyme a reductase	591	1	2.74585e-40	0.66	0	-		-
TRINITY_DN17620_c0_g1_i1	3-hydroxy-3-methylglutaryl-coenzyme a reductase	459	1	2.85286e-45	0.71	0	-		-
TRINITY_DN27559_c0_g1_i1	3-hydroxy-3-methylglutaryl-coenzyme a reductase	548	1	2.148e-30	0.58	0	-		-
TRINITY_DN25098_c0_g1_i1	3-hydroxy-3-methylglutaryl-coenzyme a reductase	941	1	3.54816e-66	0.59	0	-		-
TRINITY_DN25098_c0_g2_i1	3-hydroxy-3-methylglutaryl-coenzyme a reductase	1210	1	5.23493e-67	0.66	0	-		-
TRINITY_DN33890_c0_g1_i1	3-hydroxy-3-methylglutaryl-coenzyme a reductase	596	1	2.82253e-15	0.52	0	-		-
TRINITY_DN33890_c0_g3_i1	3-hydroxy-3-methylglutaryl-coenzyme a reductase	3466	1	0	0.77	0	-		-
TRINITY_DN24388_c0_g1_i1	3-hydroxy-3-methylglutaryl-coenzyme a reductase-like	415	1	4.90824e-57	0.88	0	-		-
TRINITY_DN14705_c0_g1_i1	3-hydroxyacyl- dehydrogenase	421	1	0.156533	0.43	9	P:fatty acid metabolic process; P:lipid metabolic process; F:coenzyme binding; F:3-hydroxyacyl-CoA dehydrogenase activity; P:oxidation-reduction process; F:oxidoreductase activity, acting on the CH-OH group of donors, NAD or NADP as acceptor; F:oxidoreductase activity; F:catalytic activity; P:metabolic process		P:GO:0006631; P:GO:0006629; F:GO:0050662; F:GO:0003857; P:GO:0055114; F:GO:0016616; F:GO:0016491; F:GO:0003824; P:GO:0008152	41.5874	gi|504612111|ref|WP_014799213.1|3-hydroxyacyl-CoA dehydrogenase [Flexibacter litoralis]	WP_014799213.1,AFM05787.1
TRINITY_DN52280_c0_g1_i1	3-hydroxyacyl- dehydrogenase	364	1	1.14396	0.55	8	P:oxidation-reduction process; F:oxidoreductase activity; P:phenylacetate catabolic process; F:3-hydroxybutyryl-CoA dehydrogenase activity; F:oxidoreductase activity, acting on the CH-OH group of donors, NAD or NADP as acceptor; F:coenzyme binding; F:3-hydroxyacyl-CoA dehydrogenase activity; P:fatty acid metabolic process		P:GO:0055114; F:GO:0016491; P:GO:0010124; F:GO:0008691; F:GO:0016616; F:GO:0050662; F:GO:0003857; P:GO:0006631	38.5058	gi|496887313|ref|WP_009398377.1|3-hydroxyacyl-CoA dehydrogenase PaaC [Pseudomonas putida]	WP_009398377.1,EKX85123.1
TRINITY_DN61902_c0_g1_i1	3-hydroxyacyl- dehydrogenase	208	1	7.99238	0.63	0	-		-
TRINITY_DN29773_c0_g3_i1	3-hydroxyacyl- dehydrogenase	1220	1	5.49936	0.46	0	-		-
TRINITY_DN13027_c0_g1_i1	3-hydroxyacyl- dehydrogenase	412	1	9.00433	0.45	0	-		-
TRINITY_DN26054_c0_g3_i1	3-hydroxyacyl- dehydrogenase	243	1	0.162632	0.56	0	-		-
TRINITY_DN26054_c0_g1_i1	3-hydroxyacyl- dehydrogenase	466	1	1.44544	0.56	0	-		-
TRINITY_DN61550_c0_g1_i1	3-hydroxyacyl- dehydrogenase	252	1	1.69266	0.53	0	-		-
TRINITY_DN26054_c0_g4_i1	3-hydroxyacyl- dehydrogenase	243	1	0.205782	0.56	0	-		-
TRINITY_DN61749_c0_g1_i1	3-hydroxyacyl- dehydrogenase	352	1	4.55639	0.59	0	-		-
TRINITY_DN26054_c0_g1_i2	3-hydroxyacyl- dehydrogenase	486	1	2.43882	0.57	0	-		-
TRINITY_DN61216_c0_g1_i1	3-hydroxyacyl- dehydrogenase type-2	384	1	1.2735e-16	0.58	3	P:ER to Golgi vesicle-mediated transport; P:transport; C:intracellular		P:GO:0006888; P:GO:0006810; C:GO:0005622	79.7221	gi|675172819|ref|XP_008895294.1|hypothetical protein PPTG_04758 [Phytophthora parasitica INRA-310]	XP_008895294.1,ETI38586.1,ETK78789.1,ETL32219.1,ETL85476.1,ETM38620.1,ETN19443.1,ETO67357.1,ETP08493.1,ETP36533.1,KUF97968.1
TRINITY_DN19801_c1_g1_i1	3-hydroxyacyl- dehydrogenase type-2	733	1	2.9134e-39	0.8	0	-		-
TRINITY_DN25092_c1_g1_i1	3-hydroxyacyl- dehydrogenase type-2	2209	1	4.12495e-158	0.95	0	-		-
TRINITY_DN25092_c1_g1_i2	3-hydroxyacyl- dehydrogenase type-2	2355	1	5.77485e-159	0.95	0	-		-
TRINITY_DN3858_c0_g2_i1	3-hydroxyacyl- dehydrogenase type-2	242	1	0.0157679	0.67	0	-		-
TRINITY_DN30971_c0_g1_i3	3-hydroxyacyl-acp dehydratase	1307	1	0.0775904	0.42	0	-		-
TRINITY_DN65330_c0_g1_i1	3-hydroxyanthranilate -dioxygenase	205	1	3.87288e-28	0.88	0	-		-
TRINITY_DN7789_c0_g1_i1	3-hydroxybenzoate 6-hydroxylase 1	262	1	8.00574	0.52	0	-		-
TRINITY_DN2484_c0_g1_i1	3-hydroxybutyryl- epimerase	243	1	4.44044	0.5	0	-		-
TRINITY_DN50440_c0_g1_i1	3-hydroxyisobutyrate dehydrogenase	352	1	0.278703	0.55	0	-		-
TRINITY_DN8667_c0_g1_i1	3-hydroxyisobutyryl- mitochondrial	270	1	0.188675	0.67	0	-		-
TRINITY_DN40982_c1_g1_i1	3-hydroxyisobutyryl- mitochondrial	1598	1	0	0.8	0	-		-
TRINITY_DN49721_c0_g1_i1	3-hydroxyisobutyryl- mitochondrial	227	1	4.29049e-14	0.8	0	-		-
TRINITY_DN18586_c0_g1_i1	3-hydroxymethyl-3-methylglutaryl- cytoplasmic	221	1	0.94858	0.57	0	-		-
TRINITY_DN6754_c0_g1_i1	3-hydroxymethyl-3-methylglutaryl- cytoplasmic	254	1	0.00014502	0.64	0	-		-
TRINITY_DN6754_c0_g2_i1	3-hydroxymethyl-3-methylglutaryl- cytoplasmic	240	1	0.00544623	0.61	0	-		-
TRINITY_DN18382_c0_g1_i1	3-isopropylmalate dehydratase	393	1	1.81917	0.38	0	-		-
TRINITY_DN37513_c0_g1_i1	3-isopropylmalate dehydratase	248	1	0.0367082	0.55	0	-		-
TRINITY_DN26689_c0_g1_i1	3-isopropylmalate dehydratase	1096	1	6.38269	0.47	0	-		-
TRINITY_DN12510_c0_g1_i1	3-isopropylmalate dehydratase small subunit	280	1	4.03632	0.58	0	-		-
TRINITY_DN45667_c0_g1_i1	3-isopropylmalate dehydrogenase	240	1	2.42678	0.57	10	F:NAD binding; F:3-isopropylmalate dehydrogenase activity; P:branched-chain amino acid biosynthetic process; C:cytoplasm; P:oxidation-reduction process; F:oxidoreductase activity, acting on the CH-OH group of donors, NAD or NADP as acceptor; F:oxidoreductase activity; P:leucine biosynthetic process; F:metal ion binding; F:magnesium ion binding		F:GO:0051287; F:GO:0003862; P:GO:0009082; C:GO:0005737; P:GO:0055114; F:GO:0016616; F:GO:0016491; P:GO:0009098; F:GO:0046872; F:GO:0000287	35.8094	gi|258578307|ref|XP_002543335.1|3-isopropylmalate dehydrogenase [Uncinocarpus reesii 1704]	XP_002543335.1,EEP78002.1
TRINITY_DN32614_c1_g1_i1	3-isopropylmalate dehydrogenase	529	1	7.99489	0.43	0	-		-
TRINITY_DN2018_c0_g1_i1	3-isopropylmalate dehydrogenase	222	1	7.35827e-11	0.75	0	-		-
TRINITY_DN13028_c0_g1_i1	3-isopropylmalate large subunit	397	1	0.318282	0.48	9	P:branched-chain amino acid biosynthetic process; F:3-isopropylmalate dehydratase activity; F:4 iron, 4 sulfur cluster binding; F:lyase activity; F:iron-sulfur cluster binding; P:leucine biosynthetic process; P:metabolic process; F:metal ion binding; P:cellular amino acid biosynthetic process		P:GO:0009082; F:GO:0003861; F:GO:0051539; F:GO:0016829; F:GO:0051536; P:GO:0009098; P:GO:0008152; F:GO:0046872; P:GO:0008652	40.4318	gi|291067757|gb|EFE05866.1|3-isopropylmalate dehydratase, large subunit [Citrobacter youngae ATCC 29220]	EFE05866.1
TRINITY_DN59768_c0_g1_i1	3-isopropylmalate large subunit	277	1	1.69041	0.57	9	P:branched-chain amino acid biosynthetic process; F:3-isopropylmalate dehydratase activity; F:4 iron, 4 sulfur cluster binding; F:lyase activity; F:iron-sulfur cluster binding; P:leucine biosynthetic process; P:metabolic process; F:metal ion binding; P:cellular amino acid biosynthetic process		P:GO:0009082; F:GO:0003861; F:GO:0051539; F:GO:0016829; F:GO:0051536; P:GO:0009098; P:GO:0008152; F:GO:0046872; P:GO:0008652	36.965	gi|357938680|gb|AET92237.1|3-isopropylmalate dehydratase, large subunit [Burkholderia sp. YI23]	AET92237.1
TRINITY_DN62032_c0_g1_i1	3-ketoacyl- mitochondrial	241	1	2.53723e-29	0.88	0	-		-
TRINITY_DN30352_c0_g1_i1	3-ketoacyl-acp reductase	585	1	7.2068	0.5	0	-		-
TRINITY_DN30352_c0_g1_i2	3-ketoacyl-acp reductase	505	1	6.91658	0.56	0	-		-
TRINITY_DN15808_c0_g1_i1	3-ketodihydrosphingosine reductase	530	1	1.08919e-19	0.84	2	F:oxidoreductase activity; P:oxidation-reduction process	-	F:GO:0016491; P:GO:0055114	93.9745	gi|551489005|ref|XP_005796076.1|PREDICTED: 3-ketodihydrosphingosine reductase [Xiphophorus maculatus]	XP_005796076.1
TRINITY_DN35777_c0_g1_i25	3-ketodihydrosphingosine reductase	439	1	4.18586e-20	0.84	2	F:oxidoreductase activity; P:oxidation-reduction process	-	F:GO:0016491; P:GO:0055114	93.9745	gi|551489005|ref|XP_005796076.1|PREDICTED: 3-ketodihydrosphingosine reductase [Xiphophorus maculatus]	XP_005796076.1
TRINITY_DN27381_c0_g1_i1	3-ketodihydrosphingosine reductase	1905	1	3.03666e-155	0.78	0	-		-
TRINITY_DN35777_c0_g1_i21	3-ketodihydrosphingosine reductase	3146	1	1.56306e-118	0.74	0	-		-
TRINITY_DN35777_c0_g1_i7	3-ketodihydrosphingosine reductase	3266	1	5.62674e-95	0.73	0	-		-
TRINITY_DN35777_c0_g1_i14	3-ketodihydrosphingosine reductase	3412	1	2.77375e-87	0.78	0	-		-
TRINITY_DN35777_c0_g1_i6	3-ketodihydrosphingosine reductase	2834	1	1.99743e-76	0.8	0	-		-
TRINITY_DN35777_c0_g1_i2	3-ketodihydrosphingosine reductase	3235	1	2.01016e-113	0.79	0	-		-
TRINITY_DN35777_c0_g1_i18	3-ketodihydrosphingosine reductase	3205	1	5.50545e-95	0.73	0	-		-
TRINITY_DN35777_c0_g1_i16	3-ketodihydrosphingosine reductase	3355	1	7.17079e-91	0.78	0	-		-
TRINITY_DN39497_c0_g1_i1	3-ketodihydrosphingosine reductase	214	1	1.38697e-07	0.88	0	-		-
TRINITY_DN35777_c0_g1_i19	3-ketodihydrosphingosine reductase	2893	1	6.09793e-61	0.79	0	-		-
TRINITY_DN35777_c0_g1_i12	3-ketodihydrosphingosine reductase	3262	1	2.1349e-91	0.73	0	-		-
TRINITY_DN35777_c0_g1_i4	3-ketodihydrosphingosine reductase	3296	1	2.9526e-113	0.79	0	-		-
TRINITY_DN35777_c0_g1_i8	3-ketodihydrosphingosine reductase	3294	1	7.02094e-91	0.78	0	-		-
TRINITY_DN35777_c0_g1_i15	3-ketodihydrosphingosine reductase	3011	1	1.77111e-57	0.79	0	-		-
TRINITY_DN35777_c0_g1_i3	3-ketodihydrosphingosine reductase	2954	1	6.24925e-61	0.79	0	-		-
TRINITY_DN42002_c0_g1_i1	3-ketodihydrosphingosine reductase	389	1	8.94172e-34	0.75	0	-		-
TRINITY_DN35777_c0_g1_i9	3-ketodihydrosphingosine reductase	2950	1	2.33057e-57	0.79	0	-		-
TRINITY_DN35777_c0_g1_i20	3-ketodihydrosphingosine reductase	2895	1	2.63095e-76	0.8	0	-		-
TRINITY_DN35777_c0_g1_i1	3-ketodihydrosphingosine reductase	3323	1	2.18096e-91	0.73	0	-		-
TRINITY_DN35777_c0_g1_i24	3-ketodihydrosphingosine reductase	3207	1	2.3719e-118	0.74	0	-		-
TRINITY_DN35777_c0_g1_i10	3-ketodihydrosphingosine reductase	3351	1	2.71693e-87	0.78	0	-		-
TRINITY_DN53241_c0_g1_i1	3-ketodihydrosphingosine reductase	228	1	6.88502e-13	0.73	0	-		-
TRINITY_DN46797_c0_g1_i1	3-ketosteroid-9-alpha-hydroxylase reductase subunit	420	1	4.97869	0.52	0	-		-
TRINITY_DN5047_c0_g1_i1	3-ketosteroid-9-alpha-hydroxylase reductase subunit	475	1	3.45162	0.58	0	-		-
TRINITY_DN16585_c0_g1_i1	3-like protein	558	1	3.84286e-35	0.72	0	-		-
TRINITY_DN16585_c0_g1_i2	3-like protein	556	1	2.36855e-35	0.68	0	-		-
TRINITY_DN60209_c0_g1_i1	3-methyl-2-oxobutanoate dehydrogenase (2-methylpropanoyl-transferring) subunit alpha	211	1	3.25249	0.47	0	-		-
TRINITY_DN49546_c0_g1_i1	3-methyl-2-oxobutanoate dehydrogenase subunit	355	1	6.9955	0.5	4	P:oxidation-reduction process; F:oxidoreductase activity; P:metabolic process; F:catalytic activity		P:GO:0055114; F:GO:0016491; P:GO:0008152; F:GO:0003824	36.1946	gi|504061690|ref|WP_014295684.1|3-methyl-2-oxobutanoate dehydrogenase subunit VorB [Marinitoga piezophila]	WP_014295684.1,AEX84612.1
TRINITY_DN22086_c0_g2_i1	3-methyladenine dna glycosylase	349	1	6.61249	0.58	0	-		-
TRINITY_DN36335_c0_g1_i1	3-methylcrotonyl- carboxylase	208	1	1.60714	0.62	0	-		-
TRINITY_DN16096_c0_g2_i1	3-octaprenyl-4-hydroxybenzoate carboxy-lyase	415	1	0.508874	0.58	0	-		-
TRINITY_DN64121_c0_g1_i1	3-oxoacyl-(acyl carrier protein) synthase partial	281	1	0.00536575	0.75	5	F:transferase activity; P:metabolic process; F:catalytic activity; F:beta-ketoacyl-acyl-carrier-protein synthase II activity; F:transferase activity, transferring acyl groups		F:GO:0016740; P:GO:0008152; F:GO:0003824; F:GO:0033817; F:GO:0016746	43.8986	gi|487652203|ref|WP_001747474.1|beta-ketoacyl-[acyl-carrier-protein] synthase II, partial [Salmonella enterica]	WP_001747474.1,ELP22171.1
TRINITY_DN13994_c0_g1_i1	3-oxoacyl-(acyl-carrier-protein) reductase	936	1	2.03063	0.52	0	-		-
TRINITY_DN44655_c0_g1_i1	3-oxoacyl-(acyl-carrier-protein) reductase 1	329	1	3.55389	0.59	0	-		-
TRINITY_DN9233_c0_g2_i1	3-oxoacyl-(acyl-carrier-protein) synthase	588	1	5.71617	0.51	0	-		-
TRINITY_DN9233_c0_g1_i1	3-oxoacyl-(acyl-carrier-protein) synthase	660	1	7.56516	0.51	0	-		-
TRINITY_DN34209_c0_g1_i1	3-oxoacyl-[acyl-carrier protein] reductase [Renibacterium salmoninarum ATCC 33209]	975	1	5.16429	0.49	3	P:oxidation-reduction process; F:oxidoreductase activity; F:3-oxoacyl-[acyl-carrier-protein] reductase (NADPH) activity		P:GO:0055114; F:GO:0016491; F:GO:0004316	38.5058	gi|162952942|gb|ABY22457.1|3-oxoacyl-[acyl-carrier protein] reductase [Renibacterium salmoninarum ATCC 33209]	ABY22457.1
TRINITY_DN34209_c0_g1_i4	3-oxoacyl-[acyl-carrier protein] reductase [Renibacterium salmoninarum ATCC 33209]	1095	1	6.02463	0.49	3	P:oxidation-reduction process; F:oxidoreductase activity; F:3-oxoacyl-[acyl-carrier-protein] reductase (NADPH) activity		P:GO:0055114; F:GO:0016491; F:GO:0004316	38.5058	gi|162952942|gb|ABY22457.1|3-oxoacyl-[acyl-carrier protein] reductase [Renibacterium salmoninarum ATCC 33209]	ABY22457.1
TRINITY_DN34209_c0_g1_i10	3-oxoacyl-[acyl-carrier protein] reductase [Renibacterium salmoninarum ATCC 33209]	1020	1	5.48699	0.49	3	P:oxidation-reduction process; F:oxidoreductase activity; F:3-oxoacyl-[acyl-carrier-protein] reductase (NADPH) activity		P:GO:0055114; F:GO:0016491; F:GO:0004316	38.5058	gi|162952942|gb|ABY22457.1|3-oxoacyl-[acyl-carrier protein] reductase [Renibacterium salmoninarum ATCC 33209]	ABY22457.1
TRINITY_DN43000_c0_g1_i1	3-oxoacyl-[acyl-carrier-protein] reductase [Schizosaccharomyces cryophilus OY26]	243	1	2.26796	0.6	0	-		-
TRINITY_DN30298_c0_g1_i1	3-oxoacyl-[acyl-carrier-protein] synthase [Daphnia magna]	1748	1	0	0.79	0	-		-
TRINITY_DN30298_c0_g1_i2	3-oxoacyl-[acyl-carrier-protein] synthase [Daphnia magna]	1951	1	0	0.79	0	-		-
TRINITY_DN3693_c0_g1_i1	3-oxoacyl-[acyl-carrier-protein] synthase [Daphnia magna]	598	1	5.04301e-38	0.72	0	-		-
TRINITY_DN33520_c0_g1_i7	3-oxoacyl-[acyl-carrier-protein] synthase 2 [Acetobacter sp. CAG:267]	1172	1	1.71098	0.51	0	-		-
TRINITY_DN33520_c0_g1_i1	3-oxoacyl-[acyl-carrier-protein] synthase 2 [Acetobacter sp. CAG:267]	1147	1	2.05305	0.51	0	-		-
TRINITY_DN33520_c0_g1_i4	3-oxoacyl-[acyl-carrier-protein] synthase 2 [Acetobacter sp. CAG:267]	999	1	1.63082	0.51	0	-		-
TRINITY_DN33520_c0_g1_i3	3-oxoacyl-[acyl-carrier-protein] synthase 2 [Acetobacter sp. CAG:267]	1376	1	2.71659	0.51	0	-		-
TRINITY_DN33520_c0_g1_i6	3-oxoacyl-[acyl-carrier-protein] synthase 2 [Acetobacter sp. CAG:267]	1320	1	2.05185	0.51	0	-		-
TRINITY_DN33520_c0_g1_i9	3-oxoacyl-[acyl-carrier-protein] synthase 2 [Acetobacter sp. CAG:267]	1050	1	1.7773	0.51	0	-		-
TRINITY_DN33520_c0_g1_i5	3-oxoacyl-[acyl-carrier-protein] synthase 2 [Acetobacter sp. CAG:267]	1595	1	3.34566	0.51	0	-		-
TRINITY_DN33520_c0_g1_i2	3-oxoacyl-[acyl-carrier-protein] synthase 2 [Acetobacter sp. CAG:267]	1524	1	3.13884	0.51	0	-		-
TRINITY_DN33520_c0_g1_i10	3-oxoacyl-[acyl-carrier-protein] synthase 2 [Acetobacter sp. CAG:267]	1447	1	2.91479	0.51	0	-		-
TRINITY_DN33520_c0_g1_i11	3-oxoacyl-[acyl-carrier-protein] synthase 2 [Acetobacter sp. CAG:267]	1198	1	2.19954	0.51	0	-		-
TRINITY_DN48868_c0_g1_i1	3-oxoacyl-[acyl-carrier-protein] synthase 2 [candidate division TM6 bacterium GW2011_GWF2_38_10]	303	1	3.51202	0.51	0	-		-
TRINITY_DN42693_c0_g1_i1	3-oxoacyl-[acyl-carrier-protein] synthase II, partial [Streptomyces sp. MnatMP-M27]	386	1	9.74992	0.51	0	-		-
TRINITY_DN15923_c0_g1_i1	3-oxoacyl-acp reductase	500	1	4.37266	0.63	0	-		-
TRINITY_DN50501_c0_g1_i1	3-oxoacyl-acp reductase	227	1	6.54021e-22	0.77	0	-		-
TRINITY_DN58485_c0_g1_i1	3-oxoacyl-acp reductase	228	1	3.21698	0.52	0	-		-
TRINITY_DN40030_c0_g1_i1	3-oxoacyl-acp reductase	229	1	0.247124	0.53	0	-		-
TRINITY_DN23462_c0_g1_i1	3-oxoacyl-acp synthase	717	1	7.832	0.49	12	F:transferase activity; P:fatty acid biosynthetic process; P:fatty acid metabolic process; P:lipid metabolic process; C:cytoplasm; P:lipid biosynthetic process; F:beta-ketoacyl-acyl-carrier-protein synthase III activity; F:3-oxoacyl-[acyl-carrier-protein] synthase activity; F:catalytic activity; F:transferase activity, transferring acyl groups other than amino-acyl groups; F:transferase activity,…		F:GO:0016740; P:GO:0006633; P:GO:0006631; P:GO:0006629; C:GO:0005737; P:GO:0008610; F:GO:0033818; F:GO:0004315; F:GO:0003824; F:GO:0016747; F:GO:0016746; P:GO:0008152	38.1206	gi|501821092|ref|WP_012648773.1|3-oxoacyl-ACP synthase [Geobacter daltonii]	WP_012648773.1,ACM22047.1
TRINITY_DN36488_c0_g1_i1	3-oxoacyl-acp synthase	787	1	0.725326	0.42	3	F:transferase activity; P:metabolic process; F:catalytic activity		F:GO:0016740; P:GO:0008152; F:GO:0003824	41.9726	gi|490823491|ref|WP_004685581.1|beta-ketoacyl-ACP synthase II [Brucella melitensis]	WP_004685581.1,EEZ11691.1,ENQ89367.1,ENQ96042.1,ENS89870.1,ENT74489.1,AIJ86444.1,KKO94624.1,KYW84027.1,KYW89403.1
TRINITY_DN11219_c0_g1_i1	3-oxoacyl-acp synthase	217	1	1.74589e-29	1	0	-		-
TRINITY_DN26471_c0_g2_i1	3-oxoacyl-acp synthase	306	1	8.23818	0.56	0	-		-
TRINITY_DN47112_c0_g1_i1	3-oxoacyl-acp synthase	370	1	5.00495	0.44	0	-		-
TRINITY_DN11219_c0_g2_i1	3-oxoacyl-acp synthase	246	1	2.70287e-39	0.98	0	-		-
TRINITY_DN22203_c0_g3_i1	3-oxoacyl-acp synthase	253	1	0.983858	0.58	0	-		-
TRINITY_DN32903_c1_g6_i1	3-oxoacyl-acp synthase	356	1	1.20578	0.45	0	-		-
TRINITY_DN22024_c0_g2_i1	3-oxoacyl-acp synthase	436	1	0.159477	0.48	0	-		-
TRINITY_DN19635_c0_g1_i1	3-phenylpropionic acid transporter	490	1	1.91376	0.44	0	-		-
TRINITY_DN56299_c0_g1_i1	3-phosphoglycerate dehydrogenase	726	1	0.93289	0.43	0	-		-
TRINITY_DN64667_c0_g1_i1	3-phosphoglycerate kinase	202	1	8.30434	0.6	8	F:kinase activity; F:ATP binding; P:phosphorylation; C:cytoplasm; F:transferase activity; F:phosphoglycerate kinase activity; F:nucleotide binding; P:glycolytic process		F:GO:0016301; F:GO:0005524; P:GO:0016310; C:GO:0005737; F:GO:0016740; F:GO:0004618; F:GO:0000166; P:GO:0006096	33.8834	gi|81250753|gb|ABB69776.1|3-phosphoglycerate kinase [Nitrosospira sp. 9SS1]	ABB69776.1
TRINITY_DN57310_c0_g1_i1	3-phosphoserine phosphohydroxythreonine aminotransferase	273	1	6.20069e-19	0.65	0	-		-
TRINITY_DN56038_c0_g1_i1	3-phosphoserine phosphohydroxythreonine aminotransferase	299	1	4.35028	0.64	0	-		-
TRINITY_DN25461_c0_g1_i1	3-phosphoshikimate 1-carboxyvinyltransferase	849	1	6.12036	0.44	0	-		-
TRINITY_DN32681_c0_g1_i1	3-phosphoshikimate 1-carboxyvinyltransferase	210	1	2.11258	0.64	0	-		-
TRINITY_DN32681_c0_g1_i6	3-phosphoshikimate 1-carboxyvinyltransferase	268	1	6.94864	0.66	0	-		-
TRINITY_DN60120_c0_g1_i1	3-phosphoshikimate 1-carboxyvinyltransferase	208	1	0.689932	0.57	0	-		-
TRINITY_DN15145_c0_g1_i1	3-phytase b protein	949	1	5.85389	0.47	2	P:dephosphorylation; F:acid phosphatase activity		P:GO:0016311; F:GO:0003993	38.891	gi|615400740|ref|XP_007580198.1|putative 3-phytase b protein [Neofusicoccum parvum UCRNP2]	XP_007580198.1,EOD52321.1
TRINITY_DN1293_c0_g1_i1	4 -demethylrebeccamycin synthase-like protein	334	1	0.36793	0.61	0	-		-
TRINITY_DN5340_c0_g1_i1	4 -phosphopantetheinyl transferase	621	1	1.77107	0.56	9	F:transferase activity; P:macromolecule biosynthetic process; P:fatty acid biosynthetic process; P:fatty acid metabolic process; P:lipid metabolic process; C:cytoplasm; F:holo-[acyl-carrier-protein] synthase activity; F:metal ion binding; F:magnesium ion binding		F:GO:0016740; P:GO:0009059; P:GO:0006633; P:GO:0006631; P:GO:0006629; C:GO:0005737; F:GO:0008897; F:GO:0046872; F:GO:0000287	38.1206	gi|497559371|ref|WP_009873555.1|holo-ACP synthase [Chlamydia trachomatis]	WP_009873555.1,YP_001654439.1,B0B9K8.1,B0BB87.1,CAP03795.1,CAP06749.1,AEJ77653.1,CCP51389.1,CCP61242.1,CCP62133.1,CCP63025.1,CCP63915.1,CCP64804.1,CCP65694.1,CCP66584.1,CCP67472.1,CCP68362.1,CCP69254.1,CCP70144.1,CCP71034.1,CCP90199.1,CCP91089.1,CCP91981.1,CCP92874.1,CCP93764.1,AGJ65394.1,AGJ64454.1,AGR93515.1,AGR94439.1,AGR96317.1,AGR97244.1,AGS00971.1,AGS02853.1,AGS03778.1,AKC30329.1,AKC31239.1…
TRINITY_DN54018_c0_g1_i1	4 -phosphopantetheinyl transferase	205	1	5.04778	0.54	6	F:metal ion binding; F:holo-[acyl-carrier-protein] synthase activity; F:transferase activity; F:magnesium ion binding; P:fatty acid biosynthetic process; P:macromolecule biosynthetic process		F:GO:0046872; F:GO:0008897; F:GO:0016740; F:GO:0000287; P:GO:0006633; P:GO:0009059	34.6538	gi|489607723|ref|WP_003512164.1|4'-phosphopantetheinyl transferase [Ruminiclostridium thermocellum]	WP_003512164.1,ABN51377.1,EEU01445.1,EFB38511.1,ADU75137.1,EIC04831.1,CDG34818.1,ALX09112.1,ANV76864.1
TRINITY_DN58610_c0_g1_i1	4 -phosphopantetheinyl transferase	308	1	3.4291	0.51	4	F:holo-[acyl-carrier-protein] synthase activity; F:transferase activity; F:magnesium ion binding; P:macromolecule biosynthetic process		F:GO:0008897; F:GO:0016740; F:GO:0000287; P:GO:0009059	36.1946	gi|504890827|ref|WP_015077929.1|4'-phosphopantetheinyl transferase [Carnobacterium maltaromaticum]	WP_015077929.1,CCO13043.2,KRN68741.1
TRINITY_DN28994_c0_g1_i3	4 -phosphopantetheinyl transferase	269	1	0.444584	0.53	0	-		-
TRINITY_DN1712_c0_g1_i1	4 -phosphopantetheinyl transferase	237	1	0.590889	0.6	0	-		-
TRINITY_DN22227_c0_g1_i1	4 -phosphopantetheinyl transferase isoform x2	1232	1	7.89615	0.44	0	-		-
TRINITY_DN25444_c0_g1_i1	4.1 protein [Daphnia magna]	442	1	3.89186e-09	0.71	0	-		-
TRINITY_DN35260_c0_g1_i1	4.1 protein [Daphnia magna]	2104	1	5.50712e-91	0.84	0	-		-
TRINITY_DN35260_c0_g1_i2	4.1 protein [Daphnia magna]	3112	1	2.34746e-173	0.67	0	-		-
TRINITY_DN20807_c0_g1_i1	40s ribosomal protein	504	1	3.66545e-58	0.81	5	C:ribosome; F:structural constituent of ribosome; F:RNA binding; P:translation; P:ribosome biogenesis	-	C:GO:0005840; F:GO:0003735; F:GO:0003723; P:GO:0006412; P:GO:0042254	187.578	gi|118372788|ref|XP_001019588.1|40S ribosomal protein S18, putative [Tetrahymena thermophila SB210]	XP_001019588.1,2XZM,2XZN,4BPE,4BPN,4BPO,4BPP,EAR99343.1,DAA33982.1
TRINITY_DN9662_c0_g1_i1	40s ribosomal protein	237	1	2.59298e-17	0.81	4	F:structural constituent of ribosome; P:rRNA export from nucleus; C:cytosolic small ribosomal subunit; P:translation	-	F:GO:0003735; P:GO:0006407; C:GO:0022627; P:GO:0006412	77.411	gi|118358070|ref|XP_001012283.1|40S ribosomal protein S28e, putative [Tetrahymena thermophila SB210]	XP_001012283.1,2XZM,2XZN,4BPE,4BPN,4BPO,4BPP,EAR92038.1,DAA33992.1
TRINITY_DN9662_c0_g2_i1	40s ribosomal protein	237	1	3.93679e-18	0.84	4	F:structural constituent of ribosome; P:rRNA export from nucleus; C:cytosolic small ribosomal subunit; P:translation	-	F:GO:0003735; P:GO:0006407; C:GO:0022627; P:GO:0006412	79.337	gi|118358070|ref|XP_001012283.1|40S ribosomal protein S28e, putative [Tetrahymena thermophila SB210]	XP_001012283.1,2XZM,2XZN,4BPE,4BPN,4BPO,4BPP,EAR92038.1,DAA33992.1
TRINITY_DN15233_c0_g1_i1	40s ribosomal protein	218	1	1.72097e-14	0.82	4	F:structural constituent of ribosome; P:rRNA export from nucleus; C:cytosolic small ribosomal subunit; P:translation	-	F:GO:0003735; P:GO:0006407; C:GO:0022627; P:GO:0006412	70.0922	gi|118358070|ref|XP_001012283.1|40S ribosomal protein S28e, putative [Tetrahymena thermophila SB210]	XP_001012283.1,2XZM,2XZN,4BPE,4BPN,4BPO,4BPP,EAR92038.1,DAA33992.1
TRINITY_DN46042_c0_g1_i1	40s ribosomal protein	756	1	3.28035e-86	0.8	4	F:structural constituent of ribosome; C:cytosolic small ribosomal subunit; P:translation; P:ribosome biogenesis	-	F:GO:0003735; C:GO:0022627; P:GO:0006412; P:GO:0042254	265.774	gi|470420302|ref|XP_004337280.1|40S ribosomal protein S3a, putative [Acanthamoeba castellanii str. Neff]	XP_004337280.1,ELR15267.1
TRINITY_DN15557_c0_g1_i1	40s ribosomal protein	423	1	7.94275e-47	0.8	0	-		-
TRINITY_DN47407_c0_g1_i1	40s ribosomal protein	660	1	1.49038e-88	0.86	0	-		-
TRINITY_DN11055_c0_g1_i1	40s ribosomal protein partial	843	1	2.40751e-105	0.8	4	F:structural constituent of ribosome; C:small ribosomal subunit; P:translation; P:ribosome biogenesis	-	F:GO:0003735; C:GO:0015935; P:GO:0006412; P:GO:0042254	313.923	gi|469664517|gb|AGH70213.1|40S ribosomal protein SA, partial [Placozoa sp. H4]	AGH70213.1
TRINITY_DN34182_c0_g2_i1	40s ribosomal protein partial	211	1	5.76756e-19	1	0	-		-
TRINITY_DN32848_c0_g1_i6	40s ribosomal protein partial	303	1	6.63519e-09	0.94	0	-		-
TRINITY_DN34182_c0_g1_i3	40s ribosomal protein partial	246	1	1.32922e-16	0.94	0	-		-
TRINITY_DN3516_c1_g1_i1	40s ribosomal protein partial	619	1	3.95423e-97	0.94	0	-		-
TRINITY_DN34182_c0_g1_i1	40s ribosomal protein partial	497	1	5.07952e-85	0.96	0	-		-
TRINITY_DN13471_c0_g2_i1	40s ribosomal protein partial	577	1	5.08997e-64	0.88	0	-		-
TRINITY_DN47826_c0_g1_i1	40s ribosomal protein partial	202	1	1.8139e-10	0.85	0	-		-
TRINITY_DN40822_c0_g1_i1	40s ribosomal protein partial	682	1	5.19834e-112	0.96	0	-		-
TRINITY_DN25866_c0_g1_i2	40s ribosomal protein partial	348	1	5.53396e-09	0.91	0	-		-
TRINITY_DN25866_c0_g1_i1	40s ribosomal protein partial	224	1	1.34463e-09	0.91	0	-		-
TRINITY_DN14553_c0_g1_i1	40s ribosomal protein partial	282	1	0.356181	0.67	0	-		-
TRINITY_DN34182_c0_g2_i2	40s ribosomal protein partial	230	1	3.3047e-21	0.97	0	-		-
TRINITY_DN29379_c0_g1_i2	40s ribosomal protein partial	435	1	5.19955e-65	0.88	0	-		-
TRINITY_DN26527_c0_g1_i2	40s ribosomal protein partial	831	1	3.32972e-94	1	0	-		-
TRINITY_DN11894_c0_g1_i1	40s ribosomal protein s10	204	1	7.93015e-14	0.97	0	-		-
TRINITY_DN11894_c0_g2_i1	40s ribosomal protein s10	563	1	1.68646e-86	0.93	0	-		-
TRINITY_DN60872_c0_g1_i1	40s ribosomal protein s10	562	1	1.57856e-42	0.8	0	-		-
TRINITY_DN16897_c0_g1_i1	40s ribosomal protein s10	736	1	1.33199e-85	0.93	0	-		-
TRINITY_DN36120_c0_g1_i1	40s ribosomal protein s10-1	471	1	1.32225e-44	0.71	1	C:ribosome		C:GO:0005840	152.14	gi|566169369|ref|XP_006382656.1|40S ribosomal protein S10-1 [Populus trichocarpa]	XP_006382656.1,ERP60453.1
TRINITY_DN31359_c0_g2_i2	40s ribosomal protein s11	495	1	4.21622e-83	0.94	0	-		-
TRINITY_DN31359_c0_g2_i4	40s ribosomal protein s11	212	1	8.63871e-24	0.87	0	-		-
TRINITY_DN24662_c0_g1_i1	40s ribosomal protein s11 isoform x1	608	1	8.94888e-88	0.94	0	-		-
TRINITY_DN16800_c0_g1_i1	40s ribosomal protein s12	962	1	8.8166e-80	0.92	0	-		-
TRINITY_DN34096_c0_g1_i2	40s ribosomal protein s12	576	1	8.10892e-82	0.92	0	-		-
TRINITY_DN34096_c0_g1_i1	40s ribosomal protein s12	467	1	2.47486e-74	0.92	0	-		-
TRINITY_DN16800_c0_g2_i1	40s ribosomal protein s12	962	1	8.8166e-80	0.92	0	-		-
TRINITY_DN34096_c0_g2_i1	40s ribosomal protein s12	266	1	1.55122e-18	0.88	0	-		-
TRINITY_DN34096_c0_g1_i3	40s ribosomal protein s12	458	1	1.31035e-61	0.92	0	-		-
TRINITY_DN51194_c0_g1_i1	40s ribosomal protein s12-like	476	1	1.46507e-44	0.74	0	-		-
TRINITY_DN60853_c0_g1_i1	40s ribosomal protein s12-like	740	1	3.13179e-47	0.82	0	-		-
TRINITY_DN55976_c0_g1_i1	40s ribosomal protein s13	438	1	5.46048e-68	0.84	4	C:ribosome; F:structural constituent of ribosome; P:translation; P:ribosome biogenesis	-	C:GO:0005840; F:GO:0003735; P:GO:0006412; P:GO:0042254	211.46	gi|146185324|ref|XP_001031586.2|40S ribosomal protein S13 [Tetrahymena thermophila SB210]	XP_001031586.2,2XZM,2XZN,4BPE,4BPN,4BPO,4BPP,EAR83923.2,DAA33977.1
TRINITY_DN17845_c0_g2_i1	40s ribosomal protein s13	428	1	3.32016e-81	0.99	4	C:ribosome; F:structural constituent of ribosome; P:translation; P:ribosome biogenesis	-	C:GO:0005840; F:GO:0003735; P:GO:0006412; P:GO:0042254	244.588	gi|321460486|gb|EFX71528.1|hypothetical protein DAPPUDRAFT_308825 [Daphnia pulex]	EFX71528.1,KZS12594.1
TRINITY_DN20682_c0_g1_i1	40s ribosomal protein s13	663	1	1.05581e-105	0.98	0	-		-
TRINITY_DN17845_c0_g1_i1	40s ribosomal protein s13	291	1	1.35785e-32	1	0	-		-
TRINITY_DN42865_c0_g1_i1	40s ribosomal protein s13	357	1	8.12395e-07	0.72	0	-		-
TRINITY_DN17068_c0_g1_i1	40s ribosomal protein s14	523	1	9.23798e-65	0.87	4	C:ribosome; F:structural constituent of ribosome; P:translation; P:ribosome biogenesis	-	C:GO:0005840; F:GO:0003735; P:GO:0006412; P:GO:0042254	204.142	gi|146182837|ref|XP_001025389.2|40S ribosomal protein S14 [Tetrahymena thermophila SB210]	XP_001025389.2,2XZM,2XZN,4BPE,4BPN,4BPO,4BPP,EAS05144.2,DAA33978.1
TRINITY_DN26527_c0_g1_i1	40s ribosomal protein s14	318	1	3.03514e-41	0.92	4	C:ribosome; F:structural constituent of ribosome; P:translation; P:ribosome biogenesis	-	C:GO:0005840; F:GO:0003735; P:GO:0006412; P:GO:0042254	141.739	gi|321474831|gb|EFX85795.1|hypothetical protein DAPPUDRAFT_230521 [Daphnia pulex]	EFX85795.1,KZS11622.1
TRINITY_DN24289_c1_g1_i1	40s ribosomal protein s14	736	1	1.41143e-94	1	4	C:ribosome; F:structural constituent of ribosome; P:translation; P:ribosome biogenesis	-	C:GO:0005840; F:GO:0003735; P:GO:0006412; P:GO:0042254	282.722	gi|321474831|gb|EFX85795.1|hypothetical protein DAPPUDRAFT_230521 [Daphnia pulex]	EFX85795.1,KZS11622.1
TRINITY_DN26527_c0_g2_i1	40s ribosomal protein s14	553	1	2.46566e-34	0.94	0	-		-
TRINITY_DN5334_c0_g2_i1	40s ribosomal protein s15	456	1	1.72613e-46	0.75	1	C:ribosome	-	C:GO:0005840	156.762	gi|124088843|ref|XP_001347257.1|40s ribosomal protein S15 [Paramecium tetraurelia strain d4-2]	XP_001347257.1,XP_001423002.1,XP_001426539.1,XP_001437902.1,XP_001438725.1,XP_001439811.1,XP_001455317.1,XP_001457039.1,XP_001457935.1,CAH03631.1,CAK55604.1,CAK59141.1,CAK70505.1,CAK71328.1,CAK72414.1,CAK87920.1,CAK89642.1,CAK90538.1
TRINITY_DN5334_c0_g1_i1	40s ribosomal protein s15	456	1	4.59947e-47	0.75	1	C:ribosome	-	C:GO:0005840	158.303	gi|124088843|ref|XP_001347257.1|40s ribosomal protein S15 [Paramecium tetraurelia strain d4-2]	XP_001347257.1,XP_001423002.1,XP_001426539.1,XP_001437902.1,XP_001438725.1,XP_001439811.1,XP_001455317.1,XP_001457039.1,XP_001457935.1,CAH03631.1,CAK55604.1,CAK59141.1,CAK70505.1,CAK71328.1,CAK72414.1,CAK87920.1,CAK89642.1,CAK90538.1
TRINITY_DN25418_c0_g1_i1	40s ribosomal protein s15	517	1	7.13083e-57	0.96	0	-		-
TRINITY_DN45956_c0_g1_i1	40s ribosomal protein s15	227	1	3.9606e-37	0.95	0	-		-
TRINITY_DN3466_c0_g1_i1	40s ribosomal protein s15	460	1	3.47417e-58	0.81	0	-		-
TRINITY_DN37258_c0_g1_i1	40s ribosomal protein s15	230	1	2.95879e-24	0.72	0	-		-
TRINITY_DN16227_c0_g1_i1	40s ribosomal protein s15	572	1	1.06476e-56	0.96	0	-		-
TRINITY_DN57819_c0_g1_i1	40s ribosomal protein s15a	304	1	5.11441e-44	0.94	4	C:ribosome; F:structural constituent of ribosome; P:translation; P:ribosome biogenesis	-	C:GO:0005840; F:GO:0003735; P:GO:0006412; P:GO:0042254	147.902	gi|301095995|ref|XP_002897096.1|40S ribosomal protein S15a [Phytophthora infestans T30-4]	XP_002897096.1,XP_008915553.1,XP_009523228.1,EEY65467.1,EGZ20511.1,ETK71004.1,ETL24447.1,ETL77688.1,ETM30932.1,ETM99140.1,ETO59361.1,ETP00396.1,ETP28550.1,KUF76465.1,KUF95503.1
TRINITY_DN18574_c0_g1_i1	40s ribosomal protein s15a	492	1	5.22339e-71	0.9	4	C:ribosome; F:structural constituent of ribosome; P:translation; P:ribosome biogenesis	-	C:GO:0005840; F:GO:0003735; P:GO:0006412; P:GO:0042254	218.779	gi|369793852|gb|AEX20387.1|40S ribosomal protein S15a [Pyropia haitanensis]	AEX20387.1
TRINITY_DN18574_c0_g2_i1	40s ribosomal protein s15aa	356	1	2.75937e-58	0.89	0	-		-
TRINITY_DN44153_c0_g1_i1	40s ribosomal protein s15aa isoform x2	215	1	1.18762e-32	0.85	0	-		-
TRINITY_DN13082_c0_g1_i1	40s ribosomal protein s16	539	1	1.50751e-72	0.86	0	-		-
TRINITY_DN46072_c0_g1_i1	40s ribosomal protein s16	452	1	1.25914e-65	0.88	0	-		-
TRINITY_DN12960_c0_g1_i1	40s ribosomal protein s16 isoform x2	292	1	0.0307562	0.68	0	-		-
TRINITY_DN10895_c0_g2_i1	40s ribosomal protein s17	460	1	8.95748e-57	0.89	4	C:ribosome; F:structural constituent of ribosome; P:translation; P:ribosome biogenesis	-	C:GO:0005840; F:GO:0003735; P:GO:0006412; P:GO:0042254	182.185	gi|298711489|emb|CBJ26577.1|40S ribosomal protein S17 [Ectocarpus siliculosus]	CBJ26577.1
TRINITY_DN52144_c0_g1_i1	40s ribosomal protein s17	271	1	4.02017e-16	0.91	4	C:ribosome; F:structural constituent of ribosome; P:translation; P:ribosome biogenesis	-	C:GO:0005840; F:GO:0003735; P:GO:0006412; P:GO:0042254	76.6406	gi|118384398|ref|XP_001025347.1|40S ribosomal protein S17 [Tetrahymena thermophila SB210]	XP_001025347.1,2XZM,2XZN,4BPE,4BPN,4BPO,4BPP,EAS05102.1,DAA33981.1
TRINITY_DN10895_c0_g1_i1	40s ribosomal protein s17	286	1	2.64077e-12	0.81	4	C:ribosome; F:structural constituent of ribosome; P:translation; P:ribosome biogenesis	-	C:GO:0005840; F:GO:0003735; P:GO:0006412; P:GO:0042254	67.0106	gi|308803456|ref|XP_003079041.1|Putative 40S ribosomal protein S17 (ISS) [Ostreococcus tauri]	XP_003079041.1,CAL51922.1
TRINITY_DN7441_c0_g1_i1	40s ribosomal protein s17	406	1	5.04834e-26	0.93	4	C:ribosome; F:structural constituent of ribosome; P:translation; P:ribosome biogenesis	-	C:GO:0005840; F:GO:0003735; P:GO:0006412; P:GO:0042254	103.605	gi|118384398|ref|XP_001025347.1|40S ribosomal protein S17 [Tetrahymena thermophila SB210]	XP_001025347.1,2XZM,2XZN,4BPE,4BPN,4BPO,4BPP,EAS05102.1,DAA33981.1
TRINITY_DN28090_c1_g1_i1	40s ribosomal protein s17	1186	1	2.10355e-73	0.97	0	-		-
TRINITY_DN36075_c0_g1_i1	40s ribosomal protein s17	1181	1	1.57624e-73	0.97	0	-		-
TRINITY_DN28090_c1_g1_i2	40s ribosomal protein s17	1135	1	1.24779e-73	0.97	0	-		-
TRINITY_DN31076_c0_g1_i7	40s ribosomal protein s17-like	214	1	5.18503	0.53	0	-		-
TRINITY_DN25866_c0_g2_i1	40s ribosomal protein s19	231	1	2.19043e-09	0.84	0	-		-
TRINITY_DN45406_c0_g1_i1	40s ribosomal protein s19-3- partial	213	1	0.734751	0.56	0	-		-
TRINITY_DN31491_c0_g2_i2	40s ribosomal protein s19a	522	1	7.88584e-93	0.95	4	C:ribosome; F:structural constituent of ribosome; P:translation; P:ribosome biogenesis	-	C:GO:0005840; F:GO:0003735; P:GO:0006412; P:GO:0042254	275.018	gi|321453501|gb|EFX64730.1|hypothetical protein DAPPUDRAFT_231884 [Daphnia pulex]	EFX64730.1,KZS10634.1
TRINITY_DN31491_c0_g2_i1	40s ribosomal protein s19a	584	1	8.37279e-67	0.96	4	C:ribosome; F:structural constituent of ribosome; P:translation; P:ribosome biogenesis	-	C:GO:0005840; F:GO:0003735; P:GO:0006412; P:GO:0042254	162.54	gi|321453501|gb|EFX64730.1|hypothetical protein DAPPUDRAFT_231884 [Daphnia pulex]	EFX64730.1,KZS10634.1
TRINITY_DN16470_c1_g1_i1	40s ribosomal protein s19a	654	1	1.13661e-92	0.95	4	C:ribosome; F:structural constituent of ribosome; P:translation; P:ribosome biogenesis	-	C:GO:0005840; F:GO:0003735; P:GO:0006412; P:GO:0042254	276.559	gi|321453501|gb|EFX64730.1|hypothetical protein DAPPUDRAFT_231884 [Daphnia pulex]	EFX64730.1,KZS10634.1
TRINITY_DN31491_c0_g2_i3	40s ribosomal protein s19a	542	1	1.00147e-92	0.95	4	C:ribosome; F:structural constituent of ribosome; P:translation; P:ribosome biogenesis	-	C:GO:0005840; F:GO:0003735; P:GO:0006412; P:GO:0042254	275.018	gi|321453501|gb|EFX64730.1|hypothetical protein DAPPUDRAFT_231884 [Daphnia pulex]	EFX64730.1,KZS10634.1
TRINITY_DN31491_c0_g2_i4	40s ribosomal protein s19a	604	1	9.32992e-67	0.96	4	C:ribosome; F:structural constituent of ribosome; P:translation; P:ribosome biogenesis	-	C:GO:0005840; F:GO:0003735; P:GO:0006412; P:GO:0042254	162.54	gi|321453501|gb|EFX64730.1|hypothetical protein DAPPUDRAFT_231884 [Daphnia pulex]	EFX64730.1,KZS10634.1
TRINITY_DN33202_c0_g1_i2	40s ribosomal protein s2	667	1	1.06897e-129	0.94	5	F:structural constituent of ribosome; F:RNA binding; C:small ribosomal subunit; P:translation; P:ribosome biogenesis	-	F:GO:0003735; F:GO:0003723; C:GO:0015935; P:GO:0006412; P:GO:0042254	375.555	gi|91081061|ref|XP_975415.1|PREDICTED: 40S ribosomal protein S2 [Tribolium castaneum]	XP_975415.1,EFA01765.1
TRINITY_DN26273_c0_g1_i1	40s ribosomal protein s2	934	1	1.5728e-155	0.98	0	-		-
TRINITY_DN33202_c0_g1_i3	40s ribosomal protein s2	299	1	4.7854e-35	1	0	-		-
TRINITY_DN33202_c0_g1_i1	40s ribosomal protein s2	828	1	3.25541e-151	0.98	0	-		-
TRINITY_DN33202_c0_g1_i4	40s ribosomal protein s2	793	1	3.40457e-150	0.98	0	-		-
TRINITY_DN30522_c0_g1_i4	40s ribosomal protein s20	415	1	3.6244e-60	0.97	5	F:structural constituent of ribosome; F:RNA binding; C:small ribosomal subunit; P:translation; P:ribosome biogenesis	-	F:GO:0003735; F:GO:0003723; C:GO:0015935; P:GO:0006412; P:GO:0042254	189.889	gi|321459212|gb|EFX70268.1|hypothetical protein DAPPUDRAFT_300540 [Daphnia pulex]	EFX70268.1,KZS10073.1
TRINITY_DN30522_c0_g1_i1	40s ribosomal protein s20	246	1	5.68654e-30	1	5	F:structural constituent of ribosome; F:RNA binding; C:small ribosomal subunit; P:translation; P:ribosome biogenesis	-	F:GO:0003735; F:GO:0003723; C:GO:0015935; P:GO:0006412; P:GO:0042254	110.923	gi|321459212|gb|EFX70268.1|hypothetical protein DAPPUDRAFT_300540 [Daphnia pulex]	EFX70268.1,KZS10073.1
TRINITY_DN30522_c0_g1_i5	40s ribosomal protein s20	736	1	3.11787e-46	1	5	F:structural constituent of ribosome; F:RNA binding; C:small ribosomal subunit; P:translation; P:ribosome biogenesis	-	F:GO:0003735; F:GO:0003723; C:GO:0015935; P:GO:0006412; P:GO:0042254	158.688	gi|321459212|gb|EFX70268.1|hypothetical protein DAPPUDRAFT_300540 [Daphnia pulex]	EFX70268.1,KZS10073.1
TRINITY_DN30522_c0_g1_i2	40s ribosomal protein s20	905	1	2.44647e-76	0.98	5	F:structural constituent of ribosome; F:RNA binding; C:small ribosomal subunit; P:translation; P:ribosome biogenesis	-	F:GO:0003735; F:GO:0003723; C:GO:0015935; P:GO:0006412; P:GO:0042254	237.654	gi|321459212|gb|EFX70268.1|hypothetical protein DAPPUDRAFT_300540 [Daphnia pulex]	EFX70268.1,KZS10073.1
TRINITY_DN30522_c0_g1_i3	40s ribosomal protein s20	320	1	5.41292e-34	0.96	5	F:structural constituent of ribosome; F:RNA binding; C:small ribosomal subunit; P:translation; P:ribosome biogenesis	-	F:GO:0003735; F:GO:0003723; C:GO:0015935; P:GO:0006412; P:GO:0042254	122.479	gi|321459212|gb|EFX70268.1|hypothetical protein DAPPUDRAFT_300540 [Daphnia pulex]	EFX70268.1,KZS10073.1
TRINITY_DN22101_c0_g1_i1	40s ribosomal protein s20	635	1	9.61295e-78	0.98	5	F:structural constituent of ribosome; F:RNA binding; C:small ribosomal subunit; P:translation; P:ribosome biogenesis	-	F:GO:0003735; F:GO:0003723; C:GO:0015935; P:GO:0006412; P:GO:0042254	237.654	gi|321459212|gb|EFX70268.1|hypothetical protein DAPPUDRAFT_300540 [Daphnia pulex]	EFX70268.1,KZS10073.1
TRINITY_DN41956_c0_g1_i1	40s ribosomal protein s20	334	1	4.96627e-27	0.68	1	C:intracellular	-	C:GO:0005622	105.916	gi|675174473|ref|XP_008896121.1|40S ribosomal protein S20 [Phytophthora parasitica INRA-310]	XP_008896121.1,ETN18450.1
TRINITY_DN63395_c0_g1_i1	40s ribosomal protein s20	243	1	1.11975e-46	0.97	0	-		-
TRINITY_DN829_c0_g2_i1	40s ribosomal protein s20-1	436	1	3.28446e-58	0.86	0	-		-
TRINITY_DN829_c0_g1_i1	40s ribosomal protein s20-1	436	1	3.28446e-58	0.86	0	-		-
TRINITY_DN65003_c0_g1_i1	40s ribosomal protein s21	240	1	3.98509e-26	0.79	0	-		-
TRINITY_DN350_c0_g1_i1	40s ribosomal protein s21	795	1	1.90867e-49	0.98	0	-		-
TRINITY_DN4038_c0_g1_i1	40s ribosomal protein s21	381	1	2.1597e-23	0.71	0	-		-
TRINITY_DN15979_c0_g1_i1	40s ribosomal protein s21	325	1	2.20457e-50	0.98	0	-		-
TRINITY_DN15897_c0_g1_i1	40s ribosomal protein s21	296	1	3.88957e-22	0.68	0	-		-
TRINITY_DN62732_c0_g1_i1	40s ribosomal protein s23	552	1	4.00973e-84	0.9	4	F:structural constituent of ribosome; C:small ribosomal subunit; P:translation; P:ribosome biogenesis	-	F:GO:0003735; C:GO:0015935; P:GO:0006412; P:GO:0042254	253.447	gi|85001435|ref|XP_955435.1|40s ribosomal protein s23 [Theileria annulata strain Ankara]	XP_955435.1,CAI75959.1
TRINITY_DN56916_c0_g1_i1	40s ribosomal protein s23	246	1	1.32615e-43	0.93	4	F:structural constituent of ribosome; C:small ribosomal subunit; P:translation; P:ribosome biogenesis	-	F:GO:0003735; C:GO:0015935; P:GO:0006412; P:GO:0042254	146.362	gi|675212637|ref|XP_008915203.1|40S ribosomal protein S23 [Phytophthora parasitica INRA-310]	XP_008915203.1,XP_009533268.1,EGZ10523.1,ETI30946.1,ETK71333.1,ETL24778.1,ETL77999.1,ETM31257.1,ETM99465.1,ETO59656.1,ETP00749.1,ETP28908.1
TRINITY_DN20233_c0_g1_i1	40s ribosomal protein s23	418	1	1.06515e-69	0.88	4	F:structural constituent of ribosome; C:small ribosomal subunit; P:translation; P:ribosome biogenesis	-	F:GO:0003735; C:GO:0015935; P:GO:0006412; P:GO:0042254	214.927	gi|449102256|gb|AGE89261.1|40S ribosomal protein S23 [Cryptocaryon irritans]	AGE89261.1
TRINITY_DN31371_c0_g1_i1	40s ribosomal protein s23	216	1	7.1766e-20	0.89	0	-		-
TRINITY_DN17432_c0_g1_i1	40s ribosomal protein s23	696	1	1.80347e-99	0.96	0	-		-
TRINITY_DN31371_c0_g1_i4	40s ribosomal protein s23	237	1	6.04335e-20	1	0	-		-
TRINITY_DN31371_c0_g1_i2	40s ribosomal protein s23	481	1	2.21489e-81	0.96	0	-		-
TRINITY_DN11740_c0_g1_i1	40s ribosomal protein s23- partial	342	1	0.00171205	0.76	0	-		-
TRINITY_DN11740_c0_g2_i1	40s ribosomal protein s23- partial	351	1	0.00065284	0.78	0	-		-
TRINITY_DN16721_c0_g1_i1	40s ribosomal protein s24	577	1	5.47295e-76	0.95	0	-		-
TRINITY_DN34815_c0_g1_i2	40s ribosomal protein s24	518	1	1.65327e-76	0.95	0	-		-
TRINITY_DN34815_c0_g1_i5	40s ribosomal protein s24	507	1	2.21437e-76	0.95	0	-		-
TRINITY_DN16721_c0_g2_i1	40s ribosomal protein s24	640	1	1.2153e-75	0.95	0	-		-
TRINITY_DN34815_c0_g1_i1	40s ribosomal protein s24 isoform x1	222	1	3.77531e-13	0.74	0	-		-
TRINITY_DN20088_c0_g1_i1	40s ribosomal protein s25	595	1	2.00979e-42	0.96	0	-		-
TRINITY_DN30927_c0_g1_i2	40s ribosomal protein s25	450	1	4.08366e-43	0.96	0	-		-
TRINITY_DN30927_c0_g1_i3	40s ribosomal protein s25	470	1	4.47303e-43	0.96	0	-		-
TRINITY_DN38134_c0_g1_i1	40s ribosomal protein s25-b	414	1	2.26509e-12	0.69	1	C:ribosome		C:GO:0005840	68.1662	gi|385304892|gb|EIF48893.1|40s ribosomal protein s25-b [Brettanomyces bruxellensis AWRI1499]	EIF48893.1
TRINITY_DN13471_c0_g1_i1	40s ribosomal protein s26	399	1	4.66483e-49	0.95	0	-		-
TRINITY_DN54544_c0_g1_i1	40s ribosomal protein s26-like	252	1	0.0548399	0.54	0	-		-
[truncated: 101,994 more rows]

## Sheet: Table S5
1	2	Cd	BaP
1.1 Carbohydrate metabolism
	Citrate cycle (TCA cycle)	2	2
	Pentose phosphate pathway	4	4
	Pentose and glucuronate interconversions	2	1
	Fructose and mannose metabolism	4	4
	Galactose metabolism	2	1
	Ascorbate and aldarate metabolism	5	5
	Starch and sucrose metabolism	6	5
	Pyruvate metabolism	0	2
[truncated: 217 more rows]
